# Supplementary material for: Single-cell and spatial transcriptomic analyses reveal the cellular origins and drivers of liver metastasis from pancreatic cancer
Source: Research Square preprint supplement (doi:10.21203/rs.3.rs-4128922/v1), 2024-04-18
Supplement: Supplementary file 1 [file 7ae5219085dda770f83c6a11.xlsx]

## Sheet: Table S1
Table S1 The information of primary tumor and liver metastatic pancreatic cancer samples in the GEO databas
geo_id	sample	group	input_file
GSM4730260	P1	PT	/data/PROJECT/singleCell/pancreatic_cancer/data/GSE156405/GSM4730260/P1_filtered_feature_bc_matrix
GSM4730261	P2	PT	/data/PROJECT/singleCell/pancreatic_cancer/data/GSE156405/GSM4730261/P2_filtered_feature_bc_matrix
GSM4730262	P3	PT	/data/PROJECT/singleCell/pancreatic_cancer/data/GSE156405/GSM4730262/P3_filtered_feature_bc_matrix
GSM4730263	P4	PT	/data/PROJECT/singleCell/pancreatic_cancer/data/GSE156405/GSM4730263/P4_filtered_feature_bc_matrix
GSM4730264	P5	PT	/data/PROJECT/singleCell/pancreatic_cancer/data/GSE156405/GSM4730264/P5_filtered_feature_bc_matrix
GSM4730266	LiM	LM	/data/PROJECT/singleCell/pancreatic_cancer/data/GSE156405/GSM4730266/LiM_filtered_feature_bc_matrix
GSM4679532	P01	PT	/data/PROJECT/singleCell/pancreatic_cancer/data/GSE154778/sort_data/P01
GSM4679533	P02	PT	/data/PROJECT/singleCell/pancreatic_cancer/data/GSE154778/sort_data/P02
GSM4679534	P03	PT	/data/PROJECT/singleCell/pancreatic_cancer/data/GSE154778/sort_data/P03
GSM4679535	P04	PT	/data/PROJECT/singleCell/pancreatic_cancer/data/GSE154778/sort_data/P04
GSM4679536	P05	PT	/data/PROJECT/singleCell/pancreatic_cancer/data/GSE154778/sort_data/P05
GSM4679537	P06	PT	/data/PROJECT/singleCell/pancreatic_cancer/data/GSE154778/sort_data/P06
GSM4679538	P07	PT	/data/PROJECT/singleCell/pancreatic_cancer/data/GSE154778/sort_data/P07
GSM4679539	P08	PT	/data/PROJECT/singleCell/pancreatic_cancer/data/GSE154778/sort_data/P08
GSM4679540	P09	PT	/data/PROJECT/singleCell/pancreatic_cancer/data/GSE154778/sort_data/P09
GSM4679541	P10	PT	/data/PROJECT/singleCell/pancreatic_cancer/data/GSE154778/sort_data/P10
GSM4679542	MET01	LM	/data/PROJECT/singleCell/pancreatic_cancer/data/GSE154778/sort_data/MET01
GSM4679543	MET02	LM	/data/PROJECT/singleCell/pancreatic_cancer/data/GSE154778/sort_data/MET02
GSM4679545	MET04	LM	/data/PROJECT/singleCell/pancreatic_cancer/data/GSE154778/sort_data/MET04
GSM4679546	MET05	LM	/data/PROJECT/singleCell/pancreatic_cancer/data/GSE154778/sort_data/MET05
GSM4679547	MET06	LM	/data/PROJECT/singleCell/pancreatic_cancer/data/GSE154778/sort_data/MET06

## Sheet: Table S2
Table S2 The information of pancreatic cancer samples in the TCGA cohort
barcode	patient	sample	shortLetterCode	definition	sample_submitter_id	sample_type_id	tumor_descriptor	sample_id	sample_type	composition	days_to_collection	state	initial_weight	intermediate_dimension	pathology_report_uuid	submitter_id	shortest_dimension	oct_embedded	longest_dimension	is_ffpe	tissue_type	synchronous_malignancy	ajcc_pathologic_stage	days_to_diagnosis	last_known_disease_status	tissue_or_organ_of_origin	days_to_last_follow_up	age_at_diagnosis	primary_diagnosis	prior_malignancy	year_of_diagnosis	prior_treatment	ajcc_staging_system_edition	ajcc_pathologic_t	morphology	ajcc_pathologic_n	ajcc_pathologic_m	classification_of_tumor	diagnosis_id	icd_10_code	site_of_resection_or_biopsy	tumor_grade	progression_or_recurrence	cigarettes_per_day	alcohol_history	exposure_id	years_smoked	pack_years_smoked	race
TCGA-F2-7276-01A-11R-2156-07	TCGA-F2-7276-01A-11R-2156-07	TCGA-F2-7276	TCGA-F2-7276-01A	TP	Primary solid Tumor	TCGA-F2-7276-01A	1	Not Reported	f3c8c806-cf98-4d17-befc-3df3a4c3c7a9	Primary Tumor	Not Reported	NA	released	NA	0.9	35F25A99-E6C7-4748-8BE7-EA4867577A1B	TCGA-F2-7276	0.3	NA	1.6	FALSE	Not Reported	No	Stage IIB	0	not reported	Pancreas, NOS	NA	23713	Adenocarcinoma, NOS	no	2011	No	7th	T3	1940-03-01	N1	M0	not reported	b238a728-2acf-520b-a775-b817434b8dff	C25.9	Pancreas, NOS	not reported	not reported	NA	No	06419e12-2553-51f7-8265-ef228b01e6e9	NA	NA
TCGA-IB-7649-01A-11R-2156-07	TCGA-IB-7649-01A-11R-2156-07	TCGA-IB-7649	TCGA-IB-7649-01A	TP	Primary solid Tumor	TCGA-IB-7649-01A	1	Not Reported	814b2dbd-07f3-4063-a7df-f80511853045	Primary Tumor	Not Reported	NA	released	NA	0.6	fc689c64-8c88-492c-ac93-866ad0c243dd	TCGA-IB-7649	0.2	NA	1	FALSE	Not Reported	No	Stage IIB	0	not reported	Head of pancreas	NA	26773	Infiltrating duct carcinoma, NOS	no	2007	No	6th	T3	2000-03-01	N1	M0	not reported	7890a2b0-2dc8-5a55-b1e7-c354fed52a8e	C25.0	Head of pancreas	not reported	not reported	3.12329	No	a48d746e-1dae-5944-9015-e6c5df2c7117	NA	57
TCGA-HZ-7925-01A-11R-2156-07	TCGA-HZ-7925-01A-11R-2156-07	TCGA-HZ-7925	TCGA-HZ-7925-01A	TP	Primary solid Tumor	TCGA-HZ-7925-01A	1	Not Reported	4f6d03c5-e9b0-4a8a-b386-823c7a5de1db	Primary Tumor	Not Reported	NA	released	NA	0.8	cfb61832-a6b4-4bdf-9e3f-2f35be00601a	TCGA-HZ-7925	0.4	NA	0.9	FALSE	Not Reported	No	Stage IIB	0	not reported	Head of pancreas	361	24150	Infiltrating duct carcinoma, NOS	no	2011	No	7th	T3	2000-03-01	N1	MX	not reported	bcca5873-652b-5b77-92e6-a504de3a754b	C25.0	Head of pancreas	not reported	not reported	NA	No	160bdfa1-a465-5400-b81d-672f1f6284ed	NA	NA
TCGA-2L-AAQJ-01A-12R-A39D-07	TCGA-2L-AAQJ-01A-12R-A39D-07	TCGA-2L-AAQJ	TCGA-2L-AAQJ-01A	TP	Primary solid Tumor	TCGA-2L-AAQJ-01A	1	Not Reported	46b276c0-51c0-4f38-9856-09db792692ad	Primary Tumor	Not Reported	1254	released	170	NA	6809B31A-DBAA-4F82-AD24-54F77A191076	TCGA-2L-AAQJ	NA	FALSE	NA	FALSE	Not Reported	No	Stage III	0	not reported	Head of pancreas	NA	18103	Infiltrating duct carcinoma, NOS	no	2010	No	7th	T4	2000-03-01	N0	MX	not reported	eb3d2332-7f04-5aae-a0fd-259d64b183bd	C25.0	Head of pancreas	not reported	not reported	NA	Yes	240ea7e1-28b8-5fe0-be06-81e7a500eaca	NA	NA
TCGA-HZ-A77O-01A-11R-A33R-07	TCGA-HZ-A77O-01A-11R-A33R-07	TCGA-HZ-A77O	TCGA-HZ-A77O-01A	TP	Primary solid Tumor	TCGA-HZ-A77O-01A	1	Not Reported	3169e534-2fbb-4335-9a83-acab9071a573	Primary Tumor	Not Reported	84	released	40	NA	426F2D0F-C2A1-40FC-A001-83B737C0511C	TCGA-HZ-A77O	NA	TRUE	NA	FALSE	Not Reported	No	Stage IIB	0	not reported	Head of pancreas	11	28434	Infiltrating duct carcinoma, NOS	no	2013	No	7th	T2	2000-03-01	N1	MX	not reported	2c33acae-7538-54ae-8f71-57d72cbcf657	C25.0	Head of pancreas	not reported	not reported	NA	No	d898fc11-4f2f-547f-811c-2a0531d3c8ef	NA	NA
TCGA-IB-7887-01A-11R-2156-07	TCGA-IB-7887-01A-11R-2156-07	TCGA-IB-7887	TCGA-IB-7887-01A	TP	Primary solid Tumor	TCGA-IB-7887-01A	1	Not Reported	fdb06325-7545-495a-84c8-dfc5c3c209fb	Primary Tumor	Not Reported	NA	released	NA	0.5	596670ea-dfc3-4e9b-ab35-8dd63522f40f	TCGA-IB-7887	0.2	NA	1.2	FALSE	Not Reported	No	Stage IIB	0	not reported	Pancreas, NOS	NA	22990	Infiltrating duct carcinoma, NOS	no	2009	No	7th	T3	2000-03-01	N1	M0	not reported	8c96ddd1-ccd7-54c1-85a2-d00382af8e50	C25.9	Pancreas, NOS	not reported	not reported	1.09589	No	923f922d-2ef8-5e67-bd12-74f083838709	NA	20
TCGA-FB-AAPQ-01A-11R-A41B-07	TCGA-FB-AAPQ-01A-11R-A41B-07	TCGA-FB-AAPQ	TCGA-FB-AAPQ-01A	TP	Primary solid Tumor	TCGA-FB-AAPQ-01A	1	Not Reported	dbad19a2-7a1c-4d24-8805-c27c8eb6d859	Primary Tumor	Not Reported	2156	released	170	NA	1944F530-8A4C-4DC8-94B2-DE1B6151B22D	TCGA-FB-AAPQ	NA	TRUE	NA	FALSE	Not Reported	No	Stage IIB	0	not reported	Head of pancreas	NA	24078	Infiltrating duct carcinoma, NOS	no	2008	No	7th	T3	2000-03-01	N1	MX	not reported	dedf397b-e6d5-5249-a2db-9db55c2a3c90	C25.0	Head of pancreas	not reported	not reported	1.36986	No	bb3789fa-d2b8-50ef-9373-f4b46b07227e	25	25
TCGA-XD-AAUG-01A-61R-A41B-07	TCGA-XD-AAUG-01A-61R-A41B-07	TCGA-XD-AAUG	TCGA-XD-AAUG-01A	TP	Primary solid Tumor	TCGA-XD-AAUG-01A	1	Not Reported	744575cb-a16a-4f4c-ab75-b67085a5e56a	Primary Tumor	Not Reported	67	released	1140	NA	5980FD31-6C96-45D0-8324-5D777942D391	TCGA-XD-AAUG	NA	TRUE	NA	FALSE	Not Reported	No	Stage IV	0	not reported	Body of pancreas	420	24291	Infiltrating duct carcinoma, NOS	no	2013	No	7th	T3	2000-03-01	N1	M1	not reported	55a12fd8-58ce-5aff-ba65-68b4fc8566db	C25.1	Body of pancreas	not reported	not reported	NA	Yes	f19b25ca-6a4d-5ae1-9e7e-271dfe784b80	NA	NA
TCGA-YY-A8LH-01A-11R-A36G-07	TCGA-YY-A8LH-01A-11R-A36G-07	TCGA-YY-A8LH	TCGA-YY-A8LH-01A	TP	Primary solid Tumor	TCGA-YY-A8LH-01A	1	Not Reported	6515607b-b6d6-42b3-a0f1-b6fc896a0929	Primary Tumor	Not Reported	1717	released	150	NA	B1D3B194-868B-468E-9EED-37E24FA91D60	TCGA-YY-A8LH	NA	TRUE	NA	FALSE	Not Reported	No	Stage IIB	0	not reported	Tail of pancreas	2016	22376	Infiltrating duct carcinoma, NOS	no	2009	No	6th	T3	2000-03-01	N1	MX	not reported	47f15386-2200-5871-81a8-8c43dbefeaa5	C25.0	Tail of pancreas	not reported	not reported	2.52055	Yes	86bf5906-05e8-5f81-aa1b-589a2cf31b85	NA	46
TCGA-US-A77J-01A-11R-A32O-07	TCGA-US-A77J-01A-11R-A32O-07	TCGA-US-A77J	TCGA-US-A77J-01A	TP	Primary solid Tumor	TCGA-US-A77J-01A	1	Not Reported	1f0c7758-2c2a-4c39-bb82-ec1414273c41	Primary Tumor	Not Reported	1022	released	1060	NA	D16151A6-7021-48DB-A29D-79538DCD2B1D	TCGA-US-A77J	NA	TRUE	NA	FALSE	Not Reported	No	Stage IIB	0	not reported	Head of pancreas	NA	29904	Infiltrating duct carcinoma, NOS	no	2010	No	7th	T3	2000-03-01	N1b	MX	not reported	0f729d29-d560-5cbb-869c-b2e978f5dfd1	C25.0	Head of pancreas	not reported	not reported	NA	Yes	b2f5ff02-48e3-5366-a5ef-2deade601d31	NA	NA
TCGA-F2-A44H-01A-11R-A26U-07	TCGA-F2-A44H-01A-11R-A26U-07	TCGA-F2-A44H	TCGA-F2-A44H-01A	TP	Primary solid Tumor	TCGA-F2-A44H-01A	1	Not Reported	361bc661-b78b-455e-8444-fe20646082e8	Primary Tumor	Not Reported	105	released	60	NA	92960813-66CA-4229-A935-C02F9B3698F3	TCGA-F2-A44H	NA	FALSE	NA	FALSE	Not Reported	No	Stage IIA	0	not reported	Head of pancreas	586	24007	Adenocarcinoma, NOS	no	2012	No	7th	T3	1940-03-01	N0	M0	not reported	8caf076a-45b1-5efa-ad1f-86bc5b8c4447	C25.0	Head of pancreas	not reported	not reported	NA	No	709c4131-f471-5032-8b4c-9f4ac685232c	NA	NA
TCGA-3A-A9IB-01A-21R-A39D-07	TCGA-3A-A9IB-01A-21R-A39D-07	TCGA-3A-A9IB	TCGA-3A-A9IB-01A	TP	Primary solid Tumor	TCGA-3A-A9IB-01A	1	Not Reported	d0cb3f51-5c67-4e8d-adb0-e80a9518b8c7	Primary Tumor	Not Reported	1070	released	120	NA	4BAD0B4C-1CA9-4D06-9E93-478E35FFC613	TCGA-3A-A9IB	NA	TRUE	NA	FALSE	Not Reported	No	Stage IIB	0	not reported	Head of pancreas	NA	25312	Infiltrating duct carcinoma, NOS	no	2011	No	7th	T3	2000-03-01	N1	MX	not reported	326225fb-7486-529c-be35-32b6a26da25b	C25.0	Head of pancreas	not reported	not reported	0.273973	No	b833de43-7bf2-5601-9a9b-9cd7a45636e1	20	5
TCGA-LB-A7SX-01A-11R-A33R-07	TCGA-LB-A7SX-01A-11R-A33R-07	TCGA-LB-A7SX	TCGA-LB-A7SX-01A	TP	Primary solid Tumor	TCGA-LB-A7SX-01A	1	Not Reported	99272586-8546-49cd-971e-431622f1be4a	Primary Tumor	Not Reported	35	released	150	NA	24F140DA-8E12-429B-9699-525CD1F3A045	TCGA-LB-A7SX	NA	FALSE	NA	FALSE	Not Reported	No	Stage IIB	0	not reported	Head of pancreas	127	27295	Infiltrating duct carcinoma, NOS	yes	2013	No	7th	T3	2000-03-01	N1	MX	not reported	4114112b-a92d-5307-895c-18771bc2af95	C25.0	Head of pancreas	not reported	not reported	2.19178	Yes	a8414b29-2abc-5856-95d0-eb4df9f7e214	NA	40
TCGA-IB-A5SS-01A-11R-A32O-07	TCGA-IB-A5SS-01A-11R-A32O-07	TCGA-IB-A5SS	TCGA-IB-A5SS-01A	TP	Primary solid Tumor	TCGA-IB-A5SS-01A	1	Not Reported	d0792a88-62e1-4b9d-8ba9-ac40e2afaa50	Primary Tumor	Not Reported	491	released	680	NA	9A82F47C-BD4B-4773-A6CF-885CE56D491E	TCGA-IB-A5SS	NA	TRUE	NA	FALSE	Not Reported	No	Stage IIB	0	not reported	Tail of pancreas	NA	23431	Infiltrating duct carcinoma, NOS	yes	2011	No	7th	T3	2000-03-01	N1	M0	not reported	5efa0ec0-abfa-5b01-a7fd-12760680985c	C25.0	Tail of pancreas	not reported	not reported	1.09589	No	4d6056d9-21b6-5a89-b103-b3cd5ea7694f	NA	20
TCGA-IB-AAUS-01A-12R-A38C-07	TCGA-IB-AAUS-01A-12R-A38C-07	TCGA-IB-AAUS	TCGA-IB-AAUS-01A	TP	Primary solid Tumor	TCGA-IB-AAUS-01A	1	Not Reported	f1c49186-207b-460e-b4ff-769a7468d172	Primary Tumor	Not Reported	70	released	150	NA	FCA3763B-0CCE-4EFF-ACAA-FD05281A87D7	TCGA-IB-AAUS	NA	TRUE	NA	FALSE	Not Reported	No	Stage IIB	0	not reported	Head of pancreas	225	30684	Infiltrating duct carcinoma, NOS	no	2013	No	7th	T3	2000-03-01	N1	M0	not reported	9a3d01c0-ca93-546f-a9ab-24e8a44a1b5b	C25.0	Head of pancreas	not reported	not reported	2.19178	Yes	cf4ce67b-9ddf-52f9-8449-7aa0a0820547	65	40
TCGA-2J-AABU-01A-11R-A41B-07	TCGA-2J-AABU-01A-11R-A41B-07	TCGA-2J-AABU	TCGA-2J-AABU-01A	TP	Primary solid Tumor	TCGA-2J-AABU-01A	1	Not Reported	cdebcd86-57f0-4980-906b-7d1695f7c6f8	Primary Tumor	Not Reported	495	released	80	NA	BC3DD12A-AFD7-46B9-A537-D9BF705A208A	TCGA-2J-AABU	NA	TRUE	NA	FALSE	Not Reported	No	Stage IIB	0	not reported	Head of pancreas	NA	20641	Infiltrating duct carcinoma, NOS	no	2012	No	7th	T3	2000-03-01	N1	M0	not reported	25399ec8-407b-5517-84e8-2f24808db135	C25.0	Head of pancreas	not reported	not reported	NA	Yes	051cfee5-4e68-5c28-a2c4-ae0e9d110d98	NA	NA
TCGA-HV-AA8V-01A-11R-A41B-07	TCGA-HV-AA8V-01A-11R-A41B-07	TCGA-HV-AA8V	TCGA-HV-AA8V-01A	TP	Primary solid Tumor	TCGA-HV-AA8V-01A	1	Not Reported	9990dd32-a644-4f71-abda-346872e7e89c	Primary Tumor	Not Reported	435	released	30	NA	B2F0252D-63F9-4D78-BAA3-DE40F64A61D8	TCGA-HV-AA8V	NA	FALSE	NA	FALSE	Not Reported	No	Stage IIB	0	not reported	Head of pancreas	920	18357	Infiltrating duct carcinoma, NOS	no	2012	No	7th	T3	2000-03-01	N1	MX	not reported	14c4d460-3052-5ffe-b517-3a505a97dcfd	C25.0	Head of pancreas	not reported	not reported	3.28767	Yes	cbb0f1f1-d6ac-5856-9090-dc4b04eb2e0c	NA	60
TCGA-2J-AABE-01A-12R-A41B-07	TCGA-2J-AABE-01A-12R-A41B-07	TCGA-2J-AABE	TCGA-2J-AABE-01A	TP	Primary solid Tumor	TCGA-2J-AABE-01A	1	Not Reported	30c8e41c-2c27-4927-a4e8-c1ac81806d13	Primary Tumor	Not Reported	515	released	80	NA	16730789-69FC-4C59-9411-4472A4130F81	TCGA-2J-AABE	NA	TRUE	NA	FALSE	Not Reported	No	Stage IIA	0	not reported	Body of pancreas	676	26943	Infiltrating duct carcinoma, NOS	no	2012	No	7th	T3	2000-03-01	N0	M0	not reported	180d548a-17ab-56d7-ace5-b29edb809d9e	C25.1	Body of pancreas	not reported	not reported	0.120548	Yes	f6b7d9aa-4066-53b4-ae12-2e21ed3edf74	10	2.2
TCGA-IB-7890-01A-12R-2204-07	TCGA-IB-7890-01A-12R-2204-07	TCGA-IB-7890	TCGA-IB-7890-01A	TP	Primary solid Tumor	TCGA-IB-7890-01A	1	Not Reported	a9423161-fe22-45d8-bb7c-b5e886ff35cc	Primary Tumor	Not Reported	NA	released	NA	1	52e72f20-35e1-40db-b9e0-7ded4a7479e6	TCGA-IB-7890	0.3	NA	1.5	FALSE	Not Reported	No	Stage IB	0	not reported	Pancreas, NOS	NA	26747	Infiltrating duct carcinoma, NOS	no	2008	No	6th	T2	2000-03-01	N0	M0	not reported	687d000b-bb63-56a9-8b28-7a2dc64cebb6	C25.9	Pancreas, NOS	not reported	not reported	NA	Yes	ad5f7825-86bb-5802-b9e4-ae5bbadcbfa7	NA	NA
TCGA-F2-7273-01A-11R-2156-07	TCGA-F2-7273-01A-11R-2156-07	TCGA-F2-7273	TCGA-F2-7273-01A	TP	Primary solid Tumor	TCGA-F2-7273-01A	1	Not Reported	75adc049-2832-4cd8-a563-2961198eda63	Primary Tumor	Not Reported	NA	released	NA	1	9517F018-4ECE-459D-B850-E57C26990865	TCGA-F2-7273	0.6	NA	1.3	FALSE	Not Reported	No	Stage IIB	0	not reported	Pancreas, NOS	360	20071	Adenocarcinoma, NOS	no	2011	No	7th	T3	1940-03-01	N1	M0	not reported	9a16c361-478c-5bb8-adcc-26cd891bc2ac	C25.9	Pancreas, NOS	not reported	not reported	NA	No	bdb70bd0-21e2-5c3c-87b4-11210c3cad47	NA	NA
TCGA-H6-8124-01A-11R-2404-07	TCGA-H6-8124-01A-11R-2404-07	TCGA-H6-8124	TCGA-H6-8124-01A	TP	Primary solid Tumor	TCGA-H6-8124-01A	1	Not Reported	1c16619f-c448-430c-9965-3c34b8415514	Primary Tumor	Not Reported	NA	released	NA	0.4	50AC30F1-6158-491C-B7AF-20E64FD435BE	TCGA-H6-8124	0.3	NA	0.9	FALSE	Not Reported	No	Stage IIB	0	not reported	Head of pancreas	392	20741	Adenocarcinoma, NOS	no	2011	No	7th	T3	1940-03-01	N1	M0	not reported	f3bb3561-e57f-508f-8ca1-a3f2c3db8a07	C25.0	Head of pancreas	not reported	not reported	0.191781	Yes	3e3f32cc-6fb3-51d8-b682-333c4804adbc	7	3.5
TCGA-IB-7893-01A-11R-2204-07	TCGA-IB-7893-01A-11R-2204-07	TCGA-IB-7893	TCGA-IB-7893-01A	TP	Primary solid Tumor	TCGA-IB-7893-01A	1	Not Reported	ced8751e-3265-4cfe-8289-d2c66dd0139c	Primary Tumor	Not Reported	NA	released	NA	0.7	52e9b7dd-75da-49c0-b8ce-b2cd33f01887	TCGA-IB-7893	0.3	NA	1.5	FALSE	Not Reported	No	Stage IIA	0	not reported	Pancreas, NOS	NA	23703	Infiltrating duct carcinoma, NOS	no	2009	No	6th	T3	2000-03-01	N0	M0	not reported	21f56cab-cdd4-5a50-9a71-a014bd2b88b4	C25.9	Pancreas, NOS	not reported	not reported	NA	Yes	83b40b0a-393a-52e2-9dce-41eac32328e0	NA	NA
TCGA-US-A774-01A-21R-A32O-07	TCGA-US-A774-01A-21R-A32O-07	TCGA-US-A774	TCGA-US-A774-01A	TP	Primary solid Tumor	TCGA-US-A774-01A	1	Not Reported	6bf9833f-16c4-41b7-a244-c6866e1bba70	Primary Tumor	Not Reported	670	released	640	NA	4E5397E1-3584-4F5F-80FB-126A46B9FD73	TCGA-US-A774	NA	TRUE	NA	FALSE	Not Reported	No	Stage IIB	0	not reported	Head of pancreas	NA	27957	Infiltrating duct carcinoma, NOS	no	2011	No	7th	T3	2000-03-01	N1	MX	not reported	44c7d75a-8a33-5af9-8805-42951798095a	C25.0	Head of pancreas	not reported	not reported	0.254795	Yes	928e85f1-1de7-5a5b-8b40-7e6de9a94d9e	37	4.65
TCGA-3A-A9IL-01A-11R-A38C-07	TCGA-3A-A9IL-01A-11R-A38C-07	TCGA-3A-A9IL	TCGA-3A-A9IL-01A	TP	Primary solid Tumor	TCGA-3A-A9IL-01A	1	Not Reported	404aaa27-cd9a-4d9b-8579-f435bf3f1fa6	Primary Tumor	Not Reported	2505	released	40	NA	530378DE-962E-4E7F-A75A-42A5BE91712C	TCGA-3A-A9IL	NA	TRUE	NA	FALSE	Not Reported	No	Stage I	0	not reported	Body of pancreas	2741	14599	Neuroendocrine carcinoma, NOS	yes	2007	No	6th	T1	1946-03-01	NA	MX	not reported	30990af3-7018-5682-9bc5-902bbbd4266a	C25.1	Body of pancreas	not reported	not reported	NA	No	881c3eb1-0f98-5a01-a684-792fd9d46011	NA	NA
TCGA-IB-8127-01A-11R-2404-07	TCGA-IB-8127-01A-11R-2404-07	TCGA-IB-8127	TCGA-IB-8127-01A	TP	Primary solid Tumor	TCGA-IB-8127-01A	1	Not Reported	96d1051d-1a65-4c28-ada7-3b042bda803e	Primary Tumor	Not Reported	NA	released	NA	0.7	c26dbe28-7e0c-4e51-8f54-c14cf4f16086	TCGA-IB-8127	0.2	NA	2.3	FALSE	Not Reported	No	Stage IIB	0	not reported	Head of pancreas	522	21676	Infiltrating duct carcinoma, NOS	no	2011	No	7th	T3	2000-03-01	N1	M0	not reported	f7d653fb-7c2d-54c0-8158-fdcc9dfdca80	C25.0	Head of pancreas	not reported	not reported	2.19178	Not Reported	08152ae2-5f76-5ab6-a45d-3d42f22fd60e	40	40
TCGA-HZ-A4BK-01A-11R-A26U-07	TCGA-HZ-A4BK-01A-11R-A26U-07	TCGA-HZ-A4BK	TCGA-HZ-A4BK-01A	TP	Primary solid Tumor	TCGA-HZ-A4BK-01A	1	Not Reported	7a6451c0-143e-40d2-8ad1-9fd9e8546838	Primary Tumor	Not Reported	81	released	70	NA	553B5959-0DB1-4546-A723-55A31E21D403	TCGA-HZ-A4BK	NA	FALSE	NA	FALSE	Not Reported	No	Stage IIB	0	not reported	Head of pancreas	657	26503	Adenocarcinoma, NOS	yes	2012	No	7th	T3	1940-03-01	N1	MX	not reported	1b07daa8-a5d4-522b-8555-8609b6c8ba0a	C25.0	Head of pancreas	not reported	not reported	NA	No	99d930c8-7792-5363-9ae1-ae86b84e1e41	NA	NA
TCGA-HV-A7OP-01A-11R-A33R-07	TCGA-HV-A7OP-01A-11R-A33R-07	TCGA-HV-A7OP	TCGA-HV-A7OP-01A	TP	Primary solid Tumor	TCGA-HV-A7OP-01A	1	Not Reported	4a004132-335f-4299-88cd-95f473523ed3	Primary Tumor	Not Reported	453	released	80	NA	9CF238DA-57D1-4DDF-9ECB-23BC9F887056	TCGA-HV-A7OP	NA	FALSE	NA	FALSE	Not Reported	No	Stage IIB	0	not reported	Head of pancreas	978	26322	Infiltrating duct carcinoma, NOS	no	2012	No	7th	T3	2000-03-01	N1	M0	not reported	622433cf-f4c5-5c27-800b-34ad5d73b365	C25.0	Head of pancreas	not reported	not reported	NA	Yes	eea72f58-cbe4-5af9-906e-59ff90ffe1a3	NA	NA
TCGA-US-A779-01A-11R-A32O-07	TCGA-US-A779-01A-11R-A32O-07	TCGA-US-A779	TCGA-US-A779-01A	TP	Primary solid Tumor	TCGA-US-A779-01A	1	Not Reported	3245150d-7305-48e2-8245-9b917c37aaa3	Primary Tumor	Not Reported	937	released	650	NA	A6CC54BE-4719-4AB6-853A-824E2FAEC78F	TCGA-US-A779	NA	TRUE	NA	FALSE	Not Reported	No	Stage IIB	0	not reported	Head of pancreas	NA	20051	Infiltrating duct carcinoma, NOS	no	2011	No	7th	T3	2000-03-01	N1b	MX	not reported	cb0a0ce7-cc87-56a6-a681-1c51f9aeb4a7	C25.0	Head of pancreas	not reported	not reported	NA	Yes	4aff7f57-5c65-59b8-8b55-45acb1808f15	NA	NA
TCGA-IB-A7M4-01A-11R-A36G-07	TCGA-IB-A7M4-01A-11R-A36G-07	TCGA-IB-A7M4	TCGA-IB-A7M4-01A	TP	Primary solid Tumor	TCGA-IB-A7M4-01A	1	Not Reported	85cded8e-caa4-4a2e-9018-6628a34e0c5b	Primary Tumor	Not Reported	97	released	290	NA	84520A5B-EE82-4913-909A-851C3886F20C	TCGA-IB-A7M4	NA	TRUE	NA	FALSE	Not Reported	No	Stage IIB	0	not reported	Body of pancreas	483	29792	Infiltrating duct carcinoma, NOS	no	2013	No	7th	T3	2000-03-01	N1	MX	not reported	01db6015-3c9d-5728-a15a-83be42f6a716	C25.1	Body of pancreas	not reported	not reported	2.84932	Yes	374e86d6-9616-5112-a511-cd82350ae9b4	52	52
TCGA-HZ-7918-01A-11R-2156-07	TCGA-HZ-7918-01A-11R-2156-07	TCGA-HZ-7918	TCGA-HZ-7918-01A	TP	Primary solid Tumor	TCGA-HZ-7918-01A	1	Not Reported	42ae9a70-ea04-4403-86cc-3da6fd120cde	Primary Tumor	Not Reported	NA	released	NA	0.9	66cc897f-570a-4f7d-b134-71ad8066d40e	TCGA-HZ-7918	0.4	NA	1	FALSE	Not Reported	No	Stage IIB	0	not reported	Head of pancreas	969	26573	Infiltrating duct carcinoma, NOS	no	2011	No	7th	T3	2000-03-01	N1	M0	not reported	4349d76d-f574-59bf-80a9-3108f5e93d60	C25.0	Head of pancreas	not reported	not reported	NA	No	a600eb8c-9637-5f6e-8edf-00da7297cf69	NA	NA
TCGA-HZ-7923-01A-12R-2156-07	TCGA-HZ-7923-01A-12R-2156-07	TCGA-HZ-7923	TCGA-HZ-7923-01A	TP	Primary solid Tumor	TCGA-HZ-7923-01A	1	Not Reported	6d3105fb-405e-45bc-8d70-e43199f109d2	Primary Tumor	Not Reported	NA	released	NA	0.8	17ac260a-9a9a-4f64-bd00-9a54716911de	TCGA-HZ-7923	0.6	NA	0.9	FALSE	Not Reported	No	Stage IIA	0	not reported	Head of pancreas	314	23760	Infiltrating duct carcinoma, NOS	no	2011	No	7th	T3	2000-03-01	N0	MX	not reported	b90aad28-defe-5b14-9267-6ec11551afd9	C25.0	Head of pancreas	not reported	not reported	NA	Not Reported	08ae9c64-743f-56d8-b22f-31032f048564	NA	NA
TCGA-IB-7654-01A-11R-2156-07	TCGA-IB-7654-01A-11R-2156-07	TCGA-IB-7654	TCGA-IB-7654-01A	TP	Primary solid Tumor	TCGA-IB-7654-01A	1	Not Reported	53c7c6f8-3d1c-43db-b49f-c88ed37c741f	Primary Tumor	Not Reported	NA	released	NA	0.9	1e1548de-1985-4423-85fa-2d80fce62d06	TCGA-IB-7654	0.3	NA	1	FALSE	Not Reported	No	Stage IIB	0	not reported	Head of pancreas	NA	29292	Infiltrating duct carcinoma, NOS	yes	2008	Yes	7th	T2	2000-03-01	N1	M0	not reported	4f8ddaef-49c9-593c-ab35-75833462eeae	C25.0	Head of pancreas	not reported	not reported	NA	No	8e67d922-1341-5e1f-bd0b-6139c2e7eb70	NA	NA
TCGA-IB-AAUR-01A-21R-A38C-07	TCGA-IB-AAUR-01A-21R-A38C-07	TCGA-IB-AAUR	TCGA-IB-AAUR-01A	TP	Primary solid Tumor	TCGA-IB-AAUR-01A	1	Not Reported	b154365f-23f6-4a44-8e8f-8672db572133	Primary Tumor	Not Reported	79	released	340	NA	D7C86FB0-811D-4B63-A8DF-E8A7BFB117C6	TCGA-IB-AAUR	NA	TRUE	NA	FALSE	Not Reported	No	Stage IIB	0	not reported	Head of pancreas	338	24576	Infiltrating duct carcinoma, NOS	no	2013	No	7th	T3	2000-03-01	N1	M0	not reported	e9f96759-ecd3-5397-959b-665b54e260fa	C25.0	Head of pancreas	not reported	not reported	NA	Yes	f0a3c509-536a-531b-ac03-9d493abe7def	NA	NA
TCGA-IB-AAUT-01A-11R-A37L-07	TCGA-IB-AAUT-01A-11R-A37L-07	TCGA-IB-AAUT	TCGA-IB-AAUT-01A	TP	Primary solid Tumor	TCGA-IB-AAUT-01A	1	Not Reported	401b7bee-8bc5-4909-936b-afa27fdfa489	Primary Tumor	Not Reported	58	released	90	NA	1E0670AB-5722-4D62-9F92-20523E4FDAE7	TCGA-IB-AAUT	NA	TRUE	NA	FALSE	Not Reported	No	Stage IIB	0	not reported	Head of pancreas	287	23801	Mucinous adenocarcinoma	no	2013	No	7th	T2	1980-03-01	N1	M0	not reported	ea00f048-235c-53df-8007-70e44d4b0c49	C25.0	Head of pancreas	not reported	not reported	0.821918	Yes	abddb803-2e93-5cea-9a2a-81b0423691f0	15	15
TCGA-IB-7645-01A-22R-2204-07	TCGA-IB-7645-01A-22R-2204-07	TCGA-IB-7645	TCGA-IB-7645-01A	TP	Primary solid Tumor	TCGA-IB-7645-01A	1	Not Reported	93d309d1-2c1b-4189-8aee-0c87684c0b45	Primary Tumor	Not Reported	NA	released	NA	1.4	8a7e8a98-1835-4cc1-8c30-aa6bbbb1dcbc	TCGA-IB-7645	0.3	NA	2	FALSE	Not Reported	No	Stage IIB	0	not reported	Head of pancreas	NA	16126	Infiltrating duct carcinoma, NOS	no	2007	No	6th	T3	2000-03-01	N1	M0	not reported	0b73d531-749f-5d8f-808c-5abd1636f635	C25.0	Head of pancreas	not reported	not reported	NA	Not Reported	acff40c7-41eb-5ec8-920c-b0d970e6a8ca	NA	NA
TCGA-IB-A6UF-01A-23R-A33R-07	TCGA-IB-A6UF-01A-23R-A33R-07	TCGA-IB-A6UF	TCGA-IB-A6UF-01A	TP	Primary solid Tumor	TCGA-IB-A6UF-01A	1	Not Reported	13b7a6ae-5d87-4fce-88b8-0c526b6301f1	Primary Tumor	Not Reported	266	released	440	NA	64D079FF-A6FF-4F54-BEE0-E58F8C2BD0D4	TCGA-IB-A6UF	NA	TRUE	NA	FALSE	Not Reported	No	Stage IIB	0	not reported	Head of pancreas	666	23152	Infiltrating duct carcinoma, NOS	no	2012	No	7th	T3	2000-03-01	N1	M0	not reported	38044308-f868-5105-9b9f-d9ade0adc324	C25.0	Head of pancreas	not reported	not reported	2.19178	Yes	ecbcedb5-ec9e-5a0e-ad20-9b283c717645	NA	40
TCGA-IB-AAUP-01A-11R-A37L-07	TCGA-IB-AAUP-01A-11R-A37L-07	TCGA-IB-AAUP	TCGA-IB-AAUP-01A	TP	Primary solid Tumor	TCGA-IB-AAUP-01A	1	Not Reported	7ed25c2c-ec53-4ca0-9437-15a6b8fb764f	Primary Tumor	Not Reported	146	released	510	NA	DAFC0F31-63B8-4041-8D7C-F21D71A8A305	TCGA-IB-AAUP	NA	TRUE	NA	FALSE	Not Reported	No	Stage IIB	0	not reported	Head of pancreas	431	24864	Infiltrating duct carcinoma, NOS	no	2013	No	7th	T3	2000-03-01	N1	M0	not reported	4db3edb4-91e1-57a6-be2f-286beab8b4ed	C25.0	Head of pancreas	not reported	not reported	NA	Yes	c9a5c970-0879-57e1-853b-0e478abdce5b	NA	NA
TCGA-YH-A8SY-01A-11R-A37L-07	TCGA-YH-A8SY-01A-11R-A37L-07	TCGA-YH-A8SY	TCGA-YH-A8SY-01A	TP	Primary solid Tumor	TCGA-YH-A8SY-01A	1	Not Reported	80dccacc-f79c-4701-9fa7-77982fe7a9c7	Primary Tumor	Not Reported	936	released	720	NA	F26B8F86-CC18-4B90-BD82-CC010A144681	TCGA-YH-A8SY	NA	TRUE	NA	FALSE	Not Reported	No	NA	0	not reported	Head of pancreas	388	26859	Adenocarcinoma, NOS	no	2011	No	7th	T3	1940-03-01	N1	MX	not reported	c6aff320-0368-582b-9536-3b1a8b00969a	C25.0	Head of pancreas	not reported	not reported	NA	Yes	7b9c89d7-8fce-5166-885e-c8f4ab252c4d	NA	NA
TCGA-IB-A6UG-01A-32R-A33R-07	TCGA-IB-A6UG-01A-32R-A33R-07	TCGA-IB-A6UG	TCGA-IB-A6UG-01A	TP	Primary solid Tumor	TCGA-IB-A6UG-01A	1	Not Reported	567371df-10bf-4656-a705-b7bf369715b6	Primary Tumor	Not Reported	254	released	180	NA	E1FA7F32-07A8-435B-BA17-133EFD0295D9	TCGA-IB-A6UG	NA	TRUE	NA	FALSE	Not Reported	No	Stage IIB	0	not reported	Head of pancreas	NA	23751	Infiltrating duct carcinoma, NOS	no	2012	No	7th	T3	2000-03-01	N1	M0	not reported	ff1cad7a-b1ed-5173-b27d-18060d855715	C25.0	Head of pancreas	not reported	not reported	1.84932	Yes	c4c51da3-4cd9-5755-b5b5-bba7234817ee	NA	33.75
TCGA-OE-A75W-01A-12R-A32O-07	TCGA-OE-A75W-01A-12R-A32O-07	TCGA-OE-A75W	TCGA-OE-A75W-01A	TP	Primary solid Tumor	TCGA-OE-A75W-01A	1	Not Reported	22f07eee-f10e-401d-b311-42a62d1a25ad	Primary Tumor	Not Reported	49	released	200	NA	D0E49643-BAB9-42A7-86AE-46BE5EF4BD0C	TCGA-OE-A75W	NA	TRUE	NA	FALSE	Not Reported	No	Stage IIA	0	not reported	Tail of pancreas	110	27684	Infiltrating duct carcinoma, NOS	no	2013	No	7th	T3	2000-03-01	N0	M0	not reported	15c3b31f-0776-5bd7-8bf8-7328c88095f4	C25.2	Tail of pancreas	not reported	not reported	1.64384	Yes	c165c053-a32f-5ca3-9205-4db0d51dbc88	20	30
TCGA-US-A77G-01A-11R-A32O-07	TCGA-US-A77G-01A-11R-A32O-07	TCGA-US-A77G	TCGA-US-A77G-01A	TP	Primary solid Tumor	TCGA-US-A77G-01A	1	Not Reported	f3934354-76f8-4506-9943-53d5f9d8dd0c	Primary Tumor	Not Reported	1077	released	150	NA	FB498A85-B151-4963-BA96-A5BF955310C0	TCGA-US-A77G	NA	TRUE	NA	FALSE	Not Reported	No	Stage IIB	0	not reported	Head of pancreas	NA	23443	Infiltrating duct carcinoma, NOS	no	2010	No	7th	T3	2000-03-01	N1	MX	not reported	8b12fc3b-aaf4-5598-8ddc-c3d6b0d1443b	C25.0	Head of pancreas	not reported	not reported	NA	Yes	05866b18-d818-5332-afc5-bb5d9461e20b	NA	NA
TCGA-HZ-A77P-01A-11R-A33R-07	TCGA-HZ-A77P-01A-11R-A33R-07	TCGA-HZ-A77P	TCGA-HZ-A77P-01A	TP	Primary solid Tumor	TCGA-HZ-A77P-01A	1	Not Reported	2f600885-e2f7-4bf1-b0e2-f00138a17b74	Primary Tumor	Not Reported	84	released	50	NA	71CF594D-2A24-4B98-AF3F-1D97DF421433	TCGA-HZ-A77P	NA	TRUE	NA	FALSE	Not Reported	No	Stage IIB	0	not reported	Head of pancreas	330	28403	Adenocarcinoma, NOS	no	2013	No	7th	T3	1940-03-01	N1	MX	not reported	afb57d97-75a8-59f5-9421-057f52e3bd4d	C25.0	Head of pancreas	not reported	not reported	NA	No	818575bb-1ad7-5766-bf5b-66bd358a6a57	NA	NA
TCGA-HZ-8001-01A-11R-2204-07	TCGA-HZ-8001-01A-11R-2204-07	TCGA-HZ-8001	TCGA-HZ-8001-01A	TP	Primary solid Tumor	TCGA-HZ-8001-01A	1	Not Reported	c7324845-a124-4db8-8236-d8caccb7fb39	Primary Tumor	Not Reported	NA	released	NA	0.9	21a86c40-57a8-43bf-a16e-ebaf0205f33a	TCGA-HZ-8001	0.5	NA	0.9	FALSE	Not Reported	No	Stage III	0	not reported	Head of pancreas	706	25227	Infiltrating duct carcinoma, NOS	no	2011	No	7th	T4	2000-03-01	N0	MX	not reported	b04d45f4-1142-5e0b-b797-bdbcb620e2f9	C25.0	Head of pancreas	not reported	not reported	NA	Not Reported	d9cabdac-f037-5638-9f25-06a29ffe913a	NA	NA
TCGA-IB-A5ST-01A-11R-A32O-07	TCGA-IB-A5ST-01A-11R-A32O-07	TCGA-IB-A5ST	TCGA-IB-A5ST-01A	TP	Primary solid Tumor	TCGA-IB-A5ST-01A	1	Not Reported	08fc3507-8072-4fbb-a39e-46b0d51ba8d0	Primary Tumor	Not Reported	103	released	790	NA	DB6AF92C-6929-41F6-A40F-4CA1C40F2A30	TCGA-IB-A5ST	NA	TRUE	NA	FALSE	Not Reported	No	Stage IIB	0	not reported	Head of pancreas	635	23672	Infiltrating duct carcinoma, NOS	no	2012	No	7th	T3	2000-03-01	N1	M0	not reported	7477b48a-b339-56c7-bb57-46b90004d8e1	C25.0	Head of pancreas	not reported	not reported	NA	No	621bde4c-a972-595a-8b2b-385ce7e92937	NA	NA
TCGA-XD-AAUL-01A-21R-A39D-07	TCGA-XD-AAUL-01A-21R-A39D-07	TCGA-XD-AAUL	TCGA-XD-AAUL-01A	TP	Primary solid Tumor	TCGA-XD-AAUL-01A	1	Not Reported	eefa10e3-1267-41ba-8207-794ce650dcd1	Primary Tumor	Not Reported	47	released	540	NA	2DC14AE7-6151-4B3F-83A5-A1EA6C827EF8	TCGA-XD-AAUL	NA	TRUE	NA	FALSE	Not Reported	No	Stage IIA	0	not reported	Head of pancreas	498	20607	Infiltrating duct carcinoma, NOS	yes	2013	No	7th	T3	2000-03-01	N0	MX	not reported	98f1a52a-0725-506a-9fa3-ef818a74f0a7	C25.0	Head of pancreas	not reported	not reported	1.64384	Yes	1c3b6163-9f25-5042-8d66-a5531ef68a85	NA	30
TCGA-HZ-7922-01A-11R-2156-07	TCGA-HZ-7922-01A-11R-2156-07	TCGA-HZ-7922	TCGA-HZ-7922-01A	TP	Primary solid Tumor	TCGA-HZ-7922-01A	1	Not Reported	81aaadaa-4427-4fcd-901d-31e5e52e344d	Primary Tumor	Not Reported	NA	released	NA	0.8	ed3ac19f-71d5-4a89-88a0-ada849f22e7c	TCGA-HZ-7922	0.4	NA	0.9	FALSE	Not Reported	No	Stage IIB	0	not reported	Head of pancreas	4	22413	Infiltrating duct carcinoma, NOS	no	2011	No	7th	T3	2000-03-01	N1	MX	not reported	f88b884a-c166-5029-9f1b-5bd29d2bf21c	C25.0	Head of pancreas	not reported	not reported	NA	No	11b4ee23-7a25-57c7-8b7f-c2719d7fc2b6	NA	NA
TCGA-2J-AAB6-01A-11R-A41B-07	TCGA-2J-AAB6-01A-11R-A41B-07	TCGA-2J-AAB6	TCGA-2J-AAB6-01A	TP	Primary solid Tumor	TCGA-2J-AAB6-01A	1	Not Reported	75099a24-6487-4556-8893-249eb02e8c87	Primary Tumor	Not Reported	707	released	70	NA	1FE3683C-294A-4FC5-A3F7-7DE1EFEFF11A	TCGA-2J-AAB6	NA	TRUE	NA	FALSE	Not Reported	No	Stage IIA	0	not reported	Body of pancreas	NA	27600	Infiltrating duct carcinoma, NOS	no	2012	No	7th	T3	2000-03-01	N0	M0	not reported	7abe8c27-ace0-5243-99de-2289373a087e	C25.1	Body of pancreas	not reported	not reported	NA	No	cb801ec4-37fb-598f-bc8f-1ba57d0a26f7	NA	NA
TCGA-H6-A45N-11A-12R-A26U-07	TCGA-H6-A45N-11A-12R-A26U-07	TCGA-H6-A45N	TCGA-H6-A45N-11A	NT	Solid Tissue Normal	TCGA-H6-A45N-11A	11	Not Reported	a00c5af8-5504-46a0-9acc-b32190dbac10	Solid Tissue Normal	Not Reported	203	released	880	NA	NA	TCGA-H6-A45N	NA	FALSE	NA	FALSE	Not Reported	No	Stage IIB	0	not reported	Tail of pancreas	233	32475	Adenocarcinoma, NOS	yes	2012	No	7th	T3	1940-03-01	N1	MX	not reported	5aa7eda8-f34e-5adc-a35d-dcb424b579f3	C25.2	Tail of pancreas	not reported	not reported	0.0547945	Yes	8ed10d5f-eeb3-5561-9fd1-1ccd3e445cad	NA	1
TCGA-H6-A45N-01A-11R-A26U-07	TCGA-H6-A45N-01A-11R-A26U-07	TCGA-H6-A45N	TCGA-H6-A45N-01A	TP	Primary solid Tumor	TCGA-H6-A45N-01A	1	Not Reported	4f770870-6974-4fa2-a4a9-aa6ce786dafe	Primary Tumor	Not Reported	203	released	470	NA	1E62D739-C4E6-4A3D-AB24-FA4DE1E2F992	TCGA-H6-A45N	NA	FALSE	NA	FALSE	Not Reported	No	Stage IIB	0	not reported	Tail of pancreas	233	32475	Adenocarcinoma, NOS	yes	2012	No	7th	T3	1940-03-01	N1	MX	not reported	5aa7eda8-f34e-5adc-a35d-dcb424b579f3	C25.2	Tail of pancreas	not reported	not reported	0.0547945	Yes	8ed10d5f-eeb3-5561-9fd1-1ccd3e445cad	NA	1
TCGA-2J-AABF-01A-31R-A41B-07	TCGA-2J-AABF-01A-31R-A41B-07	TCGA-2J-AABF	TCGA-2J-AABF-01A	TP	Primary solid Tumor	TCGA-2J-AABF-01A	1	Not Reported	22b8698c-d821-4d97-b4c8-23607b4cabc9	Primary Tumor	Not Reported	510	released	230	NA	2482DBEA-2835-47AE-AD61-D53B6BB11271	TCGA-2J-AABF	NA	TRUE	NA	FALSE	Not Reported	No	Stage IIB	0	not reported	Head of pancreas	NA	26936	Infiltrating duct carcinoma, NOS	no	2012	No	7th	T3	2000-03-01	N1	M0	not reported	44cf66d3-b141-5cfe-afa7-2f9b8efa53ee	C25.0	Head of pancreas	not reported	not reported	0.410959	Yes	ecf9ae0b-3122-5b61-9573-ed67d2faac34	5	7.5
TCGA-HZ-A49I-01A-12R-A26U-07	TCGA-HZ-A49I-01A-12R-A26U-07	TCGA-HZ-A49I	TCGA-HZ-A49I-01A	TP	Primary solid Tumor	TCGA-HZ-A49I-01A	1	Not Reported	81f10e63-73e0-4c07-be8b-b8c6d163b9ad	Primary Tumor	Not Reported	17	released	80	NA	8A955296-DAF7-48EE-8368-CEC37A796D1D	TCGA-HZ-A49I	NA	FALSE	NA	FALSE	Not Reported	No	Stage IIB	0	not reported	Head of pancreas	0	28454	Infiltrating duct carcinoma, NOS	no	2012	No	7th	T3	2000-03-01	N1	MX	not reported	c1671ce9-6433-5101-b386-451e30f2d044	C25.0	Head of pancreas	not reported	not reported	NA	No	961af036-038a-5c3a-842b-8e14b315f861	NA	NA
TCGA-F2-A7TX-01A-33R-A38C-07	TCGA-F2-A7TX-01A-33R-A38C-07	TCGA-F2-A7TX	TCGA-F2-A7TX-01A	TP	Primary solid Tumor	TCGA-F2-A7TX-01A	1	Not Reported	185c0c7e-b148-43f0-8d44-c7508dba85dd	Primary Tumor	Not Reported	142	released	230	NA	DA05A8C3-0968-4405-9C62-E65B8C167AD1	TCGA-F2-A7TX	NA	FALSE	NA	FALSE	Not Reported	No	Stage IIB	0	not reported	Head of pancreas	NA	28239	Infiltrating duct carcinoma, NOS	no	2013	No	7th	T3	2000-03-01	N1	M0	not reported	9572d17f-c7a5-549b-b3c9-a93a69fb561e	C25.0	Head of pancreas	not reported	not reported	NA	Yes	7c63f980-f7c7-5263-b537-65b808e48a1d	NA	NA
TCGA-IB-7889-01A-11R-2156-07	TCGA-IB-7889-01A-11R-2156-07	TCGA-IB-7889	TCGA-IB-7889-01A	TP	Primary solid Tumor	TCGA-IB-7889-01A	1	Not Reported	8f23878e-87bb-4d34-a566-4b2d4999f1e6	Primary Tumor	Not Reported	NA	released	NA	0.3	eca003d0-d6e7-4a93-9944-f4fdf6361f74	TCGA-IB-7889	0.3	NA	0.8	FALSE	Not Reported	No	Stage IIB	0	not reported	Pancreas, NOS	NA	31393	Infiltrating duct carcinoma, NOS	no	2011	No	7th	T3	2000-03-01	N1	M0	not reported	63221bfc-98cc-552a-96e8-5d91291ca52f	C25.9	Pancreas, NOS	not reported	not reported	NA	No	edf9c513-bd36-5b15-b739-143450a77709	NA	NA
TCGA-HZ-7926-01A-11R-2156-07	TCGA-HZ-7926-01A-11R-2156-07	TCGA-HZ-7926	TCGA-HZ-7926-01A	TP	Primary solid Tumor	TCGA-HZ-7926-01A	1	Not Reported	4f54b5f4-61f6-4102-9f6d-0f5e3dfe090c	Primary Tumor	Not Reported	NA	released	NA	1	f592ecc6-667a-41fb-b56a-9a860a016130	TCGA-HZ-7926	0.3	NA	1.2	FALSE	Not Reported	No	Stage IIB	0	not reported	Head of pancreas	8	21024	Infiltrating duct carcinoma, NOS	no	2011	No	7th	T3	2000-03-01	N1	MX	not reported	f172c483-6888-5e06-9e5c-0b2bb4be64dd	C25.0	Head of pancreas	not reported	not reported	NA	No	1dc7b06f-a226-5ca7-9258-9e2d404c580b	NA	NA
TCGA-FB-A5VM-01A-11R-A32O-07	TCGA-FB-A5VM-01A-11R-A32O-07	TCGA-FB-A5VM	TCGA-FB-A5VM-01A	TP	Primary solid Tumor	TCGA-FB-A5VM-01A	1	Not Reported	3bc32bf5-8f81-4c93-8333-4c43a4f6f6c0	Primary Tumor	Not Reported	91	released	280	NA	B3695BB7-243C-4A87-B8A3-70F45ECAFDDA	TCGA-FB-A5VM	NA	TRUE	NA	FALSE	Not Reported	No	Stage IB	0	not reported	Head of pancreas	449	27362	Infiltrating duct carcinoma, NOS	no	2012	No	7th	T2	2000-03-01	N0	M0	not reported	c093418c-3379-5f81-8a28-33de6741c3a3	C25.0	Head of pancreas	not reported	not reported	1.31507	Yes	35e4e07d-c553-50ac-b0a4-37747ff783bf	47	24
TCGA-FB-AAPS-01A-12R-A39D-07	TCGA-FB-AAPS-01A-12R-A39D-07	TCGA-FB-AAPS	TCGA-FB-AAPS-01A	TP	Primary solid Tumor	TCGA-FB-AAPS-01A	1	Not Reported	0dd80160-fc7e-4162-b744-32474bb7223e	Primary Tumor	Not Reported	2035	released	90	NA	0369BABC-3B58-4386-9CF6-71889B1F651B	TCGA-FB-AAPS	NA	TRUE	NA	FALSE	Not Reported	No	Stage IIB	0	not reported	Head of pancreas	228	22981	Infiltrating duct carcinoma, NOS	no	2008	No	7th	T2	2000-03-01	N1	MX	not reported	7ccc058f-a131-5802-8228-cf571ab031db	C25.0	Head of pancreas	not reported	not reported	0.547945	No	41130560-9922-5796-8a63-a93d1cddfc14	10	10
TCGA-HV-A5A6-01A-11R-A26U-07	TCGA-HV-A5A6-01A-11R-A26U-07	TCGA-HV-A5A6	TCGA-HV-A5A6-01A	TP	Primary solid Tumor	TCGA-HV-A5A6-01A	1	Not Reported	c83bed5c-c690-49b6-bee6-6dacf0f3db91	Primary Tumor	Not Reported	4142	released	130	NA	6C6BDA2E-3A76-4EEB-99FB-6D1C4B8D5DBF	TCGA-HV-A5A6	NA	FALSE	NA	FALSE	Not Reported	No	Stage IIB	0	not reported	Head of pancreas	1953	24025	Infiltrating duct carcinoma, NOS	no	2001	No	7th	T3	2000-03-01	N1b	M0	not reported	be5f625f-debc-540d-aacb-533d1eb591d3	C25.0	Head of pancreas	not reported	not reported	NA	Not Reported	c034bea3-e18a-563d-8e51-da94d53b4717	NA	NA
TCGA-IB-8126-01A-11R-2404-07	TCGA-IB-8126-01A-11R-2404-07	TCGA-IB-8126	TCGA-IB-8126-01A	TP	Primary solid Tumor	TCGA-IB-8126-01A	1	Not Reported	45d9fddd-e70d-469b-bb04-f7c2492fe495	Primary Tumor	Not Reported	NA	released	NA	0.5	165130cb-6c48-4016-9519-f86c563bba30	TCGA-IB-8126	0.2	NA	1.5	FALSE	Not Reported	No	Stage III	0	not reported	Head of pancreas	462	29213	Infiltrating duct carcinoma, NOS	no	2011	No	7th	T4	2000-03-01	N1	M0	not reported	a0a7b857-c6ef-51f2-a1e9-e6736b66724b	C25.0	Head of pancreas	not reported	not reported	0.219178	Yes	2562e3ff-d5ae-5d5d-8814-0fb073d9e44f	4	4
TCGA-2J-AAB8-01A-12R-A41B-07	TCGA-2J-AAB8-01A-12R-A41B-07	TCGA-2J-AAB8	TCGA-2J-AAB8-01A	TP	Primary solid Tumor	TCGA-2J-AAB8-01A	1	Not Reported	5f27b568-aa1b-4720-a176-f4a8c3fe7e40	Primary Tumor	Not Reported	688	released	170	NA	831D9770-7EA3-49F7-9984-27930F239A34	TCGA-2J-AAB8	NA	TRUE	NA	FALSE	Not Reported	No	Stage IIB	0	not reported	Head of pancreas	80	26028	Infiltrating duct carcinoma, NOS	no	2012	No	7th	T3	2000-03-01	N1	M0	not reported	658ba930-b219-5d82-96ec-90636606c8cc	C25.0	Head of pancreas	not reported	not reported	NA	No	bd29488e-66eb-5c8d-b313-fa7bfce9a55b	NA	NA
TCGA-HZ-7289-01A-11R-2156-07	TCGA-HZ-7289-01A-11R-2156-07	TCGA-HZ-7289	TCGA-HZ-7289-01A	TP	Primary solid Tumor	TCGA-HZ-7289-01A	1	Not Reported	7b73904d-821e-440b-9022-eedaa18f146d	Primary Tumor	Not Reported	NA	released	NA	0.2	477a4b9a-9bb9-42f5-9f96-1848974bb3ac	TCGA-HZ-7289	0.2	NA	0.4	FALSE	Not Reported	No	Stage IIB	0	not reported	Head of pancreas	240	28174	Adenocarcinoma, NOS	yes	2010	No	7th	T3	1940-03-01	N1	MX	not reported	ff375fe5-1604-58ac-873e-66b853661601	C25.0	Head of pancreas	not reported	not reported	NA	No	ea902f8e-aeda-543e-ba9e-a816bb8fe09e	NA	NA
TCGA-FB-A78T-01A-12R-A32O-07	TCGA-FB-A78T-01A-12R-A32O-07	TCGA-FB-A78T	TCGA-FB-A78T-01A	TP	Primary solid Tumor	TCGA-FB-A78T-01A	1	Not Reported	49ba3a06-3a17-4675-925c-75eb461fbdbe	Primary Tumor	Not Reported	101	released	140	NA	E78A8131-436B-4A9B-8F28-986EAD34516D	TCGA-FB-A78T	NA	TRUE	NA	FALSE	Not Reported	No	Stage IIB	0	not reported	Head of pancreas	1	26179	Infiltrating duct carcinoma, NOS	no	2013	No	7th	T3	2000-03-01	N1	M0	not reported	30ffc4e7-3430-56a8-ae96-5c7d08e99bec	C25.0	Head of pancreas	not reported	not reported	0.109589	No	7a7c3a96-7080-5ebf-8a0f-3dde0db7c25c	20	2
TCGA-IB-AAUW-01A-12R-A38C-07	TCGA-IB-AAUW-01A-12R-A38C-07	TCGA-IB-AAUW	TCGA-IB-AAUW-01A	TP	Primary solid Tumor	TCGA-IB-AAUW-01A	1	Not Reported	73caa9fe-4293-4a71-9534-0d5adce937c1	Primary Tumor	Not Reported	13	released	290	NA	64606B7A-008D-459F-8E32-296016364BB1	TCGA-IB-AAUW	NA	TRUE	NA	FALSE	Not Reported	No	Stage IIB	0	not reported	Head of pancreas	179	23306	Infiltrating duct carcinoma, NOS	no	2013	No	7th	T3	2000-03-01	N1	M0	not reported	2e22a202-59b0-51b0-a20c-c3b91bd0c926	C25.0	Head of pancreas	not reported	not reported	NA	Yes	9b192d7c-61ea-5eef-8bb0-15a960b51f48	NA	NA
TCGA-HZ-7919-01A-11R-2156-07	TCGA-HZ-7919-01A-11R-2156-07	TCGA-HZ-7919	TCGA-HZ-7919-01A	TP	Primary solid Tumor	TCGA-HZ-7919-01A	1	Not Reported	8b70f409-f05a-4518-8bb1-8e8a07aab572	Primary Tumor	Not Reported	NA	released	NA	0.6	db1515c4-e01d-4265-8664-17683c2689a9	TCGA-HZ-7919	0.3	NA	1.3	FALSE	Not Reported	No	Stage IIB	0	not reported	Head of pancreas	20	19064	Infiltrating duct carcinoma, NOS	no	2011	No	7th	T3	2000-03-01	N1	M0	not reported	6536da70-ea68-53c7-a530-8a426bc84e08	C25.0	Head of pancreas	not reported	not reported	NA	No	fd28b0b1-2cb9-5cfd-817f-a81acae563d0	NA	NA
TCGA-IB-7888-01A-11R-2156-07	TCGA-IB-7888-01A-11R-2156-07	TCGA-IB-7888	TCGA-IB-7888-01A	TP	Primary solid Tumor	TCGA-IB-7888-01A	1	Not Reported	a9f2a8e7-680c-4a24-a7cc-a67d50b746f3	Primary Tumor	Not Reported	NA	released	NA	0.7	29a3f9c4-e362-45e2-ad2a-048b23c362f7	TCGA-IB-7888	0.3	NA	2.1	FALSE	Not Reported	No	Stage IIA	0	not reported	Pancreas, NOS	NA	24117	Infiltrating duct carcinoma, NOS	no	2008	No	6th	T3	2000-03-01	N0	M0	not reported	7f364e92-505d-569f-bf26-b620a41a406e	C25.9	Pancreas, NOS	not reported	not reported	NA	No	e8af5af2-513a-598f-93cf-80bb1a96c26e	NA	NA
TCGA-3A-A9IZ-01A-12R-A41B-07	TCGA-3A-A9IZ-01A-12R-A41B-07	TCGA-3A-A9IZ	TCGA-3A-A9IZ-01A	TP	Primary solid Tumor	TCGA-3A-A9IZ-01A	1	Not Reported	9434a114-6fb9-421e-af9e-5d71ee6b28c7	Primary Tumor	Not Reported	574	released	120	NA	F6EEF42B-567E-4B13-A155-AD8DDFF9A0C6	TCGA-3A-A9IZ	NA	TRUE	NA	FALSE	Not Reported	No	Stage IIB	0	not reported	Head of pancreas	NA	17294	Infiltrating duct carcinoma, NOS	no	2012	No	7th	T3	2000-03-01	N1	MX	not reported	a20100d8-3375-5643-9113-d25a07acba42	C25.0	Head of pancreas	not reported	not reported	NA	No	f61b28ac-e3ad-5e02-b276-c1b071f96d9f	NA	NA
TCGA-IB-AAUV-01A-11R-A38C-07	TCGA-IB-AAUV-01A-11R-A38C-07	TCGA-IB-AAUV	TCGA-IB-AAUV-01A	TP	Primary solid Tumor	TCGA-IB-AAUV-01A	1	Not Reported	3dfda380-23d2-42b5-bc4d-a76784f12b55	Primary Tumor	Not Reported	113	released	200	NA	3B060A4A-5A3D-4167-81B5-60C09D1769A8	TCGA-IB-AAUV	NA	TRUE	NA	FALSE	Not Reported	No	Stage IIB	0	not reported	Head of pancreas	404	18059	Infiltrating duct carcinoma, NOS	no	2013	No	7th	T3	2000-03-01	N1	M0	not reported	d9c29269-e91d-53ef-9708-d95744e65c65	C25.0	Head of pancreas	not reported	not reported	2.73973	Yes	bbac784a-b88c-57cc-98d1-9bfb874433a2	NA	50
TCGA-F2-A8YN-01A-11R-A37L-07	TCGA-F2-A8YN-01A-11R-A37L-07	TCGA-F2-A8YN	TCGA-F2-A8YN-01A	TP	Primary solid Tumor	TCGA-F2-A8YN-01A	1	Not Reported	7cb347e0-f24c-4d2b-a1d5-954dca867a36	Primary Tumor	Not Reported	112	released	410	NA	1929E429-7614-4B96-A4DA-D4E109F704B1	TCGA-F2-A8YN	NA	FALSE	NA	FALSE	Not Reported	No	Stage IIA	0	not reported	Head of pancreas	517	28047	Infiltrating duct carcinoma, NOS	no	2013	No	7th	T3	2000-03-01	N0	M0	not reported	ca52a866-49ae-517d-a214-90ceea5adcf6	C25.0	Head of pancreas	not reported	not reported	3.28767	Yes	a3fbb308-77e1-5420-bc1d-c714704ec265	NA	60
TCGA-3A-A9I7-01A-21R-A38C-07	TCGA-3A-A9I7-01A-21R-A38C-07	TCGA-3A-A9I7	TCGA-3A-A9I7-01A	TP	Primary solid Tumor	TCGA-3A-A9I7-01A	1	Not Reported	7df8b4b5-c5d8-4b49-b59a-8ec5271289b4	Primary Tumor	Not Reported	1212	released	90	NA	6D8DBB3D-111F-4A77-9611-7F5A85A5F11A	TCGA-3A-A9I7	NA	TRUE	NA	FALSE	Not Reported	No	Stage IIB	0	not reported	Head of pancreas	1323	16766	Infiltrating duct carcinoma, NOS	no	2010	No	7th	T3	2000-03-01	N1	MX	not reported	31932aaa-ebd0-526e-b0f3-99c7c1eba365	C25.0	Head of pancreas	not reported	not reported	NA	Yes	110e4065-9e06-52a9-9642-a6275a6846f0	NA	NA
TCGA-2J-AAB1-01A-11R-A41B-07	TCGA-2J-AAB1-01A-11R-A41B-07	TCGA-2J-AAB1	TCGA-2J-AAB1-01A	TP	Primary solid Tumor	TCGA-2J-AAB1-01A	1	Not Reported	b83d846d-1b92-430c-a98e-352fcd24c0ab	Primary Tumor	Not Reported	683	released	90	NA	224801AA-21C4-4070-B1FE-BAE31CC38318	TCGA-2J-AAB1	NA	TRUE	NA	FALSE	Not Reported	No	Stage IIB	0	not reported	Head of pancreas	NA	23962	Mucinous adenocarcinoma	no	2012	No	7th	T3	1980-03-01	N1	M0	not reported	21155825-1b99-5995-9d6f-79e054434cf1	C25.0	Head of pancreas	not reported	not reported	1.36986	Yes	69cfae52-cef7-57f1-9cf0-06ae55c0a1a8	26	25
TCGA-RB-A7B8-01A-12R-A33R-07	TCGA-RB-A7B8-01A-12R-A33R-07	TCGA-RB-A7B8	TCGA-RB-A7B8-01A	TP	Primary solid Tumor	TCGA-RB-A7B8-01A	1	Not Reported	e757d776-991c-47f2-8c8b-fe2c27c34133	Primary Tumor	Not Reported	84	released	320	NA	F63EAC42-1415-4F1F-B647-C9D61A2EB8C3	TCGA-RB-A7B8	NA	TRUE	NA	FALSE	Not Reported	No	Stage IIB	0	not reported	Head of pancreas	36	29585	Adenocarcinoma with mixed subtypes	no	2013	No	7th	T3	1955-03-01	N1	MX	not reported	f95c4d80-71c8-5865-898f-08ffca9adea9	C25.0	Head of pancreas	not reported	not reported	NA	Yes	4983e988-a030-52b1-80fc-57469411176c	NA	NA
TCGA-HZ-A49G-01A-11R-A26U-07	TCGA-HZ-A49G-01A-11R-A26U-07	TCGA-HZ-A49G	TCGA-HZ-A49G-01A	TP	Primary solid Tumor	TCGA-HZ-A49G-01A	1	Not Reported	2b44f6c8-ec16-46b7-a810-622cb0dec3c5	Primary Tumor	Not Reported	66	released	70	NA	B4B072E1-3592-4EBA-A4A4-F8AA591A2FFE	TCGA-HZ-A49G	NA	FALSE	NA	FALSE	Not Reported	No	Stage IIB	0	not reported	Head of pancreas	660	21491	Infiltrating duct carcinoma, NOS	no	2012	No	7th	T2	2000-03-01	N1	MX	not reported	94d51d39-7ed8-5406-a473-3b319a34501e	C25.0	Head of pancreas	not reported	not reported	NA	No	8ab15b2c-3542-5133-a18a-c77a96a0fdfc	NA	NA
TCGA-3A-A9IR-01A-11R-A38C-07	TCGA-3A-A9IR-01A-11R-A38C-07	TCGA-3A-A9IR	TCGA-3A-A9IR-01A	TP	Primary solid Tumor	TCGA-3A-A9IR-01A	1	Not Reported	77a1e6a7-df34-4a3b-bb32-af197c26071f	Primary Tumor	Not Reported	1268	released	50	NA	10A8287B-4A3C-4A13-B4D9-8E3894008ACF	TCGA-3A-A9IR	NA	TRUE	NA	FALSE	Not Reported	No	Stage IB	0	not reported	Tail of pancreas	1542	23406	Neuroendocrine carcinoma, NOS	no	2010	No	7th	T2	1946-03-01	N0	MX	not reported	236a3ee4-ebc8-50de-8f95-67fc1c02e6e9	C25.2	Tail of pancreas	not reported	not reported	NA	Yes	5f87cbcb-3547-5fcb-9fe6-b77ceb475154	15	NA
TCGA-HZ-A8P0-01A-11R-A36G-07	TCGA-HZ-A8P0-01A-11R-A36G-07	TCGA-HZ-A8P0	TCGA-HZ-A8P0-01A	TP	Primary solid Tumor	TCGA-HZ-A8P0-01A	1	Not Reported	e15258dc-ef34-407b-b23d-f5b242a95d6d	Primary Tumor	Not Reported	52	released	50	NA	8D96A131-D451-4057-BDA6-2652DB076538	TCGA-HZ-A8P0	NA	FALSE	NA	FALSE	Not Reported	No	Stage IIB	0	not reported	Head of pancreas	0	27850	Infiltrating duct carcinoma, NOS	yes	2013	No	7th	T3	2000-03-01	N1	MX	not reported	4d0e8732-bec8-5aad-be4b-f30de3b05c01	C25.0	Head of pancreas	not reported	not reported	1.09589	Yes	10bce2b7-d91c-578e-986a-57530477c8a8	20	20
TCGA-3A-A9I5-01A-11R-A38C-07	TCGA-3A-A9I5-01A-11R-A38C-07	TCGA-3A-A9I5	TCGA-3A-A9I5-01A	TP	Primary solid Tumor	TCGA-3A-A9I5-01A	1	Not Reported	d005da54-bdfc-433d-a661-b71b6c19b91c	Primary Tumor	Not Reported	1492	released	60	NA	3F27C6DB-101D-4522-9C7D-23B7DD54ADCB	TCGA-3A-A9I5	NA	TRUE	NA	FALSE	Not Reported	No	NA	0	not reported	Head of pancreas	1794	21175	Infiltrating duct carcinoma, NOS	yes	2009	No	6th	NA	2000-03-01	N0	MX	not reported	e05953e9-460f-515f-bef0-6911a96dff45	C25.0	Head of pancreas	not reported	not reported	NA	No	20b7a0dd-7285-5a82-8d40-e6b63e7ad33c	NA	NA
TCGA-3A-A9IC-01A-11R-A38C-07	TCGA-3A-A9IC-01A-11R-A38C-07	TCGA-3A-A9IC	TCGA-3A-A9IC-01A	TP	Primary solid Tumor	TCGA-3A-A9IC-01A	1	Not Reported	6d821228-fed7-4437-92ad-49dcc159accd	Primary Tumor	Not Reported	1015	released	60	NA	74597CF2-71A6-4F3A-91E5-F22FD31D4417	TCGA-3A-A9IC	NA	TRUE	NA	FALSE	Not Reported	No	Stage IIB	0	not reported	Head of pancreas	NA	22400	Infiltrating duct carcinoma, NOS	no	2011	No	7th	T3	2000-03-01	N1	MX	not reported	30933442-8488-53bd-8540-b33d4e67ae58	C25.0	Head of pancreas	not reported	not reported	NA	Yes	f5ea94f0-a4a8-58db-ac71-2e79022c621e	NA	NA
TCGA-XD-AAUI-01A-42R-A41B-07	TCGA-XD-AAUI-01A-42R-A41B-07	TCGA-XD-AAUI	TCGA-XD-AAUI-01A	TP	Primary solid Tumor	TCGA-XD-AAUI-01A	1	Not Reported	70cb6430-fd59-4210-b81c-642d6c2b9216	Primary Tumor	Not Reported	63	released	1550	NA	E5956422-823C-45DD-B365-1E11E53BC495	TCGA-XD-AAUI	NA	TRUE	NA	FALSE	Not Reported	No	Stage IIB	0	not reported	Head of pancreas	202	18607	Infiltrating duct carcinoma, NOS	no	2013	No	7th	T3	2000-03-01	N1	MX	not reported	87ee030e-d029-5f7d-a506-016c6252560a	C25.0	Head of pancreas	not reported	not reported	NA	Yes	5fe54d17-7695-56aa-b415-a8039d6833a5	NA	NA
TCGA-IB-AAUU-01A-11R-A37L-07	TCGA-IB-AAUU-01A-11R-A37L-07	TCGA-IB-AAUU	TCGA-IB-AAUU-01A	TP	Primary solid Tumor	TCGA-IB-AAUU-01A	1	Not Reported	c4340082-347a-41e6-a135-3f5f82973de2	Primary Tumor	Not Reported	16	released	130	NA	92A95964-6584-4BB6-BBC1-B6B2F2A89B05	TCGA-IB-AAUU	NA	TRUE	NA	FALSE	Not Reported	No	Stage IIB	0	not reported	Head of pancreas	245	13127	Infiltrating duct carcinoma, NOS	no	2013	No	7th	T3	2000-03-01	N1	M0	not reported	0589952a-86a5-57c2-9c35-32d0241eefd7	C25.0	Head of pancreas	not reported	not reported	0.821918	Yes	ee8dc57b-c1c8-51e7-8bcb-fef3635a6609	NA	15
TCGA-2J-AABI-01A-12R-A41B-07	TCGA-2J-AABI-01A-12R-A41B-07	TCGA-2J-AABI	TCGA-2J-AABI-01A	TP	Primary solid Tumor	TCGA-2J-AABI-01A	1	Not Reported	5a7a09f6-7901-406d-b393-0885b3e81e92	Primary Tumor	Not Reported	774	released	90	NA	F0521573-7B87-4E0E-AA23-4B49466E8BAA	TCGA-2J-AABI	NA	TRUE	NA	FALSE	Not Reported	No	Stage IIA	0	not reported	Head of pancreas	969	20316	Adenocarcinoma, NOS	no	2011	No	7th	T3	1940-03-01	N0	M0	not reported	f0b42198-d412-5930-a5cb-007e08c4450a	C25.0	Head of pancreas	not reported	not reported	2.30137	Yes	13d92a39-538e-5f33-8643-26b3bf5b1196	31	42
TCGA-F2-A44G-01A-11R-A26U-07	TCGA-F2-A44G-01A-11R-A26U-07	TCGA-F2-A44G	TCGA-F2-A44G-01A	TP	Primary solid Tumor	TCGA-F2-A44G-01A	1	Not Reported	04eb5d4f-8fb2-465e-91e8-29c881679e34	Primary Tumor	Not Reported	105	released	330	NA	65B052FE-569F-462F-881C-1AC795F9CC61	TCGA-F2-A44G	NA	FALSE	NA	FALSE	Not Reported	No	Stage IIB	0	not reported	Head of pancreas	153	29150	Adenocarcinoma, NOS	yes	2012	No	7th	T3	1940-03-01	N1	M0	not reported	6f854f4d-50b3-58f8-8719-adb7dee20057	C25.0	Head of pancreas	not reported	not reported	NA	Yes	4ff4a671-9cc0-5de3-bdf6-cde487d803fa	NA	NA
TCGA-2J-AAB4-01A-12R-A41B-07	TCGA-2J-AAB4-01A-12R-A41B-07	TCGA-2J-AAB4	TCGA-2J-AAB4-01A	TP	Primary solid Tumor	TCGA-2J-AAB4-01A	1	Not Reported	19110fc3-9693-4b22-ad08-3c06bcb33470	Primary Tumor	Not Reported	713	released	160	NA	A59BDECC-6076-4035-A359-EED94BBF3C95	TCGA-2J-AAB4	NA	TRUE	NA	FALSE	Not Reported	No	Stage IIB	0	not reported	Overlapping lesion of pancreas	729	17794	Adenocarcinoma, NOS	no	2012	No	7th	T2	1940-03-01	N1	M0	not reported	a2a80876-193c-5241-a6d8-fb6f46ff1f8a	C25.8	Overlapping lesion of pancreas	not reported	not reported	NA	No	b598fb79-169b-5dd6-8ea5-c7207ba489ab	NA	NA
TCGA-IB-7652-01A-11R-2156-07	TCGA-IB-7652-01A-11R-2156-07	TCGA-IB-7652	TCGA-IB-7652-01A	TP	Primary solid Tumor	TCGA-IB-7652-01A	1	Not Reported	44402829-f01a-49bb-bcd0-fd5455e7d50b	Primary Tumor	Not Reported	NA	released	NA	0.8	9533f051-c038-415d-952e-20314d097e13	TCGA-IB-7652	0.3	NA	1	FALSE	Not Reported	No	Stage IIB	0	not reported	Pancreas, NOS	1116	18129	Infiltrating duct carcinoma, NOS	no	2011	No	7th	T3	2000-03-01	N1	M0	not reported	c0d780f5-f315-57db-aaed-e43a4b35cb22	C25.9	Pancreas, NOS	not reported	not reported	NA	Yes	d350c309-d5d8-5d46-94ce-47b5b3b1936d	NA	NA
TCGA-XN-A8T5-01A-12R-A36G-07	TCGA-XN-A8T5-01A-12R-A36G-07	TCGA-XN-A8T5	TCGA-XN-A8T5-01A	TP	Primary solid Tumor	TCGA-XN-A8T5-01A	1	Not Reported	d82393fe-49a4-4b96-aee2-6f75399ca315	Primary Tumor	Not Reported	334	released	110	NA	776C9B48-C11F-45B9-9C6B-4466306134DD	TCGA-XN-A8T5	NA	TRUE	NA	FALSE	Not Reported	No	Stage IB	0	not reported	Head of pancreas	720	19707	Infiltrating duct carcinoma, NOS	no	2012	No	7th	T2	2000-03-01	N0	M0	not reported	907d14fa-569a-5b71-8d08-bdb94a4f9185	C25.0	Head of pancreas	not reported	not reported	0.832877	No	0db6d34b-fbcd-5f10-a021-8693076de97e	NA	15.2
TCGA-HV-AA8X-01A-11R-A39D-07	TCGA-HV-AA8X-01A-11R-A39D-07	TCGA-HV-AA8X	TCGA-HV-AA8X-01A	TP	Primary solid Tumor	TCGA-HV-AA8X-01A	1	Not Reported	67a81b47-da7a-4bf5-b170-f7ed0551a903	Primary Tumor	Not Reported	57	released	10	NA	09F4014B-A548-44EE-AA6B-B855DC99A222	TCGA-HV-AA8X	NA	FALSE	NA	FALSE	Not Reported	No	Stage IIB	0	not reported	Body of pancreas	NA	27662	Infiltrating duct carcinoma, NOS	no	2013	No	7th	T2	2000-03-01	N1	MX	not reported	32439614-2305-5195-b301-28e8ef57cf11	C25.1	Body of pancreas	not reported	not reported	NA	No	a8d31c0e-44fa-5d63-b4dd-bc1a7f5f730e	NA	NA
TCGA-HZ-A49H-01A-11R-A26U-07	TCGA-HZ-A49H-01A-11R-A26U-07	TCGA-HZ-A49H	TCGA-HZ-A49H-01A	TP	Primary solid Tumor	TCGA-HZ-A49H-01A	1	Not Reported	af201816-3185-46af-b18e-8bbc777efdb9	Primary Tumor	Not Reported	46	released	70	NA	6F534DEF-868A-4F2C-8A57-E4F738B285DF	TCGA-HZ-A49H	NA	FALSE	NA	FALSE	Not Reported	No	Stage IIB	0	not reported	Head of pancreas	491	24891	Infiltrating duct carcinoma, NOS	no	2012	No	7th	T3	2000-03-01	N1	MX	not reported	0b52208d-1877-5a26-9d65-5123282cf939	C25.0	Head of pancreas	not reported	not reported	NA	No	5940e7ac-a7d7-5c41-8f44-136acb47f4c6	NA	NA
TCGA-IB-7644-01A-11R-2156-07	TCGA-IB-7644-01A-11R-2156-07	TCGA-IB-7644	TCGA-IB-7644-01A	TP	Primary solid Tumor	TCGA-IB-7644-01A	1	Not Reported	99aacbeb-6fab-4a80-a932-7f742427d563	Primary Tumor	Not Reported	NA	released	NA	0.3	edbd392f-eaca-4329-8abb-94a1315db088	TCGA-IB-7644	0.3	NA	1.3	FALSE	Not Reported	No	Stage IV	0	not reported	Head of pancreas	347	24043	Infiltrating duct carcinoma, NOS	no	2011	No	7th	T3	2000-03-01	N1	M1	not reported	122eaaac-d51e-5b4a-bdf7-32d93b45840b	C25.0	Head of pancreas	not reported	not reported	1.64384	Yes	7f320cfc-5968-5caa-9c73-885e6533d628	NA	30
TCGA-HV-A5A4-01A-11R-A26U-07	TCGA-HV-A5A4-01A-11R-A26U-07	TCGA-HV-A5A4	TCGA-HV-A5A4-01A	TP	Primary solid Tumor	TCGA-HV-A5A4-01A	1	Not Reported	b8465091-5505-4bc4-8c83-59ab36e7be13	Primary Tumor	Not Reported	219	released	30	NA	CC6BA3FE-519A-42AF-A414-46B18D654E68	TCGA-HV-A5A4	NA	FALSE	NA	FALSE	Not Reported	No	Stage IIA	0	not reported	Tail of pancreas	232	26311	Infiltrating duct carcinoma, NOS	no	2012	No	7th	T3	2000-03-01	N0	MX	not reported	ff6bf451-5e9d-59a0-b2e0-6034bf70c45d	C25.2	Tail of pancreas	not reported	not reported	NA	No	4857b49d-5fa4-5fd4-8fd7-7c758ce878d6	NA	NA
TCGA-IB-7897-01A-21R-2204-07	TCGA-IB-7897-01A-21R-2204-07	TCGA-IB-7897	TCGA-IB-7897-01A	TP	Primary solid Tumor	TCGA-IB-7897-01A	1	Not Reported	3af7b231-6638-498f-b778-cefb69b59968	Primary Tumor	Not Reported	NA	released	NA	0.4	4c894664-b029-462a-9ef2-a7c859a11272	TCGA-IB-7897	0.3	NA	1	FALSE	Not Reported	No	Stage IIB	0	not reported	Pancreas, NOS	NA	19718	Infiltrating duct carcinoma, NOS	no	2008	No	6th	T3	2000-03-01	N1	M0	not reported	12c51627-192a-5f84-b7e5-d05c096f6536	C25.9	Pancreas, NOS	not reported	not reported	NA	Yes	4c9af72b-a619-5b85-b746-ee6efabdf7d8	NA	NA
TCGA-HZ-8005-01A-11R-2204-07	TCGA-HZ-8005-01A-11R-2204-07	TCGA-HZ-8005	TCGA-HZ-8005-01A	TP	Primary solid Tumor	TCGA-HZ-8005-01A	1	Not Reported	6b58512c-bba6-4871-a98a-50078b88dcdb	Primary Tumor	Not Reported	NA	released	NA	0.7	866af8ee-52c6-48f2-a385-e3cad487c401	TCGA-HZ-8005	0.4	NA	1.2	FALSE	Not Reported	No	Stage IIB	0	not reported	Pancreas, NOS	NA	29674	Infiltrating duct carcinoma, NOS	no	2012	No	7th	T3	2000-03-01	N1	MX	not reported	3a750232-f737-5b44-8e63-4c98b3b02eba	C25.9	Pancreas, NOS	not reported	not reported	NA	Not Reported	20f75487-6d5c-51e1-a5fa-f48b2f7435a8	NA	NA
TCGA-HV-A7OL-01A-11R-A33R-07	TCGA-HV-A7OL-01A-11R-A33R-07	TCGA-HV-A7OL	TCGA-HV-A7OL-01A	TP	Primary solid Tumor	TCGA-HV-A7OL-01A	1	Not Reported	34154b8b-1867-432c-9eb4-9f55c76caa40	Primary Tumor	Not Reported	303	released	60	NA	ECB0A827-3335-497C-9A5C-352B2042CB98	TCGA-HV-A7OL	NA	FALSE	NA	FALSE	Not Reported	No	Stage IIA	0	not reported	Head of pancreas	252	25768	Infiltrating duct carcinoma, NOS	no	2012	No	7th	T3	2000-03-01	N0	MX	not reported	12b24c44-e023-5604-8b17-e7722437ec8f	C25.0	Head of pancreas	not reported	not reported	NA	Yes	a76e1d87-0e80-5688-9879-50945f159fe9	NA	NA
TCGA-2J-AABV-01A-12R-A41B-07	TCGA-2J-AABV-01A-12R-A41B-07	TCGA-2J-AABV	TCGA-2J-AABV-01A	TP	Primary solid Tumor	TCGA-2J-AABV-01A	1	Not Reported	1c82e2cb-5046-423c-818b-c6d205dc7f71	Primary Tumor	Not Reported	495	released	90	NA	D506891E-7B4D-449C-8BA9-2F8FE36C94DC	TCGA-2J-AABV	NA	TRUE	NA	FALSE	Not Reported	No	Stage IIB	0	not reported	Head of pancreas	NA	27082	Infiltrating duct carcinoma, NOS	no	2012	No	7th	T3	2000-03-01	N1	M0	not reported	9fa47be7-102f-5b2b-99f8-8a2686ebf7e0	C25.0	Head of pancreas	not reported	not reported	1.64384	No	e299170c-1cbb-5b96-911e-11eec3baf913	NA	30
TCGA-HZ-8636-01A-21R-2404-07	TCGA-HZ-8636-01A-21R-2404-07	TCGA-HZ-8636	TCGA-HZ-8636-01A	TP	Primary solid Tumor	TCGA-HZ-8636-01A	1	Not Reported	95c10f04-fb30-48b0-ae8b-ae90363da60c	Primary Tumor	Not Reported	NA	released	NA	0.7	f19d603c-c3cb-4173-abe1-b96af4c5331e	TCGA-HZ-8636	0.6	NA	0.9	FALSE	Not Reported	No	Stage IV	0	not reported	Tail of pancreas	5	21501	Infiltrating duct carcinoma, NOS	no	2012	No	7th	T3	2000-03-01	N0	M1	not reported	6dda35c2-bcd9-58a7-8589-b0f2a0da5409	C25.2	Tail of pancreas	not reported	not reported	NA	No	11d22de9-9d36-5170-af39-4b228c64b904	NA	NA
TCGA-IB-7651-01A-11R-2156-07	TCGA-IB-7651-01A-11R-2156-07	TCGA-IB-7651	TCGA-IB-7651-01A	TP	Primary solid Tumor	TCGA-IB-7651-01A	1	Not Reported	25160ba7-23d9-4234-a6c8-8a18e66b8b9b	Primary Tumor	Not Reported	NA	released	NA	0.5	82e80295-8f27-45f4-9c47-323eae67d009	TCGA-IB-7651	0.3	NA	1	FALSE	Not Reported	No	Stage IIB	0	not reported	Head of pancreas	NA	23580	Infiltrating duct carcinoma, NOS	no	2009	No	6th	T3	2000-03-01	N1	M0	not reported	0a0f2fce-2b7b-56a1-9a78-2f6c4a7a1fbd	C25.0	Head of pancreas	not reported	not reported	1.09589	Yes	ccea531c-6ec0-5392-b4c7-56eb0b67b41a	NA	20
TCGA-HZ-8637-01A-11R-2404-07	TCGA-HZ-8637-01A-11R-2404-07	TCGA-HZ-8637	TCGA-HZ-8637-01A	TP	Primary solid Tumor	TCGA-HZ-8637-01A	1	Not Reported	0739286f-c4f3-4c52-bc2a-57bf9807c02d	Primary Tumor	Not Reported	NA	released	NA	0.9	c0616007-805d-4f37-8bdd-da6dbe188fbe	TCGA-HZ-8637	0.6	NA	1.2	FALSE	Not Reported	No	Stage IIB	0	not reported	Head of pancreas	0	27929	Infiltrating duct carcinoma, NOS	no	2012	No	7th	T3	2000-03-01	N1	MX	not reported	6ade0d5f-0f06-5194-81b4-80859ca7d393	C25.0	Head of pancreas	not reported	not reported	NA	No	0b0ae5b9-d080-52fa-914c-0315e2b71291	NA	NA
TCGA-Q3-AA2A-01A-11R-A37L-07	TCGA-Q3-AA2A-01A-11R-A37L-07	TCGA-Q3-AA2A	TCGA-Q3-AA2A-01A	TP	Primary solid Tumor	TCGA-Q3-AA2A-01A	1	Not Reported	6426fcc8-8fab-4376-b5c0-08b90c975bf4	Primary Tumor	Not Reported	18	released	110	NA	610503C8-F430-417D-803C-52B08510F38C	TCGA-Q3-AA2A	NA	TRUE	NA	FALSE	Not Reported	No	Stage IB	0	not reported	Head of pancreas	95	23685	Infiltrating duct carcinoma, NOS	no	2013	No	7th	T3	2000-03-01	N1	MX	not reported	da23591a-7e41-5f55-b3b0-847dc68b6f3f	C25.0	Head of pancreas	not reported	not reported	NA	Yes	27af4ddc-f93d-5cb7-ba82-c643d7fee533	NA	NA
TCGA-3A-A9I9-01A-11R-A38C-07	TCGA-3A-A9I9-01A-11R-A38C-07	TCGA-3A-A9I9	TCGA-3A-A9I9-01A	TP	Primary solid Tumor	TCGA-3A-A9I9-01A	1	Not Reported	890188e5-9234-4b5d-8bca-68d8059c8645	Primary Tumor	Not Reported	1038	released	70	NA	E0B2E9CA-3563-4D29-BB48-57A77AC810CC	TCGA-3A-A9I9	NA	TRUE	NA	FALSE	Not Reported	No	Stage IIA	0	not reported	Head of pancreas	NA	24731	Infiltrating duct carcinoma, NOS	no	2011	No	7th	T3	2000-03-01	N0	MX	not reported	44e1c50d-5b2a-5acd-809f-d6f1be859834	C25.0	Head of pancreas	not reported	not reported	4.10959	Yes	963a196e-f40f-56cf-b347-9c770f020fa5	NA	75
TCGA-HZ-7920-01A-11R-2204-07	TCGA-HZ-7920-01A-11R-2204-07	TCGA-HZ-7920	TCGA-HZ-7920-01A	TP	Primary solid Tumor	TCGA-HZ-7920-01A	1	Not Reported	d77fff54-00dc-4bae-87be-581218089c09	Primary Tumor	Not Reported	NA	released	NA	0.7	55b6499b-f3c0-487b-acba-354b6c4f29f8	TCGA-HZ-7920	0.5	NA	1	FALSE	Not Reported	No	Stage IB	0	not reported	Head of pancreas	0	26167	Infiltrating duct carcinoma, NOS	no	2011	No	7th	T2	2000-03-01	N0	MX	not reported	e0555e9d-b941-529a-b0e7-28115158ac6f	C25.0	Head of pancreas	not reported	not reported	NA	No	e613c00b-159a-57e7-b54b-6a76fc3c2336	NA	NA
TCGA-Q3-A5QY-01A-12R-A32O-07	TCGA-Q3-A5QY-01A-12R-A32O-07	TCGA-Q3-A5QY	TCGA-Q3-A5QY-01A	TP	Primary solid Tumor	TCGA-Q3-A5QY-01A	1	Not Reported	b9c81d4e-8f69-466a-8d35-b624adf99009	Primary Tumor	Not Reported	44	released	650	NA	37299156-9A64-43F6-A4E1-AC398483ADF4	TCGA-Q3-A5QY	NA	TRUE	NA	FALSE	Not Reported	No	Stage IIB	0	not reported	Head of pancreas	416	21277	Infiltrating duct carcinoma, NOS	no	2012	No	7th	T3	2000-03-01	N1	MX	not reported	6d85664b-c313-536a-a349-a21f52148c99	C25.0	Head of pancreas	not reported	not reported	NA	No	9615554e-5bf0-54cf-a858-c725314589a6	NA	NA
TCGA-2J-AABT-01A-11R-A41B-07	TCGA-2J-AABT-01A-11R-A41B-07	TCGA-2J-AABT	TCGA-2J-AABT-01A	TP	Primary solid Tumor	TCGA-2J-AABT-01A	1	Not Reported	56c4c210-8d50-407e-a094-687295dffb84	Primary Tumor	Not Reported	399	released	80	NA	8E6CA78A-73D7-4286-88FA-02EB8923DEFD	TCGA-2J-AABT	NA	TRUE	NA	FALSE	Not Reported	No	Stage IIB	0	not reported	Head of pancreas	319	26379	Infiltrating duct carcinoma, NOS	yes	2012	No	7th	T3	2000-03-01	N1	M0	not reported	7706728e-6895-5e95-8522-dc4b9b952b2d	C25.0	Head of pancreas	not reported	not reported	NA	Yes	5bc6fafa-298e-569c-ac88-4ad0b1639b46	NA	NA
TCGA-HZ-A4BH-01A-11R-A26U-07	TCGA-HZ-A4BH-01A-11R-A26U-07	TCGA-HZ-A4BH	TCGA-HZ-A4BH-01A	TP	Primary solid Tumor	TCGA-HZ-A4BH-01A	1	Not Reported	5f91f484-6b2c-4b50-9392-3617b435c0b4	Primary Tumor	Not Reported	250	released	60	NA	7531D241-8782-4947-A4A5-E78F4D821A84	TCGA-HZ-A4BH	NA	FALSE	NA	FALSE	Not Reported	No	Stage IIB	0	not reported	Head of pancreas	194	27637	Infiltrating duct carcinoma, NOS	no	2011	No	7th	T3	2000-03-01	N1b	MX	not reported	057a9f0e-20b5-50a3-aea2-eb1aa04bef6e	C25.0	Head of pancreas	not reported	not reported	NA	No	e8b23774-9b99-5a3d-8768-9e29c9e1d44c	NA	NA
TCGA-HZ-8315-01A-11R-2404-07	TCGA-HZ-8315-01A-11R-2404-07	TCGA-HZ-8315	TCGA-HZ-8315-01A	TP	Primary solid Tumor	TCGA-HZ-8315-01A	1	Not Reported	005f1dd8-49e2-4448-b37e-ac9fcffb02d6	Primary Tumor	Not Reported	NA	released	NA	0.8	73614caa-e4f5-4277-bbdc-5e234eae8d27	TCGA-HZ-8315	0.3	NA	0.9	FALSE	Not Reported	No	Stage IIA	0	not reported	Head of pancreas	28	19839	Infiltrating duct carcinoma, NOS	no	2012	No	7th	T3	2000-03-01	N0	MX	not reported	c82a396e-5acf-56c0-a14f-40a139a8f528	C25.0	Head of pancreas	not reported	not reported	NA	Not Reported	18756f37-2764-547a-ad4c-5238aabecd34	NA	NA
TCGA-FB-AAPU-01A-31R-A41B-07	TCGA-FB-AAPU-01A-31R-A41B-07	TCGA-FB-AAPU	TCGA-FB-AAPU-01A	TP	Primary solid Tumor	TCGA-FB-AAPU-01A	1	Not Reported	b52b3fd1-29b7-4c74-b4bd-03f88500960f	Primary Tumor	Not Reported	1852	released	320	NA	BFB2AE34-A643-41B4-94FB-E5C9AD1F3F58	TCGA-FB-AAPU	NA	TRUE	NA	FALSE	Not Reported	No	Stage IIA	0	not reported	Head of pancreas	NA	15129	Infiltrating duct carcinoma, NOS	no	2008	No	7th	T3	2000-03-01	N0	MX	not reported	87225048-8aa2-566a-bc40-5db106bd3912	C25.0	Head of pancreas	not reported	not reported	NA	Yes	b3d27c1d-9cec-5575-97b3-31d4d30f7a19	NA	NA
TCGA-IB-A7LX-01A-12R-A36G-07	TCGA-IB-A7LX-01A-12R-A36G-07	TCGA-IB-A7LX	TCGA-IB-A7LX-01A	TP	Primary solid Tumor	TCGA-IB-A7LX-01A	1	Not Reported	d27fd323-24c9-4654-a8d5-42da2c54f294	Primary Tumor	Not Reported	273	released	200	NA	75710768-32CF-40B2-92B4-BED9E1EF39C5	TCGA-IB-A7LX	NA	TRUE	NA	FALSE	Not Reported	No	Stage IIB	0	not reported	Head of pancreas	NA	20898	Infiltrating duct carcinoma, NOS	no	2012	No	7th	T3	2000-03-01	N1	MX	not reported	1eb7f946-c621-563a-a68e-3c0a359cacbd	C25.0	Head of pancreas	not reported	not reported	NA	Yes	f46f4ea1-c324-5bd5-9c6c-2a4414d0b551	NA	NA
TCGA-2L-AAQM-01A-11R-A39D-07	TCGA-2L-AAQM-01A-11R-A39D-07	TCGA-2L-AAQM	TCGA-2L-AAQM-01A	TP	Primary solid Tumor	TCGA-2L-AAQM-01A	1	Not Reported	7e36bec6-1b3b-43d9-a97e-9d96d323f0f5	Primary Tumor	Not Reported	1091	released	430	NA	4797C80B-B1BD-447A-BD5F-9150BCD94317	TCGA-2L-AAQM	NA	FALSE	NA	FALSE	Not Reported	No	Stage IIB	0	not reported	Pancreas, NOS	1383	19315	Neuroendocrine carcinoma, NOS	no	2010	No	7th	T3	1946-03-01	N1	MX	not reported	1fe93d72-1006-556b-b86c-223c996862da	C25.0	Pancreas, NOS	not reported	not reported	NA	Yes	f96f0675-0d71-59b1-87c6-ae17d99cc209	NA	NA
TCGA-FB-A4P5-01A-11R-A26U-07	TCGA-FB-A4P5-01A-11R-A26U-07	TCGA-FB-A4P5	TCGA-FB-A4P5-01A	TP	Primary solid Tumor	TCGA-FB-A4P5-01A	1	Not Reported	fb8b9904-e06a-4655-98f6-04b6eca74a8a	Primary Tumor	Not Reported	90	released	500	NA	4A47BFA2-CCFC-4E70-9631-88D856526B08	TCGA-FB-A4P5	NA	TRUE	NA	FALSE	Not Reported	No	Stage IIB	0	not reported	Head of pancreas	4	25412	Infiltrating duct carcinoma, NOS	no	2012	No	7th	T3	2000-03-01	N1	MX	not reported	ce452551-a2bf-592f-b4bc-ce576bfe28da	C25.0	Head of pancreas	not reported	not reported	2.19178	No	f1aed1e9-2778-5fb9-b68b-f04994a23806	40	40
TCGA-XD-AAUH-01A-42R-A41B-07	TCGA-XD-AAUH-01A-42R-A41B-07	TCGA-XD-AAUH	TCGA-XD-AAUH-01A	TP	Primary solid Tumor	TCGA-XD-AAUH-01A	1	Not Reported	f48b603f-9a37-4a3b-95a3-3fb7cc0e5510	Primary Tumor	Not Reported	43	released	1150	NA	7547A833-EA2B-48ED-B779-D632A6869FA0	TCGA-XD-AAUH	NA	TRUE	NA	FALSE	Not Reported	No	Stage IIB	0	not reported	Head of pancreas	395	20858	Infiltrating duct carcinoma, NOS	no	2013	No	7th	T3	2000-03-01	N1	M0	not reported	f110d91d-724a-53bc-a8d3-d29c7238c6cf	C25.0	Head of pancreas	not reported	not reported	NA	Yes	22818a18-e901-5bff-a39d-c6de9adfc4c7	NA	NA
TCGA-YB-A89D-11A-11R-A36G-07	TCGA-YB-A89D-11A-11R-A36G-07	TCGA-YB-A89D	TCGA-YB-A89D-11A	NT	Solid Tissue Normal	TCGA-YB-A89D-11A	11	Not Reported	fe9894b8-1cf6-43dc-8cc5-3322b781e2f5	Solid Tissue Normal	Not Reported	48	released	180	NA	NA	TCGA-YB-A89D	NA	FALSE	NA	FALSE	Not Reported	No	Stage IIB	0	not reported	Body of pancreas	350	21792	Infiltrating duct carcinoma, NOS	no	2013	No	7th	T3	2000-03-01	N1	MX	not reported	bbffbce8-391b-5e31-bf44-472e7cd5e5e2	C25.1	Body of pancreas	not reported	not reported	NA	No	fcf678a9-0acd-5f2c-b520-51614d4eb8e9	NA	NA
TCGA-YB-A89D-01A-12R-A36G-07	TCGA-YB-A89D-01A-12R-A36G-07	TCGA-YB-A89D	TCGA-YB-A89D-01A	TP	Primary solid Tumor	TCGA-YB-A89D-01A	1	Not Reported	6385cf7e-9b2b-4bb2-a717-d889758e8943	Primary Tumor	Not Reported	48	released	180	NA	385946B6-CD7F-45B5-BD72-AB6FDDCC9AB5	TCGA-YB-A89D	NA	FALSE	NA	FALSE	Not Reported	No	Stage IIB	0	not reported	Body of pancreas	350	21792	Infiltrating duct carcinoma, NOS	no	2013	No	7th	T3	2000-03-01	N1	MX	not reported	bbffbce8-391b-5e31-bf44-472e7cd5e5e2	C25.1	Body of pancreas	not reported	not reported	NA	No	fcf678a9-0acd-5f2c-b520-51614d4eb8e9	NA	NA
TCGA-FB-AAQ0-01A-31R-A41B-07	TCGA-FB-AAQ0-01A-31R-A41B-07	TCGA-FB-AAQ0	TCGA-FB-AAQ0-01A	TP	Primary solid Tumor	TCGA-FB-AAQ0-01A	1	Not Reported	00585894-808a-4635-8a2e-94cd72599c1a	Primary Tumor	Not Reported	1001	released	330	NA	C40B3100-1BFC-4763-964C-89AECCA0B7F7	TCGA-FB-AAQ0	NA	TRUE	NA	FALSE	Not Reported	No	Stage IIA	0	not reported	Head of pancreas	NA	24988	Infiltrating duct carcinoma, NOS	no	2011	No	7th	T3	2000-03-01	N0	MX	not reported	be056f3d-baa0-5b32-9da9-c22f0457f28a	C25.0	Head of pancreas	not reported	not reported	NA	No	acabe7ce-54d4-5642-9867-1a8676585c18	NA	NA
TCGA-F2-6879-01A-11R-2156-07	TCGA-F2-6879-01A-11R-2156-07	TCGA-F2-6879	TCGA-F2-6879-01A	TP	Primary solid Tumor	TCGA-F2-6879-01A	1	Not Reported	d43f0112-fe59-4842-9fda-1189e5fb7248	Primary Tumor	Not Reported	NA	released	NA	0.5	2759d3d4-aabe-49c8-b0cc-0365268dc686	TCGA-F2-6879	0.2	NA	1	FALSE	Not Reported	No	Stage IIB	0	not reported	Head of pancreas	NA	20984	Adenocarcinoma, NOS	no	2009	No	6th	T3	1940-03-01	N1	M0	not reported	5f4e6d87-5739-5a25-824f-844cacb643ed	C25.0	Head of pancreas	not reported	not reported	NA	Yes	bb89f4b0-79da-514c-9088-ebb5f7164118	NA	NA
TCGA-2J-AABK-01A-31R-A41B-07	TCGA-2J-AABK-01A-31R-A41B-07	TCGA-2J-AABK	TCGA-2J-AABK-01A	TP	Primary solid Tumor	TCGA-2J-AABK-01A	1	Not Reported	91c8bca0-b881-4439-b186-d309c513faa2	Primary Tumor	Not Reported	386	released	210	NA	2B943B62-8FF9-4719-AD78-78546FB843B5	TCGA-2J-AABK	NA	TRUE	NA	FALSE	Not Reported	No	Stage IIB	0	not reported	Head of pancreas	484	26188	Infiltrating duct carcinoma, NOS	no	2012	No	7th	T3	2000-03-01	N1	M0	not reported	5aafc85c-6be9-55f5-9374-67e7245e0673	C25.0	Head of pancreas	not reported	not reported	NA	No	337f22cd-cced-5100-bb71-70aa06baaf9e	NA	NA
TCGA-FB-A4P6-01A-12R-A26U-07	TCGA-FB-A4P6-01A-12R-A26U-07	TCGA-FB-A4P6	TCGA-FB-A4P6-01A	TP	Primary solid Tumor	TCGA-FB-A4P6-01A	1	Not Reported	1412eb00-7508-4933-8888-e76fe385beff	Primary Tumor	Not Reported	76	released	760	NA	BC211027-32C2-4E6B-BEF6-9B0407966A1E	TCGA-FB-A4P6	NA	TRUE	NA	FALSE	Not Reported	No	Stage IIB	0	not reported	Head of pancreas	767	19904	Infiltrating duct carcinoma, NOS	no	2012	No	7th	T3	2000-03-01	N1	MX	not reported	6a93e850-134b-54e4-bf86-2a792d36f71d	C25.0	Head of pancreas	not reported	not reported	1.36986	Yes	8f9e2c93-31d0-5e0c-9053-81d6ae33cb6e	25	25
TCGA-HZ-8317-01A-11R-2404-07	TCGA-HZ-8317-01A-11R-2404-07	TCGA-HZ-8317	TCGA-HZ-8317-01A	TP	Primary solid Tumor	TCGA-HZ-8317-01A	1	Not Reported	3e960dfc-9649-441d-a196-df73d07dfa4c	Primary Tumor	Not Reported	NA	released	NA	0.7	d0ea6c64-05f9-40bd-a69c-329334d20393	TCGA-HZ-8317	0.5	NA	1	FALSE	Not Reported	No	Stage IIB	0	not reported	Head of pancreas	16	25214	Infiltrating duct carcinoma, NOS	no	2012	No	7th	T3	2000-03-01	N1	MX	not reported	40b7a90b-78c6-57b6-9a20-be7a54123b6b	C25.0	Head of pancreas	not reported	not reported	NA	No	f37e5054-f314-56e3-ab10-38a76e5c0e12	NA	NA
TCGA-3A-A9IU-01A-11R-A39D-07	TCGA-3A-A9IU-01A-11R-A39D-07	TCGA-3A-A9IU	TCGA-3A-A9IU-01A	TP	Primary solid Tumor	TCGA-3A-A9IU-01A	1	Not Reported	4d3509fe-b8a7-4a45-a32a-82ba4d5fbf95	Primary Tumor	Not Reported	946	released	80	NA	49937937-79B1-4723-9E00-9EDD2F8707BC	TCGA-3A-A9IU	NA	TRUE	NA	FALSE	Not Reported	No	Stage IIB	0	not reported	Head of pancreas	NA	23998	Infiltrating duct carcinoma, NOS	no	2011	No	7th	T3	2000-03-01	N1	MX	not reported	eb235b8d-ba19-5dc1-a493-d06f87579f34	C25.0	Head of pancreas	not reported	not reported	NA	Yes	31ef9c90-f6f0-503d-a10c-530fc3755bc7	NA	NA
TCGA-FB-A7DR-01A-21R-A33R-07	TCGA-FB-A7DR-01A-21R-A33R-07	TCGA-FB-A7DR	TCGA-FB-A7DR-01A	TP	Primary solid Tumor	TCGA-FB-A7DR-01A	1	Not Reported	e40d74da-ac10-42a5-82c0-efb80b75948e	Primary Tumor	Not Reported	250	released	1350	NA	DEBA9632-E0F3-4D6C-836B-543E07B42612	TCGA-FB-A7DR	NA	TRUE	NA	FALSE	Not Reported	No	Stage IIA	0	not reported	Head of pancreas	166	17649	Mucinous adenocarcinoma	no	2012	No	7th	T3	1980-03-01	NX	M0	not reported	4cf32046-1f5b-552a-a16d-df3387348870	C25.0	Head of pancreas	not reported	not reported	1.09589	Yes	abc0832d-2d52-51bc-98ce-ae89c67e976f	NA	20
TCGA-HV-A5A3-11A-11R-A26U-07	TCGA-HV-A5A3-11A-11R-A26U-07	TCGA-HV-A5A3	TCGA-HV-A5A3-11A	NT	Solid Tissue Normal	TCGA-HV-A5A3-11A	11	Not Reported	9e5ebd9a-2e65-482a-a967-294c4673fc2d	Solid Tissue Normal	Not Reported	226	released	30	NA	NA	TCGA-HV-A5A3	NA	FALSE	NA	FALSE	Not Reported	No	Stage IIA	0	not reported	Body of pancreas	NA	18475	Infiltrating duct carcinoma, NOS	no	2012	No	7th	T3	2000-03-01	NX	MX	not reported	043f6833-85a3-5fca-829c-7301f738cc79	C25.1	Body of pancreas	not reported	not reported	NA	Yes	bd222ef7-4e46-5466-bc72-d616ea1165b6	NA	NA
TCGA-2J-AABR-01A-11R-A41B-07	TCGA-2J-AABR-01A-11R-A41B-07	TCGA-2J-AABR	TCGA-2J-AABR-01A	TP	Primary solid Tumor	TCGA-2J-AABR-01A	1	Not Reported	aa314c08-f2bc-4682-97bc-ad9d25ebc036	Primary Tumor	Not Reported	243	released	120	NA	178FDFAF-0AFA-4A07-9F59-5E0617DA3B7C	TCGA-2J-AABR	NA	TRUE	NA	FALSE	Not Reported	No	Stage IIA	0	not reported	Overlapping lesion of pancreas	438	22131	Infiltrating duct carcinoma, NOS	yes	2013	No	7th	T3	2000-03-01	N0	M0	not reported	3252c908-1ed4-59c4-8a66-6a5188f07ef9	C25.8	Overlapping lesion of pancreas	not reported	not reported	NA	No	94bb4625-b691-5f34-8dcd-30857b817fcb	NA	NA
TCGA-H8-A6C1-01A-11R-A32O-07	TCGA-H8-A6C1-01A-11R-A32O-07	TCGA-H8-A6C1	TCGA-H8-A6C1-01A	TP	Primary solid Tumor	TCGA-H8-A6C1-01A	1	Not Reported	3ec700d8-4da1-4149-9c31-4d70702c5fd5	Primary Tumor	Not Reported	198	released	90	NA	719BE4BC-2FEB-4AB4-8F9E-D1BBD7085975	TCGA-H8-A6C1	NA	FALSE	NA	FALSE	Not Reported	No	Stage IIA	0	not reported	Head of pancreas	671	19677	Adenocarcinoma, NOS	no	2012	No	7th	T3	1940-03-01	N0	MX	not reported	3bcf8dbc-5ad6-5d10-adf8-2c091db0a674	C25.0	Head of pancreas	not reported	not reported	1.64384	Yes	c0dd2255-5037-54f6-8755-0a0c17215f84	30	30
TCGA-LB-A9Q5-01A-11R-A39D-07	TCGA-LB-A9Q5-01A-11R-A39D-07	TCGA-LB-A9Q5	TCGA-LB-A9Q5-01A	TP	Primary solid Tumor	TCGA-LB-A9Q5-01A	1	Not Reported	383aaf87-c731-478c-bf74-eb6261a237f8	Primary Tumor	Not Reported	11	released	170	NA	54BFFF2A-842D-4207-9753-32DCC2DE15C8	TCGA-LB-A9Q5	NA	FALSE	NA	FALSE	Not Reported	No	Stage IIB	0	not reported	Head of pancreas	155	23218	Infiltrating duct carcinoma, NOS	no	2013	No	7th	T3	2000-03-01	N1	MX	not reported	a82bb9c8-d41b-55cf-ae0c-1a108905ff6e	C25.0	Head of pancreas	not reported	not reported	0.0164384	Yes	2e5a33df-41f5-5630-a7f4-9c952930e349	2	0.3
TCGA-3A-A9IJ-01A-11R-A39D-07	TCGA-3A-A9IJ-01A-11R-A39D-07	TCGA-3A-A9IJ	TCGA-3A-A9IJ-01A	TP	Primary solid Tumor	TCGA-3A-A9IJ-01A	1	Not Reported	f80e9141-3634-49cd-8c85-610c7f644d83	Primary Tumor	Not Reported	1520	released	50	NA	5DFA5593-F509-463C-A384-0A7F07B1B2BE	TCGA-3A-A9IJ	NA	TRUE	NA	FALSE	Not Reported	No	Stage IB	0	not reported	Head of pancreas	1854	23791	Neuroendocrine carcinoma, NOS	yes	2009	No	6th	T2	1946-03-01	N0	MX	not reported	ca8227f1-14fb-5ca2-99ea-58aa3ef7e876	C25.0	Head of pancreas	not reported	not reported	1.36986	No	9b075f39-2a08-5c9f-bd76-fd433bb2d92e	30	25
TCGA-HZ-8002-01A-11R-2204-07	TCGA-HZ-8002-01A-11R-2204-07	TCGA-HZ-8002	TCGA-HZ-8002-01A	TP	Primary solid Tumor	TCGA-HZ-8002-01A	1	Not Reported	bec00d02-06d8-40a0-b387-339f4cb4d0db	Primary Tumor	Not Reported	NA	released	NA	0.5	e0b6576a-ca98-4a40-a8e8-aa1e282e570f	TCGA-HZ-8002	0.4	NA	1	FALSE	Not Reported	No	Stage IIB	0	not reported	Head of pancreas	24	22433	Infiltrating duct carcinoma, NOS	no	2011	No	7th	T3	2000-03-01	N1	MX	not reported	42a6d5a1-812f-56cd-9dd1-b68ba6e09bf5	C25.0	Head of pancreas	not reported	not reported	NA	Not Reported	7e0af56c-6917-5c59-9406-e99b35d239e3	NA	NA
TCGA-FB-AAQ3-01A-11R-A41B-07	TCGA-FB-AAQ3-01A-11R-A41B-07	TCGA-FB-AAQ3	TCGA-FB-AAQ3-01A	TP	Primary solid Tumor	TCGA-FB-AAQ3-01A	1	Not Reported	1f877e0a-02e7-4b3f-88f0-221054d20b6c	Primary Tumor	Not Reported	1275	released	90	NA	15FE46F1-194A-4799-8C77-A3FA23CC5D96	TCGA-FB-AAQ3	NA	TRUE	NA	FALSE	Not Reported	No	Stage IIB	0	not reported	Head of pancreas	NA	23953	Infiltrating duct carcinoma, NOS	no	2010	No	7th	T3	2000-03-01	N1	MX	not reported	d9c20af7-109d-51cb-ac02-8503a50879b6	C25.0	Head of pancreas	not reported	not reported	NA	Yes	8e03a82c-57c1-5df8-9d77-2063400b4014	NA	NA
TCGA-HZ-8638-01A-11R-2404-07	TCGA-HZ-8638-01A-11R-2404-07	TCGA-HZ-8638	TCGA-HZ-8638-01A	TP	Primary solid Tumor	TCGA-HZ-8638-01A	1	Not Reported	d3e04f38-f5a6-42bc-a588-bdb1bff74da2	Primary Tumor	Not Reported	NA	released	NA	0.8	ab82eaf3-2f55-47ab-819f-9ad1000f7eb1	TCGA-HZ-8638	0.6	NA	1	FALSE	Not Reported	No	Stage IA	0	not reported	Head of pancreas	91	30821	Mucinous adenocarcinoma	no	2012	No	7th	T1	1980-03-01	N0	MX	not reported	6efbba28-ad00-5f1c-8669-5a12e9b652b3	C25.0	Head of pancreas	not reported	not reported	NA	No	3dff9095-1ac9-5546-9f8f-89713d1ab5a6	NA	NA
TCGA-Z5-AAPL-01A-12R-A41B-07	TCGA-Z5-AAPL-01A-12R-A41B-07	TCGA-Z5-AAPL	TCGA-Z5-AAPL-01A	TP	Primary solid Tumor	TCGA-Z5-AAPL-01A	1	Not Reported	60ff16b8-4c68-45b1-864b-39818f6dde5c	Primary Tumor	Not Reported	220	released	170	NA	10A49855-26E8-47AB-B7A8-941737E26C1A	TCGA-Z5-AAPL	NA	TRUE	NA	FALSE	Not Reported	No	Stage IIA	0	not reported	Pancreas, NOS	467	27152	Infiltrating duct carcinoma, NOS	no	2013	No	7th	T3	2000-03-01	N0	M0	not reported	6a669fca-37d1-5a0a-9547-2903388906a2	C25.9	Pancreas, NOS	not reported	not reported	NA	Not Reported	01495aa0-d047-5bcd-8f2c-e88934f6b72c	NA	NA
TCGA-IB-A5SQ-01A-11R-A32O-07	TCGA-IB-A5SQ-01A-11R-A32O-07	TCGA-IB-A5SQ	TCGA-IB-A5SQ-01A	TP	Primary solid Tumor	TCGA-IB-A5SQ-01A	1	Not Reported	70ebc8c8-bfb1-4a94-a8f5-6d8ac9262bd1	Primary Tumor	Not Reported	204	released	210	NA	AC5FDD0E-5B64-45E4-8A37-A546BE584DEB	TCGA-IB-A5SQ	NA	TRUE	NA	FALSE	Not Reported	No	Stage IB	0	not reported	Head of pancreas	NA	20760	Infiltrating duct carcinoma, NOS	no	2012	No	7th	T2	2000-03-01	N0	M0	not reported	471847c0-c9b3-5a06-ba68-934d657acd64	C25.0	Head of pancreas	not reported	not reported	NA	Yes	c0e19d1e-5fc4-5af1-8a96-a1c2b65c1f80	NA	NA
TCGA-IB-AAUO-01A-12R-A38C-07	TCGA-IB-AAUO-01A-12R-A38C-07	TCGA-IB-AAUO	TCGA-IB-AAUO-01A	TP	Primary solid Tumor	TCGA-IB-AAUO-01A	1	Not Reported	54f91e93-7222-49b4-a70b-d9456fdb753b	Primary Tumor	Not Reported	87	released	250	NA	983120BC-7479-4129-ADBE-D9FAEFC2840E	TCGA-IB-AAUO	NA	TRUE	NA	FALSE	Not Reported	No	Stage IIB	0	not reported	Head of pancreas	NA	23622	Infiltrating duct carcinoma, NOS	no	2013	No	7th	T3	2000-03-01	N1	M0	not reported	4f047c1d-c117-58d2-96b0-b9a223fa701f	C25.0	Head of pancreas	not reported	not reported	NA	Yes	51959d50-906e-597d-86bd-7a902ef1f7c0	NA	NA
TCGA-US-A77E-01A-11R-A32O-07	TCGA-US-A77E-01A-11R-A32O-07	TCGA-US-A77E	TCGA-US-A77E-01A	TP	Primary solid Tumor	TCGA-US-A77E-01A	1	Not Reported	a8b93262-43c7-4d73-a6b2-479673612d53	Primary Tumor	Not Reported	468	released	200	NA	28115619-9EDD-41D9-A912-25D3BCB83DC4	TCGA-US-A77E	NA	TRUE	NA	FALSE	Not Reported	No	Stage IIB	0	not reported	Head of pancreas	NA	26745	Adenocarcinoma, NOS	yes	2012	No	7th	T3	1940-03-01	N1	MX	not reported	86eface7-d88b-5c3b-b8a0-d65a2722f2dc	C25.0	Head of pancreas	not reported	not reported	NA	Yes	f3e6bb84-88fd-5cfe-ad3e-c348b1eaa6c9	NA	NA
TCGA-3A-A9IX-01A-11R-A41B-07	TCGA-3A-A9IX-01A-11R-A41B-07	TCGA-3A-A9IX	TCGA-3A-A9IX-01A	TP	Primary solid Tumor	TCGA-3A-A9IX-01A	1	Not Reported	77848ff8-48bc-434d-a393-b295a3bf71f5	Primary Tumor	Not Reported	715	released	80	NA	4B708CCE-6C54-4A4B-8E27-519461D5A1C2	TCGA-3A-A9IX	NA	TRUE	NA	FALSE	Not Reported	No	Stage IA	0	not reported	Head of pancreas	1037	14729	Infiltrating duct carcinoma, NOS	no	2012	No	7th	T1	2000-03-01	N0	MX	not reported	721cabc6-78ad-53b0-b4c6-708b737b5965	C25.0	Head of pancreas	not reported	not reported	0.126027	Yes	3d3f75dc-b59a-5b2d-9407-f08502bb8336	22	2.3
TCGA-IB-AAUN-01A-12R-A38C-07	TCGA-IB-AAUN-01A-12R-A38C-07	TCGA-IB-AAUN	TCGA-IB-AAUN-01A	TP	Primary solid Tumor	TCGA-IB-AAUN-01A	1	Not Reported	71e44d9e-5f8c-4549-a33d-f785a301f152	Primary Tumor	Not Reported	97	released	140	NA	A528322F-F869-4016-A8C2-F3A43B39F6AB	TCGA-IB-AAUN	NA	TRUE	NA	FALSE	Not Reported	No	Stage IB	0	not reported	Head of pancreas	NA	27128	Infiltrating duct carcinoma, NOS	no	2013	No	7th	T2	2000-03-01	N0	M0	not reported	62acbb36-1d73-5e99-8c40-eed8a589868a	C25.0	Head of pancreas	not reported	not reported	NA	Yes	c0ce5e31-5213-5727-b7c4-bfb48de3f0d8	NA	NA
TCGA-IB-7885-01A-11R-2156-07	TCGA-IB-7885-01A-11R-2156-07	TCGA-IB-7885	TCGA-IB-7885-01A	TP	Primary solid Tumor	TCGA-IB-7885-01A	1	Not Reported	5efe29b7-fe78-480a-a2b7-dbb605482e83	Primary Tumor	Not Reported	NA	released	NA	1	29bb1247-7507-4c0d-984d-10956563c3e4	TCGA-IB-7885	0.2	NA	2	FALSE	Not Reported	No	Stage IIB	0	not reported	Pancreas, NOS	1257	28554	Infiltrating duct carcinoma, NOS	no	2010	No	7th	T3	2000-03-01	N1	M0	not reported	a68c000d-8ce5-5273-bc00-b33fb1239a84	C25.9	Pancreas, NOS	not reported	not reported	1.09589	Yes	185bdac0-2f84-5c13-ba9d-c9f0ab982b42	20	20
TCGA-HZ-8519-01A-11R-2404-07	TCGA-HZ-8519-01A-11R-2404-07	TCGA-HZ-8519	TCGA-HZ-8519-01A	TP	Primary solid Tumor	TCGA-HZ-8519-01A	1	Not Reported	3fc8ab9f-c744-4d0e-8f74-c6c436ab68e3	Primary Tumor	Not Reported	NA	released	NA	0.6	7e85913b-33af-4bb5-af45-e6b11a996c33	TCGA-HZ-8519	0.4	NA	1.2	FALSE	Not Reported	No	Stage IA	0	not reported	Head of pancreas	454	26947	Adenocarcinoma, NOS	no	2012	No	7th	T1	1940-03-01	N0	MX	not reported	1a26d338-80c2-5f89-bedf-7ed89857b820	C25.0	Head of pancreas	not reported	not reported	NA	No	0f0e1d21-7299-5ba4-8a00-b90123382a2d	NA	NA
TCGA-HZ-8003-01A-21R-2204-07	TCGA-HZ-8003-01A-21R-2204-07	TCGA-HZ-8003	TCGA-HZ-8003-01A	TP	Primary solid Tumor	TCGA-HZ-8003-01A	1	Not Reported	fe43aa5c-8151-4565-950d-e5a3dfa328d3	Primary Tumor	Not Reported	NA	released	NA	0.5	6a1d0a0e-ca8e-4243-9700-f738b073407c	TCGA-HZ-8003	0.4	NA	1.4	FALSE	Not Reported	No	Stage IIB	0	not reported	Head of pancreas	21	23868	Infiltrating duct carcinoma, NOS	no	2011	No	7th	T3	2000-03-01	N1	MX	not reported	de25b0c4-0638-5717-a087-c941306cccc0	C25.0	Head of pancreas	not reported	not reported	NA	Not Reported	55d4566b-e2f6-5f2f-9378-77841138e771	NA	NA
TCGA-HZ-A8P1-01A-11R-A37L-07	TCGA-HZ-A8P1-01A-11R-A37L-07	TCGA-HZ-A8P1	TCGA-HZ-A8P1-01A	TP	Primary solid Tumor	TCGA-HZ-A8P1-01A	1	Not Reported	69663afc-2cb6-4163-a9a1-64cd4593da63	Primary Tumor	Not Reported	37	released	30	NA	80B04A2F-D419-4E6A-80C3-605BAE94D96A	TCGA-HZ-A8P1	NA	FALSE	NA	FALSE	Not Reported	No	Stage IB	0	not reported	Tail of pancreas	7	29631	Infiltrating duct carcinoma, NOS	no	2013	No	7th	T2	2000-03-01	N0	MX	not reported	42f043d3-4050-58c4-a8ee-744cf843b47f	C25.2	Tail of pancreas	not reported	not reported	0.821918	No	9be51112-6687-5c8c-b239-550c7020b700	15	15
TCGA-2L-AAQE-01A-11R-A39D-07	TCGA-2L-AAQE-01A-11R-A39D-07	TCGA-2L-AAQE	TCGA-2L-AAQE-01A	TP	Primary solid Tumor	TCGA-2L-AAQE-01A	1	Not Reported	d5f3de1e-e4df-499f-b9c2-d1f5fb841f3d	Primary Tumor	Not Reported	1003	released	40	NA	139BF7AF-2E19-44A4-ACD5-E343C89E34D6	TCGA-2L-AAQE	NA	FALSE	NA	FALSE	Not Reported	No	Stage IIB	0	not reported	Head of pancreas	NA	20618	Infiltrating duct carcinoma, NOS	no	2011	No	7th	T3	2000-03-01	N1	M0	not reported	1356a062-c758-52bf-9ad0-613308fb5b9d	C25.0	Head of pancreas	not reported	not reported	1.64384	Yes	25f43018-45b2-59d1-98ec-8e37cc8008d9	NA	30
TCGA-3E-AAAY-01A-11R-A38C-07	TCGA-3E-AAAY-01A-11R-A38C-07	TCGA-3E-AAAY	TCGA-3E-AAAY-01A	TP	Primary solid Tumor	TCGA-3E-AAAY-01A	1	Not Reported	f6ead66c-5dbc-4134-b476-552f89990584	Primary Tumor	Not Reported	2017	released	20	NA	AD52C918-01E3-4EE0-8207-79A17EA7F715	TCGA-3E-AAAY	NA	TRUE	NA	FALSE	Not Reported	No	Stage IIB	0	not reported	Body of pancreas	2285	24760	Infiltrating duct carcinoma, NOS	no	2008	No	6th	T3	2000-03-01	N1	MX	not reported	50232666-4b3b-5d4d-af36-c7094e632a5b	C25.1	Body of pancreas	not reported	not reported	NA	Yes	d8b63f72-4f39-5dc3-9f90-df29478ae595	NA	NA
TCGA-FB-AAQ2-01A-31R-A41B-07	TCGA-FB-AAQ2-01A-31R-A41B-07	TCGA-FB-AAQ2	TCGA-FB-AAQ2-01A	TP	Primary solid Tumor	TCGA-FB-AAQ2-01A	1	Not Reported	a180ab4a-9754-4e89-a00b-e0a0243d85b8	Primary Tumor	Not Reported	879	released	540	NA	10BE4376-2ED6-43BA-B542-9F3E96419BB9	TCGA-FB-AAQ2	NA	TRUE	NA	FALSE	Not Reported	No	Stage IIB	0	not reported	Head of pancreas	NA	29585	Infiltrating duct carcinoma, NOS	no	2011	No	7th	T3	2000-03-01	N1	MX	not reported	b05bc493-7cdc-53be-9c0e-fb31796689c0	C25.0	Head of pancreas	not reported	not reported	NA	Yes	e0f4af6e-7c6f-5599-8e22-8ad07c3621a1	NA	NA
TCGA-IB-AAUM-01A-11R-A37L-07	TCGA-IB-AAUM-01A-11R-A37L-07	TCGA-IB-AAUM	TCGA-IB-AAUM-01A	TP	Primary solid Tumor	TCGA-IB-AAUM-01A	1	Not Reported	5045b6b2-2a2d-4132-a3b7-4e3f98d56b10	Primary Tumor	Not Reported	133	released	180	NA	D1BB2C1B-DE74-4597-AA61-35CB19E069C6	TCGA-IB-AAUM	NA	TRUE	NA	FALSE	Not Reported	No	Stage IIB	0	not reported	Head of pancreas	8	28013	Infiltrating duct carcinoma, NOS	no	2013	No	7th	T2	2000-03-01	N1	M0	not reported	69b897bf-7a34-56f2-a3ce-2ffba580f56d	C25.0	Head of pancreas	not reported	not reported	NA	Yes	e6398f19-a307-5369-908f-0b678d57db52	NA	NA
TCGA-IB-7886-01A-11R-2156-07	TCGA-IB-7886-01A-11R-2156-07	TCGA-IB-7886	TCGA-IB-7886-01A	TP	Primary solid Tumor	TCGA-IB-7886-01A	1	Not Reported	1ac9e2ae-4a92-4a03-9b6a-4ba8cf314bc6	Primary Tumor	Not Reported	NA	released	NA	1.1	5d0f6ae4-a2ad-40bf-a823-11d065d5b1f1	TCGA-IB-7886	0.2	NA	1.4	FALSE	Not Reported	No	Stage IIB	0	not reported	Pancreas, NOS	NA	29319	Infiltrating duct carcinoma, NOS	no	2010	No	7th	T3	2000-03-01	N1	M0	not reported	fbede52b-d3a4-50e5-befb-3d051c5e5065	C25.9	Pancreas, NOS	not reported	not reported	1.91781	Yes	faebacde-60dc-574a-8f8f-f366f400d14a	NA	35
TCGA-XN-A8T3-01A-11R-A36G-07	TCGA-XN-A8T3-01A-11R-A36G-07	TCGA-XN-A8T3	TCGA-XN-A8T3-01A	TP	Primary solid Tumor	TCGA-XN-A8T3-01A	1	Not Reported	0f850dd7-7a15-434d-acf6-2398f53cf6ad	Primary Tumor	Not Reported	628	released	80	NA	4B77F18C-2A61-42E5-BF41-05FB9959EB3F	TCGA-XN-A8T3	NA	TRUE	NA	FALSE	Not Reported	No	Stage IB	0	not reported	Head of pancreas	951	24810	Infiltrating duct carcinoma, NOS	no	2012	No	7th	T2	2000-03-01	N0	M0	not reported	17c0b5e9-5ddb-5dc1-a550-38eddb8ee5b9	C25.0	Head of pancreas	not reported	not reported	NA	No	3bbf67ee-82b1-5485-96d7-cf5771842c18	NA	NA
TCGA-2J-AABA-01A-21R-A41B-07	TCGA-2J-AABA-01A-21R-A41B-07	TCGA-2J-AABA	TCGA-2J-AABA-01A	TP	Primary solid Tumor	TCGA-2J-AABA-01A	1	Not Reported	69deb72b-6c40-4659-b1fc-af063bab7823	Primary Tumor	Not Reported	598	released	240	NA	FA359088-C46F-4395-9AFA-4B539C3ACF76	TCGA-2J-AABA	NA	TRUE	NA	FALSE	Not Reported	No	Stage IIB	0	not reported	Head of pancreas	NA	20133	Infiltrating duct carcinoma, NOS	no	2012	No	7th	T3	2000-03-01	N1	M0	not reported	03cbfbf1-b6aa-5c1f-b223-a66ec4ad49e9	C25.0	Head of pancreas	not reported	not reported	2.79452	No	bf17b080-aab5-5f4c-8458-9e066ce524ba	NA	51
TCGA-LB-A8F3-01A-11R-A36G-07	TCGA-LB-A8F3-01A-11R-A36G-07	TCGA-LB-A8F3	TCGA-LB-A8F3-01A	TP	Primary solid Tumor	TCGA-LB-A8F3-01A	1	Not Reported	d9a823d5-eb37-4bc7-98b1-bd09da314c62	Primary Tumor	Not Reported	16	released	680	NA	44BA040E-C349-4D92-AB2B-A271769B466C	TCGA-LB-A8F3	NA	FALSE	NA	FALSE	Not Reported	No	Stage IIA	0	not reported	Head of pancreas	379	23624	Infiltrating duct carcinoma, NOS	no	2013	No	7th	T3	2000-03-01	N0	MX	not reported	cae674ca-5b2e-5b4a-af74-f8d19c1836f1	C25.0	Head of pancreas	not reported	not reported	NA	Yes	333778b4-8769-5884-9d05-17a1c305ff4c	NA	NA
TCGA-IB-A5SO-01A-11R-A32O-07	TCGA-IB-A5SO-01A-11R-A32O-07	TCGA-IB-A5SO	TCGA-IB-A5SO-01A	TP	Primary solid Tumor	TCGA-IB-A5SO-01A	1	Not Reported	9ec045e9-52cb-42c9-be4f-cc44615b6aff	Primary Tumor	Not Reported	252	released	240	NA	F2ED454A-150F-4114-A0FA-43B2705AAA02	TCGA-IB-A5SO	NA	TRUE	NA	FALSE	Not Reported	No	Stage IIB	0	not reported	Head of pancreas	329	26129	Infiltrating duct carcinoma, NOS	no	2012	No	7th	T3	2000-03-01	N1	M0	not reported	da03ffa1-4ea3-5741-8593-8c3866bad03c	C25.0	Head of pancreas	not reported	not reported	NA	No	5000e1ea-8ef9-5f9f-ab45-ab17fc7d4540	NA	NA
TCGA-HZ-A9TJ-06A-11R-A41B-07	TCGA-HZ-A9TJ-06A-11R-A41B-07	TCGA-HZ-A9TJ	TCGA-HZ-A9TJ-06A	TM	Metastatic	TCGA-HZ-A9TJ-06A	6	Not Reported	6330144b-5365-400b-a0ca-fbb5c86a3759	Metastatic	Not Reported	127	released	50	NA	97E6278D-5ACD-470C-847D-D882EA709B28	TCGA-HZ-A9TJ	NA	FALSE	NA	FALSE	Not Reported	No	Stage IV	0	not reported	Tail of pancreas	603	25849	Adenocarcinoma, NOS	no	2013	No	7th	T3	1940-03-01	N0	M1	not reported	99e77304-bed0-5535-bd62-abc7701ebbc7	C25.2	Tail of pancreas	not reported	not reported	NA	No	48c01a88-afc3-5f62-8e44-9c81b186f465	NA	NA
TCGA-3A-A9J0-01A-11R-A41B-07	TCGA-3A-A9J0-01A-11R-A41B-07	TCGA-3A-A9J0	TCGA-3A-A9J0-01A	TP	Primary solid Tumor	TCGA-3A-A9J0-01A	1	Not Reported	80020317-7212-4a7b-a30a-9875d23e1a10	Primary Tumor	Not Reported	408	released	50	NA	0FEC454A-9BE2-4538-A74B-4BE531410B6D	TCGA-3A-A9J0	NA	TRUE	NA	FALSE	Not Reported	No	Stage IIB	0	not reported	Head of pancreas	743	27453	Infiltrating duct carcinoma, NOS	no	2012	No	7th	T3	2000-03-01	N1	MX	not reported	6530a774-74fe-5c9f-ae14-ba9e543d411a	C25.0	Head of pancreas	not reported	not reported	NA	No	bc2c3c00-6adf-5075-8fce-353209a5c71b	NA	NA
TCGA-2J-AABP-01A-11R-A41B-07	TCGA-2J-AABP-01A-11R-A41B-07	TCGA-2J-AABP	TCGA-2J-AABP-01A	TP	Primary solid Tumor	TCGA-2J-AABP-01A	1	Not Reported	be6085d3-e73b-4e26-b7d3-f768072592bb	Primary Tumor	Not Reported	237	released	90	NA	1AB545A6-DC90-47E9-8112-DD094F6BCD02	TCGA-2J-AABP	NA	TRUE	NA	FALSE	Not Reported	No	Stage IIB	0	not reported	Tail of pancreas	463	21484	Carcinoma, undifferentiated, NOS	no	2013	No	7th	T3	2024-03-20	N1	M0	not reported	2c980335-e397-5c6f-a13b-74ad977f3f66	C25.0	Tail of pancreas	not reported	not reported	NA	Yes	b34fd3de-6814-5d92-96c0-04bfbd10e7d9	NA	NA
TCGA-US-A776-01A-13R-A33R-07	TCGA-US-A776-01A-13R-A33R-07	TCGA-US-A776	TCGA-US-A776-01A	TP	Primary solid Tumor	TCGA-US-A776-01A	1	Not Reported	ef5e9a09-b1cc-4ca0-9e67-5415ab8cbc6e	Primary Tumor	Not Reported	693	released	570	NA	A34AB133-F144-42E4-AC61-505B8DA9554F	TCGA-US-A776	NA	TRUE	NA	FALSE	Not Reported	No	Stage IIA	0	not reported	Head of pancreas	1216	22283	Mucinous adenocarcinoma	no	2011	No	7th	T3	1980-03-01	N0	MX	not reported	8eaf36ee-1c16-5532-817b-2329abceaaca	C25.0	Head of pancreas	not reported	not reported	NA	Yes	252a24d5-94b9-537c-a16a-5ebcc19bf02c	NA	NA
TCGA-HV-A5A3-01A-11R-A26U-07	TCGA-HV-A5A3-01A-11R-A26U-07	TCGA-HV-A5A3	TCGA-HV-A5A3-01A	TP	Primary solid Tumor	TCGA-HV-A5A3-01A	1	Not Reported	975ba0d6-92b7-46f8-a564-f852554e706e	Primary Tumor	Not Reported	226	released	20	NA	5576957F-3101-44C5-9CFB-AF8194453174	TCGA-HV-A5A3	NA	FALSE	NA	FALSE	Not Reported	No	Stage IIA	0	not reported	Body of pancreas	NA	18475	Infiltrating duct carcinoma, NOS	no	2012	No	7th	T3	2000-03-01	NX	MX	not reported	043f6833-85a3-5fca-829c-7301f738cc79	C25.1	Body of pancreas	not reported	not reported	NA	Yes	bd222ef7-4e46-5466-bc72-d616ea1165b6	NA	NA
TCGA-HZ-A77Q-01A-11R-A36G-07	TCGA-HZ-A77Q-01A-11R-A36G-07	TCGA-HZ-A77Q	TCGA-HZ-A77Q-01A	TP	Primary solid Tumor	TCGA-HZ-A77Q-01A	1	Not Reported	bfa00b71-57ec-4cfe-8627-86fe0e66492e	Primary Tumor	Not Reported	78	released	80	NA	D550175A-9593-4283-94D5-91268C8D7799	TCGA-HZ-A77Q	NA	TRUE	NA	FALSE	Not Reported	No	Stage IIB	0	not reported	Head of pancreas	33	20366	Adenocarcinoma, NOS	yes	2013	No	7th	T3	1940-03-01	N1	MX	not reported	19154b3c-98f8-5678-b489-2b7b1614d3d3	C25.0	Head of pancreas	not reported	not reported	0.821918	No	878b67e5-0247-5194-a25c-e063c7da70ba	NA	15
TCGA-H6-8124-11A-01R-2404-07	TCGA-H6-8124-11A-01R-2404-07	TCGA-H6-8124	TCGA-H6-8124-11A	NT	Solid Tissue Normal	TCGA-H6-8124-11A	11	Not Reported	0fc0fe04-ddc5-4b20-a3fc-5f2fcdff6782	Solid Tissue Normal	Not Reported	NA	released	NA	0.5	NA	TCGA-H6-8124	0.3	NA	1.3	FALSE	Not Reported	No	Stage IIB	0	not reported	Head of pancreas	392	20741	Adenocarcinoma, NOS	no	2011	No	7th	T3	1940-03-01	N1	M0	not reported	f3bb3561-e57f-508f-8ca1-a3f2c3db8a07	C25.0	Head of pancreas	not reported	not reported	0.191781	Yes	3e3f32cc-6fb3-51d8-b682-333c4804adbc	7	3.5
TCGA-2J-AAB9-01A-11R-A41B-07	TCGA-2J-AAB9-01A-11R-A41B-07	TCGA-2J-AAB9	TCGA-2J-AAB9-01A	TP	Primary solid Tumor	TCGA-2J-AAB9-01A	1	Not Reported	02884cc4-f047-4d54-8389-b835e7707958	Primary Tumor	Not Reported	560	released	140	NA	6E92E34F-4CB2-497C-8F3A-CF959CCF26CA	TCGA-2J-AAB9	NA	TRUE	NA	FALSE	Not Reported	No	Stage IIB	0	not reported	Head of pancreas	NA	25920	Infiltrating duct carcinoma, NOS	no	2012	No	7th	T3	2000-03-01	N1	M0	not reported	45ea447a-71fe-59bc-8163-fe3e20f6ae5e	C25.0	Head of pancreas	not reported	not reported	NA	Yes	290830e3-ae50-557b-8eca-1005ddcb16a8	NA	NA
TCGA-IB-A5SP-01A-11R-A32O-07	TCGA-IB-A5SP-01A-11R-A32O-07	TCGA-IB-A5SP	TCGA-IB-A5SP-01A	TP	Primary solid Tumor	TCGA-IB-A5SP-01A	1	Not Reported	e116a129-7ef0-4e24-97c1-3e817b02d964	Primary Tumor	Not Reported	397	released	240	NA	FFEF1962-F903-4C41-A6D2-8DEF0BD35F55	TCGA-IB-A5SP	NA	TRUE	NA	FALSE	Not Reported	No	Stage IIA	0	not reported	Head of pancreas	482	28317	Infiltrating duct carcinoma, NOS	no	2011	No	7th	T3	2000-03-01	N0	M0	not reported	2b47a812-5c28-5e50-bee4-a73b9aa4e5d7	C25.0	Head of pancreas	not reported	not reported	NA	Yes	247a93af-7b11-55e1-a3b4-ea13e59e03b8	NA	NA
TCGA-PZ-A5RE-01A-11R-A32O-07	TCGA-PZ-A5RE-01A-11R-A32O-07	TCGA-PZ-A5RE	TCGA-PZ-A5RE-01A	TP	Primary solid Tumor	TCGA-PZ-A5RE-01A	1	Not Reported	be7e2197-4c7c-4ab5-a003-940054104848	Primary Tumor	Not Reported	115	released	260	NA	ABDE8ADA-A016-48A6-89F6-AC3BCB79B943	TCGA-PZ-A5RE	NA	TRUE	NA	FALSE	Not Reported	No	Stage IIB	0	not reported	Head of pancreas	247	16255	Infiltrating duct carcinoma, NOS	no	2012	No	7th	T3	2000-03-01	N1	MX	not reported	046cedf6-cbb4-569f-b7a4-7ffdbc6a9eff	C25.0	Head of pancreas	not reported	not reported	NA	Not Reported	fe8002a8-de26-5d9a-97f9-ed76e890bce2	NA	NA
TCGA-FB-AAQ6-01A-11R-A41B-07	TCGA-FB-AAQ6-01A-11R-A41B-07	TCGA-FB-AAQ6	TCGA-FB-AAQ6-01A	TP	Primary solid Tumor	TCGA-FB-AAQ6-01A	1	Not Reported	405d1dc6-e63e-4af4-ab64-c9257d41fef8	Primary Tumor	Not Reported	818	released	400	NA	EF255DB8-CEE7-4882-B897-FA84696211D0	TCGA-FB-AAQ6	NA	TRUE	NA	FALSE	Not Reported	No	Stage IA	0	not reported	Tail of pancreas	NA	31319	Infiltrating duct carcinoma, NOS	yes	2011	No	7th	T1	2000-03-01	N0	MX	not reported	6ce86ac0-ec9f-5fbd-9d33-388d56b4b1b4	C25.2	Tail of pancreas	not reported	not reported	NA	Yes	4a51c177-a6f1-59e3-b51c-7fc54780bc0c	NA	NA
TCGA-RB-AA9M-01A-11R-A39D-07	TCGA-RB-AA9M-01A-11R-A39D-07	TCGA-RB-AA9M	TCGA-RB-AA9M-01A	TP	Primary solid Tumor	TCGA-RB-AA9M-01A	1	Not Reported	6a57b90f-bd7a-4d50-8585-baee5cc6f282	Primary Tumor	Not Reported	76	released	170	NA	881F2828-DD95-4773-9ADE-734812598CED	TCGA-RB-AA9M	NA	TRUE	NA	FALSE	Not Reported	No	Stage IIB	0	not reported	Tail of pancreas	286	15807	Infiltrating duct carcinoma, NOS	no	2013	No	7th	T1	2000-03-01	N1	MX	not reported	a5e3eb5d-8a7b-5478-a5a6-d3b6a290a533	C25.2	Tail of pancreas	not reported	not reported	NA	Yes	d7cbe415-93fc-59cb-adbd-f2427e8ee9fe	NA	NA
TCGA-2J-AABH-01A-21R-A41B-07	TCGA-2J-AABH-01A-21R-A41B-07	TCGA-2J-AABH	TCGA-2J-AABH-01A	TP	Primary solid Tumor	TCGA-2J-AABH-01A	1	Not Reported	56d664e4-efa9-4ff7-b600-d198e6fbdcd7	Primary Tumor	Not Reported	1061	released	130	NA	2E34BABE-5262-469C-BFFA-B75A75763381	TCGA-2J-AABH	NA	TRUE	NA	FALSE	Not Reported	No	Stage IIA	0	not reported	Body of pancreas	1287	22425	Adenocarcinoma, NOS	no	2011	No	7th	T3	1940-03-01	N0	M0	not reported	0fcab6ac-f547-57e5-a5d2-c8f84b0b0a0d	C25.1	Body of pancreas	not reported	not reported	NA	No	9314b3d6-0b77-5d0a-ac68-5178251d34b3	NA	NA
TCGA-S4-A8RM-01A-11R-A37L-07	TCGA-S4-A8RM-01A-11R-A37L-07	TCGA-S4-A8RM	TCGA-S4-A8RM-01A	TP	Primary solid Tumor	TCGA-S4-A8RM-01A	1	Not Reported	986f9084-bbb8-4afa-9d13-697dad1b7b1a	Primary Tumor	Not Reported	323	released	190	NA	4D1E4F48-60FC-4982-AF71-81859F14ABB4	TCGA-S4-A8RM	NA	TRUE	NA	FALSE	Not Reported	No	Stage IIB	0	not reported	Pancreas, NOS	737	24589	Infiltrating duct carcinoma, NOS	no	2013	No	7th	T3	2000-03-01	N1	MX	not reported	3010ecf9-f447-519e-ad3e-93afb9862957	C25.9	Pancreas, NOS	not reported	not reported	1.36986	Yes	5857ae8d-3b89-59fd-b37e-a394792e1c13	25	25
TCGA-RL-AAAS-01A-32R-A39D-07	TCGA-RL-AAAS-01A-32R-A39D-07	TCGA-RL-AAAS	TCGA-RL-AAAS-01A	TP	Primary solid Tumor	TCGA-RL-AAAS-01A	1	Not Reported	a3de4634-8acb-47de-8986-1478626464bc	Primary Tumor	Not Reported	77	released	180	NA	60731A10-B15C-49EC-96D5-05B0E023C053	TCGA-RL-AAAS	NA	FALSE	NA	FALSE	Not Reported	No	Stage IB	0	not reported	Head of pancreas	9	22126	Infiltrating duct carcinoma, NOS	no	2013	No	7th	T2	2000-03-01	N0	M0	not reported	9926f6fe-b6ae-5cfe-9068-df14de539dff	C25.0	Head of pancreas	not reported	not reported	NA	Yes	7502acf6-92a0-51e3-b55b-2d030dc9aa64	NA	NA
TCGA-2L-AAQI-01A-12R-A39D-07	TCGA-2L-AAQI-01A-12R-A39D-07	TCGA-2L-AAQI	TCGA-2L-AAQI-01A	TP	Primary solid Tumor	TCGA-2L-AAQI-01A	1	Not Reported	7b9f815b-6dd3-49c4-aded-717c366c8105	Primary Tumor	Not Reported	912	released	200	NA	25ED4E79-E39F-43A7-B2C1-94650C0F22A1	TCGA-2L-AAQI	NA	FALSE	NA	FALSE	Not Reported	No	Stage IIB	0	not reported	Head of pancreas	NA	24381	Infiltrating duct carcinoma, NOS	no	2011	No	7th	T3	2000-03-01	N1	MX	not reported	dc49e76e-0b2f-5612-9224-3d7c004f534e	C25.0	Head of pancreas	not reported	not reported	NA	Yes	64a557eb-15d6-5aaa-a87f-f812a72ba123	NA	NA
TCGA-L1-A7W4-01A-12R-A36G-07	TCGA-L1-A7W4-01A-12R-A36G-07	TCGA-L1-A7W4	TCGA-L1-A7W4-01A	TP	Primary solid Tumor	TCGA-L1-A7W4-01A	1	Not Reported	618851a2-a6c8-4a0b-b1d9-d1365309fee6	Primary Tumor	Not Reported	38	released	280	NA	9F0AF874-3063-43F9-A3E7-DBD31337C741	TCGA-L1-A7W4	NA	TRUE	NA	FALSE	Not Reported	No	Stage IIB	0	not reported	Head of pancreas	164	17821	Infiltrating duct carcinoma, NOS	no	2013	No	7th	T3	2000-03-01	N1	M0	not reported	b1cc7114-342e-511a-adae-51aaa1f765b6	C25.0	Head of pancreas	not reported	not reported	NA	Yes	ef24d2d9-4850-5c61-8c4f-3363c461612c	NA	NA
TCGA-F2-6880-01A-11R-2156-07	TCGA-F2-6880-01A-11R-2156-07	TCGA-F2-6880	TCGA-F2-6880-01A	TP	Primary solid Tumor	TCGA-F2-6880-01A	1	Not Reported	49ab06a6-0b56-488a-83f3-0f4f3cc93103	Primary Tumor	Not Reported	NA	released	NA	0.4	9795d6ce-dd3e-4c89-8295-37266f50aafd	TCGA-F2-6880	0.2	NA	0.6	FALSE	Not Reported	No	Stage IIB	0	not reported	Head of pancreas	295	25809	Adenocarcinoma, NOS	no	2009	No	6th	T3	1940-03-01	N1	M0	not reported	71ab05a9-d541-5858-8316-6e9f14ab7081	C25.0	Head of pancreas	not reported	not reported	0.821918	Yes	3397efd4-f5c7-522b-820c-c73fcdbd4941	NA	15
TCGA-HZ-7924-01A-11R-2156-07	TCGA-HZ-7924-01A-11R-2156-07	TCGA-HZ-7924	TCGA-HZ-7924-01A	TP	Primary solid Tumor	TCGA-HZ-7924-01A	1	Not Reported	e749babb-81d9-4b12-b7c7-d9c5e4926d1b	Primary Tumor	Not Reported	NA	released	NA	0.8	803bb8e5-9da4-4f72-92ae-d7cd4152a665	TCGA-HZ-7924	0.3	NA	1	FALSE	Not Reported	No	Stage IIA	0	not reported	Head of pancreas	840	22090	Infiltrating duct carcinoma, NOS	no	2011	No	7th	T3	2000-03-01	N0	MX	not reported	df7920ac-23aa-5266-b01d-a708aa95bbef	C25.0	Head of pancreas	not reported	not reported	NA	No	0099baf1-f89f-5cc0-91d8-8e82b75e22c9	NA	NA
TCGA-FB-A545-01A-11R-A26U-07	TCGA-FB-A545-01A-11R-A26U-07	TCGA-FB-A545	TCGA-FB-A545-01A	TP	Primary solid Tumor	TCGA-FB-A545-01A	1	Not Reported	a0d91446-24ea-4973-8d50-e080fe8bfab2	Primary Tumor	Not Reported	65	released	390	NA	6DECAD9C-5059-4201-89EC-07F2062ED6A3	TCGA-FB-A545	NA	TRUE	NA	FALSE	Not Reported	No	Stage IIB	0	not reported	Body of pancreas	385	26635	Infiltrating duct carcinoma, NOS	no	2012	No	7th	T3	2000-03-01	N1	M0	not reported	5f52fd4b-1bc9-58e9-849d-4ce2378c1049	C25.1	Body of pancreas	not reported	not reported	NA	No	4ea6f25a-769f-5e55-9fb8-c303eec030e2	NA	NA
TCGA-3E-AAAZ-01A-11R-A38C-07	TCGA-3E-AAAZ-01A-11R-A38C-07	TCGA-3E-AAAZ	TCGA-3E-AAAZ-01A	TP	Primary solid Tumor	TCGA-3E-AAAZ-01A	1	Not Reported	34cd4dff-b028-4322-8148-c206ca4024c0	Primary Tumor	Not Reported	2095	released	180	NA	5926864C-FE49-45B2-80A9-0A0C0D0FD296	TCGA-3E-AAAZ	NA	TRUE	NA	FALSE	Not Reported	No	Stage IIA	0	not reported	Head of pancreas	NA	26234	Infiltrating duct carcinoma, NOS	no	2008	No	6th	T3	2000-03-01	N0	MX	not reported	9f9cb0c7-a173-5ab6-a5de-19d4010732ad	C25.0	Head of pancreas	not reported	not reported	NA	Not Reported	f55fe5c0-202f-5071-ae03-c60ece6ffc3d	NA	NA
TCGA-2J-AABO-01A-21R-A41B-07	TCGA-2J-AABO-01A-21R-A41B-07	TCGA-2J-AABO	TCGA-2J-AABO-01A	TP	Primary solid Tumor	TCGA-2J-AABO-01A	1	Not Reported	976852dd-7592-46ea-b1a4-6b5b70d20a87	Primary Tumor	Not Reported	314	released	160	NA	947FC080-A75D-4D6B-9585-D5204266EF3F	TCGA-2J-AABO	NA	TRUE	NA	FALSE	Not Reported	No	Stage IIB	0	not reported	Head of pancreas	440	15869	Infiltrating duct carcinoma, NOS	no	2013	No	7th	T3	2000-03-01	N1	M0	not reported	bda22dc0-6eb1-5178-9c1a-6cb59152c699	C25.0	Head of pancreas	not reported	not reported	0.410959	No	6562ab18-0fdd-5331-b47b-16be2f66bbfe	10	7.5
TCGA-HZ-A9TJ-01A-11R-A41I-07	TCGA-HZ-A9TJ-01A-11R-A41I-07	TCGA-HZ-A9TJ	TCGA-HZ-A9TJ-01A	TP	Primary solid Tumor	TCGA-HZ-A9TJ-01A	1	Not Reported	599da307-d973-4ad7-b7ce-daa3ba62fe77	Primary Tumor	Not Reported	127	released	60	NA	B75112DD-F928-44E2-9379-F38B1E8FDB50	TCGA-HZ-A9TJ	NA	FALSE	NA	FALSE	Not Reported	No	Stage IV	0	not reported	Tail of pancreas	603	25849	Adenocarcinoma, NOS	no	2013	No	7th	T3	1940-03-01	N0	M1	not reported	99e77304-bed0-5535-bd62-abc7701ebbc7	C25.2	Tail of pancreas	not reported	not reported	NA	No	48c01a88-afc3-5f62-8e44-9c81b186f465	NA	NA
TCGA-S4-A8RO-01A-12R-A37L-07	TCGA-S4-A8RO-01A-12R-A37L-07	TCGA-S4-A8RO	TCGA-S4-A8RO-01A	TP	Primary solid Tumor	TCGA-S4-A8RO-01A	1	Not Reported	944e1c7d-5b7c-4e4c-9fd1-108c937580a0	Primary Tumor	Not Reported	199	released	460	NA	5E00B061-17CC-4BF0-A5FA-9DE01160DAD5	TCGA-S4-A8RO	NA	TRUE	NA	FALSE	Not Reported	No	Stage IIB	0	not reported	Head of pancreas	525	27645	Infiltrating duct carcinoma, NOS	yes	2013	No	7th	T3	2000-03-01	N1	MX	not reported	a93232fa-1826-5901-b773-d859d47364ac	C25.0	Head of pancreas	not reported	not reported	NA	Yes	68d39060-8c59-5b60-8829-14fd5b831fb2	NA	NA
TCGA-IB-7891-01A-11R-2204-07	TCGA-IB-7891-01A-11R-2204-07	TCGA-IB-7891	TCGA-IB-7891-01A	TP	Primary solid Tumor	TCGA-IB-7891-01A	1	Not Reported	bf1308ad-0ccf-4f0a-b4f7-d00a18330c98	Primary Tumor	Not Reported	NA	released	NA	0.8	1c80a890-16cd-445f-92ae-811da23d6dfb	TCGA-IB-7891	0.2	NA	0.9	FALSE	Not Reported	No	Stage IIB	0	not reported	Pancreas, NOS	648	18202	Infiltrating duct carcinoma, NOS	no	2011	No	7th	T3	2000-03-01	N1	M0	not reported	6c8614aa-6835-5374-8d92-9580f403dc81	C25.9	Pancreas, NOS	not reported	not reported	1.58904	Yes	3c76bf01-dd10-553d-ba26-d0568ed7202c	29	29
TCGA-IB-AAUQ-01A-22R-A41I-07	TCGA-IB-AAUQ-01A-22R-A41I-07	TCGA-IB-AAUQ	TCGA-IB-AAUQ-01A	TP	Primary solid Tumor	TCGA-IB-AAUQ-01A	1	Not Reported	847869f0-b61c-4a87-9eb2-6c3d2f19391f	Primary Tumor	Not Reported	79	released	240	NA	B2B5526A-ADC6-4F65-B5B2-6B0E895968FF	TCGA-IB-AAUQ	NA	TRUE	NA	FALSE	Not Reported	No	Stage IIB	0	not reported	Tail of pancreas	NA	18315	Infiltrating duct carcinoma, NOS	no	2013	No	7th	T3	2000-03-01	N1	M0	not reported	f159a0dd-649a-56af-8646-5ec855cfa227	C25.2	Tail of pancreas	not reported	not reported	3.78082	Yes	b00d6836-2d56-5165-887f-1e757882ed99	23	69
TCGA-FB-AAPY-01A-11R-A41B-07	TCGA-FB-AAPY-01A-11R-A41B-07	TCGA-FB-AAPY	TCGA-FB-AAPY-01A	TP	Primary solid Tumor	TCGA-FB-AAPY-01A	1	Not Reported	35b924a7-0b6c-47cc-98c6-732a0711e33a	Primary Tumor	Not Reported	2248	released	60	NA	BE077658-3286-455B-A84E-87CEA81BEF59	TCGA-FB-AAPY	NA	TRUE	NA	FALSE	Not Reported	No	Stage IIB	0	not reported	Head of pancreas	NA	26085	Infiltrating duct carcinoma, NOS	no	2007	No	7th	T2	2000-03-01	N1	MX	not reported	a78ec604-8729-53e5-94ea-877fad3d793e	C25.0	Head of pancreas	not reported	not reported	1.36986	Yes	d7758447-2682-507d-9642-cf60b414a27a	25	25
TCGA-S4-A8RP-01A-11R-A36G-07	TCGA-S4-A8RP-01A-11R-A36G-07	TCGA-S4-A8RP	TCGA-S4-A8RP-01A	TP	Primary solid Tumor	TCGA-S4-A8RP-01A	1	Not Reported	7d8aeea9-463c-4a73-ad77-614887041c08	Primary Tumor	Not Reported	1130	released	140	NA	0E847270-2C5B-4C8E-BEAB-605FFDF518DF	TCGA-S4-A8RP	NA	TRUE	NA	FALSE	Not Reported	No	Stage IIB	0	not reported	Head of pancreas	NA	28353	Infiltrating duct carcinoma, NOS	no	2010	No	7th	T3	2000-03-01	N1	MX	not reported	ffbc5e00-c3ed-526f-af5c-91db4e3c2467	C25.0	Head of pancreas	not reported	not reported	1.42466	Yes	fcdce284-2770-54cc-8ead-c1106f2fe577	NA	26
TCGA-FB-AAQ1-01A-12R-A41B-07	TCGA-FB-AAQ1-01A-12R-A41B-07	TCGA-FB-AAQ1	TCGA-FB-AAQ1-01A	TP	Primary solid Tumor	TCGA-FB-AAQ1-01A	1	Not Reported	b9ce8e4c-9d4d-4caa-9c73-3647ebd1f585	Primary Tumor	Not Reported	1091	released	660	NA	7909A98D-8096-46D7-9CE8-94E258BDEF2F	TCGA-FB-AAQ1	NA	TRUE	NA	FALSE	Not Reported	No	Stage IIB	0	not reported	Head of pancreas	NA	18172	Infiltrating duct carcinoma, NOS	no	2011	No	7th	T3	2000-03-01	N1	MX	not reported	3df7ecaa-ade0-521d-a8c4-a83a75aef807	C25.0	Head of pancreas	not reported	not reported	NA	No	f75f8eb5-6a63-5de3-a1e3-7ccf710928d7	NA	NA
TCGA-M8-A5N4-01A-11R-A26U-07	TCGA-M8-A5N4-01A-11R-A26U-07	TCGA-M8-A5N4	TCGA-M8-A5N4-01A	TP	Primary solid Tumor	TCGA-M8-A5N4-01A	1	Not Reported	bd1cffc7-dc9d-45d0-9eb7-9338132e715f	Primary Tumor	Not Reported	NA	released	150	NA	DA73BF07-6A4B-472E-8164-486504B8A516	TCGA-M8-A5N4	NA	FALSE	NA	FALSE	Not Reported	No	Stage IIA	NA	not reported	Head of pancreas	584	17628	Infiltrating duct carcinoma, NOS	no	NA	No	6th	T3	2000-03-01	N0	M0	not reported	6c01a81f-1c4f-5086-968e-f84bc4b19b80	C25.0	Head of pancreas	not reported	not reported	NA	Yes	b29a4d84-45b1-5583-96cb-b17924d5638c	NA	NA
TCGA-FB-AAPZ-01A-11R-A41B-07	TCGA-FB-AAPZ-01A-11R-A41B-07	TCGA-FB-AAPZ	TCGA-FB-AAPZ-01A	TP	Primary solid Tumor	TCGA-FB-AAPZ-01A	1	Not Reported	b537c629-417d-48d6-a847-df3793473de9	Primary Tumor	Not Reported	1882	released	240	NA	8A05CF44-CB88-4554-BFE0-1C7DBEC53C6A	TCGA-FB-AAPZ	NA	TRUE	NA	FALSE	Not Reported	No	Stage IIB	0	not reported	Head of pancreas	716	19847	Infiltrating duct carcinoma, NOS	no	2008	No	7th	T2	2000-03-01	N1	MX	not reported	5d2544ab-3a22-552d-85c4-fd7215f06d4c	C25.0	Head of pancreas	not reported	not reported	NA	No	958ca895-dc7c-52b6-afeb-3070bddf9ca0	NA	NA
TCGA-3A-A9IS-01A-21R-A39D-07	TCGA-3A-A9IS-01A-21R-A39D-07	TCGA-3A-A9IS	TCGA-3A-A9IS-01A	TP	Primary solid Tumor	TCGA-3A-A9IS-01A	1	Not Reported	405b467e-41d2-4af1-8544-7b74d36deebd	Primary Tumor	Not Reported	1141	released	80	NA	BC3170CA-A046-4D78-9CC6-36C5B70A9C4C	TCGA-3A-A9IS	NA	TRUE	NA	FALSE	Not Reported	No	Stage IB	0	not reported	Body of pancreas	998	24621	Neuroendocrine carcinoma, NOS	no	2010	No	7th	T2	1946-03-01	N0	MX	not reported	eb47980e-cc2e-5b32-bae1-62eda743daf3	C25.1	Body of pancreas	not reported	not reported	NA	No	e14a2836-d1b7-5958-b2e8-51f14a70ee03	NA	NA
TCGA-2L-AAQA-01A-21R-A38C-07	TCGA-2L-AAQA-01A-21R-A38C-07	TCGA-2L-AAQA	TCGA-2L-AAQA-01A	TP	Primary solid Tumor	TCGA-2L-AAQA-01A	1	Not Reported	d08f79b2-150a-44cf-9b8f-4b1dad26300e	Primary Tumor	Not Reported	1378	released	160	NA	8FB49D20-B880-43E5-AE84-E025D65F5A2C	TCGA-2L-AAQA	NA	FALSE	NA	FALSE	Not Reported	No	Stage IIB	0	not reported	Pancreas, NOS	NA	28074	Infiltrating duct carcinoma, NOS	no	2010	No	7th	T3	2000-03-01	N1	MX	not reported	d49d8159-df0f-53b3-a91a-5612a04d7f1d	C25.9	Pancreas, NOS	not reported	not reported	1.64384	Yes	db85405b-72dd-50e4-9aa0-f97757021e1f	NA	30
TCGA-3A-A9IN-01A-11R-A39D-07	TCGA-3A-A9IN-01A-11R-A39D-07	TCGA-3A-A9IN	TCGA-3A-A9IN-01A	TP	Primary solid Tumor	TCGA-3A-A9IN-01A	1	Not Reported	13e1f9c0-8caf-4c5c-8148-cecf8197bb53	Primary Tumor	Not Reported	2002	released	100	NA	6D70F2BD-C85B-4643-82A1-61AE8C541E63	TCGA-3A-A9IN	NA	TRUE	NA	FALSE	Not Reported	No	Stage IB	0	not reported	Body of pancreas	2084	22799	Neuroendocrine carcinoma, NOS	no	2008	No	6th	T2	1946-03-01	NX	MX	not reported	e0e80909-a453-5a9f-968b-0ad69cbfe428	C25.1	Body of pancreas	not reported	not reported	NA	Yes	5438a3ed-eeb6-56f8-b02d-175cd16ea91b	NA	NA
TCGA-IB-7647-01A-11R-2156-07	TCGA-IB-7647-01A-11R-2156-07	TCGA-IB-7647	TCGA-IB-7647-01A	TP	Primary solid Tumor	TCGA-IB-7647-01A	1	Not Reported	77fb36d2-8910-4319-b8b6-1350e2fb7d18	Primary Tumor	Not Reported	NA	released	NA	0.4	ad7daad3-3d10-4ef1-bf00-89fcf18e471f	TCGA-IB-7647	0.2	NA	1.3	FALSE	Not Reported	No	Stage IIB	0	not reported	Head of pancreas	NA	15188	Infiltrating duct carcinoma, NOS	no	2008	No	6th	T3	2000-03-01	N1	M0	not reported	002c9efa-a79e-5691-9bb6-34eff2ea2c33	C25.0	Head of pancreas	not reported	not reported	NA	Yes	be09f821-53aa-5596-9eb7-9e583e695977	NA	NA
TCGA-IB-7646-01A-11R-2156-07	TCGA-IB-7646-01A-11R-2156-07	TCGA-IB-7646	TCGA-IB-7646-01A	TP	Primary solid Tumor	TCGA-IB-7646-01A	1	Not Reported	f75b3ee2-b441-47f9-b62e-74cde20e952b	Primary Tumor	Not Reported	NA	released	NA	0.8	ce071fe4-67c4-4c5b-9829-433597e36067	TCGA-IB-7646	0.3	NA	1.5	FALSE	Not Reported	No	Stage IIB	0	not reported	Head of pancreas	NA	22148	Infiltrating duct carcinoma, NOS	no	2007	No	6th	T3	2000-03-01	N1	M0	not reported	df76d3c6-a236-5b13-a642-6ae6aa4b2946	C25.0	Head of pancreas	not reported	not reported	NA	Yes	e20216b9-afa1-52c0-8b11-78872ce2bd02	NA	NA
TCGA-3A-A9IH-01A-12R-A39D-07	TCGA-3A-A9IH-01A-12R-A39D-07	TCGA-3A-A9IH	TCGA-3A-A9IH-01A	TP	Primary solid Tumor	TCGA-3A-A9IH-01A	1	Not Reported	1ed78ad3-3960-4674-806f-667f997901d3	Primary Tumor	Not Reported	686	released	80	NA	A9D376FF-9D71-4B4F-AB05-77CD42E2EB11	TCGA-3A-A9IH	NA	TRUE	NA	FALSE	Not Reported	No	Stage IA	0	not reported	Body of pancreas	1021	24174	Infiltrating duct carcinoma, NOS	no	2012	No	7th	T1	2000-03-01	N0	MX	not reported	502a2130-658c-502c-be60-d42abfcb37cc	C25.1	Body of pancreas	not reported	not reported	NA	Yes	26973164-0527-5eaf-88d9-c8f7e13d44a8	NA	NA
TCGA-3A-A9IV-01A-11R-A41B-07	TCGA-3A-A9IV-01A-11R-A41B-07	TCGA-3A-A9IV	TCGA-3A-A9IV-01A	TP	Primary solid Tumor	TCGA-3A-A9IV-01A	1	Not Reported	34632ff6-f53f-4204-b38a-04975694bcae	Primary Tumor	Not Reported	787	released	60	NA	A0D8875D-EBF7-4D76-945F-3CDFB6B9A351	TCGA-3A-A9IV	NA	TRUE	NA	FALSE	Not Reported	No	Stage IB	0	not reported	Tail of pancreas	1103	21732	Neuroendocrine carcinoma, NOS	no	2011	No	7th	T2	1946-03-01	N0	MX	not reported	0d0a408b-9d40-5193-8ee6-a31c70746820	C25.2	Tail of pancreas	not reported	not reported	NA	Yes	1c05b187-8593-5262-8ac0-35e2d1978579	NA	NA
TCGA-2L-AAQL-01A-11R-A38C-07	TCGA-2L-AAQL-01A-11R-A38C-07	TCGA-2L-AAQL	TCGA-2L-AAQL-01A	TP	Primary solid Tumor	TCGA-2L-AAQL-01A	1	Not Reported	d8971aaa-4d51-47b7-a481-72dc9a62fa26	Primary Tumor	Not Reported	1066	released	100	NA	18A2D81F-F5CB-49AC-9885-09C8C7BA15A1	TCGA-2L-AAQL	NA	FALSE	NA	FALSE	Not Reported	No	Stage IIB	0	not reported	Head of pancreas	NA	30092	Infiltrating duct carcinoma, NOS	no	2011	No	7th	T3	2000-03-01	N1	MX	not reported	963a5a5a-45a7-5b3d-a112-1bc58e61ab46	C25.0	Head of pancreas	not reported	not reported	NA	Yes	ede8c0fb-7a1b-5a24-b566-ce37f0e8d0b7	NA	NA
TCGA-FB-AAPP-01A-12R-A41B-07	TCGA-FB-AAPP-01A-12R-A41B-07	TCGA-FB-AAPP	TCGA-FB-AAPP-01A	TP	Primary solid Tumor	TCGA-FB-AAPP-01A	1	Not Reported	279140b3-a1ac-4fed-a1aa-cba460b34ab5	Primary Tumor	Not Reported	1790	released	360	NA	BC5C078D-5731-4128-AA6D-201FBDE712BD	TCGA-FB-AAPP	NA	TRUE	NA	FALSE	Not Reported	No	Stage IIB	0	not reported	Head of pancreas	NA	26239	Infiltrating duct carcinoma, NOS	no	2009	No	7th	T3	2000-03-01	N1	MX	not reported	3ead9552-6efe-5f99-a00a-84649784bbc8	C25.0	Head of pancreas	not reported	not reported	NA	Yes	a2ad353b-211d-57ea-be8b-84d1c4323328	NA	NA
TCGA-3A-A9IO-01A-11R-A38C-07	TCGA-3A-A9IO-01A-11R-A38C-07	TCGA-3A-A9IO	TCGA-3A-A9IO-01A	TP	Primary solid Tumor	TCGA-3A-A9IO-01A	1	Not Reported	e617c3a5-4b06-44ce-ab2c-de5a05ba5647	Primary Tumor	Not Reported	1633	released	40	NA	4151276B-536F-47F2-9B97-92E79722AB68	TCGA-3A-A9IO	NA	TRUE	NA	FALSE	Not Reported	No	NA	0	not reported	Body of pancreas	1942	20451	Neuroendocrine carcinoma, NOS	no	2009	No	6th	TX	1946-03-01	NX	MX	not reported	d54628b2-4281-5a6c-893c-93634ea421e3	C25.1	Body of pancreas	not reported	not reported	NA	Yes	cad2ae00-6498-52d1-b5f8-f3335d012a14	NA	NA
TCGA-HV-A5A5-01A-11R-A26U-07	TCGA-HV-A5A5-01A-11R-A26U-07	TCGA-HV-A5A5	TCGA-HV-A5A5-01A	TP	Primary solid Tumor	TCGA-HV-A5A5-01A	1	Not Reported	a02bc992-007e-4044-8624-3b7a5326c279	Primary Tumor	Not Reported	156	released	10	NA	CB59EF73-6734-4BE4-8BBB-C24359E66FEF	TCGA-HV-A5A5	NA	FALSE	NA	FALSE	Not Reported	No	Stage IIB	0	not reported	Head of pancreas	289	22329	Infiltrating duct carcinoma, NOS	no	2012	No	7th	T3	2000-03-01	N1	M0	not reported	44af293b-d14e-547f-a8ba-d991335bd8d5	C25.0	Head of pancreas	not reported	not reported	NA	Yes	f7c0f7be-3a07-5d08-b2c6-978bc8f57be0	NA	NA
[truncated: 69 more columns]

## Sheet: Table S3
Table S3 The information of pancreatic cancer tissue microarray samples
No.	Age	Gender	Tissue	Pathological diagnosis	Grade	TNM	Stage
1	54	male	pancreas	pancreatic ductal adenocarcinom	2--3	T3N0M0	IIA
2	51	female	pancreas	pancreatic ductal adenocarcinom	2	T2N0M0	IB
3	76	female	pancreas	pancreatic ductal adenocarcinom	2--3	T3N0M0	IIA
4	61	female	pancreas	pancreatic ductal adenocarcinom	1--2	T2N0M0	IB
5	47	female	pancreas	pancreatic ductal adenocarcinom	3	T3N1M0	IIB
6	50	male	pancreas	pancreatic ductal adenocarcinom	3	T3N1M0	IIB
7	74	male	pancreas	pancreatic ductal adenocarcinom	2	T3N0M0	IIA
8	44	male	pancreas	pancreatic ductal adenocarcinom	2	T3N0M0	IIA
9	64	male	pancreas	pancreatic ductal adenocarcinom	3	T3N0M0	IIA
10	49	male	pancreas	pancreatic ductal adenocarcinom	3	T3N1M0	IIB
11	46	female	pancreas	pancreatic ductal adenocarcinom	3	T4N0M0	III
12	62	female	pancreas	pancreatic ductal adenocarcinom	3	T3N0M0	IIA

## Sheet: Table S4
Table S4 The primer sequences of qRT-PCR
Target Name	Primer
ITGAV-1	F	ATCTGTGAGGTCGAAACAGGA
	R	TGGAGCATACTCAACAGTCTTTG
ITGAV-2	F	AAT CTT CCA ATT GAG GAT ATC AC
	R	AAA ACA GCC AGT AGC AAC AAT
ITGAV-3	F	TCCAAACCACTGATGGGACT
	R	GTGACTGGTCTTCTACCCGC

## Sheet: Table S5
Table S5 The sequence of ITGAV siRNA
Name		Sequence ( 5' → 3' )
si-ITGAV-1	sence	UGCCAGCCAAUUGAAUUUGAUTT
si-ITGAV-1	antisence	AUCAAAUUCAAUUGGCUGGCATT
si-ITGAV-2	sence	AGGCUUGCAACCCAUUCUUAATT
si-ITGAV-2	antisence	UUAAGAAUGGGUUGCAAGCCUTT
si-ITGAV-3	sence	UCCACAUUGGUUACCACUAAUTT
si-ITGAV-3	antisence	AUUAGUGGUAACCAAUGUGGATT

## Sheet: Table S6
Table S6 The CNV changed genes were shared by all subclonal cell populations of PT samples
cell_group_name	gene_region_name	state	gene	chr	start	end
Epithelial.Epithelial.1.1.1.1	1-region_2	2	C1QA	1	22962999	22966101
Epithelial.Epithelial.1.1.1.1	1-region_2	2	C1QB	1	22979255	22988031
Epithelial.Epithelial.1.1.1.1	1-region_2	2	KDM1A	1	23345941	23410182
Epithelial.Epithelial.1.1.1.1	1-region_2	2	LUZP1	1	23410516	23504301
Epithelial.Epithelial.1.1.1.1	1-region_2	2	HNRNPR	1	23630264	23670829
Epithelial.Epithelial.1.1.1.1	1-region_2	2	TCEA3	1	23707554	23751233
Epithelial.Epithelial.1.1.1.1	1-region_2	2	ID3	1	23884409	23886285
Epithelial.Epithelial.1.1.1.1	1-region_2	2	RPL11	1	24018269	24022915
Epithelial.Epithelial.1.1.1.1	1-region_2	2	TCEB3	1	24069645	24088549
Epithelial.Epithelial.1.1.1.1	1-region_2	2	PITHD1	1	24104895	24114722
Epithelial.Epithelial.1.1.1.1	1-region_2	2	LYPLA2	1	24117460	24122029
Epithelial.Epithelial.1.1.1.1	1-region_2	2	GALE	1	24122089	24127271
Epithelial.Epithelial.1.1.1.1	1-region_2	2	HMGCL	1	24128375	24165110
Epithelial.Epithelial.1.1.1.1	1-region_2	2	FUCA1	1	24171567	24194784
Epithelial.Epithelial.1.1.1.1	1-region_2	2	PNRC2	1	24285599	24289952
Epithelial.Epithelial.1.1.1.1	1-region_2	2	SRSF10	1	24291294	24307417
Epithelial.Epithelial.1.1.1.1	1-region_2	2	NIPAL3	1	24742284	24799466
Epithelial.Epithelial.1.1.1.1	1-region_2	2	RCAN3	1	24829387	24867530
Epithelial.Epithelial.1.1.1.1	1-region_2	2	SRRM1	1	24958207	24999758
Epithelial.Epithelial.1.1.1.1	1-region_2	2	CLIC4	1	25071848	25170815
Epithelial.Epithelial.1.1.1.1	1-region_2	2	SYF2	1	25549170	25558993
Epithelial.Epithelial.1.1.1.1	1-region_2	2	C1orf63	1	25568728	25664704
Epithelial.Epithelial.1.1.1.1	1-region_2	2	TMEM50A	1	25664408	25688852
Epithelial.Epithelial.1.1.1.1	1-region_2	2	TMEM57	1	25757388	25826700
Epithelial.Epithelial.1.1.1.1	1-region_2	2	LDLRAP1	1	25870071	25895377
Epithelial.Epithelial.1.1.1.1	1-region_2	2	SEPN1	1	26126667	26144713
Epithelial.Epithelial.1.1.1.1	1-region_2	2	MTFR1L	1	26145131	26159432
Epithelial.Epithelial.1.1.1.1	1-region_2	2	STMN1	1	26210672	26233482
Epithelial.Epithelial.1.1.1.1	1-region_2	2	PAFAH2	1	26286258	26324648
Epithelial.Epithelial.1.1.1.1	1-region_2	2	ZNF593	1	26496362	26498551
Epithelial.Epithelial.1.1.1.1	1-region_2	2	CNKSR1	1	26503894	26516377
Epithelial.Epithelial.1.1.1.1	1-region_2	2	SH3BGRL3	1	26605667	26608007
Epithelial.Epithelial.1.1.1.1	1-region_2	2	UBXN11	1	26607819	26644854
Epithelial.Epithelial.1.1.1.1	1-region_2	2	CD52	1	26644448	26647014
Epithelial.Epithelial.1.1.1.1	1-region_2	2	DHDDS	1	26758773	26797785
Epithelial.Epithelial.1.1.1.1	1-region_2	2	HMGN2	1	26798941	26802463
Epithelial.Epithelial.1.1.1.1	1-region_2	2	RPS6KA1	1	26856252	26901521
Epithelial.Epithelial.1.1.1.1	1-region_2	2	ARID1A	1	27022524	27108595
Epithelial.Epithelial.1.1.1.1	1-region_2	2	SFN	1	27189633	27190947
Epithelial.Epithelial.1.1.1.1	1-region_2	2	GPN2	1	27202624	27216788
Epithelial.Epithelial.1.1.1.1	1-region_2	2	NUDC	1	27226729	27273353
Epithelial.Epithelial.1.1.1.1	1-region_2	2	NR0B2	1	27237980	27240457
Epithelial.Epithelial.1.1.1.1	1-region_2	2	TRNP1	1	27320198	27327389
Epithelial.Epithelial.1.1.1.1	1-region_2	2	SLC9A1	1	27425306	27493472
Epithelial.Epithelial.1.1.1.1	1-region_2	2	WDTC1	1	27561007	27635110
Epithelial.Epithelial.1.1.1.1	1-region_2	2	TMEM222	1	27648651	27662891
Epithelial.Epithelial.1.1.1.1	1-region_2	2	SYTL1	1	27668513	27680421
Epithelial.Epithelial.1.1.1.1	1-region_2	2	MAP3K6	1	27681675	27693383
Epithelial.Epithelial.1.1.1.1	1-region_2	2	WASF2	1	27730730	27816669
Epithelial.Epithelial.1.1.1.1	1-region_2	2	AHDC1	1	27860546	27930942
Epithelial.Epithelial.1.1.1.1	1-region_2	2	IFI6	1	27992572	27998729
Epithelial.Epithelial.1.1.1.1	1-region_2	2	FAM76A	1	28052490	28089633
Epithelial.Epithelial.1.1.1.1	1-region_2	2	STX12	1	28099694	28150963
Epithelial.Epithelial.1.1.1.1	1-region_2	2	PPP1R8	1	28157289	28178187
Epithelial.Epithelial.1.1.1.1	1-region_2	2	RPA2	1	28218035	28241257
Epithelial.Epithelial.1.1.1.1	1-region_2	2	DNAJC8	1	28525967	28559536
Epithelial.Epithelial.1.1.1.1	1-region_2	2	ATPIF1	1	28562620	28573417
Epithelial.Epithelial.1.1.1.1	1-region_2	2	PHACTR4	1	28696114	28826881
Epithelial.Epithelial.1.1.1.1	1-region_2	2	RCC1	1	28832455	28865812
Epithelial.Epithelial.1.1.1.1	1-region_2	2	TRNAU1AP	1	28879597	28905051
Epithelial.Epithelial.1.1.1.1	1-region_2	2	SNHG12	1	28905050	28909495
Epithelial.Epithelial.1.1.1.1	1-region_2	2	TAF12	1	28915835	28969597
Epithelial.Epithelial.1.1.1.1	1-region_2	2	YTHDF2	1	29063133	29096287
Epithelial.Epithelial.1.1.1.1	1-region_2	2	EPB41	1	29213603	29446553
Epithelial.Epithelial.1.1.1.1	1-region_2	2	SRSF4	1	29474255	29508499
Epithelial.Epithelial.1.1.1.1	1-region_2	2	MECR	1	29519385	29557454
Epithelial.Epithelial.1.1.1.1	1-region_2	2	PTPRU	1	29563028	29653325
Epithelial.Epithelial.1.1.1.1	1-region_2	2	LAPTM5	1	31205316	31230667
Epithelial.Epithelial.1.1.1.1	1-region_2	2	PUM1	1	31404353	31538838
Epithelial.Epithelial.1.1.1.1	1-region_2	2	SNRNP40	1	31732417	31769662
Epithelial.Epithelial.1.1.1.1	1-region_2	2	ZCCHC17	1	31769842	31837783
Epithelial.Epithelial.1.1.1.1	1-region_2	2	SERINC2	1	31882412	31907525
Epithelial.Epithelial.1.1.1.1	1-region_2	2	TINAGL1	1	32042116	32053288
Epithelial.Epithelial.1.1.1.1	1-region_2	2	PEF1	1	32095463	32110497
Epithelial.Epithelial.1.1.1.1	1-region_2	2	COL16A1	1	32117848	32169920
Epithelial.Epithelial.1.1.1.1	1-region_2	2	PTP4A2	1	32372022	32410457
Epithelial.Epithelial.1.1.1.1	1-region_2	2	KHDRBS1	1	32479430	32526451
Epithelial.Epithelial.1.1.1.1	1-region_2	2	KPNA6	1	32573639	32642169
Epithelial.Epithelial.1.1.1.1	1-region_2	2	TXLNA	1	32645287	32663886
Epithelial.Epithelial.1.1.1.1	1-region_2	2	TMEM234	1	32680073	32687972
Epithelial.Epithelial.1.1.1.1	1-region_2	2	EIF3I	1	32687529	32697205
Epithelial.Epithelial.1.1.1.1	1-region_2	2	LCK	1	32716840	32751766
Epithelial.Epithelial.1.1.1.1	1-region_2	2	HDAC1	1	32757687	32799236
Epithelial.Epithelial.1.1.1.1	1-region_4	4	PLK3	1	45265897	45271662
Epithelial.Epithelial.1.1.1.1	1-region_4	4	UROD	1	45477819	45481247
Epithelial.Epithelial.1.1.1.1	1-region_4	4	MUTYH	1	45794835	45806142
Epithelial.Epithelial.1.1.1.1	1-region_4	4	PRDX1	1	45976708	45988719
Epithelial.Epithelial.1.1.1.1	1-region_4	4	AKR1A1	1	46016215	46035721
Epithelial.Epithelial.1.1.1.1	1-region_4	4	NASP	1	46049518	46084566
Epithelial.Epithelial.1.1.1.1	1-region_4	4	GPBP1L1	1	46092976	46153785
Epithelial.Epithelial.1.1.1.1	1-region_4	4	TMEM69	1	46152886	46160115
Epithelial.Epithelial.1.1.1.1	1-region_4	4	TSPAN1	1	46640745	46651630
Epithelial.Epithelial.1.1.1.1	1-region_4	4	POMGNT1	1	46654354	46685977
Epithelial.Epithelial.1.1.1.1	1-region_4	4	LRRC41	1	46726868	46769280
Epithelial.Epithelial.1.1.1.1	1-region_4	4	UQCRH	1	46769303	46782448
Epithelial.Epithelial.1.1.1.1	1-region_4	4	FAAH	1	46859937	46879520
Epithelial.Epithelial.1.1.1.1	1-region_4	4	MKNK1	1	47023090	47082515
Epithelial.Epithelial.1.1.1.1	1-region_4	4	ATPAF1	1	47098409	47139539
Epithelial.Epithelial.1.1.1.1	1-region_4	4	EFCAB14	1	47124366	47184824
Epithelial.Epithelial.1.1.1.1	1-region_4	4	PDZK1IP1	1	47649265	47656716
Epithelial.Epithelial.1.1.1.1	1-region_4	4	CMPK1	1	47799469	47844511
Epithelial.Epithelial.1.1.1.1	1-region_4	4	FAF1	1	50905150	51425935
Epithelial.Epithelial.1.1.1.1	1-region_4	4	CDKN2C	1	51426417	51440305
Epithelial.Epithelial.1.1.1.1	1-region_4	4	RNF11	1	51701943	51739127
Epithelial.Epithelial.1.1.1.1	1-region_4	4	TTC39A	1	51752930	51810788
Epithelial.Epithelial.1.1.1.1	1-region_4	4	EPS15	1	51819935	51985000
Epithelial.Epithelial.1.1.1.1	1-region_4	4	OSBPL9	1	52042851	52254889
Epithelial.Epithelial.1.1.1.1	1-region_4	4	NRD1	1	52254863	52344477
Epithelial.Epithelial.1.1.1.1	1-region_4	4	RAB3B	1	52373628	52456436
Epithelial.Epithelial.1.1.1.1	1-region_4	4	TXNDC12	1	52485803	52521843
Epithelial.Epithelial.1.1.1.1	1-region_4	4	BTF3L4	1	52521797	52556388
Epithelial.Epithelial.1.1.1.1	1-region_4	4	PRPF38A	1	52870236	52886511
Epithelial.Epithelial.1.1.1.1	1-region_4	4	ZCCHC11	1	52873954	53019159
Epithelial.Epithelial.1.1.1.1	1-region_4	4	ZYG11B	1	53192126	53293014
Epithelial.Epithelial.1.1.1.1	1-region_4	4	ECHDC2	1	53361656	53392884
Epithelial.Epithelial.1.1.1.1	1-region_4	4	SCP2	1	53392901	53517375
Epithelial.Epithelial.1.1.1.1	1-region_4	4	C1orf123	1	53679771	53686289
Epithelial.Epithelial.1.1.1.1	1-region_4	4	MAGOH	1	53692564	53704282
Epithelial.Epithelial.1.1.1.1	1-region_4	4	YIPF1	1	54317392	54356407
Epithelial.Epithelial.1.1.1.1	1-region_4	4	HSPB11	1	54382247	54411602
Epithelial.Epithelial.1.1.1.1	1-region_4	4	LRRC42	1	54411750	54433841
Epithelial.Epithelial.1.1.1.1	1-region_4	4	TMEM59	1	54497347	54519177
Epithelial.Epithelial.1.1.1.1	1-region_4	4	MRPL37	1	54649714	54691137
Epithelial.Epithelial.1.1.1.1	1-region_4	4	SSBP3	1	54691105	54879152
Epithelial.Epithelial.1.1.1.1	1-region_4	4	ACOT11	1	55007930	55104865
Epithelial.Epithelial.1.1.1.1	1-region_4	4	TTC22	1	55245385	55266940
Epithelial.Epithelial.1.1.1.1	1-region_4	4	DHCR24	1	55315306	55352891
Epithelial.Epithelial.1.1.1.1	1-region_4	4	USP24	1	55532032	55680786
Epithelial.Epithelial.1.1.1.1	1-region_4	4	OMA1	1	58881056	59012474
Epithelial.Epithelial.1.1.1.1	1-region_4	4	TACSTD2	1	59041099	59043166
Epithelial.Epithelial.1.1.1.1	1-region_4	4	JUN	1	59246465	59249785
Epithelial.Epithelial.1.1.1.1	1-region_4	4	FGGY	1	59762310	60233347
Epithelial.Epithelial.1.1.1.1	1-region_4	4	HOOK1	1	60280458	60342050
Epithelial.Epithelial.1.1.1.1	1-region_4	4	NFIA	1	61330931	61928465
Epithelial.Epithelial.1.1.1.1	1-region_4	4	TM2D1	1	62146718	62191095
Epithelial.Epithelial.1.1.1.1	1-region_4	4	INADL	1	62208149	62629592
Epithelial.Epithelial.1.1.1.1	1-region_4	4	USP1	1	62901968	62917475
Epithelial.Epithelial.1.1.1.1	1-region_4	4	DOCK7	1	62920399	63153969
Epithelial.Epithelial.1.1.1.1	1-region_4	4	ITGB3BP	1	63906441	64059392
Epithelial.Epithelial.1.1.1.1	1-region_4	4	PGM1	1	64058947	64125916
Epithelial.Epithelial.1.1.1.1	1-region_4	4	JAK1	1	65298912	65432187
Epithelial.Epithelial.1.1.1.1	1-region_4	4	AK4	1	65613232	65697828
Epithelial.Epithelial.1.1.1.1	1-region_4	4	LEPROT	1	65886270	65901690
Epithelial.Epithelial.1.1.1.1	1-region_4	4	MIER1	1	67390578	67454302
Epithelial.Epithelial.1.1.1.1	1-region_4	4	SERBP1	1	67873493	67896098
Epithelial.Epithelial.1.1.1.1	1-region_4	4	GADD45A	1	68150744	68154021
Epithelial.Epithelial.1.1.1.1	1-region_4	4	GNG12	1	68167149	68299150
Epithelial.Epithelial.1.1.1.1	1-region_6	4	MRPS21	1	150266289	150281414
Epithelial.Epithelial.1.1.1.1	1-region_6	4	PRPF3	1	150293925	150325671
Epithelial.Epithelial.1.1.1.1	1-region_6	4	RPRD2	1	150335567	150449042
Epithelial.Epithelial.1.1.1.1	1-region_6	4	TARS2	1	150459887	150480078
Epithelial.Epithelial.1.1.1.1	1-region_6	4	ECM1	1	150480538	150486265
Epithelial.Epithelial.1.1.1.1	1-region_6	4	MCL1	1	150547032	150552066
Epithelial.Epithelial.1.1.1.1	1-region_6	4	ENSA	1	150573327	150602088
Epithelial.Epithelial.1.1.1.1	1-region_6	4	GOLPH3L	1	150618701	150669630
Epithelial.Epithelial.1.1.1.1	1-region_6	4	CTSS	1	150702672	150738433
Epithelial.Epithelial.1.1.1.1	1-region_6	4	ARNT	1	150782181	150849244
Epithelial.Epithelial.1.1.1.1	1-region_6	4	SETDB1	1	150898739	150937213
Epithelial.Epithelial.1.1.1.1	1-region_6	4	CERS2	1	150933059	150947479
Epithelial.Epithelial.1.1.1.1	1-region_6	4	C1orf56	1	151020216	151024462
Epithelial.Epithelial.1.1.1.1	1-region_6	4	CDC42SE1	1	151023447	151042801
Epithelial.Epithelial.1.1.1.1	1-region_6	4	GABPB2	1	151043054	151098018
Epithelial.Epithelial.1.1.1.1	1-region_6	4	SCNM1	1	151129140	151142773
Epithelial.Epithelial.1.1.1.1	1-region_6	4	VPS72	1	151142463	151167797
Epithelial.Epithelial.1.1.1.1	1-region_6	4	PIP5K1A	1	151170425	151222012
Epithelial.Epithelial.1.1.1.1	1-region_6	4	PSMD4	1	151227179	151239955
Epithelial.Epithelial.1.1.1.1	1-region_6	4	PI4KB	1	151264273	151300191
Epithelial.Epithelial.1.1.1.1	1-region_6	4	RFX5	1	151313116	151319833
Epithelial.Epithelial.1.1.1.1	1-region_6	4	SELENBP1	1	151336778	151345209
Epithelial.Epithelial.1.1.1.1	1-region_6	4	PSMB4	1	151372010	151374420
Epithelial.Epithelial.1.1.1.1	1-region_6	4	POGZ	1	151375200	151431941
Epithelial.Epithelial.1.1.1.1	1-region_6	4	CGN	1	151482986	151511168
Epithelial.Epithelial.1.1.1.1	1-region_7	5	TUFT1	1	151512781	151556059
Epithelial.Epithelial.1.1.1.1	1-region_7	5	SNX27	1	151584541	151671567
Epithelial.Epithelial.1.1.1.1	1-region_7	5	MRPL9	1	151732119	151736040
Epithelial.Epithelial.1.1.1.1	1-region_7	5	RORC	1	151778547	151804348
Epithelial.Epithelial.1.1.1.1	1-region_7	5	THEM4	1	151846060	151882284
Epithelial.Epithelial.1.1.1.1	1-region_7	5	S100A10	1	151955391	151966866
Epithelial.Epithelial.1.1.1.1	1-region_7	5	S100A11	1	152004982	152020383
Epithelial.Epithelial.1.1.1.1	1-region_7	5	SPRR1A	1	152956557	152958289
Epithelial.Epithelial.1.1.1.1	1-region_7	5	SPRR3	1	152974223	152976332
Epithelial.Epithelial.1.1.1.1	1-region_7	5	SPRR1B	1	153003678	153005376
Epithelial.Epithelial.1.1.1.1	1-region_7	5	S100A9	1	153330330	153333503
Epithelial.Epithelial.1.1.1.1	1-region_7	5	S100A8	1	153362508	153363664
Epithelial.Epithelial.1.1.1.1	1-region_7	5	S100A6	1	153507075	153508720
Epithelial.Epithelial.1.1.1.1	1-region_7	5	S100A4	1	153516089	153522612
Epithelial.Epithelial.1.1.1.1	1-region_7	5	S100A2	1	153533584	153540366
Epithelial.Epithelial.1.1.1.1	1-region_7	5	S100A16	1	153579362	153585621
Epithelial.Epithelial.1.1.1.1	1-region_7	5	S100A14	1	153586731	153589462
Epithelial.Epithelial.1.1.1.1	1-region_7	5	S100A13	1	153591263	153606568
Epithelial.Epithelial.1.1.1.1	1-region_7	5	CHTOP	1	153606525	153618782
Epithelial.Epithelial.1.1.1.1	1-region_7	5	SNAPIN	1	153631130	153634306
Epithelial.Epithelial.1.1.1.1	1-region_7	5	ILF2	1	153634512	153643524
Epithelial.Epithelial.1.1.1.1	1-region_7	5	INTS3	1	153700543	153746555
Epithelial.Epithelial.1.1.1.1	1-region_7	5	SLC27A3	1	153746830	153752633
Epithelial.Epithelial.1.1.1.1	1-region_7	5	GATAD2B	1	153777201	153895451
Epithelial.Epithelial.1.1.1.1	1-region_7	5	CRTC2	1	153920145	153931101
Epithelial.Epithelial.1.1.1.1	1-region_7	5	SLC39A1	1	153931575	153940188
Epithelial.Epithelial.1.1.1.1	1-region_7	5	CREB3L4	1	153940010	153946839
Epithelial.Epithelial.1.1.1.1	1-region_7	5	JTB	1	153946745	153950164
Epithelial.Epithelial.1.1.1.1	1-region_7	5	RAB13	1	153954127	153958834
Epithelial.Epithelial.1.1.1.1	1-region_7	5	RPS27	1	153963235	153964626
Epithelial.Epithelial.1.1.1.1	1-region_7	5	TPM3	1	154127784	154167124
Epithelial.Epithelial.1.1.1.1	1-region_7	5	C1orf43	1	154179182	154193104
Epithelial.Epithelial.1.1.1.1	1-region_8	4	UBAP2L	1	154192655	154243986
Epithelial.Epithelial.1.1.1.1	1-region_8	4	HAX1	1	154244987	154248351
Epithelial.Epithelial.1.1.1.1	1-region_8	4	IL6R	1	154377669	154441926
Epithelial.Epithelial.1.1.1.1	1-region_8	4	UBE2Q1	1	154521053	154531504
Epithelial.Epithelial.1.1.1.1	1-region_8	4	ADAR	1	154554538	154600475
Epithelial.Epithelial.1.1.1.1	1-region_8	4	PMVK	1	154897210	154909467
Epithelial.Epithelial.1.1.1.1	1-region_8	4	PBXIP1	1	154916552	154928599
Epithelial.Epithelial.1.1.1.1	1-region_8	4	PYGO2	1	154929502	154936329
Epithelial.Epithelial.1.1.1.1	1-region_8	4	SHC1	1	154934774	154946871
Epithelial.Epithelial.1.1.1.1	1-region_8	4	CKS1B	1	154947129	154951725
Epithelial.Epithelial.1.1.1.1	1-region_8	4	FLAD1	1	154955814	154965587
Epithelial.Epithelial.1.1.1.1	1-region_8	4	ZBTB7B	1	154975127	154990998
Epithelial.Epithelial.1.1.1.1	1-region_8	4	ADAM15	1	155023042	155035252
Epithelial.Epithelial.1.1.1.1	1-region_8	4	EFNA4	1	155036207	155042029
Epithelial.Epithelial.1.1.1.1	1-region_8	4	EFNA1	1	155099936	155107333
Epithelial.Epithelial.1.1.1.1	1-region_8	4	SLC50A1	1	155107820	155111329
Epithelial.Epithelial.1.1.1.1	1-region_8	4	DPM3	1	155112367	155113071
Epithelial.Epithelial.1.1.1.1	1-region_8	4	KRTCAP2	1	155141884	155145951
Epithelial.Epithelial.1.1.1.1	1-region_8	4	MUC1	1	155158300	155162707
Epithelial.Epithelial.1.1.1.1	1-region_8	4	THBS3	1	155165379	155178842
Epithelial.Epithelial.1.1.1.1	1-region_8	4	MTX1	1	155178490	155183615
Epithelial.Epithelial.1.1.1.1	1-region_8	4	GBA	1	155204243	155214490
Epithelial.Epithelial.1.1.1.1	1-region_8	4	FAM189B	1	155216996	155225274
Epithelial.Epithelial.1.1.1.1	1-region_8	4	SCAMP3	1	155225770	155232221
Epithelial.Epithelial.1.1.1.1	1-region_8	4	CLK2	1	155232659	155248282
Epithelial.Epithelial.1.1.1.1	1-region_8	4	FDPS	1	155278539	155290457
Epithelial.Epithelial.1.1.1.1	1-region_8	4	RUSC1	1	155290687	155300905
Epithelial.Epithelial.1.1.1.1	1-region_8	4	ASH1L	1	155305059	155532598
Epithelial.Epithelial.1.1.1.1	1-region_8	4	YY1AP1	1	155629237	155658791
Epithelial.Epithelial.1.1.1.1	1-region_8	4	DAP3	1	155657751	155708801
Epithelial.Epithelial.1.1.1.1	1-region_8	4	GON4L	1	155719508	155829191
Epithelial.Epithelial.1.1.1.1	1-region_8	4	RIT1	1	155867599	155881195
Epithelial.Epithelial.1.1.1.1	1-region_8	4	KIAA0907	1	155882834	155904191
Epithelial.Epithelial.1.1.1.1	1-region_8	4	ARHGEF2	1	155916630	155976861
Epithelial.Epithelial.1.1.1.1	1-region_8	4	SSR2	1	155978839	155990750
Epithelial.Epithelial.1.1.1.1	1-region_8	4	UBQLN4	1	156005092	156023585
Epithelial.Epithelial.1.1.1.1	1-region_8	4	LAMTOR2	1	156024543	156028301
Epithelial.Epithelial.1.1.1.1	1-region_8	4	RAB25	1	156030951	156040295
Epithelial.Epithelial.1.1.1.1	1-region_8	4	LMNA	1	156052364	156109880
Epithelial.Epithelial.1.1.1.1	1-region_8	4	SEMA4A	1	156117157	156147543
Epithelial.Epithelial.1.1.1.1	1-region_8	4	SLC25A44	1	156163880	156182587
Epithelial.Epithelial.1.1.1.1	1-region_8	4	PMF1	1	156182784	156212874
Epithelial.Epithelial.1.1.1.1	1-region_8	4	SMG5	1	156219015	156252620
Epithelial.Epithelial.1.1.1.1	1-region_8	4	C1orf85	1	156259880	156265463
Epithelial.Epithelial.1.1.1.1	1-region_8	4	CCT3	1	156278759	156337664
Epithelial.Epithelial.1.1.1.1	1-region_8	4	MEF2D	1	156433519	156470620
Epithelial.Epithelial.1.1.1.1	1-region_8	4	APOA1BP	1	156561554	156564091
Epithelial.Epithelial.1.1.1.1	1-region_8	4	GPATCH4	1	156564279	156571288
Epithelial.Epithelial.1.1.1.1	1-region_8	4	CRABP2	1	156669398	156675608
Epithelial.Epithelial.1.1.1.1	1-region_8	4	ISG20L2	1	156691683	156698591
Epithelial.Epithelial.1.1.1.1	1-region_8	4	RRNAD1	1	156698234	156706752
Epithelial.Epithelial.1.1.1.1	1-region_8	4	MRPL24	1	156707095	156711382
Epithelial.Epithelial.1.1.1.1	1-region_8	4	HDGF	1	156711899	156736717
Epithelial.Epithelial.1.1.1.1	1-region_8	4	PRCC	1	156720402	156770607
Epithelial.Epithelial.1.1.1.1	1-region_8	4	ETV3	1	157090983	157108266
Epithelial.Epithelial.1.1.1.1	1-region_8	4	IFI16	1	158969758	159024945
Epithelial.Epithelial.1.1.1.1	1-region_8	4	APCS	1	159557615	159558655
Epithelial.Epithelial.1.1.1.1	1-region_8	4	CRP	1	159682079	159684379
Epithelial.Epithelial.1.1.1.1	1-region_8	4	DUSP23	1	159750722	159752333
Epithelial.Epithelial.1.1.1.1	1-region_8	4	TAGLN2	1	159887897	159895522
Epithelial.Epithelial.1.1.1.1	1-region_8	4	IGSF9	1	159896829	159915386
Epithelial.Epithelial.1.1.1.1	1-region_8	4	LINC01133	1	159931008	159948851
Epithelial.Epithelial.1.1.1.1	1-region_8	4	PIGM	1	159997462	160001783
Epithelial.Epithelial.1.1.1.1	1-region_8	4	IGSF8	1	160061130	160068733
Epithelial.Epithelial.1.1.1.1	1-region_8	4	PEA15	1	160175127	160185166
Epithelial.Epithelial.1.1.1.1	1-region_8	4	DCAF8	1	160185505	160254920
Epithelial.Epithelial.1.1.1.1	1-region_8	4	PEX19	1	160246602	160256138
Epithelial.Epithelial.1.1.1.1	1-region_8	4	COPA	1	160259063	160313190
Epithelial.Epithelial.1.1.1.1	1-region_8	4	NCSTN	1	160313062	160328742
Epithelial.Epithelial.1.1.1.1	1-region_8	4	RP11-528G1.2	1	160506863	160541248
Epithelial.Epithelial.1.1.1.1	1-region_8	4	CD48	1	160648536	160681641
Epithelial.Epithelial.1.1.1.1	1-region_8	4	F11R	1	160965001	160991138
Epithelial.Epithelial.1.1.1.1	1-region_8	4	TSTD1	1	161007421	161008780
Epithelial.Epithelial.1.1.1.1	1-region_8	4	PVRL4	1	161040785	161059389
Epithelial.Epithelial.1.1.1.1	1-region_8	4	PFDN2	1	161070346	161087901
Epithelial.Epithelial.1.1.1.1	1-region_8	4	NIT1	1	161087876	161095235
Epithelial.Epithelial.1.1.1.1	1-region_8	4	DEDD	1	161090764	161102478
Epithelial.Epithelial.1.1.1.1	1-region_8	4	UFC1	1	161122566	161128646
Epithelial.Epithelial.1.1.1.1	1-region_8	4	B4GALT3	1	161141100	161147287
Epithelial.Epithelial.1.1.1.1	1-region_8	4	NDUFS2	1	161166894	161184185
Epithelial.Epithelial.1.1.1.1	1-region_8	4	FCER1G	1	161185024	161190489
Epithelial.Epithelial.1.1.1.1	1-region_8	4	SDHC	1	161284047	161332984
Epithelial.Epithelial.1.1.1.1	1-region_8	4	HSPA6	1	161494036	161496681
Epithelial.Epithelial.1.1.1.1	1-region_8	4	DUSP12	1	161719548	161727028
Epithelial.Epithelial.1.1.1.1	1-region_8	4	ATF6	1	161736084	161933860
Epithelial.Epithelial.1.1.1.1	1-region_8	4	UHMK1	1	162467041	162499419
Epithelial.Epithelial.1.1.1.1	1-region_8	4	UAP1	1	162531323	162569627
Epithelial.Epithelial.1.1.1.1	1-region_8	4	HSD17B7	1	162760492	162782607
Epithelial.Epithelial.1.1.1.1	1-region_8	4	RGS5	1	163080911	163291577
Epithelial.Epithelial.1.1.1.1	1-region_8	4	PBX1	1	164524821	164868533
Epithelial.Epithelial.1.1.1.1	1-region_8	4	MGST3	1	165600098	165631033
Epithelial.Epithelial.1.1.1.1	1-region_8	4	ALDH9A1	1	165631453	165668100
Epithelial.Epithelial.1.1.1.1	1-region_8	4	TMCO1	1	165696032	165796992
Epithelial.Epithelial.1.1.1.1	1-region_8	4	UCK2	1	165796768	165880855
Epithelial.Epithelial.1.1.1.1	1-region_8	4	POGK	1	166808681	166825581
Epithelial.Epithelial.1.1.1.1	1-region_8	4	POU2F1	1	167190066	167396582
Epithelial.Epithelial.1.1.1.1	1-region_8	4	CD247	1	167399877	167487847
Epithelial.Epithelial.1.1.1.1	1-region_8	4	CREG1	1	167498914	167523004
Epithelial.Epithelial.1.1.1.1	1-region_8	4	MPZL1	1	167690429	167761156
Epithelial.Epithelial.1.1.1.1	1-region_8	4	MPC2	1	167885967	167906278
Epithelial.Epithelial.1.1.1.1	1-region_8	4	DCAF6	1	167905021	168045081
Epithelial.Epithelial.1.1.1.1	1-region_8	4	TIPRL	1	168148171	168169950
Epithelial.Epithelial.1.1.1.1	1-region_8	4	SFT2D2	1	168195176	168222263
Epithelial.Epithelial.1.1.1.1	1-region_8	4	ATP1B1	1	169074935	169101960
Epithelial.Epithelial.1.1.1.1	1-region_10	4	PHLDA3	1	201434620	201438365
Epithelial.Epithelial.1.1.1.1	1-region_10	4	CSRP1	1	201452658	201478584
Epithelial.Epithelial.1.1.1.1	1-region_10	4	NAV1	1	201592411	201796102
Epithelial.Epithelial.1.1.1.1	1-region_10	4	IPO9	1	201798269	201853422
Epithelial.Epithelial.1.1.1.1	1-region_10	4	TIMM17A	1	201924619	201939789
Epithelial.Epithelial.1.1.1.1	1-region_10	4	RNPEP	1	201951500	201975275
Epithelial.Epithelial.1.1.1.1	1-region_10	4	RP11-465N4.4	1	201969222	201979481
Epithelial.Epithelial.1.1.1.1	1-region_10	4	ELF3	1	201977073	201986316
Epithelial.Epithelial.1.1.1.1	1-region_10	4	ARL8A	1	202102532	202113869
Epithelial.Epithelial.1.1.1.1	1-region_10	4	UBE2T	1	202300785	202311108
Epithelial.Epithelial.1.1.1.1	1-region_10	4	PPP1R12B	1	202317827	202561834
Epithelial.Epithelial.1.1.1.1	1-region_10	4	KDM5B	1	202696526	202778598
Epithelial.Epithelial.1.1.1.1	1-region_10	4	RABIF	1	202848085	202858263
Epithelial.Epithelial.1.1.1.1	1-region_10	4	KLHL12	1	202860228	202897764
Epithelial.Epithelial.1.1.1.1	1-region_10	4	ADIPOR1	1	202909951	202927700
Epithelial.Epithelial.1.1.1.1	1-region_10	4	CYB5R1	1	202930997	202936408
Epithelial.Epithelial.1.1.1.1	1-region_10	4	TMEM183A	1	202976514	202993976
Epithelial.Epithelial.1.1.1.1	1-region_10	4	BTG2	1	203274619	203278730
Epithelial.Epithelial.1.1.1.1	1-region_10	4	ATP2B4	1	203595689	203713209
Epithelial.Epithelial.1.1.1.1	1-region_10	4	ZC3H11A	1	203764782	203823252
Epithelial.Epithelial.1.1.1.1	1-region_10	4	ZBED6	1	203765437	203769686
Epithelial.Epithelial.1.1.1.1	1-region_10	4	SNRPE	1	203830731	203839678
Epithelial.Epithelial.1.1.1.1	1-region_10	4	GOLT1A	1	204167288	204183220
Epithelial.Epithelial.1.1.1.1	1-region_10	4	PLEKHA6	1	204187979	204346793
Epithelial.Epithelial.1.1.1.1	1-region_10	4	PPP1R15B	1	204372515	204380919
Epithelial.Epithelial.1.1.1.1	1-region_10	4	PIK3C2B	1	204391756	204463852
Epithelial.Epithelial.1.1.1.1	1-region_10	4	MDM4	1	204485511	204542871
Epithelial.Epithelial.1.1.1.1	1-region_10	4	RBBP5	1	205055270	205091143
Epithelial.Epithelial.1.1.1.1	1-region_10	4	LEMD1	1	205350506	205425082
Epithelial.Epithelial.1.1.1.1	1-region_10	4	CDK18	1	205473723	205501921
Epithelial.Epithelial.1.1.1.1	1-region_10	4	ELK4	1	205577071	205601090
Epithelial.Epithelial.1.1.1.1	1-region_10	4	SLC45A3	1	205626979	205649587
Epithelial.Epithelial.1.1.1.1	1-region_10	4	NUCKS1	1	205681947	205719404
Epithelial.Epithelial.1.1.1.1	1-region_10	4	SLC26A9	1	205882176	205912588
Epithelial.Epithelial.1.1.1.1	1-region_10	4	C1orf186	1	206238872	206288647
Epithelial.Epithelial.1.1.1.1	1-region_10	4	CTSE	1	206317459	206332104
Epithelial.Epithelial.1.1.1.1	1-region_10	4	SRGAP2	1	206516200	206637783
Epithelial.Epithelial.1.1.1.1	1-region_10	4	IKBKE	1	206643791	206670223
Epithelial.Epithelial.1.1.1.1	1-region_10	4	RASSF5	1	206680879	206762616
Epithelial.Epithelial.1.1.1.1	1-region_10	4	EIF2D	1	206744620	206785904
Epithelial.Epithelial.1.1.1.1	1-region_10	4	MAPKAPK2	1	206858289	206907628
Epithelial.Epithelial.1.1.1.1	1-region_10	4	PIGR	1	207101863	207119811
Epithelial.Epithelial.1.1.1.1	1-region_10	4	C1orf116	1	207191866	207206101
Epithelial.Epithelial.1.1.1.1	1-region_10	4	YOD1	1	207217194	207226325
Epithelial.Epithelial.1.1.1.1	1-region_10	4	PFKFB2	1	207222801	207254369
Epithelial.Epithelial.1.1.1.1	1-region_10	4	C4BPB	1	207262187	207273338
Epithelial.Epithelial.1.1.1.1	1-region_10	4	CD55	1	207494853	207534311
Epithelial.Epithelial.1.1.1.1	1-region_10	4	CD46	1	207925402	207968858
Epithelial.Epithelial.1.1.1.1	1-region_10	4	PLXNA2	1	208195587	208417665
Epithelial.Epithelial.1.1.1.1	1-region_10	4	MIR205HG	1	209602165	209606183
Epithelial.Epithelial.1.1.1.1	1-region_10	4	LAMB3	1	209788215	209825811
Epithelial.Epithelial.1.1.1.1	1-region_10	4	G0S2	1	209848765	209849733
Epithelial.Epithelial.1.1.1.1	1-region_10	4	TRAF3IP3	1	209929377	209955668
Epithelial.Epithelial.1.1.1.1	1-region_10	4	IRF6	1	209959036	209979465
Epithelial.Epithelial.1.1.1.1	1-region_10	4	DIEXF	1	210001352	210030910
Epithelial.Epithelial.1.1.1.1	1-region_10	4	SERTAD4-AS1	1	210404801	210407392
Epithelial.Epithelial.1.1.1.1	1-region_10	4	RCOR3	1	211431719	211489727
Epithelial.Epithelial.1.1.1.1	1-region_10	4	TRAF5	1	211499957	211548288
Epithelial.Epithelial.1.1.1.1	1-region_10	4	LINC00467	1	211556145	211605878
Epithelial.Epithelial.1.1.1.1	1-region_10	4	SLC30A1	1	211744910	211752084
Epithelial.Epithelial.1.1.1.1	1-region_10	4	LPGAT1	1	211916799	212004114
Epithelial.Epithelial.1.1.1.1	1-region_10	4	PPP2R5A	1	212458879	212535200
Epithelial.Epithelial.1.1.1.1	1-region_10	4	NENF	1	212606229	212619714
Epithelial.Epithelial.1.1.1.1	1-region_10	4	ATF3	1	212738676	212794119
Epithelial.Epithelial.1.1.1.1	1-region_10	4	NSL1	1	212899495	212965124
Epithelial.Epithelial.1.1.1.1	1-region_10	4	FLVCR1	1	213031597	213072705
Epithelial.Epithelial.1.1.1.1	1-region_10	4	ANGEL2	1	213165524	213189168
Epithelial.Epithelial.1.1.1.1	1-region_10	4	SMYD2	1	214454445	214510474
Epithelial.Epithelial.1.1.1.1	1-region_10	4	PTPN14	1	214522039	214725792
Epithelial.Epithelial.1.1.1.1	1-region_10	4	CENPF	1	214776538	214837931
Epithelial.Epithelial.1.1.1.1	1-region_10	4	KCTD3	1	215740735	215795149
Epithelial.Epithelial.1.1.1.1	1-region_10	4	GPATCH2	1	217600334	217804424
Epithelial.Epithelial.1.1.1.1	1-region_10	4	RRP15	1	218458629	218511325
Epithelial.Epithelial.1.1.1.1	1-region_10	4	LYPLAL1	1	219347186	219386207
Epithelial.Epithelial.1.1.1.1	1-region_10	4	EPRS	1	220141943	220220000
Epithelial.Epithelial.1.1.1.1	1-region_10	4	BPNT1	1	220230824	220263804
Epithelial.Epithelial.1.1.1.1	1-region_10	4	IARS2	1	220267444	220321380
Epithelial.Epithelial.1.1.1.1	1-region_10	4	RAB3GAP2	1	220321635	220445796
Epithelial.Epithelial.1.1.1.1	1-region_10	4	DUSP10	1	221874766	221915518
Epithelial.Epithelial.1.1.1.1	1-region_10	4	MIA3	1	222791428	222841354
Epithelial.Epithelial.1.1.1.1	1-region_10	4	AIDA	1	222841355	222886552
Epithelial.Epithelial.1.1.1.1	1-region_10	4	BROX	1	222885895	222908538
Epithelial.Epithelial.1.1.1.1	1-region_10	4	FAM177B	1	222910549	222924147
Epithelial.Epithelial.1.1.1.1	1-region_10	4	RP11-452F19.3	1	222988364	223010726
Epithelial.Epithelial.1.1.1.1	1-region_10	4	CAPN8	1	223711349	223853436
Epithelial.Epithelial.1.1.1.1	1-region_10	4	CAPN2	1	223889295	223963720
Epithelial.Epithelial.1.1.1.1	1-region_10	4	TP53BP2	1	223967601	224033674
Epithelial.Epithelial.1.1.1.1	1-region_10	4	FBXO28	1	224301789	224349749
Epithelial.Epithelial.1.1.1.1	1-region_10	4	DEGS1	1	224363458	224381143
Epithelial.Epithelial.1.1.1.1	1-region_10	4	CNIH4	1	224544552	224567161
Epithelial.Epithelial.1.1.1.1	1-region_10	4	WDR26	1	224572845	224624735
Epithelial.Epithelial.1.1.1.1	1-region_10	4	DNAH14	1	225083964	225586996
Epithelial.Epithelial.1.1.1.1	1-region_10	4	LBR	1	225589204	225616627
Epithelial.Epithelial.1.1.1.1	1-region_10	4	ENAH	1	225674537	225840844
Epithelial.Epithelial.1.1.1.1	1-region_10	4	SRP9	1	225965531	225978168
Epithelial.Epithelial.1.1.1.1	1-region_10	4	EPHX1	1	225997794	226033260
Epithelial.Epithelial.1.1.1.1	1-region_10	4	RP11-285F7.2	1	226028584	226034223
Epithelial.Epithelial.1.1.1.1	1-region_10	4	TMEM63A	1	226033237	226070069
Epithelial.Epithelial.1.1.1.1	1-region_10	4	LEFTY1	1	226073982	226099082
Epithelial.Epithelial.1.1.1.1	1-region_10	4	PYCR2	1	226107578	226111978
Epithelial.Epithelial.1.1.1.1	1-region_10	4	SDE2	1	226170403	226187032
Epithelial.Epithelial.1.1.1.1	1-region_10	4	H3F3A	1	226249552	226259702
Epithelial.Epithelial.1.1.1.1	1-region_10	4	ACBD3	1	226332380	226374431
Epithelial.Epithelial.1.1.1.1	1-region_10	4	PARP1	1	226548392	226595780
Epithelial.Epithelial.1.1.1.1	1-region_10	4	ADCK3	1	227085237	227175246
Epithelial.Epithelial.1.1.1.1	1-region_10	4	CDC42BPA	1	227177566	227506175
Epithelial.Epithelial.1.1.1.1	1-region_10	4	SNAP47	1	227916240	227968927
Epithelial.Epithelial.1.1.1.1	1-region_10	4	JMJD4	1	227918126	227923112
Epithelial.Epithelial.1.1.1.1	1-region_10	4	ARF1	1	228270361	228286912
Epithelial.Epithelial.1.1.1.1	1-region_10	4	C1orf35	1	228288427	228293112
Epithelial.Epithelial.1.1.1.1	1-region_10	4	MRPL55	1	228294380	228297013
Epithelial.Epithelial.1.1.1.1	1-region_10	4	GUK1	1	228327663	228336685
Epithelial.Epithelial.1.1.1.1	1-region_10	4	TRIM11	1	228581374	228594541
Epithelial.Epithelial.1.1.1.1	1-region_10	4	HIST3H2A	1	228645065	228645560
Epithelial.Epithelial.1.1.1.1	1-region_10	4	RNF187	1	228674762	228683467
Epithelial.Epithelial.1.1.1.1	1-region_10	4	RHOU	1	228870824	228882416
Epithelial.Epithelial.1.1.1.1	1-region_10	4	RAB4A	1	229406822	229441641
Epithelial.Epithelial.1.1.1.1	1-region_10	4	NUP133	1	229577045	229644103
Epithelial.Epithelial.1.1.1.1	1-region_10	4	GALNT2	1	230193536	230417870
Epithelial.Epithelial.1.1.1.1	1-region_10	4	COG2	1	230778235	230829728
Epithelial.Epithelial.1.1.1.1	1-region_10	4	CAPN9	1	230883130	230937749
Epithelial.Epithelial.1.1.1.1	1-region_10	4	C1orf198	1	230972865	231005335
Epithelial.Epithelial.1.1.1.1	1-region_10	4	ARV1	1	231114727	231136341
Epithelial.Epithelial.1.1.1.1	3-region_14	2	SETD5-AS1	3	9391373	9440263
Epithelial.Epithelial.1.1.1.1	3-region_14	2	THUMPD3	3	9404526	9428475
Epithelial.Epithelial.1.1.1.1	3-region_14	2	SETD5	3	9439299	9520924
Epithelial.Epithelial.1.1.1.1	3-region_14	2	MTMR14	3	9691117	9744077
Epithelial.Epithelial.1.1.1.1	3-region_14	2	TADA3	3	9821544	9834695
Epithelial.Epithelial.1.1.1.1	3-region_14	2	ARPC4	3	9834179	9849410
Epithelial.Epithelial.1.1.1.1	3-region_14	2	RPUSD3	3	9879533	9886286
Epithelial.Epithelial.1.1.1.1	3-region_14	2	JAGN1	3	9932238	9936033
Epithelial.Epithelial.1.1.1.1	3-region_14	2	IL17RE	3	9944296	9958086
Epithelial.Epithelial.1.1.1.1	3-region_14	2	IL17RC	3	9958758	9975314
Epithelial.Epithelial.1.1.1.1	3-region_14	2	CRELD1	3	9975506	9987097
Epithelial.Epithelial.1.1.1.1	3-region_14	2	EMC3	3	10004221	10052800
Epithelial.Epithelial.1.1.1.1	3-region_14	2	BRK1	3	10157276	10168874
Epithelial.Epithelial.1.1.1.1	3-region_14	2	VHL	3	10182692	10193904
Epithelial.Epithelial.1.1.1.1	3-region_14	2	SEC13	3	10334815	10362862
Epithelial.Epithelial.1.1.1.1	3-region_14	2	HRH1	3	11178779	11305243
Epithelial.Epithelial.1.1.1.1	3-region_14	2	ATG7	3	11313995	11599139
Epithelial.Epithelial.1.1.1.1	3-region_14	2	VGLL4	3	11597544	11762220
Epithelial.Epithelial.1.1.1.1	3-region_14	2	PPARG	3	12328867	12475855
Epithelial.Epithelial.1.1.1.1	3-region_14	2	MKRN2	3	12598513	12625212
Epithelial.Epithelial.1.1.1.1	3-region_14	2	RAF1	3	12625100	12705725
Epithelial.Epithelial.1.1.1.1	3-region_14	2	RPL32	3	12875984	12883087
Epithelial.Epithelial.1.1.1.1	3-region_14	2	IQSEC1	3	12938719	13114617
Epithelial.Epithelial.1.1.1.1	3-region_14	2	NUP210	3	13357737	13461809
Epithelial.Epithelial.1.1.1.1	3-region_14	2	HDAC11	3	13521224	13547916
Epithelial.Epithelial.1.1.1.1	3-region_14	2	CHCHD4	3	14153580	14166370
Epithelial.Epithelial.1.1.1.1	3-region_14	2	TMEM43	3	14166440	14185179
Epithelial.Epithelial.1.1.1.1	3-region_14	2	XPC	3	14186647	14220283
Epithelial.Epithelial.1.1.1.1	3-region_14	2	LSM3	3	14219858	14242619
Epithelial.Epithelial.1.1.1.1	3-region_14	2	SLC6A6	3	14444076	14530857
Epithelial.Epithelial.1.1.1.1	3-region_14	2	CCDC174	3	14693271	14714166
Epithelial.Epithelial.1.1.1.1	3-region_14	2	FGD5-AS1	3	14961854	14989931
Epithelial.Epithelial.1.1.1.1	3-region_14	2	MRPS25	3	15083967	15106842
Epithelial.Epithelial.1.1.1.1	3-region_14	2	CAPN7	3	15247659	15294425
Epithelial.Epithelial.1.1.1.1	3-region_14	2	SH3BP5	3	15296360	15382875
Epithelial.Epithelial.1.1.1.1	3-region_14	2	EAF1	3	15468862	15484120
Epithelial.Epithelial.1.1.1.1	3-region_14	2	BTD	3	15642848	15687329
Epithelial.Epithelial.1.1.1.1	3-region_14	2	ANKRD28	3	15708743	15901278
Epithelial.Epithelial.1.1.1.1	3-region_14	2	DPH3	3	16299485	16306479
Epithelial.Epithelial.1.1.1.1	3-region_14	2	OXNAD1	3	16306706	16391806
Epithelial.Epithelial.1.1.1.1	3-region_14	2	TBC1D5	3	17198654	18486309
Epithelial.Epithelial.1.1.1.1	3-region_14	2	SATB1	3	18386879	18487080
Epithelial.Epithelial.1.1.1.1	3-region_14	2	RAB5A	3	19988571	20026667
Epithelial.Epithelial.1.1.1.1	3-region_14	2	UBE2E2	3	23244511	23633284
Epithelial.Epithelial.1.1.1.1	3-region_14	2	UBE2E1	3	23847394	23932807
Epithelial.Epithelial.1.1.1.1	3-region_14	2	RPL15	3	23958036	23965183
Epithelial.Epithelial.1.1.1.1	3-region_14	2	NR1D2	3	23986751	24022109
Epithelial.Epithelial.1.1.1.1	3-region_14	2	THRB	3	24158651	24536773
Epithelial.Epithelial.1.1.1.1	3-region_14	2	TOP2B	3	25639475	25706398
Epithelial.Epithelial.1.1.1.1	3-region_14	2	NGLY1	3	25760435	25831530
Epithelial.Epithelial.1.1.1.1	3-region_14	2	SLC4A7	3	27414214	27525911
Epithelial.Epithelial.1.1.1.1	3-region_14	2	CMC1	3	28283075	28366633
Epithelial.Epithelial.1.1.1.1	3-region_14	2	AZI2	3	28356494	28390618
Epithelial.Epithelial.1.1.1.1	3-region_14	2	TGFBR2	3	30647994	30735634
Epithelial.Epithelial.1.1.1.1	3-region_14	2	STT3B	3	31574130	31679112
Epithelial.Epithelial.1.1.1.1	3-region_14	2	OSBPL10	3	31699382	32119072
Epithelial.Epithelial.1.1.1.1	3-region_14	2	GPD1L	3	32147181	32210205
Epithelial.Epithelial.1.1.1.1	3-region_14	2	CMTM8	3	32280171	32411817
Epithelial.Epithelial.1.1.1.1	3-region_14	2	CMTM7	3	32433163	32524559
Epithelial.Epithelial.1.1.1.1	3-region_14	2	CMTM6	3	32522804	32544900
Epithelial.Epithelial.1.1.1.1	3-region_14	2	DYNC1LI1	3	32567463	32612366
Epithelial.Epithelial.1.1.1.1	3-region_14	2	CNOT10	3	32726637	32815367
Epithelial.Epithelial.1.1.1.1	3-region_14	2	GLB1	3	33038100	33138722
Epithelial.Epithelial.1.1.1.1	3-region_14	2	CRTAP	3	33155471	33189265
Epithelial.Epithelial.1.1.1.1	3-region_14	2	UBP1	3	33429828	33482863
Epithelial.Epithelial.1.1.1.1	3-region_14	2	CLASP2	3	33537737	33759848
Epithelial.Epithelial.1.1.1.1	3-region_14	2	PDCD6IP	3	33839844	33911194
Epithelial.Epithelial.1.1.1.1	3-region_14	2	EPM2AIP1	3	37027357	37034795
Epithelial.Epithelial.1.1.1.1	3-region_14	2	MLH1	3	37034823	37107380
Epithelial.Epithelial.1.1.1.1	3-region_14	2	LRRFIP2	3	37094117	37225180
Epithelial.Epithelial.1.1.1.1	3-region_14	2	GOLGA4	3	37284668	37408242
Epithelial.Epithelial.1.1.1.1	3-region_14	2	CTDSPL	3	37903451	38025960
Epithelial.Epithelial.1.1.1.1	3-region_14	2	VILL	3	38029550	38048679
Epithelial.Epithelial.1.1.1.1	3-region_14	2	ACAA1	3	38144620	38178733
Epithelial.Epithelial.1.1.1.1	3-region_14	2	MYD88	3	38179969	38184513
Epithelial.Epithelial.1.1.1.1	3-region_14	2	OXSR1	3	38206580	38296979
Epithelial.Epithelial.1.1.1.1	3-region_14	2	WDR48	3	39093489	39138155
Epithelial.Epithelial.1.1.1.1	3-region_14	2	GORASP1	3	39138150	39149854
Epithelial.Epithelial.1.1.1.1	3-region_14	2	CSRNP1	3	39183346	39196053
Epithelial.Epithelial.1.1.1.1	3-region_14	2	SLC25A38	3	39424839	39438842
Epithelial.Epithelial.1.1.1.1	3-region_14	2	RPSA	3	39448180	39454033
Epithelial.Epithelial.1.1.1.1	3-region_14	2	EIF1B	3	40351175	40353915
Epithelial.Epithelial.1.1.1.1	3-region_14	2	ENTPD3-AS1	3	40355293	40494820
Epithelial.Epithelial.1.1.1.1	3-region_14	2	RPL14	3	40498783	40503861
Epithelial.Epithelial.1.1.1.1	3-region_14	2	CTNNB1	3	41236328	41301587
Epithelial.Epithelial.1.1.1.1	3-region_14	2	TRAK1	3	42055294	42267381
Epithelial.Epithelial.1.1.1.1	3-region_14	2	CCK	3	42299317	42307699
Epithelial.Epithelial.1.1.1.1	3-region_14	2	SEC22C	3	42589461	42642572
Epithelial.Epithelial.1.1.1.1	3-region_14	2	SS18L2	3	42623332	42636606
Epithelial.Epithelial.1.1.1.1	3-region_14	2	NKTR	3	42642106	42690227
Epithelial.Epithelial.1.1.1.1	3-region_14	2	HIGD1A	3	42798669	42846023
Epithelial.Epithelial.1.1.1.1	3-region_14	2	SNRK	3	43328004	43466256
Epithelial.Epithelial.1.1.1.1	3-region_14	2	ABHD5	3	43731605	43775863
Epithelial.Epithelial.1.1.1.1	3-region_14	2	TCAIM	3	44379611	44450943
Epithelial.Epithelial.1.1.1.1	3-region_14	2	KIAA1143	3	44779153	44803154
Epithelial.Epithelial.1.1.1.1	3-region_14	2	TMEM42	3	44903361	44907162
Epithelial.Epithelial.1.1.1.1	3-region_14	2	ZDHHC3	3	44956749	45017677
Epithelial.Epithelial.1.1.1.1	3-region_14	2	EXOSC7	3	45016733	45077558
Epithelial.Epithelial.1.1.1.1	3-region_14	2	CDCP1	3	45123770	45187914
Epithelial.Epithelial.1.1.1.1	3-region_14	2	SACM1L	3	45730548	45786916
Epithelial.Epithelial.1.1.1.1	3-region_14	2	SLC6A20	3	45796942	45838027
Epithelial.Epithelial.1.1.1.1	3-region_14	2	LZTFL1	3	45864808	45957534
Epithelial.Epithelial.1.1.1.1	3-region_14	2	FYCO1	3	45959396	46037316
Epithelial.Epithelial.1.1.1.1	3-region_14	2	ALS2CL	3	46710487	46735194
Epithelial.Epithelial.1.1.1.1	3-region_14	2	CCDC12	3	46963216	47023500
Epithelial.Epithelial.1.1.1.1	3-region_14	2	NBEAL2	3	47021173	47051193
Epithelial.Epithelial.1.1.1.1	3-region_14	2	SETD2	3	47057919	47205457
Epithelial.Epithelial.1.1.1.1	3-region_14	2	KIF9	3	47269516	47324941
Epithelial.Epithelial.1.1.1.1	3-region_14	2	PTPN23	3	47422501	47454931
Epithelial.Epithelial.1.1.1.1	3-region_14	2	SCAP	3	47455203	47518616
Epithelial.Epithelial.1.1.1.1	3-region_14	2	ELP6	3	47537130	47555251
Epithelial.Epithelial.1.1.1.1	3-region_14	2	SMARCC1	3	47626762	47823596
Epithelial.Epithelial.1.1.1.1	3-region_14	2	DHX30	3	47844399	47891685
Epithelial.Epithelial.1.1.1.1	3-region_14	2	MAP4	3	47892182	48130769
Epithelial.Epithelial.1.1.1.1	3-region_14	2	NME6	3	48334754	48343175
Epithelial.Epithelial.1.1.1.1	3-region_14	2	PLXNB1	3	48445261	48471594
Epithelial.Epithelial.1.1.1.1	3-region_14	2	CCDC51	3	48473574	48481866
Epithelial.Epithelial.1.1.1.1	3-region_14	2	TMA7	3	48481667	48485616
Epithelial.Epithelial.1.1.1.1	3-region_14	2	SHISA5	3	48509197	48542259
Epithelial.Epithelial.1.1.1.1	3-region_14	2	UQCRC1	3	48636435	48648409
Epithelial.Epithelial.1.1.1.1	3-region_14	2	IP6K2	3	48725436	48777786
Epithelial.Epithelial.1.1.1.1	3-region_14	2	PRKAR2A	3	48782030	48885279
Epithelial.Epithelial.1.1.1.1	3-region_14	2	ARIH2	3	48956254	49023815
Epithelial.Epithelial.1.1.1.1	3-region_14	2	P4HTM	3	49027319	49044587
Epithelial.Epithelial.1.1.1.1	3-region_14	2	WDR6	3	49044495	49053386
Epithelial.Epithelial.1.1.1.1	3-region_14	2	DALRD3	3	49052921	49059726
Epithelial.Epithelial.1.1.1.1	3-region_14	2	NDUFAF3	3	49057892	49060928
Epithelial.Epithelial.1.1.1.1	3-region_14	2	IMPDH2	3	49061758	49066841
Epithelial.Epithelial.1.1.1.1	3-region_14	2	QRICH1	3	49067140	49131796
Epithelial.Epithelial.1.1.1.1	3-region_14	2	QARS	3	49133365	49142553
Epithelial.Epithelial.1.1.1.1	3-region_14	2	LAMB2	3	49158547	49170551
Epithelial.Epithelial.1.1.1.1	3-region_14	2	USP4	3	49315264	49378145
Epithelial.Epithelial.1.1.1.1	3-region_14	2	GPX1	3	49394609	49396033
Epithelial.Epithelial.1.1.1.1	3-region_14	2	RHOA	3	49396578	49450431
Epithelial.Epithelial.1.1.1.1	3-region_14	2	TCTA	3	49449639	49453908
Epithelial.Epithelial.1.1.1.1	3-region_14	2	DAG1	3	49506146	49573048
Epithelial.Epithelial.1.1.1.1	3-region_14	2	APEH	3	49711435	49721396
Epithelial.Epithelial.1.1.1.1	3-region_14	2	MST1	3	49721380	49726934
Epithelial.Epithelial.1.1.1.1	3-region_14	2	IP6K1	3	49761727	49823975
Epithelial.Epithelial.1.1.1.1	3-region_14	2	UBA7	3	49842640	49851379
Epithelial.Epithelial.1.1.1.1	3-region_14	2	MST1R	3	49924435	49941299
Epithelial.Epithelial.1.1.1.1	3-region_14	2	RBM6	3	49977440	50137478
Epithelial.Epithelial.1.1.1.1	3-region_14	2	RBM5	3	50126341	50156454
Epithelial.Epithelial.1.1.1.1	3-region_14	2	GNAI2	3	50263724	50296787
Epithelial.Epithelial.1.1.1.1	3-region_14	2	SEMA3B	3	50304990	50314977
Epithelial.Epithelial.1.1.1.1	3-region_14	2	IFRD2	3	50325163	50330349
Epithelial.Epithelial.1.1.1.1	3-region_14	2	HYAL2	3	50355221	50360337
Epithelial.Epithelial.1.1.1.1	3-region_14	2	TUSC2	3	50357458	50365682
Epithelial.Epithelial.1.1.1.1	3-region_14	2	RASSF1	3	50367219	50378411
Epithelial.Epithelial.1.1.1.1	3-region_14	2	NPRL2	3	50384761	50388522
Epithelial.Epithelial.1.1.1.1	3-region_14	2	CYB561D2	3	50388126	50395891
Epithelial.Epithelial.1.1.1.1	3-region_14	2	TMEM115	3	50392180	50397041
Epithelial.Epithelial.1.1.1.1	3-region_14	2	HEMK1	3	50606583	50622366
Epithelial.Epithelial.1.1.1.1	3-region_14	2	MAPKAPK3	3	50648951	50686720
Epithelial.Epithelial.1.1.1.1	3-region_14	2	MANF	3	51422478	51426828
Epithelial.Epithelial.1.1.1.1	3-region_14	2	RBM15B	3	51428731	51435330
Epithelial.Epithelial.1.1.1.1	3-region_14	2	TEX264	3	51696709	51738339
Epithelial.Epithelial.1.1.1.1	3-region_14	2	RRP9	3	51967446	51975957
Epithelial.Epithelial.1.1.1.1	3-region_14	2	PARP3	3	51976361	51982883
Epithelial.Epithelial.1.1.1.1	3-region_14	2	PCBP4	3	51991470	52002426
Epithelial.Epithelial.1.1.1.1	3-region_14	2	ABHD14B	3	52002526	52017425
Epithelial.Epithelial.1.1.1.1	3-region_14	2	ABHD14A	3	52005442	52015212
Epithelial.Epithelial.1.1.1.1	3-region_14	2	ACY1	3	52009066	52023213
Epithelial.Epithelial.1.1.1.1	3-region_14	2	RPL29	3	52027616	52029958
Epithelial.Epithelial.1.1.1.1	3-region_14	2	ALAS1	3	52232102	52248343
Epithelial.Epithelial.1.1.1.1	3-region_14	2	TWF2	3	52262626	52273276
Epithelial.Epithelial.1.1.1.1	3-region_14	2	WDR82	3	52288437	52322036
Epithelial.Epithelial.1.1.1.1	3-region_14	2	GLYCTK	3	52321105	52329272
Epithelial.Epithelial.1.1.1.1	3-region_14	2	BAP1	3	52435029	52444366
Epithelial.Epithelial.1.1.1.1	3-region_14	2	NISCH	3	52489134	52527087
Epithelial.Epithelial.1.1.1.1	3-region_14	2	NT5DC2	3	52558386	52569070
Epithelial.Epithelial.1.1.1.1	3-region_14	2	SMIM4	3	52568029	52613253
Epithelial.Epithelial.1.1.1.1	3-region_14	2	PBRM1	3	52579368	52719933
Epithelial.Epithelial.1.1.1.1	3-region_14	2	GNL3	3	52715172	52728508
Epithelial.Epithelial.1.1.1.1	3-region_14	2	GLT8D1	3	52728505	52740048
Epithelial.Epithelial.1.1.1.1	3-region_14	2	SPCS1	3	52738971	52742182
Epithelial.Epithelial.1.1.1.1	3-region_14	2	SFMBT1	3	52937588	53080766
Epithelial.Epithelial.1.1.1.1	3-region_14	2	RFT1	3	53122499	53164478
Epithelial.Epithelial.1.1.1.1	3-region_14	2	PRKCD	3	53190025	53226733
Epithelial.Epithelial.1.1.1.1	3-region_14	2	TKT	3	53258723	53290068
Epithelial.Epithelial.1.1.1.1	3-region_14	2	DCP1A	3	53317447	53381654
Epithelial.Epithelial.1.1.1.1	3-region_14	2	CHDH	3	53846362	53880417
Epithelial.Epithelial.1.1.1.1	3-region_14	2	SELK	3	53918437	53926015
Epithelial.Epithelial.1.1.1.1	3-region_14	2	CCDC66	3	56591189	56655846
Epithelial.Epithelial.1.1.1.1	3-region_14	2	FAM208A	3	56654161	56717265
Epithelial.Epithelial.1.1.1.1	3-region_14	2	ARHGEF3	3	56761446	57113357
Epithelial.Epithelial.1.1.1.1	3-region_14	2	APPL1	3	57261765	57307496
Epithelial.Epithelial.1.1.1.1	3-region_14	2	PDE12	3	57542003	57552571
Epithelial.Epithelial.1.1.1.1	3-region_14	2	ARF4	3	57557090	57583947
Epithelial.Epithelial.1.1.1.1	3-region_14	2	DENND6A	3	57611184	57678816
Epithelial.Epithelial.1.1.1.1	3-region_14	2	SLMAP	3	57741177	57914895
Epithelial.Epithelial.1.1.1.1	3-region_14	2	FLNB	3	57994127	58157982
Epithelial.Epithelial.1.1.1.1	3-region_14	2	RPP14	3	58291974	58310422
Epithelial.Epithelial.1.1.1.1	3-region_14	2	PDHB	3	58413357	58419584
Epithelial.Epithelial.1.1.1.1	3-region_14	2	FAM3D	3	58619673	58652575
Epithelial.Epithelial.1.1.1.1	3-region_14	2	FHIT	3	59735036	61237133
Epithelial.Epithelial.1.1.1.1	3-region_14	2	PTPRG	3	61547243	62283288
Epithelial.Epithelial.1.1.1.1	3-region_14	2	C3orf14	3	62304648	62321888
Epithelial.Epithelial.1.1.1.1	3-region_14	2	THOC7	3	63819546	63849579
Epithelial.Epithelial.1.1.1.1	3-region_14	2	ATXN7	3	63850233	63989138
Epithelial.Epithelial.1.1.1.1	3-region_14	2	PSMD6	3	63996225	64009658
Epithelial.Epithelial.1.1.1.1	3-region_14	2	ADAMTS9	3	64501333	64673676
Epithelial.Epithelial.1.1.1.1	3-region_14	2	MAGI1	3	65339200	66024509
Epithelial.Epithelial.1.1.1.1	3-region_14	2	SLC25A26	3	66119285	66438540
Epithelial.Epithelial.1.1.1.1	3-region_14	2	LRIG1	3	66429221	66551687
Epithelial.Epithelial.1.1.1.1	3-region_14	2	SUCLG2	3	67410884	67705038
Epithelial.Epithelial.1.1.1.1	3-region_14	2	TMF1	3	69068978	69101484
Epithelial.Epithelial.1.1.1.1	3-region_14	2	UBA3	3	69103881	69129559
Epithelial.Epithelial.1.1.1.1	3-region_14	2	ARL6IP5	3	69134095	69155217
Epithelial.Epithelial.1.1.1.1	3-region_14	2	FRMD4B	3	69219141	69591734
Epithelial.Epithelial.1.1.1.1	3-region_14	2	MITF	3	69788586	70017488
Epithelial.Epithelial.1.1.1.1	3-region_14	2	FOXP1	3	71003844	71633140
Epithelial.Epithelial.1.1.1.1	3-region_14	2	RYBP	3	72420976	72496069
Epithelial.Epithelial.1.1.1.1	3-region_14	2	PPP4R2	3	73045936	73118350
Epithelial.Epithelial.1.1.1.1	3-region_14	2	GBE1	3	81538850	81811312
Epithelial.Epithelial.1.1.1.1	3-region_14	2	CHMP2B	3	87276421	87304698
Epithelial.Epithelial.1.1.1.1	3-region_14	2	CGGBP1	3	88101094	88199035
Epithelial.Epithelial.1.1.1.1	3-region_14	2	C3orf38	3	88198893	88217879
Epithelial.Epithelial.1.1.1.1	3-region_14	2	PROS1	3	93591881	93692910
Epithelial.Epithelial.1.1.1.1	3-region_14	2	MTRNR2L12	3	96335981	96337000
Epithelial.Epithelial.1.1.1.1	3-region_14	2	CRYBG3	3	97540884	97663810
Epithelial.Epithelial.1.1.1.1	3-region_14	2	MINA	3	97660662	97691301
Epithelial.Epithelial.1.1.1.1	3-region_14	2	CLDND1	3	98216756	98241910
Epithelial.Epithelial.1.1.1.1	3-region_14	2	DCBLD2	3	98514785	98620533
Epithelial.Epithelial.1.1.1.1	3-region_14	2	CMSS1	3	99536678	99897447
Epithelial.Epithelial.1.1.1.1	3-region_14	2	FILIP1L	3	99548985	99833357
Epithelial.Epithelial.1.1.1.1	3-region_14	2	TBC1D23	3	99979844	100044095
Epithelial.Epithelial.1.1.1.1	3-region_14	2	NIT2	3	100053545	100075710
Epithelial.Epithelial.1.1.1.1	3-region_14	2	TOMM70A	3	100082275	100120242
Epithelial.Epithelial.1.1.1.1	3-region_14	2	TMEM45A	3	100211463	100296288
Epithelial.Epithelial.1.1.1.1	3-region_14	2	TFG	3	100428205	100467810
Epithelial.Epithelial.1.1.1.1	3-region_14	2	ABI3BP	3	100468000	100712359
Epithelial.Epithelial.1.1.1.1	3-region_14	2	TRMT10C	3	101280706	101285290
Epithelial.Epithelial.1.1.1.1	3-region_16	4	FAIM	3	138327448	138352218
Epithelial.Epithelial.1.1.1.1	3-region_16	4	PIK3CB	3	138372860	138553780
Epithelial.Epithelial.1.1.1.1	3-region_16	4	MRPS22	3	138724648	139076065
Epithelial.Epithelial.1.1.1.1	3-region_16	4	COPB2	3	139074442	139108574
Epithelial.Epithelial.1.1.1.1	3-region_16	4	RBP2	3	139171726	139199589
Epithelial.Epithelial.1.1.1.1	3-region_16	4	RBP1	3	139236276	139258671
Epithelial.Epithelial.1.1.1.1	3-region_16	4	SLC25A36	3	140660672	140698775
Epithelial.Epithelial.1.1.1.1	3-region_16	4	ZBTB38	3	141043055	141168634
Epithelial.Epithelial.1.1.1.1	3-region_16	4	RASA2	3	141205889	141334184
Epithelial.Epithelial.1.1.1.1	3-region_16	4	RNF7	3	141457046	141466402
Epithelial.Epithelial.1.1.1.1	3-region_16	4	ATP1B3	3	141594966	141645356
Epithelial.Epithelial.1.1.1.1	3-region_16	4	TFDP2	3	141663277	141868386
Epithelial.Epithelial.1.1.1.1	3-region_16	4	GK5	3	141882414	141944449
Epithelial.Epithelial.1.1.1.1	3-region_16	4	XRN1	3	142025449	142166904
Epithelial.Epithelial.1.1.1.1	3-region_16	4	ATR	3	142168077	142297668
Epithelial.Epithelial.1.1.1.1	3-region_16	4	PLS1	3	142315229	142432506
Epithelial.Epithelial.1.1.1.1	3-region_16	4	U2SURP	3	142683339	142779567
Epithelial.Epithelial.1.1.1.1	3-region_16	4	C3orf58	3	143690640	143767561
Epithelial.Epithelial.1.1.1.1	3-region_16	4	PLOD2	3	145787227	145881440
Epithelial.Epithelial.1.1.1.1	3-region_16	4	PLSCR4	3	145910126	145968966
Epithelial.Epithelial.1.1.1.1	3-region_16	4	PLSCR1	3	146232967	146262651
Epithelial.Epithelial.1.1.1.1	3-region_16	4	CPB1	3	148508889	148577974
Epithelial.Epithelial.1.1.1.1	3-region_16	4	GYG1	3	148709128	148745419
Epithelial.Epithelial.1.1.1.1	3-region_16	4	HLTF	3	148747914	148804341
Epithelial.Epithelial.1.1.1.1	3-region_16	4	HPS3	3	148847371	148891519
Epithelial.Epithelial.1.1.1.1	3-region_16	4	CP	3	148880197	148939842
Epithelial.Epithelial.1.1.1.1	3-region_16	4	TM4SF1	3	149086809	149095652
Epithelial.Epithelial.1.1.1.1	3-region_16	4	TM4SF1-AS1	3	149095565	149104370
Epithelial.Epithelial.1.1.1.1	3-region_16	4	TM4SF4	3	149191761	149221068
Epithelial.Epithelial.1.1.1.1	3-region_16	4	WWTR1	3	149235022	149454501
Epithelial.Epithelial.1.1.1.1	3-region_16	4	COMMD2	3	149456257	149470286
Epithelial.Epithelial.1.1.1.1	3-region_16	4	RNF13	3	149530495	149679926
Epithelial.Epithelial.1.1.1.1	3-region_16	4	PFN2	3	149682691	149768575
Epithelial.Epithelial.1.1.1.1	3-region_16	4	TSC22D2	3	150126122	150184218
Epithelial.Epithelial.1.1.1.1	3-region_16	4	SERP1	3	150259781	150321015
Epithelial.Epithelial.1.1.1.1	3-region_16	4	EIF2A	3	150264465	150302029
Epithelial.Epithelial.1.1.1.1	3-region_16	4	SELT	3	150320662	150348222
Epithelial.Epithelial.1.1.1.1	3-region_16	4	SIAH2	3	150458914	150481264
Epithelial.Epithelial.1.1.1.1	3-region_16	4	AADAC	3	151531825	151546276
Epithelial.Epithelial.1.1.1.1	3-region_16	4	SUCNR1	3	151591431	151602405
Epithelial.Epithelial.1.1.1.1	3-region_16	4	MBNL1	3	151961617	152183569
Epithelial.Epithelial.1.1.1.1	3-region_16	4	RAP2B	3	152880029	152886265
Epithelial.Epithelial.1.1.1.1	3-region_16	4	DHX36	3	153990335	154042286
Epithelial.Epithelial.1.1.1.1	3-region_16	4	SLC33A1	3	155538813	155572218
Epithelial.Epithelial.1.1.1.1	3-region_16	4	GMPS	3	155588325	155661815
Epithelial.Epithelial.1.1.1.1	3-region_16	4	SSR3	3	156257929	156272973
Epithelial.Epithelial.1.1.1.1	3-region_16	4	TIPARP	3	156391024	156424559
Epithelial.Epithelial.1.1.1.1	3-region_16	4	CCNL1	3	156864297	156878549
Epithelial.Epithelial.1.1.1.1	3-region_16	4	RSRC1	3	157823644	158263519
Epithelial.Epithelial.1.1.1.1	3-region_16	4	MLF1	3	158288952	158325041
Epithelial.Epithelial.1.1.1.1	3-region_16	4	GFM1	3	158362067	158410364
Epithelial.Epithelial.1.1.1.1	3-region_16	4	LXN	3	158363611	158390482
Epithelial.Epithelial.1.1.1.1	3-region_16	4	RARRES1	3	158414681	158450485
Epithelial.Epithelial.1.1.1.1	3-region_16	4	MFSD1	3	158449987	158547508
Epithelial.Epithelial.1.1.1.1	3-region_16	4	SMC4	3	160117062	160152750
Epithelial.Epithelial.1.1.1.1	3-region_16	4	KPNA4	3	160212783	160283376
Epithelial.Epithelial.1.1.1.1	3-region_16	4	ARL14	3	160394948	160396233
Epithelial.Epithelial.1.1.1.1	3-region_16	4	NMD3	3	160822484	160971320
Epithelial.Epithelial.1.1.1.1	3-region_16	4	SPTSSB	3	161062580	161090668
Epithelial.Epithelial.1.1.1.1	3-region_16	4	PDCD10	3	167401086	167452727
Epithelial.Epithelial.1.1.1.1	3-region_16	4	GOLIM4	3	167726465	167813763
Epithelial.Epithelial.1.1.1.1	3-region_16	4	MECOM	3	168801287	169381406
Epithelial.Epithelial.1.1.1.1	3-region_16	4	MYNN	3	169490619	169507504
Epithelial.Epithelial.1.1.1.1	3-region_16	4	SEC62	3	169684423	169716161
Epithelial.Epithelial.1.1.1.1	3-region_16	4	GPR160	3	169755717	169803191
Epithelial.Epithelial.1.1.1.1	3-region_16	4	PHC3	3	169804520	169899537
Epithelial.Epithelial.1.1.1.1	3-region_16	4	PRKCI	3	169940153	170023769
Epithelial.Epithelial.1.1.1.1	3-region_16	4	SKIL	3	170075466	170114623
Epithelial.Epithelial.1.1.1.1	3-region_16	4	RPL22L1	3	170582664	170588272
Epithelial.Epithelial.1.1.1.1	3-region_16	4	EIF5A2	3	170606204	170626482
Epithelial.Epithelial.1.1.1.1	3-region_16	4	TNIK	3	170779128	171178197
Epithelial.Epithelial.1.1.1.1	3-region_16	4	PLD1	3	171318195	171528740
Epithelial.Epithelial.1.1.1.1	3-region_16	4	FNDC3B	3	171757418	172119455
Epithelial.Epithelial.1.1.1.1	3-region_16	4	TNFSF10	3	172223298	172241297
Epithelial.Epithelial.1.1.1.1	3-region_16	4	NCEH1	3	172348039	172429008
Epithelial.Epithelial.1.1.1.1	3-region_16	4	ECT2	3	172468472	172539264
Epithelial.Epithelial.1.1.1.1	3-region_16	4	NAALADL2	3	174156363	175523428
Epithelial.Epithelial.1.1.1.1	3-region_16	4	TBL1XR1	3	176737143	176915261
Epithelial.Epithelial.1.1.1.1	3-region_16	4	ZMAT3	3	178735011	178790067
Epithelial.Epithelial.1.1.1.1	3-region_16	4	PIK3CA	3	178865902	178957881
Epithelial.Epithelial.1.1.1.1	3-region_16	4	ZNF639	3	179040779	179053323
Epithelial.Epithelial.1.1.1.1	3-region_16	4	MFN1	3	179065480	179112719
Epithelial.Epithelial.1.1.1.1	3-region_16	4	ACTL6A	3	179280668	179306196
Epithelial.Epithelial.1.1.1.1	3-region_16	4	MRPL47	3	179306073	179322442
Epithelial.Epithelial.1.1.1.1	3-region_16	4	NDUFB5	3	179322478	179345435
Epithelial.Epithelial.1.1.1.1	3-region_16	4	TTC14	3	180319918	180335616
Epithelial.Epithelial.1.1.1.1	3-region_16	4	FXR1	3	180585929	180700541
Epithelial.Epithelial.1.1.1.1	3-region_16	4	DNAJC19	3	180701497	180707562
Epithelial.Epithelial.1.1.1.1	3-region_16	4	ATP11B	3	182511288	182639423
Epithelial.Epithelial.1.1.1.1	3-region_16	4	DCUN1D1	3	182655862	182703741
Epithelial.Epithelial.1.1.1.1	3-region_16	4	B3GNT5	3	182971032	183016292
Epithelial.Epithelial.1.1.1.1	3-region_16	4	KLHL24	3	183353356	183402265
Epithelial.Epithelial.1.1.1.1	3-region_16	4	YEATS2	3	183415606	183530413
Epithelial.Epithelial.1.1.1.1	3-region_16	4	PARL	3	183547173	183602721
Epithelial.Epithelial.1.1.1.1	3-region_16	4	ABCC5	3	183637722	183735803
Epithelial.Epithelial.1.1.1.1	3-region_16	4	EIF2B5	3	183852826	184402546
Epithelial.Epithelial.1.1.1.1	3-region_16	4	DVL3	3	183873176	183891398
Epithelial.Epithelial.1.1.1.1	3-region_16	4	AP2M1	3	183892477	183901879
Epithelial.Epithelial.1.1.1.1	3-region_16	4	ABCF3	3	183903811	183911800
Epithelial.Epithelial.1.1.1.1	3-region_16	4	ALG3	3	183960089	183967336
Epithelial.Epithelial.1.1.1.1	3-region_16	4	PSMD2	3	184016497	184026842
Epithelial.Epithelial.1.1.1.1	3-region_16	4	EIF4G1	3	184032283	184053146
Epithelial.Epithelial.1.1.1.1	3-region_16	4	POLR2H	3	184079506	184086384
Epithelial.Epithelial.1.1.1.1	3-region_16	4	EPHB3	3	184279572	184300197
Epithelial.Epithelial.1.1.1.1	3-region_16	4	MAGEF1	3	184428156	184429836
Epithelial.Epithelial.1.1.1.1	3-region_16	4	VPS8	3	184529931	184770402
Epithelial.Epithelial.1.1.1.1	3-region_16	4	MAP3K13	3	185000729	185206885
Epithelial.Epithelial.1.1.1.1	3-region_16	4	TMEM41A	3	185194284	185216845
Epithelial.Epithelial.1.1.1.1	3-region_16	4	LIPH	3	185224050	185270401
Epithelial.Epithelial.1.1.1.1	3-region_16	4	SENP2	3	185300284	185351339
Epithelial.Epithelial.1.1.1.1	3-region_16	4	IGF2BP2	3	185361527	185542844
Epithelial.Epithelial.1.1.1.1	3-region_16	4	TRA2B	3	185633694	185655924
Epithelial.Epithelial.1.1.1.1	3-region_16	4	ETV5	3	185764097	185828107
Epithelial.Epithelial.1.1.1.1	3-region_16	4	DNAJB11	3	186285192	186315061
Epithelial.Epithelial.1.1.1.1	3-region_16	4	EIF4A2	3	186500994	186507689
Epithelial.Epithelial.1.1.1.1	3-region_16	4	ST6GAL1	3	186648274	186796341
Epithelial.Epithelial.1.1.1.1	3-region_16	4	RPL39L	3	186838736	186898696
Epithelial.Epithelial.1.1.1.1	3-region_16	4	RTP4	3	187086120	187089864
Epithelial.Epithelial.1.1.1.1	3-region_16	4	BCL6	3	187439165	187463515
Epithelial.Epithelial.1.1.1.1	3-region_16	4	LPP	3	187871072	188608460
Epithelial.Epithelial.1.1.1.1	3-region_16	4	TPRG1	3	188665003	189043093
Epithelial.Epithelial.1.1.1.1	3-region_16	4	CLDN1	3	190023490	190040264
Epithelial.Epithelial.1.1.1.1	3-region_16	4	IL1RAP	3	190231840	190375843
Epithelial.Epithelial.1.1.1.1	3-region_16	4	CCDC50	3	191046866	191116459
Epithelial.Epithelial.1.1.1.1	3-region_16	4	OPA1	3	193310933	193415612
Epithelial.Epithelial.1.1.1.1	3-region_16	4	HES1	3	193853934	193856521
Epithelial.Epithelial.1.1.1.1	3-region_16	4	ATP13A3	3	194123401	194219093
Epithelial.Epithelial.1.1.1.1	3-region_16	4	TMEM44	3	194308402	194354418
Epithelial.Epithelial.1.1.1.1	3-region_16	4	LSG1	3	194361517	194393206
Epithelial.Epithelial.1.1.1.1	3-region_16	4	FAM43A	3	194406622	194409762
Epithelial.Epithelial.1.1.1.1	3-region_16	4	ACAP2	3	194995465	195163807
Epithelial.Epithelial.1.1.1.1	3-region_16	4	PPP1R2	3	195241221	195270209
Epithelial.Epithelial.1.1.1.1	3-region_16	4	APOD	3	195295573	195311076
Epithelial.Epithelial.1.1.1.1	3-region_16	4	LINC00969	3	195384933	195460422
Epithelial.Epithelial.1.1.1.1	3-region_16	4	MUC20	3	195447753	195467994
Epithelial.Epithelial.1.1.1.1	3-region_16	4	MUC4	3	195473636	195539148
Epithelial.Epithelial.1.1.1.1	4-region_19	4	SRD5A3	4	56212276	56239263
Epithelial.Epithelial.1.1.1.1	4-region_19	4	TMEM165	4	56262124	56319564
Epithelial.Epithelial.1.1.1.1	4-region_19	4	CLOCK	4	56294070	56413305
Epithelial.Epithelial.1.1.1.1	4-region_19	4	NMU	4	56461396	56502865
Epithelial.Epithelial.1.1.1.1	4-region_19	4	EXOC1	4	56719782	56771200
Epithelial.Epithelial.1.1.1.1	4-region_19	4	AASDH	4	57204456	57253666
Epithelial.Epithelial.1.1.1.1	4-region_19	4	PAICS	4	57301907	57327534
Epithelial.Epithelial.1.1.1.1	4-region_19	4	SRP72	4	57333081	57369839
Epithelial.Epithelial.1.1.1.1	4-region_19	4	HOPX	4	57514155	57548065
Epithelial.Epithelial.1.1.1.1	4-region_19	4	REST	4	57774075	57802010
Epithelial.Epithelial.1.1.1.1	4-region_19	4	NOA1	4	57829536	57844989
Epithelial.Epithelial.1.1.1.1	4-region_19	4	POLR2B	4	57843888	57897334
Epithelial.Epithelial.1.1.1.1	4-region_19	4	IGFBP7	4	57896939	57976551
Epithelial.Epithelial.1.1.1.1	4-region_19	4	CENPC	4	68337521	68411324
Epithelial.Epithelial.1.1.1.1	4-region_19	4	UBA6	4	68478370	68566897
Epithelial.Epithelial.1.1.1.1	4-region_19	4	YTHDC1	4	69176105	69215807
Epithelial.Epithelial.1.1.1.1	4-region_19	4	UGT2B15	4	69512348	69536346
Epithelial.Epithelial.1.1.1.1	4-region_19	4	UGT2A3	4	69794181	69817509
Epithelial.Epithelial.1.1.1.1	4-region_19	4	SULT1B1	4	70586880	70653679
Epithelial.Epithelial.1.1.1.1	4-region_19	4	ODAM	4	71062213	71070293
Epithelial.Epithelial.1.1.1.1	4-region_19	4	UTP3	4	71554196	71556267
Epithelial.Epithelial.1.1.1.1	4-region_19	4	RUFY3	4	71569921	71673032
Epithelial.Epithelial.1.1.1.1	4-region_19	4	GRSF1	4	71681499	71705662
Epithelial.Epithelial.1.1.1.1	4-region_19	4	DCK	4	71858255	71896631
Epithelial.Epithelial.1.1.1.1	4-region_19	4	SLC4A4	4	72053003	72437804
Epithelial.Epithelial.1.1.1.1	4-region_19	4	ANKRD17	4	73939093	74124515
Epithelial.Epithelial.1.1.1.1	4-region_19	4	RASSF6	4	74437267	74486348
Epithelial.Epithelial.1.1.1.1	4-region_19	4	IL8	4	74606223	74609433
Epithelial.Epithelial.1.1.1.1	4-region_19	4	CXCL6	4	74702214	74714781
Epithelial.Epithelial.1.1.1.1	4-region_19	4	CXCL1	4	74735110	74736959
Epithelial.Epithelial.1.1.1.1	4-region_19	4	CXCL5	4	74861359	74864496
Epithelial.Epithelial.1.1.1.1	4-region_19	4	CXCL3	4	74902306	74904524
Epithelial.Epithelial.1.1.1.1	4-region_19	4	CXCL2	4	74962752	74965010
Epithelial.Epithelial.1.1.1.1	4-region_19	4	MTHFD2L	4	74979891	75168816
Epithelial.Epithelial.1.1.1.1	4-region_19	4	EREG	4	75230860	75254468
Epithelial.Epithelial.1.1.1.1	4-region_19	4	AREG	4	75310851	75320726
Epithelial.Epithelial.1.1.1.1	4-region_19	4	PARM1	4	75858305	75975325
Epithelial.Epithelial.1.1.1.1	4-region_19	4	RP11-44F21.5	4	76006912	76009927
Epithelial.Epithelial.1.1.1.1	4-region_19	4	RCHY1	4	76404247	76439974
Epithelial.Epithelial.1.1.1.1	4-region_19	4	G3BP2	4	76567966	76649709
Epithelial.Epithelial.1.1.1.1	4-region_19	4	USO1	4	76649777	76735382
Epithelial.Epithelial.1.1.1.1	4-region_19	4	NAAA	4	76831809	76862204
Epithelial.Epithelial.1.1.1.1	4-region_19	4	SDAD1	4	76862103	76912115
Epithelial.Epithelial.1.1.1.1	4-region_19	4	CXCL10	4	76942273	76944650
Epithelial.Epithelial.1.1.1.1	4-region_19	4	NUP54	4	77035812	77069668
Epithelial.Epithelial.1.1.1.1	4-region_19	4	SCARB2	4	77079890	77135046
Epithelial.Epithelial.1.1.1.1	5-region_22	2	TRIO	5	14143811	14532235
Epithelial.Epithelial.1.1.1.1	5-region_22	2	ANKH	5	14704910	14871887
Epithelial.Epithelial.1.1.1.1	5-region_22	2	ZNF622	5	16451628	16465901
Epithelial.Epithelial.1.1.1.1	5-region_22	2	FAM134B	5	16473147	16617167
Epithelial.Epithelial.1.1.1.1	5-region_22	2	MYO10	5	16665395	16936372
Epithelial.Epithelial.1.1.1.1	5-region_22	2	DROSHA	5	31400604	31532303
Epithelial.Epithelial.1.1.1.1	5-region_22	2	GOLPH3	5	32124810	32174456
Epithelial.Epithelial.1.1.1.1	5-region_22	2	MTMR12	5	32227100	32313115
Epithelial.Epithelial.1.1.1.1	5-region_22	2	ZFR	5	32354456	32444867
Epithelial.Epithelial.1.1.1.1	5-region_22	2	SUB1	5	32531739	32604185
Epithelial.Epithelial.1.1.1.1	5-region_22	2	TARS	5	33440802	33469644
Epithelial.Epithelial.1.1.1.1	5-region_22	2	RAI14	5	34656342	34832732
Epithelial.Epithelial.1.1.1.1	5-region_22	2	RAD1	5	34905369	34919094
Epithelial.Epithelial.1.1.1.1	5-region_22	2	BRIX1	5	34915481	34926101
Epithelial.Epithelial.1.1.1.1	5-region_22	2	DNAJC21	5	34929698	34959069
Epithelial.Epithelial.1.1.1.1	5-region_22	2	IL7R	5	35852797	35879705
Epithelial.Epithelial.1.1.1.1	5-region_22	2	LMBRD2	5	36098514	36152063
Epithelial.Epithelial.1.1.1.1	5-region_22	2	NIPBL	5	36876861	37066515
Epithelial.Epithelial.1.1.1.1	5-region_22	2	C5orf42	5	37106330	37249530
Epithelial.Epithelial.1.1.1.1	5-region_22	2	WDR70	5	37379314	37753537
Epithelial.Epithelial.1.1.1.1	5-region_22	2	OSMR	5	38845960	38945698
Epithelial.Epithelial.1.1.1.1	5-region_22	2	RICTOR	5	38938021	39074510
Epithelial.Epithelial.1.1.1.1	5-region_22	2	FYB	5	39105338	39274630
Epithelial.Epithelial.1.1.1.1	5-region_22	2	DAB2	5	39371780	39462402
Epithelial.Epithelial.1.1.1.1	5-region_22	2	PRKAA1	5	40759481	40798476
Epithelial.Epithelial.1.1.1.1	5-region_22	2	RPL37	5	40825364	40835437
Epithelial.Epithelial.1.1.1.1	5-region_22	2	CARD6	5	40841286	40860275
Epithelial.Epithelial.1.1.1.1	5-region_22	2	C7	5	40909354	40983041
Epithelial.Epithelial.1.1.1.1	5-region_22	2	OXCT1	5	41730167	41870621
Epithelial.Epithelial.1.1.1.1	5-region_22	2	C5orf51	5	41904290	41921738
Epithelial.Epithelial.1.1.1.1	5-region_22	2	FBXO4	5	41925356	41941845
Epithelial.Epithelial.1.1.1.1	5-region_22	2	SEPP1	5	42799982	42887494
Epithelial.Epithelial.1.1.1.1	5-region_22	2	ZNF131	5	43065278	43192123
Epithelial.Epithelial.1.1.1.1	5-region_22	2	HMGCS1	5	43289497	43313614
Epithelial.Epithelial.1.1.1.1	5-region_22	2	CCL28	5	43376747	43412493
Epithelial.Epithelial.1.1.1.1	5-region_22	2	C5orf28	5	43444354	43483995
Epithelial.Epithelial.1.1.1.1	5-region_22	2	PAIP1	5	43526369	43557860
Epithelial.Epithelial.1.1.1.1	5-region_22	2	NNT-AS1	5	43571696	43603332
Epithelial.Epithelial.1.1.1.1	5-region_22	2	NNT	5	43602794	43707507
Epithelial.Epithelial.1.1.1.1	5-region_22	2	MRPS30	5	44809027	44820530
Epithelial.Epithelial.1.1.1.1	5-region_22	2	EMB	5	49692026	49739082
Epithelial.Epithelial.1.1.1.1	5-region_22	2	PARP8	5	49961733	50142356
Epithelial.Epithelial.1.1.1.1	5-region_22	2	ITGA1	5	52083730	52255040
Epithelial.Epithelial.1.1.1.1	5-region_22	2	PELO	5	52083774	52099880
Epithelial.Epithelial.1.1.1.1	5-region_22	2	ITGA2	5	52285156	52390609
Epithelial.Epithelial.1.1.1.1	5-region_22	2	MOCS2	5	52391509	52405893
Epithelial.Epithelial.1.1.1.1	5-region_22	2	NDUFS4	5	52856463	52979168
Epithelial.Epithelial.1.1.1.1	5-region_22	2	SNX18	5	53813589	53842415
Epithelial.Epithelial.1.1.1.1	5-region_22	2	GZMK	5	54320081	54330398
Epithelial.Epithelial.1.1.1.1	5-region_22	2	GZMA	5	54398476	54406080
Epithelial.Epithelial.1.1.1.1	5-region_22	2	GPX8	5	54455946	54462899
Epithelial.Epithelial.1.1.1.1	5-region_22	2	CCNO	5	54526980	54529508
Epithelial.Epithelial.1.1.1.1	5-region_22	2	DHX29	5	54552073	54603550
Epithelial.Epithelial.1.1.1.1	5-region_22	2	SKIV2L2	5	54603588	54721409
Epithelial.Epithelial.1.1.1.1	5-region_22	2	IL6ST	5	55230923	55290821
Epithelial.Epithelial.1.1.1.1	5-region_22	2	MAP3K1	5	56111401	56191979
Epithelial.Epithelial.1.1.1.1	5-region_22	2	SETD9	5	56205087	56221359
Epithelial.Epithelial.1.1.1.1	5-region_22	2	GPBP1	5	56469775	56560506
Epithelial.Epithelial.1.1.1.1	5-region_22	2	PLK2	5	57749809	57756087
Epithelial.Epithelial.1.1.1.1	5-region_22	2	PDE4D	5	58264865	59817947
Epithelial.Epithelial.1.1.1.1	5-region_22	2	NDUFAF2	5	60240956	60448853
Epithelial.Epithelial.1.1.1.1	5-region_22	2	SMIM15	5	60453536	60458301
Epithelial.Epithelial.1.1.1.1	5-region_22	2	ZSWIM6	5	60628100	60841997
Epithelial.Epithelial.1.1.1.1	5-region_22	2	KIF2A	5	61601989	61833076
Epithelial.Epithelial.1.1.1.1	5-region_22	2	DIMT1	5	61683081	61699766
Epithelial.Epithelial.1.1.1.1	5-region_22	2	SREK1IP1	5	64013971	64064512
Epithelial.Epithelial.1.1.1.1	5-region_24	4	C5orf15	5	133291201	133304478
Epithelial.Epithelial.1.1.1.1	5-region_24	4	VDAC1	5	133307606	133340824
Epithelial.Epithelial.1.1.1.1	5-region_24	4	TCF7	5	133450402	133487556
Epithelial.Epithelial.1.1.1.1	5-region_24	4	SKP1	5	133484633	133512729
Epithelial.Epithelial.1.1.1.1	5-region_24	4	PPP2CA	5	133530025	133561833
Epithelial.Epithelial.1.1.1.1	5-region_24	4	UBE2B	5	133706870	133727683
Epithelial.Epithelial.1.1.1.1	5-region_24	4	CDKN2AIPNL	5	133737778	133747589
Epithelial.Epithelial.1.1.1.1	5-region_24	4	JADE2	5	133860003	133918918
Epithelial.Epithelial.1.1.1.1	5-region_24	4	SAR1B	5	133936834	133984961
Epithelial.Epithelial.1.1.1.1	5-region_24	4	SEC24A	5	133984479	134063513
Epithelial.Epithelial.1.1.1.1	5-region_24	4	CAMLG	5	134074191	134087847
Epithelial.Epithelial.1.1.1.1	5-region_24	4	DDX46	5	134094469	134190823
Epithelial.Epithelial.1.1.1.1	5-region_24	4	C5orf24	5	134181370	134195427
Epithelial.Epithelial.1.1.1.1	5-region_24	4	TXNDC15	5	134209493	134237215
Epithelial.Epithelial.1.1.1.1	5-region_24	4	PCBD2	5	134240596	134343649
Epithelial.Epithelial.1.1.1.1	5-region_24	4	PITX1	5	134363425	134370503
Epithelial.Epithelial.1.1.1.1	5-region_24	4	H2AFY	5	134669590	134735604
Epithelial.Epithelial.1.1.1.1	5-region_24	4	CXCL14	5	134906373	134914969
Epithelial.Epithelial.1.1.1.1	5-region_24	4	TGFBI	5	135364584	135399507
Epithelial.Epithelial.1.1.1.1	5-region_24	4	SMAD5	5	135468534	135524435
Epithelial.Epithelial.1.1.1.1	5-region_24	4	HNRNPA0	5	137087075	137090039
Epithelial.Epithelial.1.1.1.1	5-region_24	4	FAM13B	5	137273649	137387650
Epithelial.Epithelial.1.1.1.1	5-region_24	4	BRD8	5	137475455	137514675
Epithelial.Epithelial.1.1.1.1	5-region_24	4	CDC23	5	137523339	137549032
Epithelial.Epithelial.1.1.1.1	5-region_24	4	FAM53C	5	137667624	137685416
Epithelial.Epithelial.1.1.1.1	5-region_24	4	KDM3B	5	137688285	137772717
Epithelial.Epithelial.1.1.1.1	5-region_24	4	EGR1	5	137801179	137805004
Epithelial.Epithelial.1.1.1.1	5-region_24	4	ETF1	5	137841784	137878989
Epithelial.Epithelial.1.1.1.1	5-region_24	4	HSPA9	5	137890571	137911133
Epithelial.Epithelial.1.1.1.1	5-region_24	4	CTNNA1	5	137946656	138270723
Epithelial.Epithelial.1.1.1.1	5-region_24	4	SIL1	5	138282409	138629246
Epithelial.Epithelial.1.1.1.1	5-region_24	4	MATR3	5	138609441	138667360
Epithelial.Epithelial.1.1.1.1	5-region_24	4	PAIP2	5	138677276	138705406
Epithelial.Epithelial.1.1.1.1	5-region_24	4	TMEM173	5	138855119	138862520
Epithelial.Epithelial.1.1.1.1	5-region_24	4	UBE2D2	5	138906016	139008018
Epithelial.Epithelial.1.1.1.1	5-region_24	4	CXXC5	5	139026884	139063467
Epithelial.Epithelial.1.1.1.1	5-region_24	4	PURA	5	139487362	139496321
Epithelial.Epithelial.1.1.1.1	5-region_24	4	CYSTM1	5	139554227	139661637
Epithelial.Epithelial.1.1.1.1	5-region_24	4	PFDN1	5	139624624	139682706
Epithelial.Epithelial.1.1.1.1	5-region_24	4	HBEGF	5	139712428	139726216
Epithelial.Epithelial.1.1.1.1	5-region_24	4	ANKHD1	5	139781399	139929163
Epithelial.Epithelial.1.1.1.1	5-region_24	4	SRA1	5	139916925	139937895
Epithelial.Epithelial.1.1.1.1	5-region_24	4	EIF4EBP3	5	139927251	139929163
Epithelial.Epithelial.1.1.1.1	5-region_24	4	SLC35A4	5	139944041	139948688
Epithelial.Epithelial.1.1.1.1	5-region_24	4	CD14	5	140011313	140013286
Epithelial.Epithelial.1.1.1.1	5-region_24	4	NDUFA2	5	140018325	140027370
Epithelial.Epithelial.1.1.1.1	5-region_24	4	IK	5	140026643	140042064
Epithelial.Epithelial.1.1.1.1	5-region_24	4	WDR55	5	140044261	140053709
Epithelial.Epithelial.1.1.1.1	5-region_24	4	HARS	5	140052758	140071609
Epithelial.Epithelial.1.1.1.1	5-region_24	4	HARS2	5	140071011	140078889
Epithelial.Epithelial.1.1.1.1	5-region_24	4	ZMAT2	5	140078265	140086248
Epithelial.Epithelial.1.1.1.1	5-region_24	4	TAF7	5	140698057	140700330
Epithelial.Epithelial.1.1.1.1	5-region_24	4	DIAPH1	5	140894583	140998622
Epithelial.Epithelial.1.1.1.1	5-region_24	4	HDAC3	5	141000443	141016437
Epithelial.Epithelial.1.1.1.1	5-region_24	4	PCDH1	5	141232938	141258811
Epithelial.Epithelial.1.1.1.1	6-region_27	2	HIST1H4C	6	26104104	26104518
Epithelial.Epithelial.1.1.1.1	6-region_27	2	HIST1H2BC	6	26115101	26124154
Epithelial.Epithelial.1.1.1.1	6-region_27	2	HIST1H2AC	6	26124373	26139344
Epithelial.Epithelial.1.1.1.1	6-region_27	2	HIST1H2BD	6	26158349	26171577
Epithelial.Epithelial.1.1.1.1	6-region_27	2	HIST1H4H	6	26281283	26285762
Epithelial.Epithelial.1.1.1.1	6-region_27	2	BTN3A2	6	26365387	26378546
Epithelial.Epithelial.1.1.1.1	6-region_27	2	BTN3A1	6	26402465	26415444
Epithelial.Epithelial.1.1.1.1	6-region_27	2	BTN2A1	6	26458150	26476849
Epithelial.Epithelial.1.1.1.1	6-region_27	2	HMGN4	6	26538633	26546482
Epithelial.Epithelial.1.1.1.1	6-region_27	2	ABT1	6	26597180	26600278
Epithelial.Epithelial.1.1.1.1	6-region_27	2	ZNF322	6	26636518	26659980
Epithelial.Epithelial.1.1.1.1	6-region_27	2	HIST1H2BJ	6	27093676	27100541
Epithelial.Epithelial.1.1.1.1	6-region_27	2	HIST1H2BK	6	27106073	27114619
Epithelial.Epithelial.1.1.1.1	6-region_27	2	PRSS16	6	27215480	27224403
Epithelial.Epithelial.1.1.1.1	6-region_27	2	RP1-313I6.12	6	28046570	28048908
Epithelial.Epithelial.1.1.1.1	6-region_27	2	ZNF165	6	28048753	28057341
Epithelial.Epithelial.1.1.1.1	6-region_27	2	TRIM27	6	28870779	28891766
Epithelial.Epithelial.1.1.1.1	6-region_27	2	UBD	6	29523292	29527702
Epithelial.Epithelial.1.1.1.1	6-region_27	2	HLA-F	6	29690552	29706305
Epithelial.Epithelial.1.1.1.1	6-region_27	2	HLA-A	6	29909037	29913661
Epithelial.Epithelial.1.1.1.1	6-region_27	2	ZNRD1	6	30026676	30032686
Epithelial.Epithelial.1.1.1.1	6-region_27	2	PPP1R11	6	30034486	30038110
Epithelial.Epithelial.1.1.1.1	6-region_27	2	RNF39	6	30038043	30043664
Epithelial.Epithelial.1.1.1.1	6-region_27	2	TRIM31	6	30070674	30080883
Epithelial.Epithelial.1.1.1.1	6-region_27	2	TRIM15	6	30130993	30140473
Epithelial.Epithelial.1.1.1.1	6-region_27	2	TRIM26	6	30152232	30181204
Epithelial.Epithelial.1.1.1.1	6-region_27	2	HCG18	6	30255174	30294927
Epithelial.Epithelial.1.1.1.1	6-region_27	2	RPP21	6	30312908	30314661
Epithelial.Epithelial.1.1.1.1	6-region_27	2	HLA-E	6	30457244	30461982
Epithelial.Epithelial.1.1.1.1	6-region_27	2	GNL1	6	30509154	30524951
Epithelial.Epithelial.1.1.1.1	6-region_27	2	ABCF1	6	30539153	30564956
Epithelial.Epithelial.1.1.1.1	6-region_27	2	PPP1R10	6	30568177	30586389
Epithelial.Epithelial.1.1.1.1	6-region_27	2	MRPS18B	6	30585486	30594172
Epithelial.Epithelial.1.1.1.1	6-region_27	2	C6orf136	6	30614816	30620987
Epithelial.Epithelial.1.1.1.1	6-region_27	2	DHX16	6	30620896	30640814
Epithelial.Epithelial.1.1.1.1	6-region_27	2	PPP1R18	6	30644166	30655672
Epithelial.Epithelial.1.1.1.1	6-region_27	2	TUBB	6	30687978	30693203
Epithelial.Epithelial.1.1.1.1	6-region_27	2	FLOT1	6	30695486	30710510
Epithelial.Epithelial.1.1.1.1	6-region_27	2	IER3	6	30710976	30712331
Epithelial.Epithelial.1.1.1.1	6-region_27	2	DDR1	6	30844198	30867933
Epithelial.Epithelial.1.1.1.1	6-region_27	2	SFTA2	6	30899130	30899952
Epithelial.Epithelial.1.1.1.1	6-region_27	2	DPCR1	6	30908749	30921998
Epithelial.Epithelial.1.1.1.1	6-region_27	2	PSORS1C1	6	31082527	31107869
Epithelial.Epithelial.1.1.1.1	6-region_27	2	CCHCR1	6	31110216	31126015
Epithelial.Epithelial.1.1.1.1	6-region_27	2	POU5F1	6	31132119	31148508
Epithelial.Epithelial.1.1.1.1	6-region_27	2	HLA-C	6	31236526	31239907
Epithelial.Epithelial.1.1.1.1	6-region_27	2	HLA-B	6	31321649	31324965
Epithelial.Epithelial.1.1.1.1	6-region_27	2	MICA	6	31371356	31383092
Epithelial.Epithelial.1.1.1.1	6-region_27	2	DDX39B	6	31497996	31510225
Epithelial.Epithelial.1.1.1.1	6-region_27	2	NFKBIL1	6	31514647	31526606
Epithelial.Epithelial.1.1.1.1	6-region_27	2	LTB	6	31548302	31550299
Epithelial.Epithelial.1.1.1.1	6-region_29	2	ME1	6	83920108	84140797
Epithelial.Epithelial.1.1.1.1	6-region_29	2	CYB5R4	6	84569362	84677143
Epithelial.Epithelial.1.1.1.1	6-region_29	2	NT5E	6	86159809	86205500
Epithelial.Epithelial.1.1.1.1	6-region_29	2	SNX14	6	86215214	86303874
Epithelial.Epithelial.1.1.1.1	6-region_29	2	SYNCRIP	6	86318053	86353510
Epithelial.Epithelial.1.1.1.1	6-region_29	2	SNHG5	6	86370710	86388451
Epithelial.Epithelial.1.1.1.1	6-region_29	2	ZNF292	6	87862551	87973914
Epithelial.Epithelial.1.1.1.1	6-region_29	2	SLC35A1	6	88180341	88222054
Epithelial.Epithelial.1.1.1.1	6-region_29	2	RARS2	6	88224096	88299721
Epithelial.Epithelial.1.1.1.1	6-region_29	2	AKIRIN2	6	88384790	88411927
Epithelial.Epithelial.1.1.1.1	6-region_29	2	PNRC1	6	89790470	89794879
Epithelial.Epithelial.1.1.1.1	6-region_29	2	PM20D2	6	89855769	89875284
Epithelial.Epithelial.1.1.1.1	6-region_29	2	UBE2J1	6	90036344	90062567
Epithelial.Epithelial.1.1.1.1	6-region_29	2	LYRM2	6	90277863	90348472
Epithelial.Epithelial.1.1.1.1	6-region_29	2	MAP3K7	6	91223292	91296764
Epithelial.Epithelial.1.1.1.1	6-region_29	2	UFL1	6	96969471	97003152
Epithelial.Epithelial.1.1.1.1	6-region_29	2	NDUFAF4	6	97337189	97345757
Epithelial.Epithelial.1.1.1.1	6-region_29	2	FBXL4	6	99316420	99395849
Epithelial.Epithelial.1.1.1.1	6-region_29	2	PNISR	6	99845927	99873207
Epithelial.Epithelial.1.1.1.1	6-region_29	2	CCNC	6	99990256	100016849
Epithelial.Epithelial.1.1.1.1	6-region_29	2	ASCC3	6	100956070	101329248
Epithelial.Epithelial.1.1.1.1	6-region_29	2	PREP	6	105725440	105850959
Epithelial.Epithelial.1.1.1.1	6-region_29	2	PRDM1	6	106534195	106557814
Epithelial.Epithelial.1.1.1.1	6-region_29	2	ATG5	6	106632351	106773666
Epithelial.Epithelial.1.1.1.1	6-region_29	2	AIM1	6	106959730	107018326
Epithelial.Epithelial.1.1.1.1	6-region_29	2	C6orf203	6	107349407	107372546
Epithelial.Epithelial.1.1.1.1	6-region_29	2	SEC63	6	108188960	108279393
Epithelial.Epithelial.1.1.1.1	6-region_29	2	OSTM1	6	108362613	108487058
Epithelial.Epithelial.1.1.1.1	6-region_29	2	SNX3	6	108532426	108582464
Epithelial.Epithelial.1.1.1.1	6-region_29	2	FOXO3	6	108881038	109005977
Epithelial.Epithelial.1.1.1.1	6-region_29	2	CD164	6	109687717	109703762
Epithelial.Epithelial.1.1.1.1	6-region_29	2	SMPD2	6	109761966	109765122
Epithelial.Epithelial.1.1.1.1	6-region_29	2	CDC40	6	110501344	110575478
Epithelial.Epithelial.1.1.1.1	6-region_29	2	CDK19	6	110931181	111137161
Epithelial.Epithelial.1.1.1.1	6-region_29	2	AMD1	6	111195973	111216916
Epithelial.Epithelial.1.1.1.1	6-region_29	2	GTF3C6	6	111279763	111289093
Epithelial.Epithelial.1.1.1.1	6-region_29	2	RPF2	6	111303218	111349466
Epithelial.Epithelial.1.1.1.1	7-region_32	4	CCZ1	7	5938356	5965605
Epithelial.Epithelial.1.1.1.1	7-region_32	4	PMS2	7	6012870	6048756
Epithelial.Epithelial.1.1.1.1	7-region_32	4	AIMP2	7	6048876	6063465
Epithelial.Epithelial.1.1.1.1	7-region_32	4	EIF2AK1	7	6061881	6098861
Epithelial.Epithelial.1.1.1.1	7-region_32	4	USP42	7	6144515	6201195
Epithelial.Epithelial.1.1.1.1	7-region_32	4	RAC1	7	6414154	6443608
Epithelial.Epithelial.1.1.1.1	7-region_32	4	KDELR2	7	6485584	6523873
Epithelial.Epithelial.1.1.1.1	7-region_32	4	ZDHHC4	7	6617065	6629005
Epithelial.Epithelial.1.1.1.1	7-region_32	4	C7orf26	7	6629648	6648357
Epithelial.Epithelial.1.1.1.1	7-region_32	4	ZNF12	7	6728064	6746554
Epithelial.Epithelial.1.1.1.1	7-region_32	4	C1GALT1	7	7196565	7288282
Epithelial.Epithelial.1.1.1.1	7-region_32	4	RP5-1159O4.1	7	7592093	7606627
Epithelial.Epithelial.1.1.1.1	7-region_32	4	RPA3	7	7676149	7758238
Epithelial.Epithelial.1.1.1.1	7-region_32	4	ICA1	7	8152814	8302317
Epithelial.Epithelial.1.1.1.1	7-region_32	4	NDUFA4	7	10971578	10979883
Epithelial.Epithelial.1.1.1.1	7-region_32	4	PHF14	7	11013499	11209250
Epithelial.Epithelial.1.1.1.1	7-region_32	4	TMEM106B	7	12250867	12282993
Epithelial.Epithelial.1.1.1.1	7-region_32	4	SCIN	7	12610203	12693228
Epithelial.Epithelial.1.1.1.1	7-region_32	4	ARL4A	7	12726481	12730559
Epithelial.Epithelial.1.1.1.1	7-region_32	4	ETV1	7	13930853	14031050
Epithelial.Epithelial.1.1.1.1	7-region_32	4	ANKMY2	7	16639401	16685442
Epithelial.Epithelial.1.1.1.1	7-region_32	4	BZW2	7	16685756	16746148
Epithelial.Epithelial.1.1.1.1	7-region_32	4	TSPAN13	7	16793160	16824161
Epithelial.Epithelial.1.1.1.1	7-region_32	4	AGR2	7	16831435	16873057
Epithelial.Epithelial.1.1.1.1	7-region_32	4	AGR3	7	16899029	16921611
Epithelial.Epithelial.1.1.1.1	7-region_32	4	AHR	7	17338246	17385776
Epithelial.Epithelial.1.1.1.1	7-region_32	4	SNX13	7	17830385	17980124
Epithelial.Epithelial.1.1.1.1	7-region_32	4	HDAC9	7	18126572	19042039
Epithelial.Epithelial.1.1.1.1	7-region_32	4	TWISTNB	7	19735085	19748710
Epithelial.Epithelial.1.1.1.1	7-region_32	4	MACC1	7	20174278	20257027
Epithelial.Epithelial.1.1.1.1	7-region_32	4	CTA-293F17.1	7	20367922	20371370
Epithelial.Epithelial.1.1.1.1	7-region_32	4	ITGB8	7	20370325	20455377
Epithelial.Epithelial.1.1.1.1	7-region_32	4	CDCA7L	7	21940518	21985702
Epithelial.Epithelial.1.1.1.1	7-region_32	4	RAPGEF5	7	22157856	22396763
Epithelial.Epithelial.1.1.1.1	7-region_32	4	TOMM7	7	22852251	22862470
Epithelial.Epithelial.1.1.1.1	7-region_34	4	VKORC1L1	7	65338254	65424550
Epithelial.Epithelial.1.1.1.1	7-region_34	4	GUSB	7	65425671	65447301
Epithelial.Epithelial.1.1.1.1	7-region_34	4	ASL	7	65540785	65558545
Epithelial.Epithelial.1.1.1.1	7-region_34	4	CRCP	7	65579591	65619555
Epithelial.Epithelial.1.1.1.1	7-region_34	4	RP11-792A8.4	7	66204816	66205372
Epithelial.Epithelial.1.1.1.1	7-region_34	4	TMEM248	7	66386212	66423538
Epithelial.Epithelial.1.1.1.1	7-region_34	4	SBDS	7	66452664	66460588
Epithelial.Epithelial.1.1.1.1	7-region_34	4	TYW1	7	66460160	66704501
Epithelial.Epithelial.1.1.1.1	7-region_34	4	POM121	7	72349936	72421979
Epithelial.Epithelial.1.1.1.1	7-region_34	4	NSUN5	7	72716514	72722864
Epithelial.Epithelial.1.1.1.1	7-region_34	4	BAZ1B	7	72854728	72936608
Epithelial.Epithelial.1.1.1.1	7-region_34	4	BCL7B	7	72950686	72972332
Epithelial.Epithelial.1.1.1.1	7-region_34	4	TBL2	7	72983262	72993121
Epithelial.Epithelial.1.1.1.1	7-region_34	4	DNAJC30	7	73095299	73097783
Epithelial.Epithelial.1.1.1.1	7-region_34	4	WBSCR22	7	73097355	73119491
Epithelial.Epithelial.1.1.1.1	7-region_34	4	STX1A	7	73113536	73134002
Epithelial.Epithelial.1.1.1.1	7-region_34	4	LINC00035	7	73149368	73150384
Epithelial.Epithelial.1.1.1.1	7-region_34	4	ABHD11	7	73150424	73153197
Epithelial.Epithelial.1.1.1.1	7-region_34	4	CLDN3	7	73183328	73184600
Epithelial.Epithelial.1.1.1.1	7-region_34	4	CLDN4	7	73213872	73247014
Epithelial.Epithelial.1.1.1.1	7-region_34	4	WBSCR27	7	73248920	73256865
Epithelial.Epithelial.1.1.1.1	7-region_34	4	EIF4H	7	73588575	73611431
Epithelial.Epithelial.1.1.1.1	7-region_34	4	RFC2	7	73645829	73668774
Epithelial.Epithelial.1.1.1.1	7-region_34	4	CLIP2	7	73703805	73820273
Epithelial.Epithelial.1.1.1.1	7-region_34	4	GTF2IRD1	7	73868120	74016931
Epithelial.Epithelial.1.1.1.1	7-region_34	4	GTF2I	7	74071994	74175026
Epithelial.Epithelial.1.1.1.1	7-region_34	4	GTF2IRD2	7	74210483	74267847
Epithelial.Epithelial.1.1.1.1	7-region_34	4	WBSCR16	7	74441226	74490064
Epithelial.Epithelial.1.1.1.1	7-region_34	4	GTF2IRD2B	7	74508364	74565623
Epithelial.Epithelial.1.1.1.1	7-region_34	4	POM121C	7	75046066	75115548
Epithelial.Epithelial.1.1.1.1	7-region_34	4	RHBDD2	7	75471920	75518244
Epithelial.Epithelial.1.1.1.1	7-region_34	4	POR	7	75528518	75616173
Epithelial.Epithelial.1.1.1.1	7-region_34	4	TMEM120A	7	75616155	75623977
Epithelial.Epithelial.1.1.1.1	7-region_34	4	STYXL1	7	75625656	75677322
Epithelial.Epithelial.1.1.1.1	7-region_34	4	MDH2	7	75677369	75696826
Epithelial.Epithelial.1.1.1.1	7-region_34	4	HSPB1	7	75931861	75933612
Epithelial.Epithelial.1.1.1.1	7-region_34	4	YWHAG	7	75956116	75988348
Epithelial.Epithelial.1.1.1.1	7-region_34	4	DTX2	7	76090993	76135312
Epithelial.Epithelial.1.1.1.1	7-region_34	4	GSAP	7	76940068	77045717
Epithelial.Epithelial.1.1.1.1	7-region_34	4	PTPN12	7	77166592	77269388
Epithelial.Epithelial.1.1.1.1	7-region_34	4	RSBN1L-AS1	7	77286977	77325582
Epithelial.Epithelial.1.1.1.1	7-region_34	4	RSBN1L	7	77325760	77412339
Epithelial.Epithelial.1.1.1.1	7-region_34	4	TMEM60	7	77423045	77427897
Epithelial.Epithelial.1.1.1.1	7-region_34	4	SEMA3C	7	80371854	80551675
Epithelial.Epithelial.1.1.1.1	7-region_34	4	DMTF1	7	86781677	86825653
Epithelial.Epithelial.1.1.1.1	7-region_34	4	TMEM243	7	86825478	86849903
Epithelial.Epithelial.1.1.1.1	7-region_34	4	TP53TG1	7	86954541	86974831
Epithelial.Epithelial.1.1.1.1	7-region_34	4	CROT	7	86974997	87029111
Epithelial.Epithelial.1.1.1.1	7-region_34	4	SLC25A40	7	87462883	87505672
Epithelial.Epithelial.1.1.1.1	7-region_34	4	DBF4	7	87505531	87538856
Epithelial.Epithelial.1.1.1.1	7-region_34	4	SRI	7	87834433	87856308
Epithelial.Epithelial.1.1.1.1	7-region_34	4	STEAP4	7	87905744	87936206
Epithelial.Epithelial.1.1.1.1	7-region_34	4	STEAP1	7	89783689	89794143
Epithelial.Epithelial.1.1.1.1	7-region_34	4	STEAP2	7	89796904	89867451
Epithelial.Epithelial.1.1.1.1	7-region_34	4	GTPBP10	7	89964537	90020769
Epithelial.Epithelial.1.1.1.1	7-region_34	4	CLDN12	7	90013035	90142716
Epithelial.Epithelial.1.1.1.1	7-region_34	4	AKAP9	7	91570181	91739987
Epithelial.Epithelial.1.1.1.1	7-region_34	4	CYP51A1	7	91741465	91772266
Epithelial.Epithelial.1.1.1.1	7-region_34	4	KRIT1	7	91828283	91875480
Epithelial.Epithelial.1.1.1.1	7-region_34	4	ANKIB1	7	91875548	92030698
Epithelial.Epithelial.1.1.1.1	7-region_34	4	GATAD1	7	92076767	92088150
Epithelial.Epithelial.1.1.1.1	7-region_34	4	FAM133B	7	92190107	92219708
Epithelial.Epithelial.1.1.1.1	7-region_34	4	CDK6	7	92234235	92465908
Epithelial.Epithelial.1.1.1.1	7-region_34	4	SAMD9	7	92728829	92747336
Epithelial.Epithelial.1.1.1.1	7-region_34	4	SAMD9L	7	92759368	92777682
Epithelial.Epithelial.1.1.1.1	7-region_34	4	BET1	7	93592074	93633694
Epithelial.Epithelial.1.1.1.1	7-region_34	4	COL1A2	7	94023873	94060544
Epithelial.Epithelial.1.1.1.1	7-region_34	4	PPP1R9A	7	94536514	94925727
Epithelial.Epithelial.1.1.1.1	7-region_34	4	PON2	7	95034175	95064510
Epithelial.Epithelial.1.1.1.1	7-region_34	4	PDK4	7	95212811	95225803
Epithelial.Epithelial.1.1.1.1	7-region_34	4	SLC25A13	7	95749532	95951459
Epithelial.Epithelial.1.1.1.1	7-region_34	4	SHFM1	7	96110938	96339203
Epithelial.Epithelial.1.1.1.1	7-region_34	4	ACN9	7	96745902	96811075
Epithelial.Epithelial.1.1.1.1	7-region_34	4	ASNS	7	97481430	97501854
Epithelial.Epithelial.1.1.1.1	7-region_34	4	LMTK2	7	97736197	97838945
Epithelial.Epithelial.1.1.1.1	7-region_34	4	TECPR1	7	97843936	97881563
Epithelial.Epithelial.1.1.1.1	7-region_34	4	BRI3	7	97881691	97937162
Epithelial.Epithelial.1.1.1.1	7-region_34	4	BAIAP2L1	7	97920963	98030380
Epithelial.Epithelial.1.1.1.1	7-region_34	4	TRRAP	7	98475556	98610866
Epithelial.Epithelial.1.1.1.1	7-region_34	4	SMURF1	7	98625061	98741723
Epithelial.Epithelial.1.1.1.1	7-region_34	4	ARPC1A	7	98923521	98985787
Epithelial.Epithelial.1.1.1.1	7-region_34	4	ARPC1B	7	98971872	98992424
Epithelial.Epithelial.1.1.1.1	7-region_34	4	PDAP1	7	98989671	99006452
Epithelial.Epithelial.1.1.1.1	7-region_34	4	BUD31	7	99006264	99017239
Epithelial.Epithelial.1.1.1.1	7-region_34	4	CPSF4	7	99036545	99054994
Epithelial.Epithelial.1.1.1.1	7-region_34	4	ATP5J2	7	99046098	99063954
Epithelial.Epithelial.1.1.1.1	7-region_34	4	ZNF394	7	99084142	99097947
Epithelial.Epithelial.1.1.1.1	7-region_34	4	ZNF655	7	99156029	99174076
Epithelial.Epithelial.1.1.1.1	7-region_34	4	CYP3A5	7	99245817	99277621
Epithelial.Epithelial.1.1.1.1	7-region_34	4	TRIM4	7	99474581	99517223
Epithelial.Epithelial.1.1.1.1	7-region_34	4	AZGP1	7	99564343	99573780
Epithelial.Epithelial.1.1.1.1	7-region_34	4	ZKSCAN1	7	99613204	99639312
Epithelial.Epithelial.1.1.1.1	7-region_34	4	ZNF3	7	99661656	99680171
Epithelial.Epithelial.1.1.1.1	7-region_34	4	COPS6	7	99686577	99689823
Epithelial.Epithelial.1.1.1.1	7-region_34	4	MCM7	7	99690351	99699563
Epithelial.Epithelial.1.1.1.1	7-region_34	4	AP4M1	7	99699172	99707968
Epithelial.Epithelial.1.1.1.1	7-region_34	4	TAF6	7	99704693	99717464
Epithelial.Epithelial.1.1.1.1	7-region_34	4	LAMTOR4	7	99746530	99753567
Epithelial.Epithelial.1.1.1.1	7-region_34	4	PILRB	7	99933737	99965356
Epithelial.Epithelial.1.1.1.1	7-region_34	4	MEPCE	7	100026413	100031741
Epithelial.Epithelial.1.1.1.1	7-region_34	4	PPP1R35	7	100032905	100034188
Epithelial.Epithelial.1.1.1.1	7-region_34	4	TSC22D4	7	100060982	100076902
Epithelial.Epithelial.1.1.1.1	7-region_34	4	AGFG2	7	100136834	100165842
Epithelial.Epithelial.1.1.1.1	7-region_34	4	LRCH4	7	100169855	100183776
Epithelial.Epithelial.1.1.1.1	7-region_34	4	MOSPD3	7	100209725	100213007
Epithelial.Epithelial.1.1.1.1	7-region_34	4	GNB2	7	100271154	100276797
Epithelial.Epithelial.1.1.1.1	7-region_34	4	GIGYF1	7	100277130	100287071
Epithelial.Epithelial.1.1.1.1	7-region_34	4	POP7	7	100303676	100305118
Epithelial.Epithelial.1.1.1.1	7-region_34	4	EPHB4	7	100400187	100425121
Epithelial.Epithelial.1.1.1.1	7-region_36	2	HIPK2	7	139246316	139477577
Epithelial.Epithelial.1.1.1.1	7-region_36	2	TBXAS1	7	139476850	139720125
Epithelial.Epithelial.1.1.1.1	7-region_36	2	PARP12	7	139723544	139763521
Epithelial.Epithelial.1.1.1.1	7-region_36	2	KDM7A	7	139784546	139876835
Epithelial.Epithelial.1.1.1.1	7-region_36	2	SLC37A3	7	139993493	140104233
Epithelial.Epithelial.1.1.1.1	7-region_36	2	MKRN1	7	140152840	140179369
Epithelial.Epithelial.1.1.1.1	7-region_36	2	NDUFB2	7	140390577	140422590
Epithelial.Epithelial.1.1.1.1	7-region_36	2	BRAF	7	140419127	140624564
Epithelial.Epithelial.1.1.1.1	7-region_36	2	MRPS33	7	140705854	140715028
Epithelial.Epithelial.1.1.1.1	7-region_36	2	KIAA1147	7	141356528	141401953
Epithelial.Epithelial.1.1.1.1	7-region_36	2	SSBP1	7	141438121	141487722
Epithelial.Epithelial.1.1.1.1	7-region_36	2	TRBV20-1	7	142334163	142334913
Epithelial.Epithelial.1.1.1.1	7-region_36	2	PRSS1	7	142457319	142460923
Epithelial.Epithelial.1.1.1.1	7-region_36	2	TRBC2	7	142498725	142500432
Epithelial.Epithelial.1.1.1.1	7-region_36	2	EPHB6	7	142552792	142568847
Epithelial.Epithelial.1.1.1.1	7-region_36	2	GSTK1	7	142941186	142967947
Epithelial.Epithelial.1.1.1.1	7-region_36	2	TMEM139	7	142977050	142985141
Epithelial.Epithelial.1.1.1.1	7-region_36	2	AC093673.5	7	143076785	143077588
Epithelial.Epithelial.1.1.1.1	7-region_36	2	ZYX	7	143078173	143088204
Epithelial.Epithelial.1.1.1.1	7-region_36	2	FAM115A	7	143548468	143599291
Epithelial.Epithelial.1.1.1.1	7-region_36	2	ARHGEF35	7	143883176	143991230
Epithelial.Epithelial.1.1.1.1	7-region_36	2	ARHGEF5	7	144052381	144077725
Epithelial.Epithelial.1.1.1.1	7-region_36	2	CUL1	7	148395006	148498128
Epithelial.Epithelial.1.1.1.1	7-region_36	2	EZH2	7	148504475	148581413
Epithelial.Epithelial.1.1.1.1	7-region_36	2	PDIA4	7	148700154	148725733
Epithelial.Epithelial.1.1.1.1	7-region_36	2	ATP6V0E2	7	149570057	149577784
Epithelial.Epithelial.1.1.1.1	7-region_36	2	RARRES2	7	150035408	150038763
Epithelial.Epithelial.1.1.1.1	7-region_36	2	REPIN1	7	150065278	150071133
Epithelial.Epithelial.1.1.1.1	7-region_36	2	GIMAP7	7	150211918	150218161
Epithelial.Epithelial.1.1.1.1	7-region_36	2	GIMAP4	7	150264365	150271041
Epithelial.Epithelial.1.1.1.1	7-region_36	2	GIMAP2	7	150382785	150390729
Epithelial.Epithelial.1.1.1.1	7-region_36	2	TMEM176B	7	150488373	150498448
Epithelial.Epithelial.1.1.1.1	7-region_36	2	TMEM176A	7	150497491	150502208
Epithelial.Epithelial.1.1.1.1	7-region_36	2	AOC1	7	150521715	150558592
Epithelial.Epithelial.1.1.1.1	7-region_36	2	ABCB8	7	150725510	150744869
Epithelial.Epithelial.1.1.1.1	7-region_36	2	CDK5	7	150750899	150755617
Epithelial.Epithelial.1.1.1.1	7-region_36	2	SLC4A2	7	150754297	150773614
Epithelial.Epithelial.1.1.1.1	7-region_36	2	FASTK	7	150773711	150777953
Epithelial.Epithelial.1.1.1.1	7-region_36	2	TMUB1	7	150778167	150780633
Epithelial.Epithelial.1.1.1.1	7-region_36	2	AGAP3	7	150782918	150841523
Epithelial.Epithelial.1.1.1.1	7-region_36	2	ABCF2	7	150904923	150924316
Epithelial.Epithelial.1.1.1.1	7-region_36	2	CHPF2	7	150929575	150935908
Epithelial.Epithelial.1.1.1.1	7-region_36	2	NUB1	7	151038785	151075535
Epithelial.Epithelial.1.1.1.1	7-region_36	2	RHEB	7	151163098	151217206
Epithelial.Epithelial.1.1.1.1	7-region_36	2	PRKAG2	7	151253197	151574210
Epithelial.Epithelial.1.1.1.1	7-region_36	2	GALNT11	7	151722759	151819425
Epithelial.Epithelial.1.1.1.1	7-region_36	2	KMT2C	7	151832010	152133090
Epithelial.Epithelial.1.1.1.1	7-region_36	2	PAXIP1-AS1	7	154795158	154797413
Epithelial.Epithelial.1.1.1.1	7-region_36	2	INSIG1	7	155089486	155101945
Epithelial.Epithelial.1.1.1.1	7-region_36	2	RBM33	7	155437145	155574179
Epithelial.Epithelial.1.1.1.1	7-region_36	2	SHH	7	155592680	155604967
Epithelial.Epithelial.1.1.1.1	7-region_36	2	LMBR1	7	156461646	156685924
Epithelial.Epithelial.1.1.1.1	7-region_36	2	NOM1	7	156742417	156765876
Epithelial.Epithelial.1.1.1.1	7-region_36	2	UBE3C	7	156931607	157062066
Epithelial.Epithelial.1.1.1.1	7-region_36	2	DNAJB6	7	157128075	157210133
Epithelial.Epithelial.1.1.1.1	7-region_36	2	PTPRN2	7	157331750	158380480
Epithelial.Epithelial.1.1.1.1	7-region_36	2	ESYT2	7	158523686	158622944
Epithelial.Epithelial.1.1.1.1	7-region_36	2	WDR60	7	158649269	158749438
Epithelial.Epithelial.1.1.1.1	8-region_38	4	RBPMS	8	30241944	30429778
Epithelial.Epithelial.1.1.1.1	8-region_38	4	GTF2E2	8	30435835	30515768
Epithelial.Epithelial.1.1.1.1	8-region_38	4	GSR	8	30535583	30585443
Epithelial.Epithelial.1.1.1.1	8-region_38	4	PPP2CB	8	30631973	30671830
Epithelial.Epithelial.1.1.1.1	8-region_38	4	ZNF703	8	37553269	37557537
Epithelial.Epithelial.1.1.1.1	8-region_38	4	ERLIN2	8	37594117	37616619
Epithelial.Epithelial.1.1.1.1	8-region_38	4	PROSC	8	37620111	37637283
Epithelial.Epithelial.1.1.1.1	8-region_38	4	RAB11FIP1	8	37716136	37756985
Epithelial.Epithelial.1.1.1.1	8-region_38	4	EIF4EBP1	8	37887859	37917883
Epithelial.Epithelial.1.1.1.1	8-region_38	4	ASH2L	8	37962760	38001594
Epithelial.Epithelial.1.1.1.1	8-region_38	4	LSM1	8	38020839	38034248
Epithelial.Epithelial.1.1.1.1	8-region_38	4	BAG4	8	38034051	38070819
Epithelial.Epithelial.1.1.1.1	8-region_38	4	DDHD2	8	38082736	38133076
Epithelial.Epithelial.1.1.1.1	8-region_38	4	PPAPDC1B	8	38120648	38126761
Epithelial.Epithelial.1.1.1.1	8-region_38	4	WHSC1L1	8	38127215	38239790
Epithelial.Epithelial.1.1.1.1	8-region_38	4	LETM2	8	38243725	38267045
Epithelial.Epithelial.1.1.1.1	8-region_38	4	TACC1	8	38585704	38710546
Epithelial.Epithelial.1.1.1.1	8-region_38	4	PLEKHA2	8	38758753	38831428
Epithelial.Epithelial.1.1.1.1	8-region_38	4	TM2D2	8	38846327	38854343
Epithelial.Epithelial.1.1.1.1	8-region_38	4	ADAM9	8	38854388	38962663
Epithelial.Epithelial.1.1.1.1	8-region_38	4	C8orf4	8	40010989	40012821
Epithelial.Epithelial.1.1.1.1	8-region_38	4	GOLGA7	8	41347915	41368499
Epithelial.Epithelial.1.1.1.1	8-region_38	4	KAT6A	8	41786997	41909508
Epithelial.Epithelial.1.1.1.1	8-region_38	4	AP3M2	8	42010464	42029191
Epithelial.Epithelial.1.1.1.1	8-region_38	4	PLAT	8	42032236	42065242
Epithelial.Epithelial.1.1.1.1	8-region_38	4	IKBKB	8	42128820	42189973
Epithelial.Epithelial.1.1.1.1	8-region_38	4	POLB	8	42195972	42229326
Epithelial.Epithelial.1.1.1.1	8-region_38	4	DKK4	8	42231586	42234750
Epithelial.Epithelial.1.1.1.1	8-region_38	4	VDAC3	8	42249142	42263415
Epithelial.Epithelial.1.1.1.1	8-region_38	4	SLC20A2	8	42273993	42397069
Epithelial.Epithelial.1.1.1.1	8-region_38	4	SMIM19	8	42396298	42409603
Epithelial.Epithelial.1.1.1.1	8-region_38	4	RNF170	8	42704780	42752433
Epithelial.Epithelial.1.1.1.1	8-region_38	4	HOOK3	8	42752075	42885682
Epithelial.Epithelial.1.1.1.1	8-region_38	4	FNTA	8	42889337	42940931
Epithelial.Epithelial.1.1.1.1	8-region_38	4	HGSNAT	8	42995556	43057998
Epithelial.Epithelial.1.1.1.1	8-region_38	4	SPIDR	8	48173167	48648868
Epithelial.Epithelial.1.1.1.1	8-region_38	4	CEBPD	8	48649471	48651648
Epithelial.Epithelial.1.1.1.1	8-region_38	4	PRKDC	8	48685669	48872743
Epithelial.Epithelial.1.1.1.1	8-region_38	4	UBE2V2	8	48920960	48977268
Epithelial.Epithelial.1.1.1.1	8-region_38	4	PCMTD1	8	52730140	52811735
Epithelial.Epithelial.1.1.1.1	8-region_38	4	RB1CC1	8	53535016	53658403
Epithelial.Epithelial.1.1.1.1	8-region_38	4	ATP6V1H	8	54628117	54756118
Epithelial.Epithelial.1.1.1.1	8-region_38	4	TCEA1	8	54879112	54935089
Epithelial.Epithelial.1.1.1.1	8-region_38	4	LYPLA1	8	54958938	55014577
Epithelial.Epithelial.1.1.1.1	8-region_38	4	MRPL15	8	55047770	55060461
Epithelial.Epithelial.1.1.1.1	8-region_38	4	TMEM68	8	56608983	56685966
Epithelial.Epithelial.1.1.1.1	8-region_38	4	TGS1	8	56685701	56738007
Epithelial.Epithelial.1.1.1.1	8-region_38	4	LYN	8	56792372	56923940
Epithelial.Epithelial.1.1.1.1	8-region_38	4	RPS20	8	56979854	56987069
Epithelial.Epithelial.1.1.1.1	8-region_38	4	CHCHD7	8	57124245	57131357
Epithelial.Epithelial.1.1.1.1	8-region_38	4	SDR16C5	8	57212569	57233335
Epithelial.Epithelial.1.1.1.1	8-region_38	4	IMPAD1	8	57870492	57906403
Epithelial.Epithelial.1.1.1.1	8-region_38	4	UBXN2B	8	59323823	59364060
Epithelial.Epithelial.1.1.1.1	8-region_38	4	SDCBP	8	59465483	59495419
Epithelial.Epithelial.1.1.1.1	8-region_38	4	NSMAF	8	59496063	59572403
Epithelial.Epithelial.1.1.1.1	8-region_38	4	RAB2A	8	61429416	61536186
Epithelial.Epithelial.1.1.1.1	8-region_38	4	CHD7	8	61591337	61779465
Epithelial.Epithelial.1.1.1.1	8-region_38	4	ASPH	8	62413116	62627155
Epithelial.Epithelial.1.1.1.1	8-region_38	4	GGH	8	63927638	63951730
Epithelial.Epithelial.1.1.1.1	8-region_38	4	YTHDF3	8	64081112	64125346
Epithelial.Epithelial.1.1.1.1	8-region_38	4	ARMC1	8	66514694	66546442
Epithelial.Epithelial.1.1.1.1	8-region_38	4	MTFR1	8	66556969	66683496
Epithelial.Epithelial.1.1.1.1	8-region_38	4	PDE7A	8	66629745	66754557
Epithelial.Epithelial.1.1.1.1	8-region_38	4	RRS1	8	67341263	67342966
Epithelial.Epithelial.1.1.1.1	8-region_38	4	VCPIP1	8	67540722	67579452
Epithelial.Epithelial.1.1.1.1	8-region_38	4	COPS5	8	67955314	67996018
Epithelial.Epithelial.1.1.1.1	8-region_38	4	CSPP1	8	67974661	68108498
Epithelial.Epithelial.1.1.1.1	8-region_38	4	ARFGEF1	8	68085747	68255912
Epithelial.Epithelial.1.1.1.1	8-region_38	4	NCOA2	8	71021997	71316040
Epithelial.Epithelial.1.1.1.1	8-region_38	4	TRAM1	8	71485677	71520622
Epithelial.Epithelial.1.1.1.1	8-region_38	4	LACTB2	8	71547553	71581409
Epithelial.Epithelial.1.1.1.1	9-region_41	4	GALNT12	9	101569981	101612363
Epithelial.Epithelial.1.1.1.1	9-region_41	4	TGFBR1	9	101866320	101916474
Epithelial.Epithelial.1.1.1.1	9-region_41	4	ALG2	9	101978708	101984238
Epithelial.Epithelial.1.1.1.1	9-region_41	4	SEC61B	9	101984346	101992897
Epithelial.Epithelial.1.1.1.1	9-region_41	4	STX17	9	102668915	102732618
Epithelial.Epithelial.1.1.1.1	9-region_41	4	ERP44	9	102741461	102861322
Epithelial.Epithelial.1.1.1.1	9-region_41	4	MRPL50	9	104149915	104160896
Epithelial.Epithelial.1.1.1.1	9-region_41	4	ALDOB	9	104182860	104198105
Epithelial.Epithelial.1.1.1.1	9-region_41	4	TMEM246	9	104235453	104295819
Epithelial.Epithelial.1.1.1.1	9-region_41	4	RNF20	9	104296133	104325622
Epithelial.Epithelial.1.1.1.1	9-region_41	4	SMC2	9	106856541	106903698
Epithelial.Epithelial.1.1.1.1	9-region_41	4	NIPSNAP3A	9	107509969	107522403
Epithelial.Epithelial.1.1.1.1	9-region_41	4	ABCA1	9	107543283	107690518
Epithelial.Epithelial.1.1.1.1	9-region_41	4	SLC44A1	9	108006903	108201452
Epithelial.Epithelial.1.1.1.1	9-region_41	4	ZNF462	9	109625378	109775915
Epithelial.Epithelial.1.1.1.1	9-region_41	4	RAD23B	9	110045418	110094475
Epithelial.Epithelial.1.1.1.1	9-region_41	4	KLF4	9	110247133	110252763
Epithelial.Epithelial.1.1.1.1	9-region_41	4	CTNNAL1	9	111704851	111775809
Epithelial.Epithelial.1.1.1.1	9-region_41	4	TMEM245	9	111777432	111882225
Epithelial.Epithelial.1.1.1.1	9-region_41	4	EPB41L4B	9	111934255	112083244
Epithelial.Epithelial.1.1.1.1	9-region_41	4	PTPN3	9	112137746	112260590
Epithelial.Epithelial.1.1.1.1	9-region_41	4	C9orf152	9	112952328	112970469
Epithelial.Epithelial.1.1.1.1	9-region_41	4	TXN	9	113006091	113018920
Epithelial.Epithelial.1.1.1.1	9-region_41	4	KIAA0368	9	114122972	114247025
Epithelial.Epithelial.1.1.1.1	9-region_41	4	PTGR1	9	114312002	114362135
Epithelial.Epithelial.1.1.1.1	9-region_41	4	DNAJC25-GNG10	9	114393666	114432509
Epithelial.Epithelial.1.1.1.1	9-region_41	4	GNG10	9	114423615	114432526
Epithelial.Epithelial.1.1.1.1	9-region_41	4	UGCG	9	114659046	114697649
Epithelial.Epithelial.1.1.1.1	9-region_41	4	PTBP3	9	114980715	115095947
Epithelial.Epithelial.1.1.1.1	9-region_41	4	HSDL2	9	115142217	115234690
Epithelial.Epithelial.1.1.1.1	9-region_41	4	INIP	9	115446206	115480516
Epithelial.Epithelial.1.1.1.1	9-region_41	4	FKBP15	9	115923286	115983641
Epithelial.Epithelial.1.1.1.1	9-region_41	4	SLC31A1	9	115983808	116028674
Epithelial.Epithelial.1.1.1.1	9-region_41	4	CDC26	9	116018115	116037869
Epithelial.Epithelial.1.1.1.1	9-region_41	4	PRPF4	9	116037623	116055185
Epithelial.Epithelial.1.1.1.1	9-region_41	4	BSPRY	9	116111821	116133513
Epithelial.Epithelial.1.1.1.1	9-region_41	4	HDHD3	9	116135699	116139279
Epithelial.Epithelial.1.1.1.1	9-region_41	4	ALAD	9	116148597	116163613
Epithelial.Epithelial.1.1.1.1	9-region_41	4	POLE3	9	116169515	116172952
Epithelial.Epithelial.1.1.1.1	9-region_41	4	RGS3	9	116207011	116360018
Epithelial.Epithelial.1.1.1.1	9-region_41	4	AMBP	9	116822407	116840752
Epithelial.Epithelial.1.1.1.1	9-region_41	4	KIF12	9	116848406	116861507
Epithelial.Epithelial.1.1.1.1	9-region_41	4	COL27A1	9	116917840	117074791
Epithelial.Epithelial.1.1.1.1	9-region_41	4	ATP6V1G1	9	117350026	117360653
Epithelial.Epithelial.1.1.1.1	9-region_41	4	CDK5RAP2	9	123151147	123342448
Epithelial.Epithelial.1.1.1.1	9-region_41	4	FBXW2	9	123514256	123555690
Epithelial.Epithelial.1.1.1.1	9-region_41	4	PSMD5	9	123577774	123605262
Epithelial.Epithelial.1.1.1.1	9-region_41	4	PSMD5-AS1	9	123587106	123616651
Epithelial.Epithelial.1.1.1.1	9-region_41	4	PHF19	9	123617977	123639606
Epithelial.Epithelial.1.1.1.1	9-region_41	4	CNTRL	9	123837141	123939888
Epithelial.Epithelial.1.1.1.1	9-region_41	4	RAB14	9	123940415	123985292
Epithelial.Epithelial.1.1.1.1	9-region_41	4	GSN	9	123970072	124095121
Epithelial.Epithelial.1.1.1.1	9-region_41	4	STOM	9	124101355	124132531
Epithelial.Epithelial.1.1.1.1	9-region_41	4	DAB2IP	9	124329336	124547809
Epithelial.Epithelial.1.1.1.1	9-region_41	4	NDUFA8	9	124894745	124922098
Epithelial.Epithelial.1.1.1.1	9-region_41	4	RBM18	9	124999903	125027118
Epithelial.Epithelial.1.1.1.1	9-region_41	4	MRRF	9	125026882	125085743
Epithelial.Epithelial.1.1.1.1	9-region_41	4	PDCL	9	125560668	125590910
Epithelial.Epithelial.1.1.1.1	9-region_41	4	RC3H2	9	125606835	125667620
Epithelial.Epithelial.1.1.1.1	9-region_41	4	RABGAP1	9	125703112	125867145
Epithelial.Epithelial.1.1.1.1	9-region_41	4	STRBP	9	125871779	126030855
Epithelial.Epithelial.1.1.1.1	9-region_41	4	NEK6	9	127019885	127115586
Epithelial.Epithelial.1.1.1.1	9-region_41	4	PSMB7	9	127115745	127177723
Epithelial.Epithelial.1.1.1.1	9-region_41	4	RPL35	9	127620159	127624260
Epithelial.Epithelial.1.1.1.1	9-region_41	4	ARPC5L	9	127624409	127640003
Epithelial.Epithelial.1.1.1.1	9-region_41	4	PPP6C	9	127908852	127952218
Epithelial.Epithelial.1.1.1.1	9-region_41	4	RABEPK	9	127962821	127996437
Epithelial.Epithelial.1.1.1.1	9-region_41	4	HSPA5	9	127997132	128003609
Epithelial.Epithelial.1.1.1.1	9-region_41	4	GAPVD1	9	128024073	128129486
Epithelial.Epithelial.1.1.1.1	9-region_41	4	MAPKAP1	9	128199672	128469513
Epithelial.Epithelial.1.1.1.1	11-region_45	4	IFITM3	11	319669	327537
Epithelial.Epithelial.1.1.1.1	11-region_45	4	PKP3	11	392614	404908
Epithelial.Epithelial.1.1.1.1	11-region_45	4	SIGIRR	11	405716	417455
Epithelial.Epithelial.1.1.1.1	11-region_45	4	ANO9	11	417933	442011
Epithelial.Epithelial.1.1.1.1	11-region_45	4	RNH1	11	494512	507300
Epithelial.Epithelial.1.1.1.1	11-region_45	4	HRAS	11	532242	537287
Epithelial.Epithelial.1.1.1.1	11-region_45	4	RASSF7	11	560404	564021
Epithelial.Epithelial.1.1.1.1	11-region_45	4	MIR210HG	11	565660	568457
Epithelial.Epithelial.1.1.1.1	11-region_45	4	PHRF1	11	576486	612222
Epithelial.Epithelial.1.1.1.1	11-region_45	4	IRF7	11	612553	615999
Epithelial.Epithelial.1.1.1.1	11-region_45	4	CDHR5	11	616565	626078
Epithelial.Epithelial.1.1.1.1	11-region_45	4	DEAF1	11	644233	706715
Epithelial.Epithelial.1.1.1.1	11-region_45	4	EPS8L2	11	694438	727727
Epithelial.Epithelial.1.1.1.1	11-region_45	4	TMEM80	11	695428	705028
Epithelial.Epithelial.1.1.1.1	11-region_45	4	TALDO1	11	747329	765024
Epithelial.Epithelial.1.1.1.1	11-region_45	4	PDDC1	11	767220	777488
Epithelial.Epithelial.1.1.1.1	11-region_45	4	RPLP2	11	809647	812880
Epithelial.Epithelial.1.1.1.1	11-region_45	4	PNPLA2	11	818902	825573
Epithelial.Epithelial.1.1.1.1	11-region_45	4	EFCAB4A	11	826144	831991
Epithelial.Epithelial.1.1.1.1	11-region_45	4	CD151	11	832843	839831
Epithelial.Epithelial.1.1.1.1	11-region_45	4	POLR2L	11	837356	842545
Epithelial.Epithelial.1.1.1.1	11-region_45	4	TSPAN4	11	842808	867116
Epithelial.Epithelial.1.1.1.1	11-region_45	4	CHID1	11	867357	915058
Epithelial.Epithelial.1.1.1.1	11-region_45	4	AP2A2	11	924894	1012239
Epithelial.Epithelial.1.1.1.1	11-region_45	4	MUC6	11	1012821	1036706
Epithelial.Epithelial.1.1.1.1	11-region_45	4	MUC5AC	11	1151580	1222364
Epithelial.Epithelial.1.1.1.1	11-region_45	4	MUC5B	11	1244296	1283406
Epithelial.Epithelial.1.1.1.1	11-region_45	4	TOLLIP	11	1295601	1330884
Epithelial.Epithelial.1.1.1.1	11-region_45	4	MOB2	11	1490687	1522477
Epithelial.Epithelial.1.1.1.1	11-region_45	4	DUSP8	11	1575274	1593150
Epithelial.Epithelial.1.1.1.1	11-region_45	4	CTSD	11	1773982	1785222
Epithelial.Epithelial.1.1.1.1	11-region_45	4	SYT8	11	1848709	1858751
Epithelial.Epithelial.1.1.1.1	11-region_45	4	TNNI2	11	1860219	1862910
Epithelial.Epithelial.1.1.1.1	11-region_45	4	LSP1	11	1874200	1913497
Epithelial.Epithelial.1.1.1.1	11-region_45	4	MRPL23	11	1968508	2005752
Epithelial.Epithelial.1.1.1.1	11-region_45	4	IGF2	11	2150342	2170833
Epithelial.Epithelial.1.1.1.1	11-region_45	4	CD81	11	2397407	2418649
Epithelial.Epithelial.1.1.1.1	11-region_45	4	TSSC4	11	2421718	2425106
Epithelial.Epithelial.1.1.1.1	11-region_45	4	KCNQ1	11	2465914	2870339
Epithelial.Epithelial.1.1.1.1	11-region_45	4	KCNQ1OT1	11	2629558	2721224
Epithelial.Epithelial.1.1.1.1	11-region_45	4	CDKN1C	11	2904443	2907111
Epithelial.Epithelial.1.1.1.1	11-region_45	4	SLC22A18AS	11	2909010	2924970
Epithelial.Epithelial.1.1.1.1	11-region_45	4	SLC22A18	11	2920951	2946476
Epithelial.Epithelial.1.1.1.1	11-region_45	4	PHLDA2	11	2949503	2950685
Epithelial.Epithelial.1.1.1.1	11-region_45	4	NAP1L4	11	2965667	3013607
Epithelial.Epithelial.1.1.1.1	11-region_45	4	CARS	11	3022152	3078843
Epithelial.Epithelial.1.1.1.1	11-region_45	4	ZNF195	11	3360491	3400448
Epithelial.Epithelial.1.1.1.1	11-region_45	4	NUP98	11	3692313	3819022
Epithelial.Epithelial.1.1.1.1	11-region_45	4	PGAP2	11	3818954	3847601
Epithelial.Epithelial.1.1.1.1	11-region_45	4	RHOG	11	3848208	3862213
Epithelial.Epithelial.1.1.1.1	11-region_45	4	STIM1	11	3875757	4114439
Epithelial.Epithelial.1.1.1.1	11-region_47	4	SVIP	11	22835345	22851845
Epithelial.Epithelial.1.1.1.1	11-region_47	4	CCDC34	11	27352374	27385415
Epithelial.Epithelial.1.1.1.1	11-region_47	4	LGR4	11	27387508	27494322
Epithelial.Epithelial.1.1.1.1	11-region_47	4	LIN7C	11	27516123	27528320
Epithelial.Epithelial.1.1.1.1	11-region_47	4	METTL15	11	28129795	28355054
Epithelial.Epithelial.1.1.1.1	11-region_47	4	ARL14EP	11	30344598	30359774
Epithelial.Epithelial.1.1.1.1	11-region_47	4	IMMP1L	11	31453948	31531192
Epithelial.Epithelial.1.1.1.1	11-region_47	4	RCN1	11	31833939	32127301
Epithelial.Epithelial.1.1.1.1	11-region_47	4	EIF3M	11	32605344	32627808
Epithelial.Epithelial.1.1.1.1	11-region_47	4	PRRG4	11	32851489	32879669
Epithelial.Epithelial.1.1.1.1	11-region_47	4	QSER1	11	32914724	33014862
Epithelial.Epithelial.1.1.1.1	11-region_47	4	CSTF3	11	33098734	33183917
Epithelial.Epithelial.1.1.1.1	11-region_47	4	HIPK3	11	33278218	33378569
Epithelial.Epithelial.1.1.1.1	11-region_47	4	CD59	11	33719807	33757991
Epithelial.Epithelial.1.1.1.1	11-region_47	4	FBXO3	11	33762485	33796089
Epithelial.Epithelial.1.1.1.1	11-region_47	4	CAPRIN1	11	34073230	34122703
Epithelial.Epithelial.1.1.1.1	11-region_47	4	CAT	11	34460472	34493609
Epithelial.Epithelial.1.1.1.1	11-region_47	4	EHF	11	34642640	34682604
Epithelial.Epithelial.1.1.1.1	11-region_47	4	APIP	11	34874641	34938046
Epithelial.Epithelial.1.1.1.1	11-region_47	4	PDHX	11	34937376	35042138
Epithelial.Epithelial.1.1.1.1	11-region_47	4	CD44	11	35160417	35253949
Epithelial.Epithelial.1.1.1.1	11-region_47	4	TRIM44	11	35684353	35829775
Epithelial.Epithelial.1.1.1.1	11-region_47	4	COMMD9	11	36295051	36310999
Epithelial.Epithelial.1.1.1.1	11-region_47	4	C11orf74	11	36616051	36694823
Epithelial.Epithelial.1.1.1.1	11-region_47	4	API5	11	43333513	43366079
Epithelial.Epithelial.1.1.1.1	11-region_47	4	TTC17	11	43380482	43516483
Epithelial.Epithelial.1.1.1.1	11-region_47	4	HSD17B12	11	43577986	43878167
Epithelial.Epithelial.1.1.1.1	11-region_47	4	ALKBH3	11	43902361	43941816
Epithelial.Epithelial.1.1.1.1	11-region_47	4	C11orf96	11	43946892	43965888
Epithelial.Epithelial.1.1.1.1	11-region_47	4	EXT2	11	44117099	44266979
Epithelial.Epithelial.1.1.1.1	11-region_47	4	CD82	11	44585977	44641913
Epithelial.Epithelial.1.1.1.1	11-region_47	4	TP53I11	11	44907454	44972840
Epithelial.Epithelial.1.1.1.1	11-region_47	4	SYT13	11	45261852	45307870
Epithelial.Epithelial.1.1.1.1	11-region_47	4	SLC35C1	11	45825623	45834566
Epithelial.Epithelial.1.1.1.1	11-region_47	4	CRY2	11	45868669	45904798
Epithelial.Epithelial.1.1.1.1	11-region_47	4	PEX16	11	45931220	45940363
Epithelial.Epithelial.1.1.1.1	11-region_47	4	CREB3L1	11	46299212	46342972
Epithelial.Epithelial.1.1.1.1	11-region_47	4	DGKZ	11	46354455	46402104
Epithelial.Epithelial.1.1.1.1	11-region_47	4	MDK	11	46402306	46405375
Epithelial.Epithelial.1.1.1.1	11-region_47	4	ATG13	11	46638826	46696368
Epithelial.Epithelial.1.1.1.1	11-region_47	4	ARHGAP1	11	46698630	46722165
Epithelial.Epithelial.1.1.1.1	11-region_47	4	CKAP5	11	46764598	46867847
Epithelial.Epithelial.1.1.1.1	11-region_47	4	C11orf49	11	46958240	47185936
Epithelial.Epithelial.1.1.1.1	11-region_47	4	ARFGAP2	11	47185848	47198676
Epithelial.Epithelial.1.1.1.1	11-region_47	4	ACP2	11	47260853	47270457
Epithelial.Epithelial.1.1.1.1	11-region_47	4	NR1H3	11	47269851	47290396
Epithelial.Epithelial.1.1.1.1	11-region_47	4	MADD	11	47290712	47351582
Epithelial.Epithelial.1.1.1.1	11-region_47	4	SLC39A13	11	47428683	47438047
Epithelial.Epithelial.1.1.1.1	11-region_47	4	PSMC3	11	47440320	47447993
Epithelial.Epithelial.1.1.1.1	11-region_47	4	CELF1	11	47487496	47587121
Epithelial.Epithelial.1.1.1.1	11-region_47	4	NDUFS3	11	47586888	47606114
Epithelial.Epithelial.1.1.1.1	11-region_47	4	PTPMT1	11	47586982	47595013
Epithelial.Epithelial.1.1.1.1	11-region_47	4	MTCH2	11	47638867	47664175
Epithelial.Epithelial.1.1.1.1	11-region_47	4	FNBP4	11	47738072	47788995
Epithelial.Epithelial.1.1.1.1	11-region_47	4	NUP160	11	47799639	47870107
Epithelial.Epithelial.1.1.1.1	11-region_47	4	TNKS1BP1	11	57067112	57092426
Epithelial.Epithelial.1.1.1.1	11-region_47	4	SSRP1	11	57093459	57103351
Epithelial.Epithelial.1.1.1.1	11-region_47	4	SLC43A3	11	57174427	57195053
Epithelial.Epithelial.1.1.1.1	11-region_47	4	TIMM10	11	57295936	57298276
Epithelial.Epithelial.1.1.1.1	11-region_49	2	TIMM8B	11	111955524	111957522
Epithelial.Epithelial.1.1.1.1	11-region_49	2	SDHD	11	111957497	112064528
Epithelial.Epithelial.1.1.1.1	11-region_49	2	IL18	11	112013974	112034840
Epithelial.Epithelial.1.1.1.1	11-region_49	2	PTS	11	112097088	112140678
Epithelial.Epithelial.1.1.1.1	11-region_49	2	NNMT	11	114128509	114184007
Epithelial.Epithelial.1.1.1.1	11-region_49	2	RBM7	11	114270752	114284925
Epithelial.Epithelial.1.1.1.1	11-region_49	2	REXO2	11	114310108	114321001
Epithelial.Epithelial.1.1.1.1	11-region_49	2	ZNF259	11	116648436	116658766
Epithelial.Epithelial.1.1.1.1	11-region_49	2	SIK3	11	116714118	116969153
Epithelial.Epithelial.1.1.1.1	11-region_49	2	PAFAH1B2	11	117014983	117047610
Epithelial.Epithelial.1.1.1.1	11-region_49	2	TAGLN	11	117070037	117075498
Epithelial.Epithelial.1.1.1.1	11-region_49	2	PCSK7	11	117075053	117103241
Epithelial.Epithelial.1.1.1.1	11-region_49	2	RNF214	11	117103341	117157161
Epithelial.Epithelial.1.1.1.1	11-region_49	2	CEP164	11	117185273	117283984
Epithelial.Epithelial.1.1.1.1	11-region_49	2	FXYD2	11	117671559	117699413
Epithelial.Epithelial.1.1.1.1	11-region_49	2	TMPRSS4	11	117947753	117992605
Epithelial.Epithelial.1.1.1.1	11-region_49	2	MPZL3	11	118097409	118123065
Epithelial.Epithelial.1.1.1.1	11-region_49	2	MPZL2	11	118124118	118135251
Epithelial.Epithelial.1.1.1.1	11-region_49	2	CD3E	11	118175260	118186890
Epithelial.Epithelial.1.1.1.1	11-region_49	2	CD3D	11	118209669	118213459
Epithelial.Epithelial.1.1.1.1	11-region_49	2	CD3G	11	118215059	118225876
Epithelial.Epithelial.1.1.1.1	11-region_49	2	UBE4A	11	118230300	118269926
Epithelial.Epithelial.1.1.1.1	11-region_49	2	ATP5L	11	118271869	118302211
Epithelial.Epithelial.1.1.1.1	11-region_49	2	KMT2A	11	118307205	118397539
Epithelial.Epithelial.1.1.1.1	11-region_49	2	ARCN1	11	118443105	118473748
Epithelial.Epithelial.1.1.1.1	11-region_49	2	PHLDB1	11	118477155	118528741
Epithelial.Epithelial.1.1.1.1	11-region_49	2	DDX6	11	118620034	118661858
Epithelial.Epithelial.1.1.1.1	11-region_49	2	BCL9L	11	118764584	118796317
Epithelial.Epithelial.1.1.1.1	11-region_49	2	CCDC84	11	118868852	118886501
Epithelial.Epithelial.1.1.1.1	11-region_49	2	RPS25	11	118886422	118889401
Epithelial.Epithelial.1.1.1.1	11-region_49	2	TRAPPC4	11	118889142	118896164
Epithelial.Epithelial.1.1.1.1	11-region_49	2	SLC37A4	11	118894824	118901616
Epithelial.Epithelial.1.1.1.1	11-region_49	2	HYOU1	11	118914900	118927913
Epithelial.Epithelial.1.1.1.1	11-region_49	2	HMBS	11	118955576	118964259
Epithelial.Epithelial.1.1.1.1	11-region_49	2	H2AFX	11	118964564	118966177
Epithelial.Epithelial.1.1.1.1	11-region_49	2	DPAGT1	11	118967213	118979041
Epithelial.Epithelial.1.1.1.1	11-region_49	2	CBL	11	119076752	119178859
Epithelial.Epithelial.1.1.1.1	11-region_49	2	RNF26	11	119205237	119208023
Epithelial.Epithelial.1.1.1.1	11-region_49	2	PVRL1	11	119494120	119599794
Epithelial.Epithelial.1.1.1.1	11-region_49	2	TRIM29	11	119981983	120056237
Epithelial.Epithelial.1.1.1.1	11-region_49	2	OAF	11	120081475	120101041
Epithelial.Epithelial.1.1.1.1	11-region_49	2	TMEM136	11	120195838	120204391
Epithelial.Epithelial.1.1.1.1	11-region_49	2	ARHGEF12	11	120207787	120360645
Epithelial.Epithelial.1.1.1.1	11-region_49	2	SC5D	11	121163162	121179403
Epithelial.Epithelial.1.1.1.1	11-region_49	2	SORL1	11	121322912	121504402
Epithelial.Epithelial.1.1.1.1	11-region_49	2	HSPA8	11	122928197	122933938
Epithelial.Epithelial.1.1.1.1	11-region_49	2	GRAMD1B	11	123396344	123498482
Epithelial.Epithelial.1.1.1.1	11-region_49	2	VWA5A	11	123986069	124018428
Epithelial.Epithelial.1.1.1.1	11-region_49	2	TBRG1	11	124492732	124505287
Epithelial.Epithelial.1.1.1.1	11-region_49	2	SIAE	11	124503009	124565603
Epithelial.Epithelial.1.1.1.1	11-region_49	2	SPA17	11	124543694	124567414
Epithelial.Epithelial.1.1.1.1	11-region_49	2	VSIG2	11	124617368	124622134
Epithelial.Epithelial.1.1.1.1	11-region_49	2	ESAM	11	124622026	124632186
Epithelial.Epithelial.1.1.1.1	11-region_49	2	TMEM218	11	124966398	124981659
Epithelial.Epithelial.1.1.1.1	11-region_49	2	EI24	11	125439112	125454575
Epithelial.Epithelial.1.1.1.1	11-region_49	2	STT3A	11	125461607	125495110
Epithelial.Epithelial.1.1.1.1	11-region_49	2	RPUSD4	11	126071993	126081587
Epithelial.Epithelial.1.1.1.1	11-region_49	2	FAM118B	11	126081309	126132881
Epithelial.Epithelial.1.1.1.1	11-region_49	2	SRPR	11	126132814	126139039
Epithelial.Epithelial.1.1.1.1	11-region_49	2	FOXRED1	11	126138950	126148026
Epithelial.Epithelial.1.1.1.1	11-region_49	2	DCPS	11	126173647	126215644
Epithelial.Epithelial.1.1.1.1	11-region_49	2	ST3GAL4	11	126225535	126310239
Epithelial.Epithelial.1.1.1.1	12-region_52	4	CCNT1	12	49082247	49110681
Epithelial.Epithelial.1.1.1.1	12-region_52	4	DDX23	12	49223547	49246625
Epithelial.Epithelial.1.1.1.1	12-region_52	4	RND1	12	49250928	49259681
Epithelial.Epithelial.1.1.1.1	12-region_52	4	FKBP11	12	49315301	49320257
Epithelial.Epithelial.1.1.1.1	12-region_52	4	ARF3	12	49329506	49351334
Epithelial.Epithelial.1.1.1.1	12-region_52	4	PRKAG1	12	49396057	49412980
Epithelial.Epithelial.1.1.1.1	12-region_52	4	TUBA1B	12	49521565	49525180
Epithelial.Epithelial.1.1.1.1	12-region_52	4	TUBA1A	12	49578579	49583107
Epithelial.Epithelial.1.1.1.1	12-region_52	4	TUBA1C	12	49582519	49667114
Epithelial.Epithelial.1.1.1.1	12-region_52	4	DNAJC22	12	49740700	49751309
Epithelial.Epithelial.1.1.1.1	12-region_52	4	SPATS2	12	49760367	49921205
Epithelial.Epithelial.1.1.1.1	12-region_52	4	MCRS1	12	49950327	49961936
Epithelial.Epithelial.1.1.1.1	12-region_52	4	TMBIM6	12	50101508	50158717
Epithelial.Epithelial.1.1.1.1	12-region_52	4	RP11-469H8.6	12	50345295	50356707
Epithelial.Epithelial.1.1.1.1	12-region_52	4	AQP5	12	50355653	50359464
Epithelial.Epithelial.1.1.1.1	12-region_52	4	SMARCD1	12	50478755	50494495
Epithelial.Epithelial.1.1.1.1	12-region_52	4	COX14	12	50505762	50514240
Epithelial.Epithelial.1.1.1.1	12-region_52	4	LIMA1	12	50569571	50677329
Epithelial.Epithelial.1.1.1.1	12-region_52	4	LARP4	12	50786166	50873787
Epithelial.Epithelial.1.1.1.1	12-region_52	4	DIP2B	12	50898768	51142450
Epithelial.Epithelial.1.1.1.1	12-region_52	4	ATF1	12	51157493	51214905
Epithelial.Epithelial.1.1.1.1	12-region_52	4	METTL7A	12	51317255	51326300
Epithelial.Epithelial.1.1.1.1	12-region_52	4	SLC11A2	12	51373184	51422349
Epithelial.Epithelial.1.1.1.1	12-region_52	4	LETMD1	12	51441745	51454207
Epithelial.Epithelial.1.1.1.1	12-region_52	4	TFCP2	12	51487446	51566926
Epithelial.Epithelial.1.1.1.1	12-region_52	4	DAZAP2	12	51632076	51665146
Epithelial.Epithelial.1.1.1.1	12-region_52	4	SMAGP	12	51638342	51664674
Epithelial.Epithelial.1.1.1.1	12-region_52	4	GALNT6	12	51745031	51786651
Epithelial.Epithelial.1.1.1.1	12-region_52	4	ACVR1B	12	52345451	52390862
Epithelial.Epithelial.1.1.1.1	12-region_52	4	NR4A1	12	52416616	52453291
Epithelial.Epithelial.1.1.1.1	12-region_52	4	C12orf44	12	52463030	52471278
Epithelial.Epithelial.1.1.1.1	12-region_52	4	KRT80	12	52562780	52585784
Epithelial.Epithelial.1.1.1.1	12-region_52	4	KRT7	12	52626304	52645970
Epithelial.Epithelial.1.1.1.1	12-region_52	4	KRT81	12	52679697	52685318
Epithelial.Epithelial.1.1.1.1	12-region_52	4	KRT6A	12	52880958	52887041
Epithelial.Epithelial.1.1.1.1	12-region_52	4	KRT8	12	53290977	53343738
Epithelial.Epithelial.1.1.1.1	12-region_52	4	KRT18	12	53342655	53346685
Epithelial.Epithelial.1.1.1.1	12-region_52	4	EIF4B	12	53399942	53435993
Epithelial.Epithelial.1.1.1.1	12-region_52	4	SPRYD3	12	53458388	53473204
Epithelial.Epithelial.1.1.1.1	12-region_52	4	IGFBP6	12	53491220	53496129
Epithelial.Epithelial.1.1.1.1	12-region_52	4	CSAD	12	53551447	53575135
Epithelial.Epithelial.1.1.1.1	12-region_52	4	RARG	12	53604354	53626764
Epithelial.Epithelial.1.1.1.1	12-region_52	4	MFSD5	12	53645035	53648189
Epithelial.Epithelial.1.1.1.1	12-region_52	4	PFDN5	12	53689075	53693234
Epithelial.Epithelial.1.1.1.1	12-region_52	4	C12orf10	12	53693470	53700961
Epithelial.Epithelial.1.1.1.1	12-region_52	4	AAAS	12	53701240	53718648
Epithelial.Epithelial.1.1.1.1	12-region_52	4	SP1	12	53773960	53810230
Epithelial.Epithelial.1.1.1.1	12-region_52	4	PRR13	12	53835389	53840429
Epithelial.Epithelial.1.1.1.1	12-region_52	4	PCBP2	12	53835525	53874946
Epithelial.Epithelial.1.1.1.1	12-region_52	4	TARBP2	12	53894705	53900215
Epithelial.Epithelial.1.1.1.1	12-region_52	4	ATF7	12	53901640	54020199
Epithelial.Epithelial.1.1.1.1	12-region_52	4	ATP5G2	12	54026510	54071192
Epithelial.Epithelial.1.1.1.1	12-region_52	4	CALCOCO1	12	54104903	54121529
Epithelial.Epithelial.1.1.1.1	12-region_52	4	RP11-834C11.4	12	54519882	54526627
Epithelial.Epithelial.1.1.1.1	12-region_52	4	SMUG1	12	54558529	54582778
Epithelial.Epithelial.1.1.1.1	12-region_52	4	CBX5	12	54624724	54673886
Epithelial.Epithelial.1.1.1.1	12-region_52	4	HNRNPA1	12	54673977	54680872
Epithelial.Epithelial.1.1.1.1	12-region_52	4	COPZ1	12	54694986	54745633
Epithelial.Epithelial.1.1.1.1	13-region_55	2	MTMR6	13	25802307	25862147
Epithelial.Epithelial.1.1.1.1	13-region_55	2	NUPL1	13	25875662	25923938
Epithelial.Epithelial.1.1.1.1	13-region_55	2	RNF6	13	26706253	26796791
Epithelial.Epithelial.1.1.1.1	13-region_55	2	USP12	13	27640293	27746033
Epithelial.Epithelial.1.1.1.1	13-region_55	2	RPL21	13	27825446	27830828
Epithelial.Epithelial.1.1.1.1	13-region_55	2	GTF3A	13	27998681	28009958
Epithelial.Epithelial.1.1.1.1	13-region_55	2	MTIF3	13	28009776	28024739
Epithelial.Epithelial.1.1.1.1	13-region_55	2	LNX2	13	28120050	28194541
Epithelial.Epithelial.1.1.1.1	13-region_55	2	POLR1D	13	28194903	28241548
Epithelial.Epithelial.1.1.1.1	13-region_55	2	ATP5EP2	13	28519343	28519727
Epithelial.Epithelial.1.1.1.1	13-region_55	2	PAN3	13	28712643	28869475
Epithelial.Epithelial.1.1.1.1	13-region_55	2	POMP	13	29233241	29253062
Epithelial.Epithelial.1.1.1.1	13-region_55	2	SLC7A1	13	30083547	30169825
Epithelial.Epithelial.1.1.1.1	13-region_55	2	UBL3	13	30338508	30424821
Epithelial.Epithelial.1.1.1.1	13-region_55	2	HMGB1	13	31032884	31191734
Epithelial.Epithelial.1.1.1.1	13-region_55	2	ALOX5AP	13	31309645	31338556
Epithelial.Epithelial.1.1.1.1	13-region_55	2	HSPH1	13	31710762	31736525
Epithelial.Epithelial.1.1.1.1	13-region_55	2	FRY	13	32605437	32870794
Epithelial.Epithelial.1.1.1.1	13-region_55	2	N4BP2L2	13	33006554	33112970
Epithelial.Epithelial.1.1.1.1	13-region_55	2	PDS5B	13	33160564	33352157
Epithelial.Epithelial.1.1.1.1	13-region_55	2	ALG5	13	37523912	37574398
Epithelial.Epithelial.1.1.1.1	13-region_55	2	EXOSC8	13	37572953	37583750
Epithelial.Epithelial.1.1.1.1	13-region_55	2	SUPT20H	13	37583449	37633850
Epithelial.Epithelial.1.1.1.1	13-region_55	2	UFM1	13	38923986	38937140
Epithelial.Epithelial.1.1.1.1	13-region_55	2	NHLRC3	13	39612443	39624246
Epithelial.Epithelial.1.1.1.1	13-region_55	2	COG6	13	40229764	40365802
Epithelial.Epithelial.1.1.1.1	13-region_55	2	FOXO1	13	41129804	41240734
Epithelial.Epithelial.1.1.1.1	13-region_55	2	MRPS31	13	41303432	41345309
Epithelial.Epithelial.1.1.1.1	13-region_55	2	ELF1	13	41506056	41635576
Epithelial.Epithelial.1.1.1.1	13-region_55	2	WBP4	13	41635410	41658137
Epithelial.Epithelial.1.1.1.1	13-region_55	2	NAA16	13	41885341	41951166
Epithelial.Epithelial.1.1.1.1	13-region_55	2	RGCC	13	42031695	42045018
Epithelial.Epithelial.1.1.1.1	13-region_55	2	DGKH	13	42614176	42830714
Epithelial.Epithelial.1.1.1.1	13-region_55	2	AKAP11	13	42846289	42897396
Epithelial.Epithelial.1.1.1.1	13-region_55	2	EPSTI1	13	43460524	43566407
Epithelial.Epithelial.1.1.1.1	13-region_55	2	DNAJC15	13	43597339	43683045
Epithelial.Epithelial.1.1.1.1	13-region_55	2	TSC22D1	13	45007655	45151283
Epithelial.Epithelial.1.1.1.1	13-region_55	2	GPALPP1	13	45563687	45607746
Epithelial.Epithelial.1.1.1.1	13-region_55	2	GTF2F2	13	45694650	45858237
Epithelial.Epithelial.1.1.1.1	13-region_55	2	TPT1	13	45911008	45915505
Epithelial.Epithelial.1.1.1.1	13-region_55	2	RP11-290D2.6	13	45914174	45915318
Epithelial.Epithelial.1.1.1.1	13-region_55	2	TPT1-AS1	13	45915480	45965872
Epithelial.Epithelial.1.1.1.1	13-region_55	2	COG3	13	46039060	46110765
Epithelial.Epithelial.1.1.1.1	13-region_55	2	ZC3H13	13	46528600	46626894
Epithelial.Epithelial.1.1.1.1	13-region_55	2	LCP1	13	46700055	46786006
Epithelial.Epithelial.1.1.1.1	13-region_55	2	LRCH1	13	47127303	47327175
Epithelial.Epithelial.1.1.1.1	13-region_55	2	ESD	13	47345391	47371367
Epithelial.Epithelial.1.1.1.1	13-region_55	2	SUCLA2	13	48510622	48612125
Epithelial.Epithelial.1.1.1.1	13-region_55	2	NUDT15	13	48611703	48621358
Epithelial.Epithelial.1.1.1.1	14-region_58	4	TMEM30B	14	61744088	61748558
Epithelial.Epithelial.1.1.1.1	14-region_58	4	HIF1A	14	62162231	62214976
Epithelial.Epithelial.1.1.1.1	14-region_58	4	SNAPC1	14	62229075	62263146
Epithelial.Epithelial.1.1.1.1	14-region_58	4	PPP2R5E	14	63838075	64010092
Epithelial.Epithelial.1.1.1.1	14-region_58	4	SYNE2	14	64319683	64693165
Epithelial.Epithelial.1.1.1.1	14-region_58	4	MTHFD1	14	64854749	64926722
Epithelial.Epithelial.1.1.1.1	14-region_58	4	ZBTB1	14	64970430	65000408
Epithelial.Epithelial.1.1.1.1	14-region_58	4	HSPA2	14	65002623	65009955
Epithelial.Epithelial.1.1.1.1	14-region_58	4	PLEKHG3	14	65170820	65213610
Epithelial.Epithelial.1.1.1.1	14-region_58	4	CHURC1	14	65381079	65411309
Epithelial.Epithelial.1.1.1.1	14-region_58	4	GPX2	14	65405870	65409531
Epithelial.Epithelial.1.1.1.1	14-region_58	4	MAX	14	65472892	65569413
Epithelial.Epithelial.1.1.1.1	14-region_58	4	FUT8	14	65877310	66210839
Epithelial.Epithelial.1.1.1.1	14-region_58	4	GPHN	14	66974125	67648520
Epithelial.Epithelial.1.1.1.1	14-region_58	4	MPP5	14	67707826	67802536
Epithelial.Epithelial.1.1.1.1	14-region_58	4	ATP6V1D	14	67761088	67826982
Epithelial.Epithelial.1.1.1.1	14-region_58	4	EIF2S1	14	67826714	67853233
Epithelial.Epithelial.1.1.1.1	14-region_58	4	PLEK2	14	67853700	67878917
Epithelial.Epithelial.1.1.1.1	14-region_58	4	PIGH	14	68048672	68067004
Epithelial.Epithelial.1.1.1.1	14-region_58	4	VTI1B	14	68113792	68141548
Epithelial.Epithelial.1.1.1.1	14-region_58	4	RDH11	14	68143518	68162531
Epithelial.Epithelial.1.1.1.1	14-region_58	4	ZFP36L1	14	69254377	69263190
Epithelial.Epithelial.1.1.1.1	14-region_58	4	ACTN1	14	69340860	69446157
Epithelial.Epithelial.1.1.1.1	14-region_58	4	DCAF5	14	69517598	69619867
Epithelial.Epithelial.1.1.1.1	14-region_58	4	ERH	14	69846848	69865344
Epithelial.Epithelial.1.1.1.1	14-region_58	4	SLC39A9	14	69864732	69929105
Epithelial.Epithelial.1.1.1.1	14-region_58	4	KIAA0247	14	70078313	70181859
Epithelial.Epithelial.1.1.1.1	14-region_58	4	SRSF5	14	70193617	70238722
Epithelial.Epithelial.1.1.1.1	14-region_58	4	COX16	14	70791798	70826448
Epithelial.Epithelial.1.1.1.1	14-region_58	4	SYNJ2BP	14	70838148	70883778
Epithelial.Epithelial.1.1.1.1	14-region_58	4	MED6	14	71047974	71067384
Epithelial.Epithelial.1.1.1.1	14-region_58	4	PCNX	14	71374122	71582099
Epithelial.Epithelial.1.1.1.1	14-region_58	4	SIPA1L1	14	71787166	72207946
Epithelial.Epithelial.1.1.1.1	14-region_58	4	RBM25	14	73525144	73588122
Epithelial.Epithelial.1.1.1.1	14-region_58	4	PSEN1	14	73603126	73690399
Epithelial.Epithelial.1.1.1.1	14-region_58	4	NUMB	14	73741815	73930348
Epithelial.Epithelial.1.1.1.1	14-region_58	4	DNAL1	14	74111578	74170435
Epithelial.Epithelial.1.1.1.1	14-region_58	4	PNMA1	14	74178494	74181128
Epithelial.Epithelial.1.1.1.1	14-region_58	4	ELMSAN1	14	74181825	74256988
Epithelial.Epithelial.1.1.1.1	14-region_58	4	COQ6	14	74416629	74430373
Epithelial.Epithelial.1.1.1.1	14-region_58	4	ENTPD5	14	74424713	74486102
Epithelial.Epithelial.1.1.1.1	14-region_58	4	ALDH6A1	14	74523553	74551196
Epithelial.Epithelial.1.1.1.1	14-region_58	4	ABCD4	14	74752126	74769759
Epithelial.Epithelial.1.1.1.1	14-region_58	4	NPC2	14	74942895	74960880
Epithelial.Epithelial.1.1.1.1	14-region_58	4	ISCA2	14	74960423	74963809
Epithelial.Epithelial.1.1.1.1	14-region_58	4	FCF1	14	75179847	75203394
Epithelial.Epithelial.1.1.1.1	14-region_58	4	YLPM1	14	75230069	75322244
Epithelial.Epithelial.1.1.1.1	14-region_58	4	DLST	14	75348594	75370448
Epithelial.Epithelial.1.1.1.1	14-region_58	4	EIF2B2	14	75469614	75476292
Epithelial.Epithelial.1.1.1.1	14-region_58	4	MLH3	14	75480467	75518235
Epithelial.Epithelial.1.1.1.1	14-region_58	4	ACYP1	14	75519924	75536186
Epithelial.Epithelial.1.1.1.1	14-region_58	4	NEK9	14	75548822	75594047
Epithelial.Epithelial.1.1.1.1	14-region_58	4	TMED10	14	75598173	75643334
Epithelial.Epithelial.1.1.1.1	14-region_58	4	FOS	14	75745477	75748933
Epithelial.Epithelial.1.1.1.1	14-region_58	4	BATF	14	75988768	76013358
Epithelial.Epithelial.1.1.1.1	14-region_58	4	C14orf1	14	76116134	76127532
Epithelial.Epithelial.1.1.1.1	14-region_58	4	IFT43	14	76368479	76550928
Epithelial.Epithelial.1.1.1.1	14-region_58	4	GPATCH2L	14	76618259	76720685
Epithelial.Epithelial.1.1.1.1	14-region_58	4	IRF2BPL	14	77490888	77495034
Epithelial.Epithelial.1.1.1.1	14-region_58	4	GSTZ1	14	77787227	77797940
Epithelial.Epithelial.1.1.1.1	14-region_58	4	AHSA1	14	77924213	77935817
Epithelial.Epithelial.1.1.1.1	14-region_58	4	SPTLC2	14	77972340	78083116
Epithelial.Epithelial.1.1.1.1	14-region_58	4	SLIRP	14	78174414	78227447
Epithelial.Epithelial.1.1.1.1	14-region_58	4	SNW1	14	78183942	78227550
Epithelial.Epithelial.1.1.1.1	14-region_58	4	GTF2A1	14	81641796	81687721
Epithelial.Epithelial.1.1.1.1	14-region_58	4	SEL1L	14	81937893	82000205
Epithelial.Epithelial.1.1.1.1	14-region_58	4	GALC	14	88304164	88460009
Epithelial.Epithelial.1.1.1.1	14-region_58	4	ZC3H14	14	89029253	89079853
Epithelial.Epithelial.1.1.1.1	14-region_58	4	FOXN3	14	89591215	90085493
Epithelial.Epithelial.1.1.1.1	14-region_58	4	PSMC1	14	90722839	90738968
Epithelial.Epithelial.1.1.1.1	14-region_58	4	NRDE2	14	90742580	90798481
Epithelial.Epithelial.1.1.1.1	14-region_58	4	CALM1	14	90862846	90874605
Epithelial.Epithelial.1.1.1.1	14-region_58	4	RPS6KA5	14	91336799	91526980
Epithelial.Epithelial.1.1.1.1	14-region_58	4	C14orf159	14	91526677	91691976
Epithelial.Epithelial.1.1.1.1	14-region_58	4	CCDC88C	14	91737667	91884188
Epithelial.Epithelial.1.1.1.1	14-region_58	4	SMEK1	14	91923955	91976898
Epithelial.Epithelial.1.1.1.1	14-region_58	4	TC2N	14	92246095	92333880
Epithelial.Epithelial.1.1.1.1	14-region_58	4	TRIP11	14	92432335	92507240
Epithelial.Epithelial.1.1.1.1	14-region_58	4	ATXN3	14	92524896	92572965
Epithelial.Epithelial.1.1.1.1	14-region_58	4	NDUFB1	14	92582466	92588261
Epithelial.Epithelial.1.1.1.1	14-region_58	4	CPSF2	14	92588281	92630755
Epithelial.Epithelial.1.1.1.1	14-region_58	4	LGMN	14	93170152	93215047
Epithelial.Epithelial.1.1.1.1	14-region_58	4	GOLGA5	14	93260576	93306308
Epithelial.Epithelial.1.1.1.1	14-region_58	4	ITPK1	14	93403259	93582665
Epithelial.Epithelial.1.1.1.1	14-region_58	4	MOAP1	14	93648541	93651273
Epithelial.Epithelial.1.1.1.1	14-region_58	4	TMEM251	14	93651296	93653434
Epithelial.Epithelial.1.1.1.1	14-region_58	4	C14orf142	14	93669239	93673439
Epithelial.Epithelial.1.1.1.1	14-region_58	4	BTBD7	14	93703896	93799438
Epithelial.Epithelial.1.1.1.1	14-region_58	4	DDX24	14	94517266	94547591
Epithelial.Epithelial.1.1.1.1	14-region_58	4	IFI27L1	14	94547628	94570192
Epithelial.Epithelial.1.1.1.1	14-region_58	4	IFI27	14	94571182	94583033
Epithelial.Epithelial.1.1.1.1	14-region_58	4	IFI27L2	14	94594116	94596590
Epithelial.Epithelial.1.1.1.1	14-region_58	4	SERPINA1	14	94843084	94857030
Epithelial.Epithelial.1.1.1.1	14-region_58	4	SERPINA4	14	95027428	95036250
Epithelial.Epithelial.1.1.1.1	14-region_58	4	SERPINA5	14	95027779	95059457
Epithelial.Epithelial.1.1.1.1	14-region_58	4	SERPINA3	14	95078714	95090392
Epithelial.Epithelial.1.1.1.1	14-region_58	4	DICER1	14	95552565	95624347
Epithelial.Epithelial.1.1.1.1	14-region_58	4	CLMN	14	95648277	95786243
Epithelial.Epithelial.1.1.1.1	14-region_58	4	GLRX5	14	95999840	96011061
Epithelial.Epithelial.1.1.1.1	14-region_58	4	GSKIP	14	96829814	96853625
Epithelial.Epithelial.1.1.1.1	14-region_58	4	PAPOLA	14	96967770	97033448
Epithelial.Epithelial.1.1.1.1	14-region_58	4	VRK1	14	97263641	97398059
Epithelial.Epithelial.1.1.1.1	14-region_58	4	SETD3	14	99864083	99947216
Epithelial.Epithelial.1.1.1.1	14-region_58	4	CCNK	14	99947506	100001381
Epithelial.Epithelial.1.1.1.1	14-region_58	4	EVL	14	100437786	100610573
Epithelial.Epithelial.1.1.1.1	14-region_58	4	DEGS2	14	100612756	100626500
Epithelial.Epithelial.1.1.1.1	14-region_58	4	YY1	14	100704635	100749129
Epithelial.Epithelial.1.1.1.1	14-region_58	4	SLC25A29	14	100757448	100772884
Epithelial.Epithelial.1.1.1.1	14-region_58	4	WARS	14	100800125	100843142
Epithelial.Epithelial.1.1.1.1	14-region_58	4	MEG3	14	101245747	101327368
Epithelial.Epithelial.1.1.1.1	14-region_58	4	PPP2R5C	14	102228135	102394326
Epithelial.Epithelial.1.1.1.1	14-region_58	4	DYNC1H1	14	102430865	102517129
Epithelial.Epithelial.1.1.1.1	14-region_58	4	HSP90AA1	14	102547075	102606036
Epithelial.Epithelial.1.1.1.1	14-region_58	4	WDR20	14	102605840	102691184
Epithelial.Epithelial.1.1.1.1	14-region_58	4	MOK	14	102690837	102771537
Epithelial.Epithelial.1.1.1.1	14-region_58	4	CINP	14	102808956	102829253
Epithelial.Epithelial.1.1.1.1	14-region_58	4	ANKRD9	14	102973179	102976136
Epithelial.Epithelial.1.1.1.1	14-region_58	4	RCOR1	14	103058998	103196913
Epithelial.Epithelial.1.1.1.1	14-region_58	4	TRAF3	14	103243813	103377837
Epithelial.Epithelial.1.1.1.1	14-region_58	4	AMN	14	103388993	103399933
Epithelial.Epithelial.1.1.1.1	14-region_58	4	CDC42BPB	14	103398716	103523799
Epithelial.Epithelial.1.1.1.1	14-region_58	4	TNFAIP2	14	103589779	103603776
Epithelial.Epithelial.1.1.1.1	14-region_58	4	EIF5	14	103799881	103811362
Epithelial.Epithelial.1.1.1.1	14-region_58	4	MARK3	14	103851729	103970168
Epithelial.Epithelial.1.1.1.1	14-region_58	4	CKB	14	103985996	103989448
Epithelial.Epithelial.1.1.1.1	14-region_58	4	TRMT61A	14	103995521	104003410
Epithelial.Epithelial.1.1.1.1	14-region_58	4	BAG5	14	104022881	104029168
Epithelial.Epithelial.1.1.1.1	14-region_58	4	KLC1	14	104028233	104167888
Epithelial.Epithelial.1.1.1.1	14-region_58	4	APOPT1	14	104029299	104073860
Epithelial.Epithelial.1.1.1.1	14-region_58	4	ZFYVE21	14	104182067	104200005
Epithelial.Epithelial.1.1.1.1	14-region_58	4	PPP1R13B	14	104200089	104313927
Epithelial.Epithelial.1.1.1.1	14-region_58	4	C14orf2	14	104378625	104394606
Epithelial.Epithelial.1.1.1.1	14-region_58	4	INF2	14	105155943	105185942
Epithelial.Epithelial.1.1.1.1	14-region_58	4	SIVA1	14	105219437	105234831
Epithelial.Epithelial.1.1.1.1	14-region_58	4	AKT1	14	105235686	105262088
Epithelial.Epithelial.1.1.1.1	14-region_58	4	CEP170B	14	105331617	105363107
Epithelial.Epithelial.1.1.1.1	14-region_58	4	AHNAK2	14	105403581	105444694
Epithelial.Epithelial.1.1.1.1	14-region_58	4	CDCA4	14	105475910	105487485
Epithelial.Epithelial.1.1.1.1	14-region_58	4	NUDT14	14	105639275	105647660
Epithelial.Epithelial.1.1.1.1	14-region_58	4	PACS2	14	105766900	105864484
Epithelial.Epithelial.1.1.1.1	14-region_58	4	MTA1	14	105886159	105937066
Epithelial.Epithelial.1.1.1.1	14-region_58	4	CRIP2	14	105939299	105946499
Epithelial.Epithelial.1.1.1.1	14-region_58	4	CRIP1	14	105952654	105958604
Epithelial.Epithelial.1.1.1.1	14-region_58	4	IGHA1	14	106173457	106175002
Epithelial.Epithelial.1.1.1.1	15-region_60	4	DUOX2	15	45384848	45406542
Epithelial.Epithelial.1.1.1.1	15-region_60	4	DUOXA2	15	45406519	45410619
Epithelial.Epithelial.1.1.1.1	15-region_60	4	GATM	15	45653322	45694525
Epithelial.Epithelial.1.1.1.1	15-region_60	4	C15orf48	15	45722727	45740959
Epithelial.Epithelial.1.1.1.1	15-region_60	4	BLOC1S6	15	45879321	45908197
Epithelial.Epithelial.1.1.1.1	15-region_60	4	SQRDL	15	45923346	45983492
Epithelial.Epithelial.1.1.1.1	15-region_60	4	DUT	15	48623208	48635570
Epithelial.Epithelial.1.1.1.1	15-region_60	4	EID1	15	49170083	49172380
Epithelial.Epithelial.1.1.1.1	15-region_60	4	SECISBP2L	15	49280673	49338760
Epithelial.Epithelial.1.1.1.1	15-region_60	4	COPS2	15	49398268	49447858
Epithelial.Epithelial.1.1.1.1	15-region_60	4	GALK2	15	49447853	49660066
Epithelial.Epithelial.1.1.1.1	15-region_60	4	DTWD1	15	49913177	49937333
Epithelial.Epithelial.1.1.1.1	15-region_60	4	GABPB1	15	50569389	50647605
Epithelial.Epithelial.1.1.1.1	15-region_60	4	USP8	15	50716577	50793280
Epithelial.Epithelial.1.1.1.1	15-region_60	4	TRPM7	15	50844670	50979012
Epithelial.Epithelial.1.1.1.1	15-region_60	4	SPPL2A	15	50999506	51058005
Epithelial.Epithelial.1.1.1.1	15-region_60	4	LYSMD2	15	52015208	52043782
Epithelial.Epithelial.1.1.1.1	15-region_60	4	TMOD3	15	52121825	52239492
Epithelial.Epithelial.1.1.1.1	15-region_60	4	LEO1	15	52230222	52264003
Epithelial.Epithelial.1.1.1.1	15-region_60	4	MAPK6	15	52244303	52358462
Epithelial.Epithelial.1.1.1.1	15-region_60	4	GNB5	15	52413117	52483566
Epithelial.Epithelial.1.1.1.1	15-region_60	4	MYO5C	15	52484519	52587995
Epithelial.Epithelial.1.1.1.1	15-region_60	4	ARPP19	15	52839242	52862080
Epithelial.Epithelial.1.1.1.1	15-region_60	4	FAM214A	15	52873514	53002014
Epithelial.Epithelial.1.1.1.1	15-region_60	4	WDR72	15	53805938	54055075
Epithelial.Epithelial.1.1.1.1	15-region_60	4	RSL24D1	15	55473004	55489265
Epithelial.Epithelial.1.1.1.1	15-region_60	4	RAB27A	15	55495164	55611311
Epithelial.Epithelial.1.1.1.1	15-region_60	4	RP11-139H15.1	15	55609382	55611359
Epithelial.Epithelial.1.1.1.1	15-region_60	4	CCPG1	15	55632230	55700708
Epithelial.Epithelial.1.1.1.1	15-region_60	4	MNS1	15	56713742	56757335
Epithelial.Epithelial.1.1.1.1	15-region_60	4	ZNF280D	15	56922379	57210769
Epithelial.Epithelial.1.1.1.1	15-region_60	4	TCF12	15	57210821	57591479
Epithelial.Epithelial.1.1.1.1	15-region_60	4	POLR2M	15	57884231	58074960
Epithelial.Epithelial.1.1.1.1	15-region_60	4	ADAM10	15	58887403	59042177
Epithelial.Epithelial.1.1.1.1	15-region_60	4	FAM63B	15	59063391	59154099
Epithelial.Epithelial.1.1.1.1	15-region_60	4	RNF111	15	59157374	59389618
Epithelial.Epithelial.1.1.1.1	15-region_60	4	SLTM	15	59171244	59225852
Epithelial.Epithelial.1.1.1.1	15-region_60	4	CCNB2	15	59397277	59417244
Epithelial.Epithelial.1.1.1.1	15-region_60	4	MYO1E	15	59427113	59665099
Epithelial.Epithelial.1.1.1.1	15-region_60	4	GCNT3	15	59887074	59932438
Epithelial.Epithelial.1.1.1.1	15-region_60	4	GTF2A2	15	59930261	59949740
Epithelial.Epithelial.1.1.1.1	15-region_60	4	BNIP2	15	59951345	59981733
Epithelial.Epithelial.1.1.1.1	15-region_60	4	ANXA2	15	60639333	60695082
Epithelial.Epithelial.1.1.1.1	15-region_60	4	NARG2	15	60711808	60771359
Epithelial.Epithelial.1.1.1.1	15-region_60	4	RORA	15	60780483	61521518
Epithelial.Epithelial.1.1.1.1	15-region_60	4	VPS13C	15	62144588	62352672
Epithelial.Epithelial.1.1.1.1	15-region_60	4	TPM1	15	63334831	63364114
Epithelial.Epithelial.1.1.1.1	15-region_60	4	LACTB	15	63413999	63434260
Epithelial.Epithelial.1.1.1.1	15-region_60	4	RPS27L	15	63418071	63450220
Epithelial.Epithelial.1.1.1.1	15-region_60	4	RAB8B	15	63481668	63559981
Epithelial.Epithelial.1.1.1.1	15-region_60	4	APH1B	15	63568217	63601325
Epithelial.Epithelial.1.1.1.1	15-region_60	4	CA12	15	63613577	63674360
Epithelial.Epithelial.1.1.1.1	15-region_60	4	USP3	15	63796793	63886839
Epithelial.Epithelial.1.1.1.1	15-region_60	4	HERC1	15	63900817	64126141
Epithelial.Epithelial.1.1.1.1	15-region_60	4	FAM96A	15	64364758	64386217
Epithelial.Epithelial.1.1.1.1	15-region_60	4	SNX1	15	64386322	64438289
Epithelial.Epithelial.1.1.1.1	15-region_60	4	PPIB	15	64448011	64455404
Epithelial.Epithelial.1.1.1.1	15-region_60	4	CSNK1G1	15	64457716	64648442
Epithelial.Epithelial.1.1.1.1	15-region_60	4	KIAA0101	15	64657193	64679886
Epithelial.Epithelial.1.1.1.1	15-region_60	4	TRIP4	15	64679947	64747502
Epithelial.Epithelial.1.1.1.1	15-region_60	4	ZNF609	15	64752941	64978264
Epithelial.Epithelial.1.1.1.1	15-region_60	4	OAZ2	15	64979772	64995480
Epithelial.Epithelial.1.1.1.1	15-region_60	4	SPG21	15	65255362	65282648
Epithelial.Epithelial.1.1.1.1	15-region_60	4	PDCD7	15	65409717	65426174
Epithelial.Epithelial.1.1.1.1	15-region_60	4	CLPX	15	65440557	65477680
Epithelial.Epithelial.1.1.1.1	15-region_60	4	DPP8	15	65734801	65810042
Epithelial.Epithelial.1.1.1.1	16-region_63	2	BANP	16	87982850	88110924
Epithelial.Epithelial.1.1.1.1	16-region_63	2	ZC3H18	16	88636789	88698374
Epithelial.Epithelial.1.1.1.1	16-region_63	2	CYBA	16	88709691	88717560
Epithelial.Epithelial.1.1.1.1	16-region_63	2	MVD	16	88718343	88729569
Epithelial.Epithelial.1.1.1.1	16-region_63	2	PIEZO1	16	88781751	88851619
Epithelial.Epithelial.1.1.1.1	16-region_63	2	APRT	16	88875747	88878352
Epithelial.Epithelial.1.1.1.1	16-region_63	2	TRAPPC2L	16	88922628	88929094
Epithelial.Epithelial.1.1.1.1	16-region_63	2	ACSF3	16	89154783	89222254
Epithelial.Epithelial.1.1.1.1	16-region_63	2	ANKRD11	16	89334038	89556969
Epithelial.Epithelial.1.1.1.1	16-region_63	2	SPG7	16	89557325	89624176
Epithelial.Epithelial.1.1.1.1	16-region_63	2	RPL13	16	89627065	89630950
Epithelial.Epithelial.1.1.1.1	16-region_63	2	CHMP1A	16	89710839	89724253
Epithelial.Epithelial.1.1.1.1	16-region_63	2	SPATA33	16	89724210	89737680
Epithelial.Epithelial.1.1.1.1	16-region_63	2	CDK10	16	89747145	89762772
Epithelial.Epithelial.1.1.1.1	16-region_63	2	SPATA2L	16	89762751	89768113
Epithelial.Epithelial.1.1.1.1	16-region_63	2	VPS9D1	16	89773542	89787394
Epithelial.Epithelial.1.1.1.1	16-region_63	2	ZNF276	16	89786808	89807311
Epithelial.Epithelial.1.1.1.1	16-region_63	2	SPIRE2	16	89884587	89937727
Epithelial.Epithelial.1.1.1.1	16-region_63	2	TCF25	16	89940000	89977792
Epithelial.Epithelial.1.1.1.1	16-region_63	2	DEF8	16	90014333	90034468
Epithelial.Epithelial.1.1.1.1	16-region_63	2	DBNDD1	16	90071273	90086536
Epithelial.Epithelial.1.1.1.1	16-region_63	2	GAS8	16	90086037	90111383
Epithelial.Epithelial.1.1.1.1	17-region_65	4	NR1D1	17	38249040	38256978
Epithelial.Epithelial.1.1.1.1	17-region_65	4	MSL1	17	38278551	38293042
Epithelial.Epithelial.1.1.1.1	17-region_65	4	CASC3	17	38296571	38328436
Epithelial.Epithelial.1.1.1.1	17-region_65	4	RAPGEFL1	17	38333263	38351908
Epithelial.Epithelial.1.1.1.1	17-region_65	4	WIPF2	17	38375556	38440388
Epithelial.Epithelial.1.1.1.1	17-region_65	4	RARA	17	38465444	38513094
Epithelial.Epithelial.1.1.1.1	17-region_65	4	TOP2A	17	38544768	38574202
Epithelial.Epithelial.1.1.1.1	17-region_65	4	IGFBP4	17	38599702	38613983
Epithelial.Epithelial.1.1.1.1	17-region_65	4	TNS4	17	38632080	38657849
Epithelial.Epithelial.1.1.1.1	17-region_65	4	SMARCE1	17	38781214	38804760
Epithelial.Epithelial.1.1.1.1	17-region_65	4	KRT10	17	38974369	38978847
Epithelial.Epithelial.1.1.1.1	17-region_65	4	TMEM99	17	38975358	38992522
Epithelial.Epithelial.1.1.1.1	17-region_65	4	KRT23	17	39078948	39093886
Epithelial.Epithelial.1.1.1.1	17-region_65	4	KRT15	17	39669995	39678781
Epithelial.Epithelial.1.1.1.1	17-region_65	4	KRT19	17	39679869	39684560
Epithelial.Epithelial.1.1.1.1	17-region_65	4	KRT16	17	39766030	39772151
Epithelial.Epithelial.1.1.1.1	17-region_65	4	KRT17	17	39775689	39781094
Epithelial.Epithelial.1.1.1.1	17-region_65	4	JUP	17	39775692	39943183
Epithelial.Epithelial.1.1.1.1	17-region_65	4	EIF1	17	39845137	39848920
Epithelial.Epithelial.1.1.1.1	17-region_65	4	FKBP10	17	39968932	39979465
Epithelial.Epithelial.1.1.1.1	17-region_65	4	NT5C3B	17	39981335	39992523
Epithelial.Epithelial.1.1.1.1	17-region_65	4	ACLY	17	40023161	40086795
Epithelial.Epithelial.1.1.1.1	17-region_65	4	CNP	17	40118759	40129749
Epithelial.Epithelial.1.1.1.1	17-region_65	4	DNAJC7	17	40128451	40173394
Epithelial.Epithelial.1.1.1.1	17-region_65	4	NKIRAS2	17	40163400	40177659
Epithelial.Epithelial.1.1.1.1	17-region_65	4	KAT2A	17	40265126	40273376
Epithelial.Epithelial.1.1.1.1	17-region_65	4	RAB5C	17	40276994	40307035
Epithelial.Epithelial.1.1.1.1	17-region_65	4	GHDC	17	40340817	40346531
Epithelial.Epithelial.1.1.1.1	17-region_65	4	STAT3	17	40465342	40540586
Epithelial.Epithelial.1.1.1.1	17-region_65	4	PTRF	17	40554470	40575535
Epithelial.Epithelial.1.1.1.1	17-region_65	4	ATP6V0A1	17	40610862	40674629
Epithelial.Epithelial.1.1.1.1	17-region_65	4	COASY	17	40713485	40718295
Epithelial.Epithelial.1.1.1.1	17-region_65	4	MLX	17	40719086	40725257
Epithelial.Epithelial.1.1.1.1	17-region_65	4	FAM134C	17	40731531	40762641
Epithelial.Epithelial.1.1.1.1	17-region_65	4	TUBG1	17	40761694	40767252
Epithelial.Epithelial.1.1.1.1	17-region_65	4	VPS25	17	40925454	40931617
Epithelial.Epithelial.1.1.1.1	17-region_65	4	COA3	17	40947165	40950722
Epithelial.Epithelial.1.1.1.1	17-region_65	4	BECN1	17	40962152	40985367
Epithelial.Epithelial.1.1.1.1	17-region_65	4	PSME3	17	40976402	40995774
Epithelial.Epithelial.1.1.1.1	17-region_65	4	RUNDC1	17	41132582	41145707
Epithelial.Epithelial.1.1.1.1	17-region_65	4	RPL27	17	41150290	41154976
Epithelial.Epithelial.1.1.1.1	17-region_65	4	IFI35	17	41158742	41166473
Epithelial.Epithelial.1.1.1.1	17-region_67	4	HOXB3	17	46626232	46682274
Epithelial.Epithelial.1.1.1.1	17-region_67	4	HOXB6	17	46671639	46682354
Epithelial.Epithelial.1.1.1.1	17-region_67	4	HOXB7	17	46684594	46710934
Epithelial.Epithelial.1.1.1.1	17-region_67	4	CALCOCO2	17	46908350	46943884
Epithelial.Epithelial.1.1.1.1	17-region_67	4	ATP5G1	17	46970127	46973233
Epithelial.Epithelial.1.1.1.1	17-region_67	4	UBE2Z	17	46985731	47006418
Epithelial.Epithelial.1.1.1.1	17-region_67	4	SNF8	17	47006678	47022479
Epithelial.Epithelial.1.1.1.1	17-region_67	4	ZNF652	17	47366568	47439835
Epithelial.Epithelial.1.1.1.1	17-region_67	4	PHB	17	47481414	47492246
Epithelial.Epithelial.1.1.1.1	17-region_67	4	SPOP	17	47676246	47755596
Epithelial.Epithelial.1.1.1.1	17-region_67	4	SLC35B1	17	47778305	47786376
Epithelial.Epithelial.1.1.1.1	17-region_67	4	KAT7	17	47865917	47906458
Epithelial.Epithelial.1.1.1.1	17-region_67	4	ITGA3	17	48133332	48167845
Epithelial.Epithelial.1.1.1.1	17-region_67	4	PDK2	17	48172101	48189516
Epithelial.Epithelial.1.1.1.1	17-region_67	4	PPP1R9B	17	48211104	48227991
Epithelial.Epithelial.1.1.1.1	17-region_67	4	COL1A1	17	48260650	48278993
Epithelial.Epithelial.1.1.1.1	17-region_67	4	TMEM92	17	48348767	48358844
Epithelial.Epithelial.1.1.1.1	17-region_67	4	MRPL27	17	48445218	48450575
Epithelial.Epithelial.1.1.1.1	17-region_67	4	LRRC59	17	48452420	48474914
Epithelial.Epithelial.1.1.1.1	17-region_67	4	EPN3	17	48609904	48621111
Epithelial.Epithelial.1.1.1.1	17-region_67	4	SPATA20	17	48620419	48633213
Epithelial.Epithelial.1.1.1.1	17-region_67	4	ABCC3	17	48712138	48769613
Epithelial.Epithelial.1.1.1.1	17-region_67	4	ANKRD40	17	48770551	48785285
Epithelial.Epithelial.1.1.1.1	17-region_67	4	LUC7L3	17	48796905	48833574
Epithelial.Epithelial.1.1.1.1	17-region_67	4	TOB1	17	48939584	48945339
Epithelial.Epithelial.1.1.1.1	17-region_67	4	SPAG9	17	49039535	49198226
Epithelial.Epithelial.1.1.1.1	17-region_67	4	NME1	17	49230897	49239789
Epithelial.Epithelial.1.1.1.1	17-region_67	4	NME1-NME2	17	49230920	49249108
Epithelial.Epithelial.1.1.1.1	17-region_67	4	NME2	17	49230951	49249105
Epithelial.Epithelial.1.1.1.1	17-region_67	4	UTP18	17	49337889	49375297
Epithelial.Epithelial.1.1.1.1	17-region_67	4	TOM1L1	17	52976748	53039310
Epithelial.Epithelial.1.1.1.1	17-region_67	4	COX11	17	53029263	53046146
Epithelial.Epithelial.1.1.1.1	17-region_67	4	TRIM25	17	54965270	54991399
Epithelial.Epithelial.1.1.1.1	20-region_71	4	SMOX	20	4101627	4168394
Epithelial.Epithelial.1.1.1.1	20-region_71	4	PRNP	20	4666882	4682236
Epithelial.Epithelial.1.1.1.1	20-region_71	4	TMEM230	20	5080486	5093749
Epithelial.Epithelial.1.1.1.1	20-region_71	4	PCNA	20	5095599	5107272
Epithelial.Epithelial.1.1.1.1	20-region_71	4	CDS2	20	5107432	5178533
Epithelial.Epithelial.1.1.1.1	20-region_71	4	GPCPD1	20	5525085	5591672
Epithelial.Epithelial.1.1.1.1	20-region_71	4	TRMT6	20	5917881	5931182
Epithelial.Epithelial.1.1.1.1	20-region_71	4	CRLS1	20	5986736	6020699
Epithelial.Epithelial.1.1.1.1	20-region_71	4	FERMT1	20	6055492	6104191
Epithelial.Epithelial.1.1.1.1	20-region_71	4	BMP2	20	6748311	6760927
Epithelial.Epithelial.1.1.1.1	20-region_71	4	TMX4	20	7957995	8000476
Epithelial.Epithelial.1.1.1.1	20-region_71	4	PLCB1	20	8112824	8949003
Epithelial.Epithelial.1.1.1.1	20-region_71	4	MKKS	20	10381657	10414870
Epithelial.Epithelial.1.1.1.1	20-region_71	4	JAG1	20	10618332	10654694
[truncated: 42,151 more rows]

## Sheet: Table S7
Table S7 The CNV changed genes were shared by all subclonal cell populations of LM samples
cell_group_name	gene_region_name	state	gene	chr	start	end
Epithelial.Epithelial.1.1.1.1	1-region_1	5	NOC2L	1	879584	894689
Epithelial.Epithelial.1.1.1.1	1-region_1	5	PLEKHN1	1	901877	911245
Epithelial.Epithelial.1.1.1.1	1-region_1	5	HES4	1	934342	935552
Epithelial.Epithelial.1.1.1.1	1-region_1	5	ISG15	1	948803	949920
Epithelial.Epithelial.1.1.1.1	1-region_1	5	AGRN	1	955503	991496
Epithelial.Epithelial.1.1.1.1	1-region_1	5	TNFRSF18	1	1138888	1142071
Epithelial.Epithelial.1.1.1.1	1-region_1	5	SDF4	1	1152288	1167411
Epithelial.Epithelial.1.1.1.1	1-region_1	5	B3GALT6	1	1167629	1170421
Epithelial.Epithelial.1.1.1.1	1-region_1	5	UBE2J2	1	1189289	1209265
Epithelial.Epithelial.1.1.1.1	1-region_1	5	ACAP3	1	1227756	1244989
Epithelial.Epithelial.1.1.1.1	1-region_1	5	PUSL1	1	1243947	1247057
Epithelial.Epithelial.1.1.1.1	1-region_1	5	CPSF3L	1	1246965	1260071
Epithelial.Epithelial.1.1.1.1	1-region_1	5	DVL1	1	1270656	1284730
Epithelial.Epithelial.1.1.1.1	1-region_1	5	MXRA8	1	1288069	1297157
Epithelial.Epithelial.1.1.1.1	1-region_1	5	AURKAIP1	1	1309110	1310875
Epithelial.Epithelial.1.1.1.1	1-region_1	5	CCNL2	1	1321091	1334708
Epithelial.Epithelial.1.1.1.1	1-region_1	5	MRPL20	1	1337288	1342693
Epithelial.Epithelial.1.1.1.1	1-region_1	5	ANKRD65	1	1353800	1357149
Epithelial.Epithelial.1.1.1.1	1-region_1	5	VWA1	1	1370241	1378262
Epithelial.Epithelial.1.1.1.1	1-region_1	5	ATAD3B	1	1407143	1433228
Epithelial.Epithelial.1.1.1.1	1-region_1	5	ATAD3A	1	1447531	1470067
Epithelial.Epithelial.1.1.1.1	1-region_1	5	SSU72	1	1477053	1510249
Epithelial.Epithelial.1.1.1.1	1-region_2	4	MIB2	1	1550795	1565990
Epithelial.Epithelial.1.1.1.1	1-region_2	4	MMP23B	1	1567474	1570639
Epithelial.Epithelial.1.1.1.1	1-region_2	4	CDK11B	1	1570603	1590473
Epithelial.Epithelial.1.1.1.1	1-region_2	4	SLC35E2B	1	1592939	1624167
Epithelial.Epithelial.1.1.1.1	1-region_2	4	CDK11A	1	1634169	1655766
Epithelial.Epithelial.1.1.1.1	1-region_2	4	NADK	1	1682671	1711896
Epithelial.Epithelial.1.1.1.1	1-region_2	4	GNB1	1	1716729	1822495
Epithelial.Epithelial.1.1.1.1	1-region_2	4	PRKCZ	1	1981909	2116834
Epithelial.Epithelial.1.1.1.1	1-region_2	4	C1orf86	1	2115903	2144159
Epithelial.Epithelial.1.1.1.1	1-region_2	4	SKI	1	2160134	2241558
Epithelial.Epithelial.1.1.1.1	1-region_2	4	RER1	1	2323267	2336883
Epithelial.Epithelial.1.1.1.1	1-region_2	4	PEX10	1	2336236	2345236
Epithelial.Epithelial.1.1.1.1	1-region_2	4	TNFRSF14	1	2487078	2496821
Epithelial.Epithelial.1.1.1.1	1-region_2	4	FAM213B	1	2517930	2522908
Epithelial.Epithelial.1.1.1.1	1-region_2	4	MMEL1	1	2522078	2564481
Epithelial.Epithelial.1.1.1.1	1-region_2	4	ARHGEF16	1	3370990	3397677
Epithelial.Epithelial.1.1.1.1	1-region_2	4	MEGF6	1	3406484	3528059
Epithelial.Epithelial.1.1.1.1	1-region_2	4	TPRG1L	1	3541566	3546691
Epithelial.Epithelial.1.1.1.1	1-region_2	4	WRAP73	1	3547331	3569325
Epithelial.Epithelial.1.1.1.1	1-region_2	4	SMIM1	1	3689352	3692546
Epithelial.Epithelial.1.1.1.1	1-region_2	4	LRRC47	1	3696784	3713068
Epithelial.Epithelial.1.1.1.1	1-region_2	4	CEP104	1	3728645	3773778
Epithelial.Epithelial.1.1.1.1	1-region_2	4	C1orf174	1	3805689	3816857
Epithelial.Epithelial.1.1.1.1	1-region_2	4	RPL22	1	6241329	6269449
Epithelial.Epithelial.1.1.1.1	1-region_2	4	ICMT	1	6281253	6296032
Epithelial.Epithelial.1.1.1.1	1-region_2	4	GPR153	1	6307406	6321035
Epithelial.Epithelial.1.1.1.1	1-region_2	4	ACOT7	1	6324329	6454451
Epithelial.Epithelial.1.1.1.1	1-region_4	2	PNRC2	1	24285599	24289952
Epithelial.Epithelial.1.1.1.1	1-region_4	2	SRSF10	1	24291294	24307417
Epithelial.Epithelial.1.1.1.1	1-region_4	2	IL22RA1	1	24446261	24469611
Epithelial.Epithelial.1.1.1.1	1-region_4	2	STPG1	1	24683489	24743424
Epithelial.Epithelial.1.1.1.1	1-region_4	2	NIPAL3	1	24742284	24799466
Epithelial.Epithelial.1.1.1.1	1-region_4	2	RCAN3	1	24829387	24867530
Epithelial.Epithelial.1.1.1.1	1-region_4	2	SRRM1	1	24958207	24999758
Epithelial.Epithelial.1.1.1.1	1-region_4	2	CLIC4	1	25071848	25170815
Epithelial.Epithelial.1.1.1.1	1-region_4	2	RUNX3	1	25226002	25291612
Epithelial.Epithelial.1.1.1.1	1-region_4	2	SYF2	1	25549170	25558993
Epithelial.Epithelial.1.1.1.1	1-region_4	2	C1orf63	1	25568728	25664704
Epithelial.Epithelial.1.1.1.1	1-region_4	2	TMEM50A	1	25664408	25688852
Epithelial.Epithelial.1.1.1.1	1-region_4	2	TMEM57	1	25757388	25826700
Epithelial.Epithelial.1.1.1.1	1-region_4	2	LDLRAP1	1	25870071	25895377
Epithelial.Epithelial.1.1.1.1	1-region_4	2	SEPN1	1	26126667	26144713
Epithelial.Epithelial.1.1.1.1	1-region_4	2	MTFR1L	1	26145131	26159432
Epithelial.Epithelial.1.1.1.1	1-region_4	2	STMN1	1	26210672	26233482
Epithelial.Epithelial.1.1.1.1	1-region_4	2	ZNF593	1	26496362	26498551
Epithelial.Epithelial.1.1.1.1	1-region_4	2	CNKSR1	1	26503894	26516377
Epithelial.Epithelial.1.1.1.1	1-region_4	2	SH3BGRL3	1	26605667	26608007
Epithelial.Epithelial.1.1.1.1	1-region_4	2	UBXN11	1	26607819	26644854
Epithelial.Epithelial.1.1.1.1	1-region_4	2	CD52	1	26644448	26647014
Epithelial.Epithelial.1.1.1.1	1-region_4	2	DHDDS	1	26758773	26797785
Epithelial.Epithelial.1.1.1.1	1-region_4	2	HMGN2	1	26798941	26802463
Epithelial.Epithelial.1.1.1.1	1-region_4	2	RPS6KA1	1	26856252	26901521
Epithelial.Epithelial.1.1.1.1	1-region_4	2	ARID1A	1	27022524	27108595
Epithelial.Epithelial.1.1.1.1	1-region_4	2	SFN	1	27189633	27190947
Epithelial.Epithelial.1.1.1.1	1-region_4	2	GPN2	1	27202624	27216788
Epithelial.Epithelial.1.1.1.1	1-region_4	2	NUDC	1	27226729	27273353
Epithelial.Epithelial.1.1.1.1	1-region_4	2	NR0B2	1	27237980	27240457
Epithelial.Epithelial.1.1.1.1	1-region_4	2	TRNP1	1	27320198	27327389
Epithelial.Epithelial.1.1.1.1	1-region_4	2	SLC9A1	1	27425306	27493472
Epithelial.Epithelial.1.1.1.1	1-region_4	2	WDTC1	1	27561007	27635110
Epithelial.Epithelial.1.1.1.1	1-region_4	2	TMEM222	1	27648651	27662891
Epithelial.Epithelial.1.1.1.1	1-region_4	2	SYTL1	1	27668513	27680421
Epithelial.Epithelial.1.1.1.1	1-region_4	2	WASF2	1	27730730	27816669
Epithelial.Epithelial.1.1.1.1	1-region_4	2	AHDC1	1	27860546	27930942
Epithelial.Epithelial.1.1.1.1	1-region_4	2	IFI6	1	27992572	27998729
Epithelial.Epithelial.1.1.1.1	1-region_4	2	STX12	1	28099694	28150963
Epithelial.Epithelial.1.1.1.1	1-region_4	2	PPP1R8	1	28157289	28178187
Epithelial.Epithelial.1.1.1.1	1-region_4	2	RPA2	1	28218035	28241257
Epithelial.Epithelial.1.1.1.1	1-region_4	2	PTAFR	1	28473677	28520447
Epithelial.Epithelial.1.1.1.1	1-region_4	2	DNAJC8	1	28525967	28559536
Epithelial.Epithelial.1.1.1.1	1-region_4	2	ATPIF1	1	28562620	28573417
Epithelial.Epithelial.1.1.1.1	1-region_4	2	SESN2	1	28586038	28609002
Epithelial.Epithelial.1.1.1.1	1-region_4	2	PHACTR4	1	28696114	28826881
Epithelial.Epithelial.1.1.1.1	1-region_4	2	RCC1	1	28832455	28865812
Epithelial.Epithelial.1.1.1.1	1-region_6	4	SF3A3	1	38422647	38456593
Epithelial.Epithelial.1.1.1.1	1-region_6	4	FHL3	1	38462442	38471278
Epithelial.Epithelial.1.1.1.1	1-region_6	4	UTP11L	1	38474930	38490496
Epithelial.Epithelial.1.1.1.1	1-region_6	4	RRAGC	1	39303870	39325495
Epithelial.Epithelial.1.1.1.1	1-region_6	4	MYCBP	1	39328636	39347289
Epithelial.Epithelial.1.1.1.1	1-region_6	4	RHBDL2	1	39351479	39407471
Epithelial.Epithelial.1.1.1.1	1-region_6	4	AKIRIN1	1	39456895	39471731
Epithelial.Epithelial.1.1.1.1	1-region_6	4	NDUFS5	1	39491990	39500308
Epithelial.Epithelial.1.1.1.1	1-region_6	4	MACF1	1	39546988	39952849
Epithelial.Epithelial.1.1.1.1	1-region_6	4	PABPC4	1	40026488	40042462
Epithelial.Epithelial.1.1.1.1	1-region_6	4	PPIE	1	40157854	40229586
Epithelial.Epithelial.1.1.1.1	1-region_6	4	MFSD2A	1	40420802	40435638
Epithelial.Epithelial.1.1.1.1	1-region_6	4	CAP1	1	40505905	40538321
Epithelial.Epithelial.1.1.1.1	1-region_6	4	PPT1	1	40538379	40563375
Epithelial.Epithelial.1.1.1.1	1-region_6	4	RLF	1	40627045	40706593
Epithelial.Epithelial.1.1.1.1	1-region_6	4	ZMPSTE24	1	40723779	40759856
Epithelial.Epithelial.1.1.1.1	1-region_6	4	SMAP2	1	40810522	40888998
Epithelial.Epithelial.1.1.1.1	1-region_6	4	NFYC	1	41157320	41237275
Epithelial.Epithelial.1.1.1.1	1-region_6	4	CITED4	1	41326729	41328018
Epithelial.Epithelial.1.1.1.1	1-region_6	4	CTPS1	1	41445007	41478235
Epithelial.Epithelial.1.1.1.1	1-region_6	4	SCMH1	1	41492872	41707826
Epithelial.Epithelial.1.1.1.1	1-region_6	4	HIVEP3	1	41972036	42501596
Epithelial.Epithelial.1.1.1.1	1-region_6	4	FOXJ3	1	42642210	42801548
Epithelial.Epithelial.1.1.1.1	1-region_6	4	PPCS	1	42921788	42939056
Epithelial.Epithelial.1.1.1.1	1-region_6	4	PPIH	1	43124096	43142429
Epithelial.Epithelial.1.1.1.1	1-region_6	4	YBX1	1	43148098	43168020
Epithelial.Epithelial.1.1.1.1	1-region_6	4	C1orf50	1	43232940	43263968
Epithelial.Epithelial.1.1.1.1	1-region_6	4	CCDC23	1	43272723	43282954
Epithelial.Epithelial.1.1.1.1	1-region_6	4	SLC2A1	1	43391052	43424530
Epithelial.Epithelial.1.1.1.1	1-region_6	4	EBNA1BP2	1	43629846	43736607
Epithelial.Epithelial.1.1.1.1	1-region_6	4	TMEM125	1	43735665	43739673
Epithelial.Epithelial.1.1.1.1	1-region_6	4	C1orf210	1	43747554	43751288
Epithelial.Epithelial.1.1.1.1	1-region_6	4	CDC20	1	43824626	43828874
Epithelial.Epithelial.1.1.1.1	1-region_6	4	ELOVL1	1	43829068	43833696
Epithelial.Epithelial.1.1.1.1	1-region_6	4	MED8	1	43849588	43855479
Epithelial.Epithelial.1.1.1.1	1-region_6	4	SZT2	1	43855553	43918321
Epithelial.Epithelial.1.1.1.1	1-region_6	4	HYI	1	43916824	43919660
Epithelial.Epithelial.1.1.1.1	1-region_6	4	PTPRF	1	43990858	44089343
Epithelial.Epithelial.1.1.1.1	1-region_6	4	KDM4A	1	44115829	44171186
Epithelial.Epithelial.1.1.1.1	1-region_6	4	DPH2	1	44435672	44439041
Epithelial.Epithelial.1.1.1.1	1-region_6	4	ATP6V0B	1	44440159	44443967
Epithelial.Epithelial.1.1.1.1	1-region_6	4	B4GALT2	1	44444615	44456840
Epithelial.Epithelial.1.1.1.1	1-region_6	4	CCDC24	1	44457031	44462200
Epithelial.Epithelial.1.1.1.1	1-region_6	4	DMAP1	1	44679127	44686353
Epithelial.Epithelial.1.1.1.1	1-region_6	4	ERI3	1	44686742	44820932
Epithelial.Epithelial.1.1.1.1	1-region_6	4	RNF220	1	44870866	45117396
Epithelial.Epithelial.1.1.1.1	1-region_6	4	TMEM53	1	45100910	45140227
Epithelial.Epithelial.1.1.1.1	1-region_6	4	RPS8	1	45240923	45244451
Epithelial.Epithelial.1.1.1.1	1-region_6	4	PLK3	1	45265897	45271662
Epithelial.Epithelial.1.1.1.1	1-region_6	4	EIF2B3	1	45316450	45452282
Epithelial.Epithelial.1.1.1.1	1-region_6	4	HECTD3	1	45468212	45477001
Epithelial.Epithelial.1.1.1.1	1-region_6	4	UROD	1	45477819	45481247
Epithelial.Epithelial.1.1.1.1	1-region_6	4	PRDX1	1	45976708	45988719
Epithelial.Epithelial.1.1.1.1	1-region_6	4	AKR1A1	1	46016215	46035721
Epithelial.Epithelial.1.1.1.1	1-region_6	4	NASP	1	46049518	46084566
Epithelial.Epithelial.1.1.1.1	1-region_6	4	GPBP1L1	1	46092976	46153785
Epithelial.Epithelial.1.1.1.1	1-region_6	4	TMEM69	1	46152886	46160115
Epithelial.Epithelial.1.1.1.1	1-region_6	4	IPP	1	46159996	46216322
Epithelial.Epithelial.1.1.1.1	1-region_6	4	MAST2	1	46252659	46501796
Epithelial.Epithelial.1.1.1.1	1-region_6	4	TSPAN1	1	46640745	46651630
Epithelial.Epithelial.1.1.1.1	1-region_6	4	POMGNT1	1	46654354	46685977
Epithelial.Epithelial.1.1.1.1	1-region_6	4	LRRC41	1	46726868	46769280
Epithelial.Epithelial.1.1.1.1	1-region_6	4	UQCRH	1	46769303	46782448
Epithelial.Epithelial.1.1.1.1	1-region_6	4	NSUN4	1	46805849	46830824
Epithelial.Epithelial.1.1.1.1	1-region_6	4	FAAH	1	46859937	46879520
Epithelial.Epithelial.1.1.1.1	1-region_6	4	MKNK1	1	47023090	47082515
Epithelial.Epithelial.1.1.1.1	1-region_6	4	ATPAF1	1	47098409	47139539
Epithelial.Epithelial.1.1.1.1	1-region_6	4	EFCAB14	1	47124366	47184824
Epithelial.Epithelial.1.1.1.1	1-region_6	4	PDZK1IP1	1	47649265	47656716
Epithelial.Epithelial.1.1.1.1	1-region_6	4	CMPK1	1	47799469	47844511
Epithelial.Epithelial.1.1.1.1	1-region_6	4	FAF1	1	50905150	51425935
Epithelial.Epithelial.1.1.1.1	1-region_6	4	CDKN2C	1	51426417	51440305
Epithelial.Epithelial.1.1.1.1	1-region_6	4	RNF11	1	51701943	51739127
Epithelial.Epithelial.1.1.1.1	1-region_6	4	TTC39A	1	51752930	51810788
Epithelial.Epithelial.1.1.1.1	1-region_6	4	EPS15	1	51819935	51985000
Epithelial.Epithelial.1.1.1.1	1-region_6	4	OSBPL9	1	52042851	52254889
Epithelial.Epithelial.1.1.1.1	1-region_6	4	NRD1	1	52254863	52344477
Epithelial.Epithelial.1.1.1.1	1-region_6	4	RAB3B	1	52373628	52456436
Epithelial.Epithelial.1.1.1.1	1-region_6	4	TXNDC12	1	52485803	52521843
Epithelial.Epithelial.1.1.1.1	1-region_6	4	BTF3L4	1	52521797	52556388
Epithelial.Epithelial.1.1.1.1	1-region_6	4	PRPF38A	1	52870236	52886511
Epithelial.Epithelial.1.1.1.1	1-region_6	4	ZCCHC11	1	52873954	53019159
Epithelial.Epithelial.1.1.1.1	1-region_6	4	GPX7	1	53068044	53074723
Epithelial.Epithelial.1.1.1.1	1-region_6	4	ZYG11B	1	53192126	53293014
Epithelial.Epithelial.1.1.1.1	1-region_6	4	ECHDC2	1	53361656	53392884
Epithelial.Epithelial.1.1.1.1	1-region_6	4	SCP2	1	53392901	53517375
Epithelial.Epithelial.1.1.1.1	1-region_6	4	CPT2	1	53662101	53679869
Epithelial.Epithelial.1.1.1.1	1-region_6	4	C1orf123	1	53679771	53686289
Epithelial.Epithelial.1.1.1.1	1-region_6	4	MAGOH	1	53692564	53704282
Epithelial.Epithelial.1.1.1.1	1-region_6	4	LRP8	1	53711217	53793742
Epithelial.Epithelial.1.1.1.1	1-region_6	4	NDC1	1	54231133	54304533
Epithelial.Epithelial.1.1.1.1	1-region_6	4	YIPF1	1	54317392	54356407
Epithelial.Epithelial.1.1.1.1	1-region_6	4	HSPB11	1	54382247	54411602
Epithelial.Epithelial.1.1.1.1	1-region_6	4	LRRC42	1	54411750	54433841
Epithelial.Epithelial.1.1.1.1	1-region_6	4	TMEM59	1	54497347	54519177
Epithelial.Epithelial.1.1.1.1	1-region_6	4	MRPL37	1	54649714	54691137
Epithelial.Epithelial.1.1.1.1	1-region_6	4	SSBP3	1	54691105	54879152
Epithelial.Epithelial.1.1.1.1	1-region_6	4	ACOT11	1	55007930	55104865
Epithelial.Epithelial.1.1.1.1	1-region_6	4	TTC22	1	55245385	55266940
Epithelial.Epithelial.1.1.1.1	1-region_6	4	DHCR24	1	55315306	55352891
Epithelial.Epithelial.1.1.1.1	1-region_6	4	USP24	1	55532032	55680786
Epithelial.Epithelial.1.1.1.1	1-region_8	2	TMEM167B	1	109632425	109639556
Epithelial.Epithelial.1.1.1.1	1-region_8	2	SARS	1	109756540	109780791
Epithelial.Epithelial.1.1.1.1	1-region_8	2	SORT1	1	109852192	109940573
Epithelial.Epithelial.1.1.1.1	1-region_8	2	PSMA5	1	109941653	109969062
Epithelial.Epithelial.1.1.1.1	1-region_8	2	GNAI3	1	110091233	110136975
Epithelial.Epithelial.1.1.1.1	1-region_8	2	AMPD2	1	110158726	110174673
Epithelial.Epithelial.1.1.1.1	1-region_8	2	GSTM4	1	110198703	110208118
Epithelial.Epithelial.1.1.1.1	1-region_8	2	GSTM3	1	110276554	110284384
Epithelial.Epithelial.1.1.1.1	1-region_8	2	EPS8L3	1	110292702	110306649
Epithelial.Epithelial.1.1.1.1	1-region_8	2	AHCYL1	1	110527308	110566357
Epithelial.Epithelial.1.1.1.1	1-region_8	2	STRIP1	1	110574199	110617263
Epithelial.Epithelial.1.1.1.1	1-region_8	2	SLC16A4	1	110905470	110933704
Epithelial.Epithelial.1.1.1.1	1-region_8	2	LAMTOR5	1	110943871	110950564
Epithelial.Epithelial.1.1.1.1	1-region_8	2	CD53	1	111415775	111442550
Epithelial.Epithelial.1.1.1.1	1-region_8	2	LRIF1	1	111489807	111506701
Epithelial.Epithelial.1.1.1.1	1-region_8	2	DRAM2	1	111659955	111682838
Epithelial.Epithelial.1.1.1.1	1-region_8	2	CEPT1	1	111682249	111727724
Epithelial.Epithelial.1.1.1.1	1-region_8	2	DENND2D	1	111729796	111747157
Epithelial.Epithelial.1.1.1.1	1-region_8	2	WDR77	1	111982512	111991998
Epithelial.Epithelial.1.1.1.1	1-region_8	2	ATP5F1	1	111991486	112005395
Epithelial.Epithelial.1.1.1.1	1-region_8	2	RAP1A	1	112084840	112259313
Epithelial.Epithelial.1.1.1.1	1-region_8	2	CTTNBP2NL	1	112938803	113006078
Epithelial.Epithelial.1.1.1.1	1-region_8	2	CAPZA1	1	113161795	113214241
Epithelial.Epithelial.1.1.1.1	1-region_8	2	MOV10	1	113215763	113243368
Epithelial.Epithelial.1.1.1.1	1-region_8	2	RHOC	1	113243728	113250056
Epithelial.Epithelial.1.1.1.1	1-region_8	2	SLC16A1	1	113454469	113499635
Epithelial.Epithelial.1.1.1.1	1-region_8	2	MAGI3	1	113933371	114228545
Epithelial.Epithelial.1.1.1.1	1-region_8	2	PHTF1	1	114239453	114302111
Epithelial.Epithelial.1.1.1.1	1-region_8	2	RSBN1	1	114304454	114355098
Epithelial.Epithelial.1.1.1.1	1-region_8	2	BCL2L15	1	114420790	114430169
Epithelial.Epithelial.1.1.1.1	1-region_8	2	AP4B1	1	114437370	114447823
Epithelial.Epithelial.1.1.1.1	1-region_8	2	HIPK1	1	114471814	114520426
Epithelial.Epithelial.1.1.1.1	1-region_8	2	TRIM33	1	114935399	115053781
Epithelial.Epithelial.1.1.1.1	1-region_8	2	BCAS2	1	115110178	115124260
Epithelial.Epithelial.1.1.1.1	1-region_8	2	NRAS	1	115247090	115259515
Epithelial.Epithelial.1.1.1.1	1-region_8	2	CSDE1	1	115259534	115301297
Epithelial.Epithelial.1.1.1.1	1-region_8	2	SIKE1	1	115312100	115323306
Epithelial.Epithelial.1.1.1.1	1-region_8	2	TSPAN2	1	115590632	115632121
Epithelial.Epithelial.1.1.1.1	1-region_8	2	VANGL1	1	116184574	116240845
Epithelial.Epithelial.1.1.1.1	1-region_8	2	ATP1A1	1	116915290	116952883
Epithelial.Epithelial.1.1.1.1	1-region_8	2	CD58	1	117057157	117113661
Epithelial.Epithelial.1.1.1.1	1-region_8	2	CD2	1	117297007	117311850
Epithelial.Epithelial.1.1.1.1	1-region_8	2	PTGFRN	1	117452679	117532980
Epithelial.Epithelial.1.1.1.1	1-region_8	2	TTF2	1	117602925	117650075
Epithelial.Epithelial.1.1.1.1	1-region_8	2	VTCN1	1	117686209	117753556
Epithelial.Epithelial.1.1.1.1	1-region_8	2	MAN1A2	1	117910071	118071494
Epithelial.Epithelial.1.1.1.1	1-region_8	2	FAM46C	1	118148556	118170994
Epithelial.Epithelial.1.1.1.1	1-region_8	2	GDAP2	1	118406107	118472253
Epithelial.Epithelial.1.1.1.1	1-region_8	2	WDR3	1	118472343	118509165
Epithelial.Epithelial.1.1.1.1	1-region_8	2	WARS2	1	119573839	119683294
Epithelial.Epithelial.1.1.1.1	1-region_8	2	PHGDH	1	120202421	120286838
Epithelial.Epithelial.1.1.1.1	1-region_8	2	NOTCH2	1	120454176	120612240
Epithelial.Epithelial.1.1.1.1	1-region_8	2	RP11-640M9.1	1	144456138	144521970
Epithelial.Epithelial.1.1.1.1	1-region_8	2	PDE4DIP	1	144836157	145076186
Epithelial.Epithelial.1.1.1.1	1-region_8	2	SEC22B	1	145096220	145116922
Epithelial.Epithelial.1.1.1.1	1-region_8	2	NOTCH2NL	1	145209119	145291972
Epithelial.Epithelial.1.1.1.1	1-region_8	2	NBPF10	1	145289772	145370303
Epithelial.Epithelial.1.1.1.1	1-region_8	2	TXNIP	1	145438469	145442635
Epithelial.Epithelial.1.1.1.1	1-region_8	2	POLR3GL	1	145456236	145470388
Epithelial.Epithelial.1.1.1.1	1-region_8	2	RBM8A	1	145507598	145513536
Epithelial.Epithelial.1.1.1.1	1-region_8	2	PEX11B	1	145516252	145523730
Epithelial.Epithelial.1.1.1.1	1-region_8	2	PIAS3	1	145575233	145586546
Epithelial.Epithelial.1.1.1.1	1-region_8	2	POLR3C	1	145592605	145611025
Epithelial.Epithelial.1.1.1.1	1-region_8	2	RNF115	1	145611036	145696218
Epithelial.Epithelial.1.1.1.1	1-region_8	2	GPR89A	1	145764411	145827103
Epithelial.Epithelial.1.1.1.1	1-region_8	2	PRKAB2	1	146626685	146644129
Epithelial.Epithelial.1.1.1.1	1-region_8	2	FMO5	1	146646930	146714700
Epithelial.Epithelial.1.1.1.1	1-region_8	2	CHD1L	1	146714291	146767443
Epithelial.Epithelial.1.1.1.1	1-region_8	2	BCL9	1	147013182	147098017
Epithelial.Epithelial.1.1.1.1	1-region_8	2	ACP6	1	147101453	147142618
Epithelial.Epithelial.1.1.1.1	1-region_10	4	GOLPH3L	1	150618701	150669630
Epithelial.Epithelial.1.1.1.1	1-region_10	4	CTSS	1	150702672	150738433
Epithelial.Epithelial.1.1.1.1	1-region_10	4	ARNT	1	150782181	150849244
Epithelial.Epithelial.1.1.1.1	1-region_10	4	SETDB1	1	150898739	150937213
Epithelial.Epithelial.1.1.1.1	1-region_10	4	CERS2	1	150933059	150947479
Epithelial.Epithelial.1.1.1.1	1-region_10	4	ANXA9	1	150954493	150968110
Epithelial.Epithelial.1.1.1.1	1-region_10	4	PRUNE	1	150980896	151008189
Epithelial.Epithelial.1.1.1.1	1-region_10	4	C1orf56	1	151020216	151024462
Epithelial.Epithelial.1.1.1.1	1-region_10	4	CDC42SE1	1	151023447	151042801
Epithelial.Epithelial.1.1.1.1	1-region_10	4	GABPB2	1	151043054	151098018
Epithelial.Epithelial.1.1.1.1	1-region_10	4	SCNM1	1	151129140	151142773
Epithelial.Epithelial.1.1.1.1	1-region_10	4	VPS72	1	151142463	151167797
Epithelial.Epithelial.1.1.1.1	1-region_10	4	PIP5K1A	1	151170425	151222012
Epithelial.Epithelial.1.1.1.1	1-region_10	4	PSMD4	1	151227179	151239955
Epithelial.Epithelial.1.1.1.1	1-region_10	4	PI4KB	1	151264273	151300191
Epithelial.Epithelial.1.1.1.1	1-region_11	5	RFX5	1	151313116	151319833
Epithelial.Epithelial.1.1.1.1	1-region_11	5	SELENBP1	1	151336778	151345209
Epithelial.Epithelial.1.1.1.1	1-region_11	5	PSMB4	1	151372010	151374420
Epithelial.Epithelial.1.1.1.1	1-region_11	5	POGZ	1	151375200	151431941
Epithelial.Epithelial.1.1.1.1	1-region_11	5	CGN	1	151482986	151511168
Epithelial.Epithelial.1.1.1.1	1-region_11	5	TUFT1	1	151512781	151556059
Epithelial.Epithelial.1.1.1.1	1-region_11	5	SNX27	1	151584541	151671567
Epithelial.Epithelial.1.1.1.1	1-region_11	5	MRPL9	1	151732119	151736040
Epithelial.Epithelial.1.1.1.1	1-region_11	5	THEM4	1	151846060	151882284
Epithelial.Epithelial.1.1.1.1	1-region_11	5	S100A10	1	151955391	151966866
Epithelial.Epithelial.1.1.1.1	1-region_11	5	S100A11	1	152004982	152020383
Epithelial.Epithelial.1.1.1.1	1-region_11	5	CRCT1	1	152486978	152488486
Epithelial.Epithelial.1.1.1.1	1-region_11	5	SPRR3	1	152974223	152976332
Epithelial.Epithelial.1.1.1.1	1-region_11	5	SPRR1B	1	153003678	153005376
Epithelial.Epithelial.1.1.1.1	1-region_11	5	S100A9	1	153330330	153333503
Epithelial.Epithelial.1.1.1.1	1-region_11	5	S100A6	1	153507075	153508720
Epithelial.Epithelial.1.1.1.1	1-region_11	5	S100A4	1	153516089	153522612
Epithelial.Epithelial.1.1.1.1	1-region_11	5	S100A3	1	153519805	153521848
Epithelial.Epithelial.1.1.1.1	1-region_11	5	S100A2	1	153533584	153540366
Epithelial.Epithelial.1.1.1.1	1-region_11	5	S100A16	1	153579362	153585621
Epithelial.Epithelial.1.1.1.1	1-region_11	5	S100A14	1	153586731	153589462
Epithelial.Epithelial.1.1.1.1	1-region_11	5	S100A13	1	153591263	153606568
Epithelial.Epithelial.1.1.1.1	1-region_11	5	CHTOP	1	153606525	153618782
Epithelial.Epithelial.1.1.1.1	1-region_11	5	SNAPIN	1	153631130	153634306
Epithelial.Epithelial.1.1.1.1	1-region_11	5	ILF2	1	153634512	153643524
Epithelial.Epithelial.1.1.1.1	1-region_11	5	INTS3	1	153700543	153746555
Epithelial.Epithelial.1.1.1.1	1-region_11	5	GATAD2B	1	153777201	153895451
Epithelial.Epithelial.1.1.1.1	1-region_11	5	CRTC2	1	153920145	153931101
Epithelial.Epithelial.1.1.1.1	1-region_11	5	SLC39A1	1	153931575	153940188
Epithelial.Epithelial.1.1.1.1	1-region_11	5	CREB3L4	1	153940010	153946839
Epithelial.Epithelial.1.1.1.1	1-region_11	5	JTB	1	153946745	153950164
Epithelial.Epithelial.1.1.1.1	1-region_11	5	RAB13	1	153954127	153958834
Epithelial.Epithelial.1.1.1.1	1-region_11	5	RPS27	1	153963235	153964626
Epithelial.Epithelial.1.1.1.1	1-region_11	5	TPM3	1	154127784	154167124
Epithelial.Epithelial.1.1.1.1	1-region_11	5	C1orf43	1	154179182	154193104
Epithelial.Epithelial.1.1.1.1	1-region_11	5	UBAP2L	1	154192655	154243986
Epithelial.Epithelial.1.1.1.1	1-region_11	5	HAX1	1	154244987	154248351
Epithelial.Epithelial.1.1.1.1	1-region_11	5	IL6R	1	154377669	154441926
Epithelial.Epithelial.1.1.1.1	1-region_11	5	UBE2Q1	1	154521053	154531504
Epithelial.Epithelial.1.1.1.1	1-region_11	5	ADAR	1	154554538	154600475
Epithelial.Epithelial.1.1.1.1	1-region_11	5	PMVK	1	154897210	154909467
Epithelial.Epithelial.1.1.1.1	1-region_11	5	PBXIP1	1	154916552	154928599
Epithelial.Epithelial.1.1.1.1	1-region_11	5	PYGO2	1	154929502	154936329
Epithelial.Epithelial.1.1.1.1	1-region_11	5	SHC1	1	154934774	154946871
Epithelial.Epithelial.1.1.1.1	1-region_11	5	CKS1B	1	154947129	154951725
Epithelial.Epithelial.1.1.1.1	1-region_11	5	FLAD1	1	154955814	154965587
Epithelial.Epithelial.1.1.1.1	1-region_11	5	ZBTB7B	1	154975127	154990998
Epithelial.Epithelial.1.1.1.1	1-region_11	5	ADAM15	1	155023042	155035252
Epithelial.Epithelial.1.1.1.1	1-region_11	5	EFNA4	1	155036207	155042029
Epithelial.Epithelial.1.1.1.1	1-region_11	5	EFNA1	1	155099936	155107333
Epithelial.Epithelial.1.1.1.1	1-region_11	5	SLC50A1	1	155107820	155111329
Epithelial.Epithelial.1.1.1.1	1-region_11	5	DPM3	1	155112367	155113071
Epithelial.Epithelial.1.1.1.1	1-region_11	5	KRTCAP2	1	155141884	155145951
Epithelial.Epithelial.1.1.1.1	1-region_11	5	MUC1	1	155158300	155162707
Epithelial.Epithelial.1.1.1.1	1-region_11	5	MTX1	1	155178490	155183615
Epithelial.Epithelial.1.1.1.1	1-region_11	5	GBA	1	155204243	155214490
Epithelial.Epithelial.1.1.1.1	1-region_11	5	FAM189B	1	155216996	155225274
Epithelial.Epithelial.1.1.1.1	1-region_11	5	SCAMP3	1	155225770	155232221
Epithelial.Epithelial.1.1.1.1	1-region_11	5	CLK2	1	155232659	155248282
Epithelial.Epithelial.1.1.1.1	1-region_12	4	FDPS	1	155278539	155290457
Epithelial.Epithelial.1.1.1.1	1-region_12	4	RUSC1	1	155290687	155300905
Epithelial.Epithelial.1.1.1.1	1-region_12	4	ASH1L	1	155305059	155532598
Epithelial.Epithelial.1.1.1.1	1-region_12	4	MSTO1	1	155579979	155718153
Epithelial.Epithelial.1.1.1.1	1-region_12	4	YY1AP1	1	155629237	155658791
Epithelial.Epithelial.1.1.1.1	1-region_12	4	DAP3	1	155657751	155708801
Epithelial.Epithelial.1.1.1.1	1-region_12	4	GON4L	1	155719508	155829191
Epithelial.Epithelial.1.1.1.1	1-region_12	4	RIT1	1	155867599	155881195
Epithelial.Epithelial.1.1.1.1	1-region_12	4	KIAA0907	1	155882834	155904191
Epithelial.Epithelial.1.1.1.1	1-region_12	4	ARHGEF2	1	155916630	155976861
Epithelial.Epithelial.1.1.1.1	1-region_12	4	SSR2	1	155978839	155990750
Epithelial.Epithelial.1.1.1.1	1-region_12	4	UBQLN4	1	156005092	156023585
Epithelial.Epithelial.1.1.1.1	1-region_12	4	LAMTOR2	1	156024543	156028301
Epithelial.Epithelial.1.1.1.1	1-region_12	4	RAB25	1	156030951	156040295
Epithelial.Epithelial.1.1.1.1	1-region_12	4	LMNA	1	156052364	156109880
Epithelial.Epithelial.1.1.1.1	1-region_12	4	SEMA4A	1	156117157	156147543
Epithelial.Epithelial.1.1.1.1	1-region_12	4	SLC25A44	1	156163880	156182587
Epithelial.Epithelial.1.1.1.1	1-region_12	4	PMF1	1	156182784	156212874
Epithelial.Epithelial.1.1.1.1	1-region_12	4	SMG5	1	156219015	156252620
Epithelial.Epithelial.1.1.1.1	1-region_12	4	C1orf85	1	156259880	156265463
Epithelial.Epithelial.1.1.1.1	1-region_12	4	CCT3	1	156278759	156337664
Epithelial.Epithelial.1.1.1.1	1-region_12	4	MEF2D	1	156433519	156470620
Epithelial.Epithelial.1.1.1.1	1-region_12	4	IQGAP3	1	156495197	156542396
Epithelial.Epithelial.1.1.1.1	1-region_12	4	APOA1BP	1	156561554	156564091
Epithelial.Epithelial.1.1.1.1	1-region_12	4	GPATCH4	1	156564279	156571288
Epithelial.Epithelial.1.1.1.1	1-region_12	4	NES	1	156638555	156647189
Epithelial.Epithelial.1.1.1.1	1-region_12	4	CRABP2	1	156669398	156675608
Epithelial.Epithelial.1.1.1.1	1-region_12	4	ISG20L2	1	156691683	156698591
Epithelial.Epithelial.1.1.1.1	1-region_12	4	RRNAD1	1	156698234	156706752
Epithelial.Epithelial.1.1.1.1	1-region_12	4	MRPL24	1	156707095	156711382
Epithelial.Epithelial.1.1.1.1	1-region_12	4	HDGF	1	156711899	156736717
Epithelial.Epithelial.1.1.1.1	1-region_12	4	PRCC	1	156720402	156770607
Epithelial.Epithelial.1.1.1.1	1-region_12	4	ETV3	1	157090983	157108266
Epithelial.Epithelial.1.1.1.1	1-region_12	4	IFI16	1	158969758	159024945
Epithelial.Epithelial.1.1.1.1	1-region_12	4	APCS	1	159557615	159558655
Epithelial.Epithelial.1.1.1.1	1-region_12	4	CRP	1	159682079	159684379
Epithelial.Epithelial.1.1.1.1	1-region_12	4	DUSP23	1	159750722	159752333
Epithelial.Epithelial.1.1.1.1	1-region_12	4	TAGLN2	1	159887897	159895522
Epithelial.Epithelial.1.1.1.1	1-region_12	4	IGSF9	1	159896829	159915386
Epithelial.Epithelial.1.1.1.1	1-region_12	4	LINC01133	1	159931008	159948851
Epithelial.Epithelial.1.1.1.1	1-region_12	4	PIGM	1	159997462	160001783
Epithelial.Epithelial.1.1.1.1	1-region_12	4	IGSF8	1	160061130	160068733
Epithelial.Epithelial.1.1.1.1	1-region_12	4	PEA15	1	160175127	160185166
Epithelial.Epithelial.1.1.1.1	1-region_12	4	DCAF8	1	160185505	160254920
Epithelial.Epithelial.1.1.1.1	1-region_14	4	RGS2	1	192778169	192781403
Epithelial.Epithelial.1.1.1.1	1-region_14	4	UCHL5	1	192981380	193029237
Epithelial.Epithelial.1.1.1.1	1-region_14	4	TROVE2	1	193028552	193060907
Epithelial.Epithelial.1.1.1.1	1-region_14	4	GLRX2	1	193065598	193075244
Epithelial.Epithelial.1.1.1.1	1-region_14	4	CDC73	1	193091147	193223031
Epithelial.Epithelial.1.1.1.1	1-region_14	4	CFH	1	196621008	196716634
Epithelial.Epithelial.1.1.1.1	1-region_14	4	ASPM	1	197053258	197115824
Epithelial.Epithelial.1.1.1.1	1-region_14	4	ZBTB41	1	197122810	197169672
Epithelial.Epithelial.1.1.1.1	1-region_14	4	DENND1B	1	197473878	197744826
Epithelial.Epithelial.1.1.1.1	1-region_14	4	C1orf53	1	197871777	197876497
Epithelial.Epithelial.1.1.1.1	1-region_14	4	NEK7	1	198126093	198291550
Epithelial.Epithelial.1.1.1.1	1-region_14	4	PTPRC	1	198607801	198726545
Epithelial.Epithelial.1.1.1.1	1-region_14	4	NR5A2	1	199996730	200146552
Epithelial.Epithelial.1.1.1.1	1-region_14	4	ZNF281	1	200374068	200379184
Epithelial.Epithelial.1.1.1.1	1-region_14	4	KIF14	1	200520628	200589862
Epithelial.Epithelial.1.1.1.1	1-region_14	4	DDX59	1	200593024	200639097
Epithelial.Epithelial.1.1.1.1	1-region_15	5	CAMSAP2	1	200708686	200829832
Epithelial.Epithelial.1.1.1.1	1-region_15	5	C1orf106	1	200860176	200884863
Epithelial.Epithelial.1.1.1.1	1-region_15	5	TMEM9	1	201103900	201140702
Epithelial.Epithelial.1.1.1.1	1-region_15	5	LAD1	1	201342372	201368736
Epithelial.Epithelial.1.1.1.1	1-region_15	5	PHLDA3	1	201434620	201438365
Epithelial.Epithelial.1.1.1.1	1-region_15	5	CSRP1	1	201452658	201478584
Epithelial.Epithelial.1.1.1.1	1-region_15	5	NAV1	1	201592411	201796102
Epithelial.Epithelial.1.1.1.1	1-region_15	5	IPO9	1	201798269	201853422
Epithelial.Epithelial.1.1.1.1	1-region_15	5	SHISA4	1	201857808	201861434
Epithelial.Epithelial.1.1.1.1	1-region_15	5	TIMM17A	1	201924619	201939789
Epithelial.Epithelial.1.1.1.1	1-region_15	5	RNPEP	1	201951500	201975275
Epithelial.Epithelial.1.1.1.1	1-region_15	5	RP11-465N4.4	1	201969222	201979481
Epithelial.Epithelial.1.1.1.1	1-region_15	5	ELF3	1	201977073	201986316
Epithelial.Epithelial.1.1.1.1	1-region_15	5	ARL8A	1	202102532	202113869
Epithelial.Epithelial.1.1.1.1	1-region_15	5	UBE2T	1	202300785	202311108
Epithelial.Epithelial.1.1.1.1	1-region_15	5	PPP1R12B	1	202317827	202561834
Epithelial.Epithelial.1.1.1.1	1-region_15	5	KDM5B	1	202696526	202778598
Epithelial.Epithelial.1.1.1.1	1-region_15	5	RABIF	1	202848085	202858263
Epithelial.Epithelial.1.1.1.1	1-region_15	5	KLHL12	1	202860228	202897764
Epithelial.Epithelial.1.1.1.1	1-region_15	5	ADIPOR1	1	202909951	202927700
Epithelial.Epithelial.1.1.1.1	1-region_15	5	CYB5R1	1	202930997	202936408
Epithelial.Epithelial.1.1.1.1	1-region_15	5	TMEM183A	1	202976514	202993976
Epithelial.Epithelial.1.1.1.1	1-region_15	5	BTG2	1	203274619	203278730
Epithelial.Epithelial.1.1.1.1	1-region_15	5	ATP2B4	1	203595689	203713209
Epithelial.Epithelial.1.1.1.1	1-region_15	5	ZC3H11A	1	203764782	203823252
Epithelial.Epithelial.1.1.1.1	1-region_15	5	ZBED6	1	203765437	203769686
Epithelial.Epithelial.1.1.1.1	1-region_15	5	SNRPE	1	203830731	203839678
Epithelial.Epithelial.1.1.1.1	1-region_15	5	SOX13	1	204042243	204096863
Epithelial.Epithelial.1.1.1.1	1-region_15	5	KISS1	1	204159469	204165614
Epithelial.Epithelial.1.1.1.1	1-region_15	5	GOLT1A	1	204167288	204183220
Epithelial.Epithelial.1.1.1.1	1-region_15	5	PLEKHA6	1	204187979	204346793
Epithelial.Epithelial.1.1.1.1	1-region_15	5	PPP1R15B	1	204372515	204380919
Epithelial.Epithelial.1.1.1.1	1-region_15	5	PIK3C2B	1	204391756	204463852
Epithelial.Epithelial.1.1.1.1	1-region_15	5	MDM4	1	204485511	204542871
Epithelial.Epithelial.1.1.1.1	1-region_15	5	RBBP5	1	205055270	205091143
Epithelial.Epithelial.1.1.1.1	1-region_15	5	DSTYK	1	205111632	205180727
Epithelial.Epithelial.1.1.1.1	1-region_15	5	LEMD1	1	205350506	205425082
Epithelial.Epithelial.1.1.1.1	1-region_15	5	CDK18	1	205473723	205501921
Epithelial.Epithelial.1.1.1.1	1-region_15	5	ELK4	1	205577071	205601090
Epithelial.Epithelial.1.1.1.1	1-region_15	5	NUCKS1	1	205681947	205719404
Epithelial.Epithelial.1.1.1.1	1-region_15	5	RAB7L1	1	205737114	205744588
Epithelial.Epithelial.1.1.1.1	1-region_15	5	SLC41A1	1	205758221	205782876
Epithelial.Epithelial.1.1.1.1	1-region_15	5	SLC26A9	1	205882176	205912588
Epithelial.Epithelial.1.1.1.1	1-region_15	5	CTSE	1	206317459	206332104
Epithelial.Epithelial.1.1.1.1	1-region_15	5	SRGAP2	1	206516200	206637783
Epithelial.Epithelial.1.1.1.1	1-region_15	5	IKBKE	1	206643791	206670223
Epithelial.Epithelial.1.1.1.1	1-region_15	5	RASSF5	1	206680879	206762616
Epithelial.Epithelial.1.1.1.1	1-region_15	5	EIF2D	1	206744620	206785904
Epithelial.Epithelial.1.1.1.1	1-region_15	5	MAPKAPK2	1	206858289	206907628
Epithelial.Epithelial.1.1.1.1	1-region_15	5	PIGR	1	207101863	207119811
Epithelial.Epithelial.1.1.1.1	1-region_15	5	C1orf116	1	207191866	207206101
Epithelial.Epithelial.1.1.1.1	1-region_15	5	YOD1	1	207217194	207226325
Epithelial.Epithelial.1.1.1.1	1-region_15	5	PFKFB2	1	207222801	207254369
Epithelial.Epithelial.1.1.1.1	1-region_15	5	C4BPB	1	207262187	207273338
Epithelial.Epithelial.1.1.1.1	1-region_15	5	C4BPA	1	207277607	207318317
Epithelial.Epithelial.1.1.1.1	1-region_15	5	CD55	1	207494853	207534311
Epithelial.Epithelial.1.1.1.1	1-region_15	5	CD46	1	207925402	207968858
Epithelial.Epithelial.1.1.1.1	1-region_15	5	PLXNA2	1	208195587	208417665
Epithelial.Epithelial.1.1.1.1	1-region_15	5	LAMB3	1	209788215	209825811
Epithelial.Epithelial.1.1.1.1	1-region_15	5	G0S2	1	209848765	209849733
Epithelial.Epithelial.1.1.1.1	1-region_15	5	IRF6	1	209959036	209979465
Epithelial.Epithelial.1.1.1.1	1-region_15	5	DIEXF	1	210001352	210030910
Epithelial.Epithelial.1.1.1.1	1-region_15	5	SERTAD4-AS1	1	210404801	210407392
Epithelial.Epithelial.1.1.1.1	1-region_15	5	RCOR3	1	211431719	211489727
Epithelial.Epithelial.1.1.1.1	1-region_15	5	TRAF5	1	211499957	211548288
Epithelial.Epithelial.1.1.1.1	1-region_15	5	LINC00467	1	211556145	211605878
Epithelial.Epithelial.1.1.1.1	1-region_15	5	SLC30A1	1	211744910	211752084
Epithelial.Epithelial.1.1.1.1	1-region_15	5	NEK2	1	211836114	211848960
Epithelial.Epithelial.1.1.1.1	1-region_15	5	LPGAT1	1	211916799	212004114
Epithelial.Epithelial.1.1.1.1	1-region_15	5	INTS7	1	212113741	212208884
Epithelial.Epithelial.1.1.1.1	1-region_15	5	DTL	1	212208919	212280742
Epithelial.Epithelial.1.1.1.1	1-region_15	5	PPP2R5A	1	212458879	212535200
Epithelial.Epithelial.1.1.1.1	1-region_15	5	NENF	1	212606229	212619714
Epithelial.Epithelial.1.1.1.1	1-region_15	5	ATF3	1	212738676	212794119
Epithelial.Epithelial.1.1.1.1	1-region_15	5	NSL1	1	212899495	212965124
Epithelial.Epithelial.1.1.1.1	1-region_15	5	TATDN3	1	212965170	212989968
Epithelial.Epithelial.1.1.1.1	1-region_15	5	FLVCR1	1	213031597	213072705
Epithelial.Epithelial.1.1.1.1	1-region_15	5	ANGEL2	1	213165524	213189168
Epithelial.Epithelial.1.1.1.1	1-region_15	5	RPS6KC1	1	213224589	213448116
Epithelial.Epithelial.1.1.1.1	1-region_15	5	PROX1	1	214156524	214214595
Epithelial.Epithelial.1.1.1.1	1-region_15	5	SMYD2	1	214454445	214510474
Epithelial.Epithelial.1.1.1.1	1-region_15	5	PTPN14	1	214522039	214725792
Epithelial.Epithelial.1.1.1.1	1-region_15	5	CENPF	1	214776538	214837931
Epithelial.Epithelial.1.1.1.1	1-region_15	5	KCTD3	1	215740735	215795149
Epithelial.Epithelial.1.1.1.1	1-region_15	5	GPATCH2	1	217600334	217804424
Epithelial.Epithelial.1.1.1.1	1-region_15	5	RRP15	1	218458629	218511325
Epithelial.Epithelial.1.1.1.1	1-region_15	5	TGFB2	1	218519577	218617961
Epithelial.Epithelial.1.1.1.1	1-region_15	5	LYPLAL1	1	219347186	219386207
Epithelial.Epithelial.1.1.1.1	1-region_15	5	EPRS	1	220141943	220220000
Epithelial.Epithelial.1.1.1.1	1-region_15	5	BPNT1	1	220230824	220263804
Epithelial.Epithelial.1.1.1.1	1-region_15	5	IARS2	1	220267444	220321380
Epithelial.Epithelial.1.1.1.1	1-region_15	5	RAB3GAP2	1	220321635	220445796
Epithelial.Epithelial.1.1.1.1	1-region_15	5	2024-03-02	1	220921567	220958150
Epithelial.Epithelial.1.1.1.1	1-region_15	5	DUSP10	1	221874766	221915518
Epithelial.Epithelial.1.1.1.1	1-region_15	5	MIA3	1	222791428	222841354
Epithelial.Epithelial.1.1.1.1	1-region_15	5	AIDA	1	222841355	222886552
Epithelial.Epithelial.1.1.1.1	1-region_15	5	BROX	1	222885895	222908538
Epithelial.Epithelial.1.1.1.1	1-region_15	5	RP11-452F19.3	1	222988364	223010726
Epithelial.Epithelial.1.1.1.1	1-region_15	5	CAPN8	1	223711349	223853436
Epithelial.Epithelial.1.1.1.1	1-region_15	5	CAPN2	1	223889295	223963720
Epithelial.Epithelial.1.1.1.1	1-region_15	5	TP53BP2	1	223967601	224033674
Epithelial.Epithelial.1.1.1.1	1-region_15	5	FBXO28	1	224301789	224349749
Epithelial.Epithelial.1.1.1.1	1-region_15	5	DEGS1	1	224363458	224381143
Epithelial.Epithelial.1.1.1.1	1-region_15	5	NVL	1	224415036	224518089
Epithelial.Epithelial.1.1.1.1	1-region_15	5	CNIH4	1	224544552	224567161
Epithelial.Epithelial.1.1.1.1	1-region_15	5	WDR26	1	224572845	224624735
Epithelial.Epithelial.1.1.1.1	1-region_15	5	DNAH14	1	225083964	225586996
Epithelial.Epithelial.1.1.1.1	1-region_15	5	LBR	1	225589204	225616627
Epithelial.Epithelial.1.1.1.1	1-region_15	5	ENAH	1	225674537	225840844
Epithelial.Epithelial.1.1.1.1	1-region_15	5	SRP9	1	225965531	225978168
Epithelial.Epithelial.1.1.1.1	1-region_15	5	EPHX1	1	225997794	226033260
Epithelial.Epithelial.1.1.1.1	1-region_15	5	TMEM63A	1	226033237	226070069
Epithelial.Epithelial.1.1.1.1	1-region_15	5	PYCR2	1	226107578	226111978
Epithelial.Epithelial.1.1.1.1	1-region_15	5	SDE2	1	226170403	226187032
Epithelial.Epithelial.1.1.1.1	1-region_15	5	H3F3A	1	226249552	226259702
Epithelial.Epithelial.1.1.1.1	1-region_15	5	ACBD3	1	226332380	226374431
Epithelial.Epithelial.1.1.1.1	1-region_15	5	PARP1	1	226548392	226595780
Epithelial.Epithelial.1.1.1.1	1-region_15	5	PSEN2	1	227057885	227083806
Epithelial.Epithelial.1.1.1.1	1-region_15	5	ADCK3	1	227085237	227175246
Epithelial.Epithelial.1.1.1.1	1-region_15	5	CDC42BPA	1	227177566	227506175
Epithelial.Epithelial.1.1.1.1	1-region_15	5	SNAP47	1	227916240	227968927
Epithelial.Epithelial.1.1.1.1	1-region_15	5	JMJD4	1	227918126	227923112
Epithelial.Epithelial.1.1.1.1	1-region_15	5	ARF1	1	228270361	228286912
Epithelial.Epithelial.1.1.1.1	1-region_15	5	C1orf35	1	228288427	228293112
Epithelial.Epithelial.1.1.1.1	1-region_15	5	MRPL55	1	228294380	228297013
Epithelial.Epithelial.1.1.1.1	1-region_15	5	GUK1	1	228327663	228336685
Epithelial.Epithelial.1.1.1.1	1-region_15	5	OBSCN	1	228395831	228566577
Epithelial.Epithelial.1.1.1.1	1-region_15	5	TRIM11	1	228581374	228594541
Epithelial.Epithelial.1.1.1.1	1-region_15	5	HIST3H2A	1	228645065	228645560
Epithelial.Epithelial.1.1.1.1	1-region_15	5	RNF187	1	228674762	228683467
Epithelial.Epithelial.1.1.1.1	1-region_15	5	RHOU	1	228870824	228882416
Epithelial.Epithelial.1.1.1.1	1-region_15	5	RAB4A	1	229406822	229441641
Epithelial.Epithelial.1.1.1.1	1-region_15	5	NUP133	1	229577045	229644103
Epithelial.Epithelial.1.1.1.1	1-region_15	5	ABCB10	1	229652329	229694442
Epithelial.Epithelial.1.1.1.1	1-region_15	5	TAF5L	1	229728858	229761794
Epithelial.Epithelial.1.1.1.1	1-region_15	5	GALNT2	1	230193536	230417870
Epithelial.Epithelial.1.1.1.1	1-region_15	5	COG2	1	230778235	230829728
Epithelial.Epithelial.1.1.1.1	1-region_15	5	AGT	1	230838269	230850043
Epithelial.Epithelial.1.1.1.1	1-region_15	5	C1orf198	1	230972865	231005335
Epithelial.Epithelial.1.1.1.1	1-region_15	5	TTC13	1	231041989	231114621
Epithelial.Epithelial.1.1.1.1	1-region_15	5	ARV1	1	231114727	231136341
Epithelial.Epithelial.1.1.1.1	1-region_15	5	FAM89A	1	231154704	231175992
Epithelial.Epithelial.1.1.1.1	1-region_15	5	C1orf131	1	231359509	231376933
Epithelial.Epithelial.1.1.1.1	1-region_15	5	GNPAT	1	231376953	231413719
Epithelial.Epithelial.1.1.1.1	1-region_15	5	EXOC8	1	231468480	231473598
Epithelial.Epithelial.1.1.1.1	1-region_15	5	SPRTN	1	231472850	231490769
Epithelial.Epithelial.1.1.1.1	1-region_15	5	EGLN1	1	231499497	231560790
Epithelial.Epithelial.1.1.1.1	1-region_15	5	RP11-295G20.2	1	231658134	231664302
Epithelial.Epithelial.1.1.1.1	1-region_15	5	TSNAX	1	231664399	231702270
Epithelial.Epithelial.1.1.1.1	1-region_15	5	SIPA1L2	1	232533711	232697304
Epithelial.Epithelial.1.1.1.1	1-region_15	5	NTPCR	1	233086351	233119628
Epithelial.Epithelial.1.1.1.1	1-region_15	5	PCNXL2	1	233119181	233431459
Epithelial.Epithelial.1.1.1.1	1-region_15	5	KCNK1	1	233749750	233808258
Epithelial.Epithelial.1.1.1.1	1-region_15	5	COA6	1	234509202	234519795
Epithelial.Epithelial.1.1.1.1	1-region_15	5	TARBP1	1	234527059	234614849
Epithelial.Epithelial.1.1.1.1	1-region_15	5	IRF2BP2	1	234740015	234745271
Epithelial.Epithelial.1.1.1.1	1-region_15	5	TOMM20	1	235272651	235292251
Epithelial.Epithelial.1.1.1.1	1-region_15	5	RBM34	1	235294498	235324772
Epithelial.Epithelial.1.1.1.1	1-region_15	5	ARID4B	1	235294949	235491534
Epithelial.Epithelial.1.1.1.1	1-region_16	4	GGPS1	1	235490665	235507847
Epithelial.Epithelial.1.1.1.1	1-region_16	4	TBCE	1	235530675	235612283
Epithelial.Epithelial.1.1.1.1	1-region_16	4	B3GALNT2	1	235613238	235667781
Epithelial.Epithelial.1.1.1.1	1-region_16	4	GNG4	1	235710987	235814054
Epithelial.Epithelial.1.1.1.1	1-region_16	4	LYST	1	235824341	236046940
Epithelial.Epithelial.1.1.1.1	1-region_16	4	NID1	1	236139130	236228462
Epithelial.Epithelial.1.1.1.1	1-region_16	4	GPR137B	1	236305832	236385165
Epithelial.Epithelial.1.1.1.1	1-region_16	4	ERO1LB	1	236378855	236445319
Epithelial.Epithelial.1.1.1.1	1-region_16	4	LGALS8	1	236681300	236716281
Epithelial.Epithelial.1.1.1.1	1-region_16	4	HEATR1	1	236712305	236767804
Epithelial.Epithelial.1.1.1.1	1-region_16	4	MTR	1	236958610	237067281
Epithelial.Epithelial.1.1.1.1	1-region_16	4	FH	1	241660903	241683061
Epithelial.Epithelial.1.1.1.1	1-region_16	4	OPN3	1	241753404	241840678
Epithelial.Epithelial.1.1.1.1	1-region_16	4	CHML	1	241792155	241799232
Epithelial.Epithelial.1.1.1.1	1-region_16	4	CEP170	1	243287730	243418650
Epithelial.Epithelial.1.1.1.1	1-region_16	4	SDCCAG8	1	243419320	243663394
Epithelial.Epithelial.1.1.1.1	1-region_16	4	AKT3	1	243651535	244014381
Epithelial.Epithelial.1.1.1.1	1-region_16	4	ZBTB18	1	244214585	244220778
Epithelial.Epithelial.1.1.1.1	1-region_16	4	ADSS	1	244571796	244615436
Epithelial.Epithelial.1.1.1.1	1-region_16	4	DESI2	1	244816237	244872335
Epithelial.Epithelial.1.1.1.1	1-region_16	4	COX20	1	244998624	245008359
Epithelial.Epithelial.1.1.1.1	1-region_16	4	HNRNPU-AS1	1	245003940	245018799
Epithelial.Epithelial.1.1.1.1	1-region_16	4	HNRNPU	1	245014468	245027844
Epithelial.Epithelial.1.1.1.1	1-region_16	4	EFCAB2	1	245133007	245290466
Epithelial.Epithelial.1.1.1.1	1-region_16	4	SMYD3	1	245912642	246670614
Epithelial.Epithelial.1.1.1.1	1-region_16	4	TFB2M	1	246703862	246729626
Epithelial.Epithelial.1.1.1.1	1-region_16	4	CNST	1	246729746	246831886
Epithelial.Epithelial.1.1.1.1	1-region_16	4	SCCPDH	1	246887349	246931439
Epithelial.Epithelial.1.1.1.1	1-region_16	4	AHCTF1	1	247002400	247095280
Epithelial.Epithelial.1.1.1.1	1-region_16	4	SH3BP5L	1	249104648	249120832
Epithelial.Epithelial.1.1.1.1	1-region_16	4	ZNF672	1	249132409	249143716
Epithelial.Epithelial.1.1.1.1	1-region_16	4	ZNF692	1	249144205	249153343
Epithelial.Epithelial.1.1.1.1	3-region_18	2	TRNT1	3	3168600	3192563
Epithelial.Epithelial.1.1.1.1	3-region_18	2	CRBN	3	3190676	3221394
Epithelial.Epithelial.1.1.1.1	3-region_18	2	SUMF1	3	3742498	4508965
Epithelial.Epithelial.1.1.1.1	3-region_18	2	LRRN1	3	3841121	3889387
Epithelial.Epithelial.1.1.1.1	3-region_18	2	BHLHE40	3	5020801	5027008
Epithelial.Epithelial.1.1.1.1	3-region_18	2	ARL8B	3	5163905	5222596
Epithelial.Epithelial.1.1.1.1	3-region_18	2	EDEM1	3	5229331	5261642
Epithelial.Epithelial.1.1.1.1	3-region_18	2	LMCD1	3	8543393	8609805
Epithelial.Epithelial.1.1.1.1	3-region_18	2	SETD5-AS1	3	9391373	9440263
Epithelial.Epithelial.1.1.1.1	3-region_18	2	THUMPD3	3	9404526	9428475
Epithelial.Epithelial.1.1.1.1	3-region_18	2	SETD5	3	9439299	9520924
Epithelial.Epithelial.1.1.1.1	3-region_18	2	MTMR14	3	9691117	9744077
Epithelial.Epithelial.1.1.1.1	3-region_18	2	TADA3	3	9821544	9834695
Epithelial.Epithelial.1.1.1.1	3-region_18	2	ARPC4	3	9834179	9849410
Epithelial.Epithelial.1.1.1.1	3-region_18	2	RPUSD3	3	9879533	9886286
Epithelial.Epithelial.1.1.1.1	3-region_18	2	CIDEC	3	9908398	9921938
Epithelial.Epithelial.1.1.1.1	3-region_18	2	JAGN1	3	9932238	9936033
Epithelial.Epithelial.1.1.1.1	3-region_18	2	IL17RE	3	9944296	9958086
Epithelial.Epithelial.1.1.1.1	3-region_18	2	IL17RC	3	9958758	9975314
Epithelial.Epithelial.1.1.1.1	3-region_18	2	CRELD1	3	9975506	9987097
Epithelial.Epithelial.1.1.1.1	3-region_18	2	EMC3	3	10004221	10052800
Epithelial.Epithelial.1.1.1.1	3-region_18	2	BRK1	3	10157276	10168874
Epithelial.Epithelial.1.1.1.1	3-region_18	2	VHL	3	10182692	10193904
Epithelial.Epithelial.1.1.1.1	3-region_18	2	SEC13	3	10334815	10362862
Epithelial.Epithelial.1.1.1.1	3-region_18	2	HRH1	3	11178779	11305243
Epithelial.Epithelial.1.1.1.1	3-region_18	2	VGLL4	3	11597544	11762220
Epithelial.Epithelial.1.1.1.1	3-region_18	2	PPARG	3	12328867	12475855
Epithelial.Epithelial.1.1.1.1	3-region_18	2	RAF1	3	12625100	12705725
Epithelial.Epithelial.1.1.1.1	3-region_18	2	TMEM40	3	12775024	12810956
Epithelial.Epithelial.1.1.1.1	3-region_18	2	RPL32	3	12875984	12883087
Epithelial.Epithelial.1.1.1.1	3-region_18	2	IQSEC1	3	12938719	13114617
Epithelial.Epithelial.1.1.1.1	3-region_18	2	NUP210	3	13357737	13461809
Epithelial.Epithelial.1.1.1.1	3-region_18	2	HDAC11	3	13521224	13547916
Epithelial.Epithelial.1.1.1.1	3-region_18	2	WNT7A	3	13857755	13921618
Epithelial.Epithelial.1.1.1.1	3-region_18	2	CHCHD4	3	14153580	14166370
Epithelial.Epithelial.1.1.1.1	3-region_18	2	TMEM43	3	14166440	14185179
Epithelial.Epithelial.1.1.1.1	3-region_18	2	XPC	3	14186647	14220283
Epithelial.Epithelial.1.1.1.1	3-region_19	1	LSM3	3	14219858	14242619
Epithelial.Epithelial.1.1.1.1	3-region_19	1	SLC6A6	3	14444076	14530857
Epithelial.Epithelial.1.1.1.1	3-region_19	1	CCDC174	3	14693271	14714166
Epithelial.Epithelial.1.1.1.1	3-region_19	1	FGD5-AS1	3	14961854	14989931
Epithelial.Epithelial.1.1.1.1	3-region_19	1	MRPS25	3	15083967	15106842
Epithelial.Epithelial.1.1.1.1	3-region_19	1	CAPN7	3	15247659	15294425
Epithelial.Epithelial.1.1.1.1	3-region_19	1	EAF1	3	15468862	15484120
Epithelial.Epithelial.1.1.1.1	3-region_19	1	ANKRD28	3	15708743	15901278
Epithelial.Epithelial.1.1.1.1	3-region_19	1	DPH3	3	16299485	16306479
Epithelial.Epithelial.1.1.1.1	3-region_19	1	TBC1D5	3	17198654	18486309
Epithelial.Epithelial.1.1.1.1	3-region_19	1	RAB5A	3	19988571	20026667
Epithelial.Epithelial.1.1.1.1	3-region_19	1	SGOL1	3	20202085	20227784
Epithelial.Epithelial.1.1.1.1	3-region_19	1	UBE2E1	3	23847394	23932807
Epithelial.Epithelial.1.1.1.1	3-region_19	1	RPL15	3	23958036	23965183
Epithelial.Epithelial.1.1.1.1	3-region_19	1	NR1D2	3	23986751	24022109
Epithelial.Epithelial.1.1.1.1	3-region_19	1	TOP2B	3	25639475	25706398
Epithelial.Epithelial.1.1.1.1	3-region_19	1	NGLY1	3	25760435	25831530
Epithelial.Epithelial.1.1.1.1	3-region_19	1	CMC1	3	28283075	28366633
Epithelial.Epithelial.1.1.1.1	3-region_19	1	AZI2	3	28356494	28390618
Epithelial.Epithelial.1.1.1.1	3-region_19	1	TGFBR2	3	30647994	30735634
Epithelial.Epithelial.1.1.1.1	3-region_19	1	STT3B	3	31574130	31679112
Epithelial.Epithelial.1.1.1.1	3-region_19	1	OSBPL10	3	31699382	32119072
Epithelial.Epithelial.1.1.1.1	3-region_19	1	CMTM8	3	32280171	32411817
Epithelial.Epithelial.1.1.1.1	3-region_19	1	CMTM7	3	32433163	32524559
Epithelial.Epithelial.1.1.1.1	3-region_19	1	CMTM6	3	32522804	32544900
Epithelial.Epithelial.1.1.1.1	3-region_19	1	DYNC1LI1	3	32567463	32612366
Epithelial.Epithelial.1.1.1.1	3-region_19	1	CNOT10	3	32726637	32815367
Epithelial.Epithelial.1.1.1.1	3-region_19	1	GLB1	3	33038100	33138722
Epithelial.Epithelial.1.1.1.1	3-region_19	1	CRTAP	3	33155471	33189265
Epithelial.Epithelial.1.1.1.1	3-region_19	1	UBP1	3	33429828	33482863
Epithelial.Epithelial.1.1.1.1	3-region_19	1	PDCD6IP	3	33839844	33911194
Epithelial.Epithelial.1.1.1.1	3-region_19	1	EPM2AIP1	3	37027357	37034795
Epithelial.Epithelial.1.1.1.1	3-region_19	1	LRRFIP2	3	37094117	37225180
Epithelial.Epithelial.1.1.1.1	3-region_19	1	GOLGA4	3	37284668	37408242
Epithelial.Epithelial.1.1.1.1	3-region_19	1	CTDSPL	3	37903451	38025960
Epithelial.Epithelial.1.1.1.1	3-region_19	1	VILL	3	38029550	38048679
Epithelial.Epithelial.1.1.1.1	3-region_19	1	ACAA1	3	38144620	38178733
Epithelial.Epithelial.1.1.1.1	3-region_19	1	MYD88	3	38179969	38184513
Epithelial.Epithelial.1.1.1.1	3-region_19	1	OXSR1	3	38206580	38296979
Epithelial.Epithelial.1.1.1.1	3-region_19	1	WDR48	3	39093489	39138155
Epithelial.Epithelial.1.1.1.1	3-region_19	1	CSRNP1	3	39183346	39196053
Epithelial.Epithelial.1.1.1.1	3-region_19	1	SLC25A38	3	39424839	39438842
Epithelial.Epithelial.1.1.1.1	3-region_19	1	RPSA	3	39448180	39454033
Epithelial.Epithelial.1.1.1.1	3-region_19	1	EIF1B	3	40351175	40353915
Epithelial.Epithelial.1.1.1.1	3-region_19	1	ENTPD3-AS1	3	40355293	40494820
Epithelial.Epithelial.1.1.1.1	3-region_19	1	ENTPD3	3	40428647	40470110
Epithelial.Epithelial.1.1.1.1	3-region_19	1	RPL14	3	40498783	40503861
Epithelial.Epithelial.1.1.1.1	3-region_19	1	CTNNB1	3	41236328	41301587
Epithelial.Epithelial.1.1.1.1	3-region_19	1	TRAK1	3	42055294	42267381
Epithelial.Epithelial.1.1.1.1	3-region_19	1	SEC22C	3	42589461	42642572
Epithelial.Epithelial.1.1.1.1	3-region_19	1	SS18L2	3	42623332	42636606
Epithelial.Epithelial.1.1.1.1	3-region_19	1	NKTR	3	42642106	42690227
Epithelial.Epithelial.1.1.1.1	3-region_19	1	HIGD1A	3	42798669	42846023
Epithelial.Epithelial.1.1.1.1	3-region_19	1	SNRK	3	43328004	43466256
Epithelial.Epithelial.1.1.1.1	3-region_19	1	ABHD5	3	43731605	43775863
Epithelial.Epithelial.1.1.1.1	3-region_20	2	TCAIM	3	44379611	44450943
Epithelial.Epithelial.1.1.1.1	3-region_20	2	KIAA1143	3	44779153	44803154
Epithelial.Epithelial.1.1.1.1	3-region_20	2	TMEM42	3	44903361	44907162
Epithelial.Epithelial.1.1.1.1	3-region_20	2	ZDHHC3	3	44956749	45017677
Epithelial.Epithelial.1.1.1.1	3-region_20	2	EXOSC7	3	45016733	45077558
Epithelial.Epithelial.1.1.1.1	3-region_20	2	CDCP1	3	45123770	45187914
Epithelial.Epithelial.1.1.1.1	3-region_20	2	ALS2CL	3	46710487	46735194
Epithelial.Epithelial.1.1.1.1	3-region_20	2	CCDC12	3	46963216	47023500
Epithelial.Epithelial.1.1.1.1	3-region_20	2	NBEAL2	3	47021173	47051193
Epithelial.Epithelial.1.1.1.1	3-region_20	2	SETD2	3	47057919	47205457
Epithelial.Epithelial.1.1.1.1	3-region_20	2	KIF9	3	47269516	47324941
Epithelial.Epithelial.1.1.1.1	3-region_20	2	PTPN23	3	47422501	47454931
Epithelial.Epithelial.1.1.1.1	3-region_20	2	SCAP	3	47455203	47518616
Epithelial.Epithelial.1.1.1.1	3-region_20	2	ELP6	3	47537130	47555251
Epithelial.Epithelial.1.1.1.1	3-region_20	2	SMARCC1	3	47626762	47823596
Epithelial.Epithelial.1.1.1.1	3-region_20	2	DHX30	3	47844399	47891685
Epithelial.Epithelial.1.1.1.1	3-region_20	2	MAP4	3	47892182	48130769
Epithelial.Epithelial.1.1.1.1	3-region_20	2	NME6	3	48334754	48343175
Epithelial.Epithelial.1.1.1.1	3-region_20	2	PLXNB1	3	48445261	48471594
Epithelial.Epithelial.1.1.1.1	3-region_20	2	CCDC51	3	48473574	48481866
Epithelial.Epithelial.1.1.1.1	3-region_20	2	TMA7	3	48481667	48485616
Epithelial.Epithelial.1.1.1.1	3-region_20	2	SHISA5	3	48509197	48542259
Epithelial.Epithelial.1.1.1.1	3-region_20	2	UQCRC1	3	48636435	48648409
Epithelial.Epithelial.1.1.1.1	3-region_20	2	IP6K2	3	48725436	48777786
Epithelial.Epithelial.1.1.1.1	3-region_20	2	PRKAR2A	3	48782030	48885279
Epithelial.Epithelial.1.1.1.1	3-region_20	2	ARIH2	3	48956254	49023815
Epithelial.Epithelial.1.1.1.1	3-region_20	2	P4HTM	3	49027319	49044587
Epithelial.Epithelial.1.1.1.1	3-region_20	2	WDR6	3	49044495	49053386
Epithelial.Epithelial.1.1.1.1	3-region_20	2	DALRD3	3	49052921	49059726
Epithelial.Epithelial.1.1.1.1	3-region_20	2	NDUFAF3	3	49057892	49060928
Epithelial.Epithelial.1.1.1.1	3-region_20	2	IMPDH2	3	49061758	49066841
Epithelial.Epithelial.1.1.1.1	3-region_20	2	QRICH1	3	49067140	49131796
Epithelial.Epithelial.1.1.1.1	3-region_20	2	QARS	3	49133365	49142553
Epithelial.Epithelial.1.1.1.1	3-region_20	2	LAMB2	3	49158547	49170551
Epithelial.Epithelial.1.1.1.1	3-region_20	2	USP4	3	49315264	49378145
Epithelial.Epithelial.1.1.1.1	3-region_20	2	GPX1	3	49394609	49396033
Epithelial.Epithelial.1.1.1.1	3-region_20	2	RHOA	3	49396578	49450431
Epithelial.Epithelial.1.1.1.1	3-region_20	2	TCTA	3	49449639	49453908
Epithelial.Epithelial.1.1.1.1	3-region_20	2	DAG1	3	49506146	49573048
Epithelial.Epithelial.1.1.1.1	3-region_20	2	APEH	3	49711435	49721396
Epithelial.Epithelial.1.1.1.1	3-region_20	2	IP6K1	3	49761727	49823975
Epithelial.Epithelial.1.1.1.1	3-region_20	2	MST1R	3	49924435	49941299
Epithelial.Epithelial.1.1.1.1	3-region_20	2	RBM6	3	49977440	50137478
Epithelial.Epithelial.1.1.1.1	3-region_20	2	RBM5	3	50126341	50156454
Epithelial.Epithelial.1.1.1.1	3-region_20	2	GNAI2	3	50263724	50296787
Epithelial.Epithelial.1.1.1.1	3-region_20	2	SEMA3B	3	50304990	50314977
Epithelial.Epithelial.1.1.1.1	3-region_20	2	IFRD2	3	50325163	50330349
Epithelial.Epithelial.1.1.1.1	3-region_20	2	HYAL2	3	50355221	50360337
Epithelial.Epithelial.1.1.1.1	3-region_20	2	TUSC2	3	50357458	50365682
Epithelial.Epithelial.1.1.1.1	3-region_20	2	RASSF1	3	50367219	50378411
Epithelial.Epithelial.1.1.1.1	3-region_20	2	NPRL2	3	50384761	50388522
Epithelial.Epithelial.1.1.1.1	3-region_20	2	CYB561D2	3	50388126	50395891
Epithelial.Epithelial.1.1.1.1	3-region_20	2	TMEM115	3	50392180	50397041
Epithelial.Epithelial.1.1.1.1	3-region_20	2	MAPKAPK3	3	50648951	50686720
Epithelial.Epithelial.1.1.1.1	3-region_20	2	MANF	3	51422478	51426828
Epithelial.Epithelial.1.1.1.1	3-region_20	2	RBM15B	3	51428731	51435330
Epithelial.Epithelial.1.1.1.1	3-region_20	2	TEX264	3	51696709	51738339
Epithelial.Epithelial.1.1.1.1	3-region_20	2	RRP9	3	51967446	51975957
Epithelial.Epithelial.1.1.1.1	3-region_20	2	PARP3	3	51976361	51982883
Epithelial.Epithelial.1.1.1.1	3-region_20	2	PCBP4	3	51991470	52002426
Epithelial.Epithelial.1.1.1.1	3-region_20	2	ABHD14B	3	52002526	52017425
Epithelial.Epithelial.1.1.1.1	3-region_20	2	RPL29	3	52027616	52029958
Epithelial.Epithelial.1.1.1.1	3-region_20	2	DUSP7	3	52082935	52090566
Epithelial.Epithelial.1.1.1.1	3-region_20	2	ALAS1	3	52232102	52248343
Epithelial.Epithelial.1.1.1.1	3-region_20	2	TWF2	3	52262626	52273276
Epithelial.Epithelial.1.1.1.1	3-region_20	2	WDR82	3	52288437	52322036
Epithelial.Epithelial.1.1.1.1	3-region_20	2	BAP1	3	52435029	52444366
Epithelial.Epithelial.1.1.1.1	3-region_20	2	NISCH	3	52489134	52527087
Epithelial.Epithelial.1.1.1.1	3-region_20	2	SMIM4	3	52568029	52613253
Epithelial.Epithelial.1.1.1.1	3-region_20	2	PBRM1	3	52579368	52719933
Epithelial.Epithelial.1.1.1.1	3-region_20	2	GNL3	3	52715172	52728508
Epithelial.Epithelial.1.1.1.1	3-region_20	2	GLT8D1	3	52728505	52740048
Epithelial.Epithelial.1.1.1.1	3-region_20	2	SPCS1	3	52738971	52742182
Epithelial.Epithelial.1.1.1.1	3-region_20	2	RFT1	3	53122499	53164478
Epithelial.Epithelial.1.1.1.1	3-region_20	2	PRKCD	3	53190025	53226733
Epithelial.Epithelial.1.1.1.1	3-region_20	2	TKT	3	53258723	53290068
Epithelial.Epithelial.1.1.1.1	3-region_20	2	DCP1A	3	53317447	53381654
Epithelial.Epithelial.1.1.1.1	3-region_20	2	CHDH	3	53846362	53880417
Epithelial.Epithelial.1.1.1.1	3-region_20	2	SELK	3	53918437	53926015
Epithelial.Epithelial.1.1.1.1	3-region_20	2	CCDC66	3	56591189	56655846
Epithelial.Epithelial.1.1.1.1	3-region_20	2	FAM208A	3	56654161	56717265
Epithelial.Epithelial.1.1.1.1	3-region_20	2	ARHGEF3	3	56761446	57113357
Epithelial.Epithelial.1.1.1.1	3-region_20	2	APPL1	3	57261765	57307496
Epithelial.Epithelial.1.1.1.1	3-region_20	2	ARF4	3	57557090	57583947
Epithelial.Epithelial.1.1.1.1	3-region_20	2	SLMAP	3	57741177	57914895
Epithelial.Epithelial.1.1.1.1	3-region_20	2	FLNB	3	57994127	58157982
Epithelial.Epithelial.1.1.1.1	3-region_20	2	RPP14	3	58291974	58310422
Epithelial.Epithelial.1.1.1.1	3-region_20	2	PDHB	3	58413357	58419584
Epithelial.Epithelial.1.1.1.1	3-region_20	2	FAM3D	3	58619673	58652575
Epithelial.Epithelial.1.1.1.1	3-region_20	2	THOC7	3	63819546	63849579
Epithelial.Epithelial.1.1.1.1	3-region_20	2	ATXN7	3	63850233	63989138
Epithelial.Epithelial.1.1.1.1	3-region_20	2	PSMD6	3	63996225	64009658
Epithelial.Epithelial.1.1.1.1	3-region_20	2	MAGI1	3	65339200	66024509
Epithelial.Epithelial.1.1.1.1	3-region_20	2	SLC25A26	3	66119285	66438540
Epithelial.Epithelial.1.1.1.1	3-region_20	2	SUCLG2	3	67410884	67705038
Epithelial.Epithelial.1.1.1.1	3-region_20	2	TMF1	3	69068978	69101484
Epithelial.Epithelial.1.1.1.1	3-region_20	2	UBA3	3	69103881	69129559
Epithelial.Epithelial.1.1.1.1	3-region_20	2	ARL6IP5	3	69134095	69155217
Epithelial.Epithelial.1.1.1.1	3-region_20	2	FRMD4B	3	69219141	69591734
Epithelial.Epithelial.1.1.1.1	3-region_20	2	FOXP1	3	71003844	71633140
Epithelial.Epithelial.1.1.1.1	3-region_20	2	RYBP	3	72420976	72496069
Epithelial.Epithelial.1.1.1.1	3-region_20	2	PPP4R2	3	73045936	73118350
Epithelial.Epithelial.1.1.1.1	3-region_20	2	GBE1	3	81538850	81811312
Epithelial.Epithelial.1.1.1.1	3-region_20	2	CHMP2B	3	87276421	87304698
Epithelial.Epithelial.1.1.1.1	3-region_20	2	CGGBP1	3	88101094	88199035
Epithelial.Epithelial.1.1.1.1	3-region_20	2	C3orf38	3	88198893	88217879
Epithelial.Epithelial.1.1.1.1	3-region_20	2	PROS1	3	93591881	93692910
Epithelial.Epithelial.1.1.1.1	3-region_20	2	ARL13B	3	93698983	93774512
Epithelial.Epithelial.1.1.1.1	3-region_20	2	MTRNR2L12	3	96335981	96337000
Epithelial.Epithelial.1.1.1.1	3-region_20	2	MINA	3	97660662	97691301
Epithelial.Epithelial.1.1.1.1	3-region_20	2	CLDND1	3	98216756	98241910
Epithelial.Epithelial.1.1.1.1	3-region_20	2	CPOX	3	98239976	98312567
Epithelial.Epithelial.1.1.1.1	3-region_20	2	DCBLD2	3	98514785	98620533
Epithelial.Epithelial.1.1.1.1	4-region_23	2	METAP1	4	99916771	99983964
Epithelial.Epithelial.1.1.1.1	4-region_23	2	ADH5	4	99992132	100009952
Epithelial.Epithelial.1.1.1.1	4-region_23	2	ADH4	4	100044808	100078949
Epithelial.Epithelial.1.1.1.1	4-region_23	2	ADH1B	4	100226121	100242558
Epithelial.Epithelial.1.1.1.1	4-region_23	2	TRMT10A	4	100467866	100485189
Epithelial.Epithelial.1.1.1.1	4-region_23	2	DAPP1	4	100737990	100791311
Epithelial.Epithelial.1.1.1.1	4-region_23	2	LAMTOR3	4	100799493	100815647
Epithelial.Epithelial.1.1.1.1	4-region_23	2	DNAJB14	4	100817405	100867883
Epithelial.Epithelial.1.1.1.1	4-region_23	2	H2AFZ	4	100869243	100871545
Epithelial.Epithelial.1.1.1.1	4-region_23	2	PPP3CA	4	101944566	102269435
Epithelial.Epithelial.1.1.1.1	4-region_23	2	SLC39A8	4	103172198	103352415
Epithelial.Epithelial.1.1.1.1	4-region_23	2	NFKB1	4	103422486	103538459
Epithelial.Epithelial.1.1.1.1	4-region_23	2	MANBA	4	103552660	103682151
Epithelial.Epithelial.1.1.1.1	4-region_23	2	UBE2D3	4	103715540	103790053
Epithelial.Epithelial.1.1.1.1	4-region_23	2	CISD2	4	103790135	103810399
Epithelial.Epithelial.1.1.1.1	4-region_23	2	BDH2	4	104000592	104021040
Epithelial.Epithelial.1.1.1.1	4-region_23	2	CENPE	4	104026963	104119566
Epithelial.Epithelial.1.1.1.1	4-region_23	2	TET2	4	106067032	106200973
Epithelial.Epithelial.1.1.1.1	4-region_23	2	PPA2	4	106290234	106395238
Epithelial.Epithelial.1.1.1.1	4-region_23	2	INTS12	4	106603784	106817143
Epithelial.Epithelial.1.1.1.1	4-region_23	2	NPNT	4	106815932	106925184
Epithelial.Epithelial.1.1.1.1	4-region_23	2	TBCK	4	106962756	107242652
Epithelial.Epithelial.1.1.1.1	4-region_23	2	AIMP1	4	107236701	107270383
Epithelial.Epithelial.1.1.1.1	4-region_23	2	PAPSS1	4	108511433	108641608
Epithelial.Epithelial.1.1.1.1	4-region_23	2	SGMS2	4	108745719	108836203
Epithelial.Epithelial.1.1.1.1	4-region_23	2	HADH	4	108910870	108956331
Epithelial.Epithelial.1.1.1.1	4-region_23	2	RPL34	4	109541722	109551568
Epithelial.Epithelial.1.1.1.1	4-region_23	2	OSTC	4	109571740	109588976
Epithelial.Epithelial.1.1.1.1	4-region_23	2	SEC24B	4	110354928	110462052
Epithelial.Epithelial.1.1.1.1	4-region_23	2	CCDC109B	4	110481361	110609874
Epithelial.Epithelial.1.1.1.1	4-region_23	2	CASP6	4	110609785	110624739
Epithelial.Epithelial.1.1.1.1	4-region_23	2	PLA2G12A	4	110631145	110651233
Epithelial.Epithelial.1.1.1.1	4-region_23	2	CFI	4	110661852	110723335
Epithelial.Epithelial.1.1.1.1	4-region_23	2	GAR1	4	110736666	110745893
Epithelial.Epithelial.1.1.1.1	4-region_23	2	ELOVL6	4	110967002	111120355
Epithelial.Epithelial.1.1.1.1	4-region_23	2	C4orf32	4	113066553	113116412
Epithelial.Epithelial.1.1.1.1	4-region_23	2	AP1AR	4	113152893	113191203
Epithelial.Epithelial.1.1.1.1	4-region_23	2	TIFA	4	113195698	113207059
Epithelial.Epithelial.1.1.1.1	4-region_23	2	ALPK1	4	113206665	113363776
Epithelial.Epithelial.1.1.1.1	4-region_23	2	LARP7	4	113558120	113578748
Epithelial.Epithelial.1.1.1.1	4-region_23	2	CAMK2D	4	114372188	114683083
Epithelial.Epithelial.1.1.1.1	4-region_23	2	ARSJ	4	114821440	114900883
Epithelial.Epithelial.1.1.1.1	4-region_23	2	UGT8	4	115519611	115599380
Epithelial.Epithelial.1.1.1.1	4-region_23	2	SNHG8	4	119199864	119200978
Epithelial.Epithelial.1.1.1.1	4-region_23	2	METTL14	4	119606523	119636588
Epithelial.Epithelial.1.1.1.1	4-region_23	2	SEC24D	4	119643978	119759838
Epithelial.Epithelial.1.1.1.1	4-region_23	2	USP53	4	120133742	120216672
Epithelial.Epithelial.1.1.1.1	4-region_23	2	C4orf3	4	120218207	120225600
Epithelial.Epithelial.1.1.1.1	4-region_23	2	MAD2L1	4	120976763	120988229
Epithelial.Epithelial.1.1.1.1	4-region_23	2	NDNF	4	121956768	121994176
Epithelial.Epithelial.1.1.1.1	4-region_23	2	ANXA5	4	122589110	122618268
Epithelial.Epithelial.1.1.1.1	4-region_23	2	EXOSC9	4	122722472	122738176
Epithelial.Epithelial.1.1.1.1	4-region_23	2	CCNA2	4	122737599	122745087
Epithelial.Epithelial.1.1.1.1	4-region_23	2	BBS7	4	122745595	122791652
Epithelial.Epithelial.1.1.1.1	4-region_23	2	KIAA1109	4	123073488	123283913
Epithelial.Epithelial.1.1.1.1	4-region_23	2	SPRY1	4	124317950	124324910
Epithelial.Epithelial.1.1.1.1	4-region_23	2	INTU	4	128544426	128647892
Epithelial.Epithelial.1.1.1.1	4-region_23	2	HSPA4L	4	128702976	128761888
Epithelial.Epithelial.1.1.1.1	4-region_23	2	LARP1B	4	128982423	129144086
Epithelial.Epithelial.1.1.1.1	4-region_23	2	PGRMC2	4	129190397	129209984
Epithelial.Epithelial.1.1.1.1	4-region_23	2	JADE1	4	129730779	129796379
Epithelial.Epithelial.1.1.1.1	4-region_23	2	SCLT1	4	129786076	130014764
Epithelial.Epithelial.1.1.1.1	4-region_23	2	C4orf33	4	130014472	130037795
Epithelial.Epithelial.1.1.1.1	4-region_23	2	SLC7A11	4	139085251	139163503
Epithelial.Epithelial.1.1.1.1	4-region_23	2	ELF2	4	139949266	140098372
Epithelial.Epithelial.1.1.1.1	4-region_23	2	NDUFC1	4	140188034	140223705
Epithelial.Epithelial.1.1.1.1	4-region_23	2	NAA15	4	140222609	140341187
Epithelial.Epithelial.1.1.1.1	4-region_23	2	RP11-83A24.2	4	140333081	140375188
Epithelial.Epithelial.1.1.1.1	4-region_23	2	SETD7	4	140417095	140527853
Epithelial.Epithelial.1.1.1.1	4-region_23	2	MGST2	4	140586922	140661899
Epithelial.Epithelial.1.1.1.1	4-region_23	2	SCOC	4	141178440	141306880
Epithelial.Epithelial.1.1.1.1	4-region_23	2	ELMOD2	4	141445312	141474924
Epithelial.Epithelial.1.1.1.1	4-region_23	2	ZNF330	4	142142041	142155851
Epithelial.Epithelial.1.1.1.1	4-region_23	2	INPP4B	4	142944313	143768585
Epithelial.Epithelial.1.1.1.1	4-region_23	2	USP38	4	144106070	144144983
Epithelial.Epithelial.1.1.1.1	4-region_23	2	SMARCA5	4	144434616	144478639
Epithelial.Epithelial.1.1.1.1	4-region_23	2	ANAPC10	4	145888264	146019693
Epithelial.Epithelial.1.1.1.1	4-region_23	2	ABCE1	4	146019084	146050331
Epithelial.Epithelial.1.1.1.1	4-region_23	2	OTUD4	4	146031990	146101313
Epithelial.Epithelial.1.1.1.1	4-region_23	2	SMAD1	4	146402346	146479231
Epithelial.Epithelial.1.1.1.1	4-region_23	2	ZNF827	4	146678779	146859787
Epithelial.Epithelial.1.1.1.1	4-region_23	2	LSM6	4	147096837	147121152
Epithelial.Epithelial.1.1.1.1	4-region_23	2	TMEM184C	4	148538534	148593195
Epithelial.Epithelial.1.1.1.1	4-region_23	2	ARHGAP10	4	148653214	148993931
Epithelial.Epithelial.1.1.1.1	4-region_23	2	LRBA	4	151185594	151936879
Epithelial.Epithelial.1.1.1.1	4-region_23	2	RPS3A	4	152020725	152025804
Epithelial.Epithelial.1.1.1.1	4-region_23	2	SH3D19	4	152023903	152246784
Epithelial.Epithelial.1.1.1.1	4-region_23	2	FBXW7	4	153242410	153457253
Epithelial.Epithelial.1.1.1.1	4-region_23	2	TMEM154	4	153539784	153601317
Epithelial.Epithelial.1.1.1.1	4-region_23	2	ARFIP1	4	153701089	153839615
Epithelial.Epithelial.1.1.1.1	4-region_23	2	TRIM2	4	154073494	154260472
Epithelial.Epithelial.1.1.1.1	4-region_23	2	PLRG1	4	155456158	155471587
Epithelial.Epithelial.1.1.1.1	4-region_23	2	FGB	4	155484108	155492238
Epithelial.Epithelial.1.1.1.1	4-region_23	2	FGA	4	155504278	155511918
Epithelial.Epithelial.1.1.1.1	4-region_23	2	FGG	4	155525286	155534119
Epithelial.Epithelial.1.1.1.1	4-region_23	2	MAP9	4	156263810	156298122
Epithelial.Epithelial.1.1.1.1	4-region_23	2	CTSO	4	156845270	156875069
Epithelial.Epithelial.1.1.1.1	4-region_23	2	PDGFC	4	157681606	157892546
Epithelial.Epithelial.1.1.1.1	4-region_23	2	TMEM144	4	159122756	159176563
Epithelial.Epithelial.1.1.1.1	4-region_23	2	ETFDH	4	159593277	159630775
Epithelial.Epithelial.1.1.1.1	4-region_23	2	PPID	4	159630286	159644548
Epithelial.Epithelial.1.1.1.1	4-region_23	2	FNIP2	4	159690290	159829201
Epithelial.Epithelial.1.1.1.1	4-region_23	2	RAPGEF2	4	160025330	160281321
Epithelial.Epithelial.1.1.1.1	4-region_23	2	NAF1	4	164031225	164088073
Epithelial.Epithelial.1.1.1.1	4-region_23	2	TMA16	4	164415594	164441691
Epithelial.Epithelial.1.1.1.1	4-region_23	2	TMEM192	4	165995574	166129701
Epithelial.Epithelial.1.1.1.1	4-region_23	2	KLHL2	4	166128770	166244308
Epithelial.Epithelial.1.1.1.1	4-region_23	2	MSMO1	4	166248775	166264312
Epithelial.Epithelial.1.1.1.1	4-region_23	2	ANXA10	4	169013666	169108841
Epithelial.Epithelial.1.1.1.1	4-region_23	2	DDX60	4	169137444	169239958
Epithelial.Epithelial.1.1.1.1	4-region_23	2	DDX60L	4	169277886	169458937
Epithelial.Epithelial.1.1.1.1	4-region_23	2	PALLD	4	169418217	169849608
Epithelial.Epithelial.1.1.1.1	4-region_23	2	CBR4	4	169784921	169931426
Epithelial.Epithelial.1.1.1.1	4-region_23	2	SH3RF1	4	170015407	170192256
Epithelial.Epithelial.1.1.1.1	4-region_23	2	NEK1	4	170314426	170533780
Epithelial.Epithelial.1.1.1.1	4-region_23	2	CLCN3	4	170533784	170644824
Epithelial.Epithelial.1.1.1.1	4-region_23	2	C4orf27	4	170650616	170679104
Epithelial.Epithelial.1.1.1.1	4-region_23	2	GALNT7	4	174089904	174245118
Epithelial.Epithelial.1.1.1.1	4-region_23	2	HMGB2	4	174252846	174256276
Epithelial.Epithelial.1.1.1.1	4-region_23	2	FBXO8	4	175157809	175205415
Epithelial.Epithelial.1.1.1.1	4-region_23	2	CEP44	4	175204828	175254531
Epithelial.Epithelial.1.1.1.1	4-region_23	2	HPGD	4	175411328	175444305
Epithelial.Epithelial.1.1.1.1	4-region_23	2	SPCS3	4	177241115	177253396
Epithelial.Epithelial.1.1.1.1	4-region_23	2	AGA	4	178351924	178363657
Epithelial.Epithelial.1.1.1.1	4-region_23	2	DCTD	4	183811213	183839089
Epithelial.Epithelial.1.1.1.1	4-region_23	2	WWC2	4	184020446	184241930
Epithelial.Epithelial.1.1.1.1	4-region_23	2	CDKN2AIP	4	184365744	184369351
Epithelial.Epithelial.1.1.1.1	4-region_23	2	ING2	4	184426147	184432249
Epithelial.Epithelial.1.1.1.1	4-region_23	2	RWDD4	4	184560788	184580378
Epithelial.Epithelial.1.1.1.1	4-region_23	2	TRAPPC11	4	184580420	184634745
Epithelial.Epithelial.1.1.1.1	4-region_23	2	IRF2	4	185308867	185395734
Epithelial.Epithelial.1.1.1.1	4-region_23	2	CASP3	4	185548850	185570663
Epithelial.Epithelial.1.1.1.1	4-region_23	2	CENPU	4	185615772	185655287
Epithelial.Epithelial.1.1.1.1	4-region_23	2	SLC25A4	4	186064395	186071536
Epithelial.Epithelial.1.1.1.1	4-region_23	2	KIAA1430	4	186080819	186130658
Epithelial.Epithelial.1.1.1.1	4-region_23	2	ANKRD37	4	186317175	186321782
Epithelial.Epithelial.1.1.1.1	4-region_23	2	UFSP2	4	186320694	186347139
Epithelial.Epithelial.1.1.1.1	4-region_23	2	SORBS2	4	186506598	186877806
Epithelial.Epithelial.1.1.1.1	4-region_23	2	TLR3	4	186990306	187009223
Epithelial.Epithelial.1.1.1.1	4-region_23	2	CYP4V2	4	187112674	187134610
Epithelial.Epithelial.1.1.1.1	4-region_23	2	FAT1	4	187508937	187647876
Epithelial.Epithelial.1.1.1.1	4-region_23	2	FRG1	4	190861943	190884359
Epithelial.Epithelial.1.1.1.1	5-region_25	2	PDCD6	5	271736	353971
Epithelial.Epithelial.1.1.1.1	5-region_25	2	EXOC3	5	443273	472052
Epithelial.Epithelial.1.1.1.1	5-region_25	2	BRD9	5	850406	892939
Epithelial.Epithelial.1.1.1.1	5-region_25	2	SLC12A7	5	1050499	1112150
Epithelial.Epithelial.1.1.1.1	5-region_25	2	CLPTM1L	5	1317859	1345214
Epithelial.Epithelial.1.1.1.1	5-region_25	2	LPCAT1	5	1456595	1524092
Epithelial.Epithelial.1.1.1.1	5-region_25	2	MRPL36	5	1798500	1801480
Epithelial.Epithelial.1.1.1.1	5-region_25	2	NDUFS6	5	1801514	1816719
Epithelial.Epithelial.1.1.1.1	5-region_25	2	KIAA0947	5	5420777	5490347
Epithelial.Epithelial.1.1.1.1	5-region_25	2	MED10	5	6371994	6378707
Epithelial.Epithelial.1.1.1.1	5-region_25	2	NSUN2	5	6599352	6633404
Epithelial.Epithelial.1.1.1.1	5-region_25	2	SRD5A1	5	6633456	6669675
Epithelial.Epithelial.1.1.1.1	5-region_25	2	MTRR	5	7851299	7906138
Epithelial.Epithelial.1.1.1.1	5-region_25	2	MIR4458HG	5	8450856	8463208
Epithelial.Epithelial.1.1.1.1	5-region_25	2	CCT5	5	10250033	10266524
Epithelial.Epithelial.1.1.1.1	5-region_25	2	CMBL	5	10275987	10308138
Epithelial.Epithelial.1.1.1.1	5-region_25	2	2024-03-06	5	10353815	10440500
Epithelial.Epithelial.1.1.1.1	5-region_25	2	DAP	5	10679342	10761384
Epithelial.Epithelial.1.1.1.1	5-region_25	2	TRIO	5	14143811	14532235
Epithelial.Epithelial.1.1.1.1	5-region_25	2	FAM105B	5	14664773	14699820
Epithelial.Epithelial.1.1.1.1	5-region_25	2	ANKH	5	14704910	14871887
Epithelial.Epithelial.1.1.1.1	5-region_25	2	ZNF622	5	16451628	16465901
Epithelial.Epithelial.1.1.1.1	5-region_25	2	MYO10	5	16665395	16936372
Epithelial.Epithelial.1.1.1.1	5-region_25	2	DROSHA	5	31400604	31532303
Epithelial.Epithelial.1.1.1.1	5-region_25	2	C5orf22	5	31532373	31555165
Epithelial.Epithelial.1.1.1.1	5-region_25	2	GOLPH3	5	32124810	32174456
Epithelial.Epithelial.1.1.1.1	5-region_25	2	MTMR12	5	32227100	32313115
Epithelial.Epithelial.1.1.1.1	5-region_25	2	ZFR	5	32354456	32444867
Epithelial.Epithelial.1.1.1.1	5-region_25	2	SUB1	5	32531739	32604185
Epithelial.Epithelial.1.1.1.1	5-region_25	2	TARS	5	33440802	33469644
Epithelial.Epithelial.1.1.1.1	5-region_25	2	RAI14	5	34656342	34832732
Epithelial.Epithelial.1.1.1.1	5-region_25	2	RAD1	5	34905369	34919094
Epithelial.Epithelial.1.1.1.1	5-region_25	2	BRIX1	5	34915481	34926101
Epithelial.Epithelial.1.1.1.1	5-region_25	2	DNAJC21	5	34929698	34959069
Epithelial.Epithelial.1.1.1.1	5-region_25	2	IL7R	5	35852797	35879705
Epithelial.Epithelial.1.1.1.1	5-region_25	2	LMBRD2	5	36098514	36152063
Epithelial.Epithelial.1.1.1.1	5-region_25	2	NADK2	5	36192694	36242381
Epithelial.Epithelial.1.1.1.1	5-region_25	2	NIPBL	5	36876861	37066515
Epithelial.Epithelial.1.1.1.1	5-region_25	2	C5orf42	5	37106330	37249530
Epithelial.Epithelial.1.1.1.1	5-region_25	2	NUP155	5	37288239	37371283
Epithelial.Epithelial.1.1.1.1	5-region_25	2	WDR70	5	37379314	37753537
Epithelial.Epithelial.1.1.1.1	5-region_25	2	OSMR	5	38845960	38945698
Epithelial.Epithelial.1.1.1.1	5-region_25	2	RICTOR	5	38938021	39074510
Epithelial.Epithelial.1.1.1.1	5-region_25	2	FYB	5	39105338	39274630
Epithelial.Epithelial.1.1.1.1	5-region_25	2	DAB2	5	39371780	39462402
Epithelial.Epithelial.1.1.1.1	5-region_25	2	PRKAA1	5	40759481	40798476
Epithelial.Epithelial.1.1.1.1	5-region_25	2	RPL37	5	40825364	40835437
Epithelial.Epithelial.1.1.1.1	5-region_25	2	CARD6	5	40841286	40860275
Epithelial.Epithelial.1.1.1.1	5-region_25	2	C5orf51	5	41904290	41921738
Epithelial.Epithelial.1.1.1.1	5-region_25	2	FBXO4	5	41925356	41941845
Epithelial.Epithelial.1.1.1.1	5-region_25	2	SEPP1	5	42799982	42887494
Epithelial.Epithelial.1.1.1.1	5-region_25	2	ZNF131	5	43065278	43192123
Epithelial.Epithelial.1.1.1.1	5-region_25	2	HMGCS1	5	43289497	43313614
Epithelial.Epithelial.1.1.1.1	5-region_25	2	CCL28	5	43376747	43412493
Epithelial.Epithelial.1.1.1.1	5-region_25	2	C5orf28	5	43444354	43483995
Epithelial.Epithelial.1.1.1.1	5-region_25	2	PAIP1	5	43526369	43557860
Epithelial.Epithelial.1.1.1.1	5-region_25	2	NNT-AS1	5	43571696	43603332
Epithelial.Epithelial.1.1.1.1	5-region_25	2	NNT	5	43602794	43707507
Epithelial.Epithelial.1.1.1.1	5-region_25	2	RP11-53O19.1	5	44745002	44808879
Epithelial.Epithelial.1.1.1.1	5-region_25	2	MRPS30	5	44809027	44820530
Epithelial.Epithelial.1.1.1.1	5-region_25	2	EMB	5	49692026	49739082
Epithelial.Epithelial.1.1.1.1	5-region_25	2	PARP8	5	49961733	50142356
Epithelial.Epithelial.1.1.1.1	5-region_25	2	ITGA1	5	52083730	52255040
Epithelial.Epithelial.1.1.1.1	5-region_25	2	PELO	5	52083774	52099880
Epithelial.Epithelial.1.1.1.1	5-region_25	2	ITGA2	5	52285156	52390609
Epithelial.Epithelial.1.1.1.1	5-region_25	2	MOCS2	5	52391509	52405893
Epithelial.Epithelial.1.1.1.1	5-region_25	2	NDUFS4	5	52856463	52979168
Epithelial.Epithelial.1.1.1.1	5-region_25	2	SNX18	5	53813589	53842415
Epithelial.Epithelial.1.1.1.1	5-region_25	2	GZMK	5	54320081	54330398
Epithelial.Epithelial.1.1.1.1	5-region_25	2	GZMA	5	54398476	54406080
Epithelial.Epithelial.1.1.1.1	5-region_25	2	GPX8	5	54455946	54462899
Epithelial.Epithelial.1.1.1.1	5-region_25	2	CCNO	5	54526980	54529508
Epithelial.Epithelial.1.1.1.1	5-region_25	2	DHX29	5	54552073	54603550
Epithelial.Epithelial.1.1.1.1	5-region_25	2	SKIV2L2	5	54603588	54721409
Epithelial.Epithelial.1.1.1.1	5-region_25	2	SLC38A9	5	54921673	55069022
Epithelial.Epithelial.1.1.1.1	5-region_25	2	IL6ST	5	55230923	55290821
Epithelial.Epithelial.1.1.1.1	5-region_25	2	MAP3K1	5	56111401	56191979
Epithelial.Epithelial.1.1.1.1	5-region_25	2	SETD9	5	56205087	56221359
Epithelial.Epithelial.1.1.1.1	5-region_25	2	GPBP1	5	56469775	56560506
Epithelial.Epithelial.1.1.1.1	5-region_25	2	PLK2	5	57749809	57756087
Epithelial.Epithelial.1.1.1.1	5-region_25	2	NDUFAF2	5	60240956	60448853
Epithelial.Epithelial.1.1.1.1	5-region_25	2	SMIM15	5	60453536	60458301
Epithelial.Epithelial.1.1.1.1	5-region_25	2	ZSWIM6	5	60628100	60841997
Epithelial.Epithelial.1.1.1.1	5-region_25	2	KIF2A	5	61601989	61833076
Epithelial.Epithelial.1.1.1.1	5-region_25	2	DIMT1	5	61683081	61699766
Epithelial.Epithelial.1.1.1.1	5-region_25	2	SREK1IP1	5	64013971	64064512
Epithelial.Epithelial.1.1.1.1	5-region_25	2	CWC27	5	64064757	64314590
Epithelial.Epithelial.1.1.1.1	5-region_25	2	CENPK	5	64813593	64858998
Epithelial.Epithelial.1.1.1.1	5-region_25	2	PPWD1	5	64859063	64883376
Epithelial.Epithelial.1.1.1.1	5-region_25	2	TRAPPC13	5	64920543	64962060
Epithelial.Epithelial.1.1.1.1	5-region_25	2	NLN	5	65018023	65167553
Epithelial.Epithelial.1.1.1.1	5-region_25	2	ERBB2IP	5	65222303	65378377
Epithelial.Epithelial.1.1.1.1	5-region_25	2	SNORA76	5	65257011	65257147
Epithelial.Epithelial.1.1.1.1	5-region_25	2	SREK1	5	65435799	65479443
Epithelial.Epithelial.1.1.1.1	5-region_25	2	MAST4	5	65892176	66465423
Epithelial.Epithelial.1.1.1.1	5-region_25	2	PIK3R1	5	67511548	67597649
Epithelial.Epithelial.1.1.1.1	5-region_25	2	SLC30A5	5	68389473	68426896
Epithelial.Epithelial.1.1.1.1	5-region_25	2	CCNB1	5	68462837	68474072
Epithelial.Epithelial.1.1.1.1	5-region_25	2	CENPH	5	68485375	68506184
Epithelial.Epithelial.1.1.1.1	5-region_25	2	MRPS36	5	68513587	68525956
Epithelial.Epithelial.1.1.1.1	5-region_25	2	CDK7	5	68530668	68573250
Epithelial.Epithelial.1.1.1.1	5-region_25	2	CCDC125	5	68576002	68628636
Epithelial.Epithelial.1.1.1.1	5-region_25	2	TAF9	5	68646811	68665840
Epithelial.Epithelial.1.1.1.1	5-region_25	2	RAD17	5	68665120	68710628
Epithelial.Epithelial.1.1.1.1	5-region_25	2	MARVELD2	5	68710939	68740157
Epithelial.Epithelial.1.1.1.1	5-region_25	2	OCLN	5	68788119	68853931
Epithelial.Epithelial.1.1.1.1	5-region_25	2	GTF2H2	5	70330784	70363516
Epithelial.Epithelial.1.1.1.1	5-region_25	2	BDP1	5	70751442	70863649
Epithelial.Epithelial.1.1.1.1	5-region_25	2	MCCC2	5	70883115	70954531
Epithelial.Epithelial.1.1.1.1	5-region_25	2	MAP1B	5	71403061	71505395
Epithelial.Epithelial.1.1.1.1	5-region_25	2	MRPS27	5	71515236	71616473
Epithelial.Epithelial.1.1.1.1	5-region_25	2	TNPO1	5	72112139	72212560
Epithelial.Epithelial.1.1.1.1	5-region_25	2	FCHO2	5	72251808	72386349
Epithelial.Epithelial.1.1.1.1	5-region_25	2	TMEM171	5	72416119	72427644
Epithelial.Epithelial.1.1.1.1	5-region_25	2	FOXD1	5	72740654	72744352
Epithelial.Epithelial.1.1.1.1	5-region_25	2	BTF3	5	72794233	72801460
Epithelial.Epithelial.1.1.1.1	5-region_25	2	ANKRA2	5	72848160	72861511
Epithelial.Epithelial.1.1.1.1	5-region_25	2	ARHGEF28	5	72921983	73237818
Epithelial.Epithelial.1.1.1.1	5-region_25	2	ENC1	5	73923234	73937249
Epithelial.Epithelial.1.1.1.1	5-region_25	2	HEXB	5	73935848	74018472
Epithelial.Epithelial.1.1.1.1	5-region_25	2	GFM2	5	74017029	74063196
Epithelial.Epithelial.1.1.1.1	5-region_25	2	NSA2	5	74062817	74072737
Epithelial.Epithelial.1.1.1.1	5-region_25	2	HMGCR	5	74632154	74657929
Epithelial.Epithelial.1.1.1.1	5-region_25	2	COL4A3BP	5	74664311	74807963
Epithelial.Epithelial.1.1.1.1	5-region_25	2	POLK	5	74807581	74896969
Epithelial.Epithelial.1.1.1.1	5-region_25	2	POC5	5	74969949	75013313
Epithelial.Epithelial.1.1.1.1	5-region_25	2	IQGAP2	5	75699074	76003957
Epithelial.Epithelial.1.1.1.1	5-region_25	2	F2RL1	5	76114758	76131140
Epithelial.Epithelial.1.1.1.1	5-region_25	2	AGGF1	5	76325076	76361059
Epithelial.Epithelial.1.1.1.1	5-region_25	2	WDR41	5	76721795	76916436
Epithelial.Epithelial.1.1.1.1	5-region_25	2	TBCA	5	76986991	77164604
Epithelial.Epithelial.1.1.1.1	5-region_25	2	AP3B1	5	77296349	77590579
Epithelial.Epithelial.1.1.1.1	5-region_25	2	SCAMP1	5	77656339	77776562
Epithelial.Epithelial.1.1.1.1	5-region_25	2	LHFPL2	5	77781038	78065844
Epithelial.Epithelial.1.1.1.1	5-region_25	2	JMY	5	78532012	78623038
Epithelial.Epithelial.1.1.1.1	5-region_25	2	HOMER1	5	78668459	78810040
Epithelial.Epithelial.1.1.1.1	5-region_25	2	PAPD4	5	78907943	78982471
Epithelial.Epithelial.1.1.1.1	5-region_25	2	SERINC5	5	79407050	79551898
Epithelial.Epithelial.1.1.1.1	5-region_25	2	ZFYVE16	5	79703832	79775169
Epithelial.Epithelial.1.1.1.1	5-region_25	2	CTD-2015H6.3	5	79778112	79783882
Epithelial.Epithelial.1.1.1.1	5-region_25	2	DHFR	5	79922047	79950802
Epithelial.Epithelial.1.1.1.1	5-region_25	2	MSH3	5	79950467	80172279
Epithelial.Epithelial.1.1.1.1	5-region_25	2	ZCCHC9	5	80597409	80609116
Epithelial.Epithelial.1.1.1.1	5-region_25	2	SSBP2	5	80708840	81047616
Epithelial.Epithelial.1.1.1.1	5-region_25	2	ATG10	5	81267844	81572676
Epithelial.Epithelial.1.1.1.1	5-region_25	2	RPS23	5	81569177	81574396
Epithelial.Epithelial.1.1.1.1	5-region_25	2	TMEM167A	5	82348665	82373682
Epithelial.Epithelial.1.1.1.1	5-region_25	2	XRCC4	5	82373317	82649606
Epithelial.Epithelial.1.1.1.1	5-region_25	2	COX7C	5	85913721	85916779
Epithelial.Epithelial.1.1.1.1	5-region_25	2	RASA1	5	86563705	86687748
Epithelial.Epithelial.1.1.1.1	5-region_25	2	CCNH	5	86687311	86708836
Epithelial.Epithelial.1.1.1.1	5-region_25	2	TMEM161B	5	87485450	87565293
Epithelial.Epithelial.1.1.1.1	5-region_25	2	TMEM161B-AS1	5	87564712	87732502
Epithelial.Epithelial.1.1.1.1	5-region_25	2	CETN3	5	89688078	89705603
Epithelial.Epithelial.1.1.1.1	5-region_25	2	LYSMD3	5	89811428	89825401
Epithelial.Epithelial.1.1.1.1	5-region_25	2	ARRDC3	5	90664541	90679176
Epithelial.Epithelial.1.1.1.1	5-region_25	2	FAM172A	5	92953775	93447404
Epithelial.Epithelial.1.1.1.1	5-region_25	2	TTC37	5	94799599	94890711
Epithelial.Epithelial.1.1.1.1	5-region_25	2	RHOBTB3	5	95049226	95160087
Epithelial.Epithelial.1.1.1.1	5-region_25	2	GLRX	5	95087023	95158709
Epithelial.Epithelial.1.1.1.1	5-region_25	2	ELL2	5	95220802	95297775
Epithelial.Epithelial.1.1.1.1	5-region_25	2	CAST	5	95860971	96115299
Epithelial.Epithelial.1.1.1.1	5-region_25	2	ERAP1	5	96096521	96143803
Epithelial.Epithelial.1.1.1.1	5-region_25	2	ERAP2	5	96211643	96255420
Epithelial.Epithelial.1.1.1.1	5-region_25	2	LNPEP	5	96271098	96373219
Epithelial.Epithelial.1.1.1.1	5-region_25	2	RIOK2	5	96496571	96518964
Epithelial.Epithelial.1.1.1.1	5-region_25	2	CHD1	5	98190908	98262240
Epithelial.Epithelial.1.1.1.1	5-region_25	2	FAM174A	5	99871009	99922445
Epithelial.Epithelial.1.1.1.1	5-region_25	2	PAM	5	102089685	102366809
Epithelial.Epithelial.1.1.1.1	5-region_25	2	PPIP5K2	5	102455853	102548500
Epithelial.Epithelial.1.1.1.1	5-region_25	2	EFNA5	5	106712590	107006596
Epithelial.Epithelial.1.1.1.1	5-region_25	2	FBXL17	5	107194736	107717799
Epithelial.Epithelial.1.1.1.1	5-region_25	2	FER	5	108083523	108532542
Epithelial.Epithelial.1.1.1.1	5-region_25	2	PJA2	5	108670410	108745695
Epithelial.Epithelial.1.1.1.1	5-region_25	2	MAN2A1	5	109025067	109205326
Epithelial.Epithelial.1.1.1.1	5-region_25	2	SLC25A46	5	110073837	110100857
Epithelial.Epithelial.1.1.1.1	5-region_25	2	WDR36	5	110427414	110466200
Epithelial.Epithelial.1.1.1.1	5-region_25	2	EPB41L4A-AS1	5	111496223	111499973
Epithelial.Epithelial.1.1.1.1	5-region_25	2	APC	5	112043195	112181936
Epithelial.Epithelial.1.1.1.1	5-region_25	2	SRP19	5	112196919	112205485
Epithelial.Epithelial.1.1.1.1	5-region_25	2	REEP5	5	112212084	112258236
Epithelial.Epithelial.1.1.1.1	5-region_25	2	DCP2	5	112312399	112356667
Epithelial.Epithelial.1.1.1.1	5-region_25	2	MCC	5	112357796	112824527
Epithelial.Epithelial.1.1.1.1	5-region_25	2	YTHDC2	5	112849380	112930982
Epithelial.Epithelial.1.1.1.1	5-region_25	2	PGGT1B	5	114546527	114598569
Epithelial.Epithelial.1.1.1.1	5-region_25	2	CCDC112	5	114602885	114632528
Epithelial.Epithelial.1.1.1.1	5-region_25	2	FEM1C	5	114856608	114880591
Epithelial.Epithelial.1.1.1.1	5-region_25	2	TMED7	5	114949205	114968689
Epithelial.Epithelial.1.1.1.1	5-region_25	2	ATG12	5	115163893	115177555
Epithelial.Epithelial.1.1.1.1	5-region_27	4	SKP1	5	133484633	133512729
Epithelial.Epithelial.1.1.1.1	5-region_27	4	PPP2CA	5	133530025	133561833
Epithelial.Epithelial.1.1.1.1	5-region_27	4	UBE2B	5	133706870	133727683
Epithelial.Epithelial.1.1.1.1	5-region_27	4	CDKN2AIPNL	5	133737778	133747589
Epithelial.Epithelial.1.1.1.1	5-region_27	4	JADE2	5	133860003	133918918
Epithelial.Epithelial.1.1.1.1	5-region_27	4	SAR1B	5	133936834	133984961
Epithelial.Epithelial.1.1.1.1	5-region_27	4	SEC24A	5	133984479	134063513
Epithelial.Epithelial.1.1.1.1	5-region_27	4	CAMLG	5	134074191	134087847
Epithelial.Epithelial.1.1.1.1	5-region_27	4	DDX46	5	134094469	134190823
Epithelial.Epithelial.1.1.1.1	5-region_27	4	C5orf24	5	134181370	134195427
Epithelial.Epithelial.1.1.1.1	5-region_27	4	TXNDC15	5	134209493	134237215
Epithelial.Epithelial.1.1.1.1	5-region_27	4	PCBD2	5	134240596	134343649
Epithelial.Epithelial.1.1.1.1	5-region_27	4	PITX1	5	134363425	134370503
Epithelial.Epithelial.1.1.1.1	5-region_27	4	H2AFY	5	134669590	134735604
Epithelial.Epithelial.1.1.1.1	5-region_27	4	CXCL14	5	134906373	134914969
Epithelial.Epithelial.1.1.1.1	5-region_27	4	TGFBI	5	135364584	135399507
Epithelial.Epithelial.1.1.1.1	5-region_27	4	SMAD5	5	135468534	135524435
Epithelial.Epithelial.1.1.1.1	5-region_27	4	HNRNPA0	5	137087075	137090039
Epithelial.Epithelial.1.1.1.1	5-region_27	4	FAM13B	5	137273649	137387650
Epithelial.Epithelial.1.1.1.1	5-region_27	4	BRD8	5	137475455	137514675
Epithelial.Epithelial.1.1.1.1	5-region_27	4	CDC23	5	137523339	137549032
Epithelial.Epithelial.1.1.1.1	5-region_27	4	FAM53C	5	137667624	137685416
Epithelial.Epithelial.1.1.1.1	5-region_27	4	KDM3B	5	137688285	137772717
Epithelial.Epithelial.1.1.1.1	5-region_27	4	EGR1	5	137801179	137805004
Epithelial.Epithelial.1.1.1.1	5-region_27	4	ETF1	5	137841784	137878989
Epithelial.Epithelial.1.1.1.1	5-region_27	4	HSPA9	5	137890571	137911133
Epithelial.Epithelial.1.1.1.1	5-region_27	4	CTNNA1	5	137946656	138270723
Epithelial.Epithelial.1.1.1.1	5-region_27	4	SIL1	5	138282409	138629246
Epithelial.Epithelial.1.1.1.1	5-region_27	4	MATR3	5	138609441	138667360
Epithelial.Epithelial.1.1.1.1	5-region_27	4	PAIP2	5	138677276	138705406
Epithelial.Epithelial.1.1.1.1	5-region_27	4	TMEM173	5	138855119	138862520
Epithelial.Epithelial.1.1.1.1	5-region_27	4	UBE2D2	5	138906016	139008018
Epithelial.Epithelial.1.1.1.1	5-region_27	4	CXXC5	5	139026884	139063467
Epithelial.Epithelial.1.1.1.1	5-region_27	4	PURA	5	139487362	139496321
Epithelial.Epithelial.1.1.1.1	5-region_27	4	CYSTM1	5	139554227	139661637
Epithelial.Epithelial.1.1.1.1	5-region_27	4	PFDN1	5	139624624	139682706
Epithelial.Epithelial.1.1.1.1	5-region_27	4	HBEGF	5	139712428	139726216
Epithelial.Epithelial.1.1.1.1	5-region_27	4	SRA1	5	139916925	139937895
Epithelial.Epithelial.1.1.1.1	5-region_29	2	RPS14	5	149822753	149829319
Epithelial.Epithelial.1.1.1.1	5-region_29	2	NDST1	5	149865381	149937773
Epithelial.Epithelial.1.1.1.1	5-region_29	2	SYNPO	5	149980642	150038782
Epithelial.Epithelial.1.1.1.1	5-region_29	2	RBM22	5	150070356	150080669
Epithelial.Epithelial.1.1.1.1	5-region_29	2	DCTN4	5	150088002	150138671
Epithelial.Epithelial.1.1.1.1	5-region_29	2	SMIM3	5	150157508	150176296
Epithelial.Epithelial.1.1.1.1	5-region_29	2	GPX3	5	150400124	150408554
Epithelial.Epithelial.1.1.1.1	5-region_29	2	TNIP1	5	150409506	150473138
Epithelial.Epithelial.1.1.1.1	5-region_29	2	ANXA6	5	150480273	150537443
Epithelial.Epithelial.1.1.1.1	5-region_29	2	GM2A	5	150591711	150650001
Epithelial.Epithelial.1.1.1.1	5-region_29	2	ATOX1	5	151121877	151152093
Epithelial.Epithelial.1.1.1.1	5-region_29	2	G3BP1	5	151150606	151192346
Epithelial.Epithelial.1.1.1.1	5-region_29	2	FAM114A2	5	153369688	153418496
Epithelial.Epithelial.1.1.1.1	5-region_29	2	GALNT10	5	153570290	153800544
Epithelial.Epithelial.1.1.1.1	5-region_29	2	LARP1	5	154092462	154197167
Epithelial.Epithelial.1.1.1.1	5-region_29	2	FAXDC2	5	154198051	154238812
Epithelial.Epithelial.1.1.1.1	5-region_29	2	CNOT8	5	154237113	154256353
Epithelial.Epithelial.1.1.1.1	5-region_29	2	MRPL22	5	154320630	154348971
Epithelial.Epithelial.1.1.1.1	5-region_29	2	MED7	5	156564423	156586030
Epithelial.Epithelial.1.1.1.1	5-region_29	2	ADAM19	5	156822542	157002783
Epithelial.Epithelial.1.1.1.1	5-region_29	2	THG1L	5	157158205	157168456
Epithelial.Epithelial.1.1.1.1	5-region_29	2	CLINT1	5	157212751	157286183
Epithelial.Epithelial.1.1.1.1	5-region_29	2	RNF145	5	158584417	158637061
Epithelial.Epithelial.1.1.1.1	5-region_29	2	UBLCP1	5	158690089	158713044
Epithelial.Epithelial.1.1.1.1	5-region_29	2	TTC1	5	159436120	159492550
Epithelial.Epithelial.1.1.1.1	5-region_29	2	PWWP2A	5	159488808	159546430
Epithelial.Epithelial.1.1.1.1	5-region_29	2	FABP6	5	159614374	159665742
Epithelial.Epithelial.1.1.1.1	5-region_29	2	SLU7	5	159828648	159848718
Epithelial.Epithelial.1.1.1.1	5-region_29	2	PTTG1	5	159848829	159855748
Epithelial.Epithelial.1.1.1.1	5-region_29	2	CCNG1	5	162864575	162873157
Epithelial.Epithelial.1.1.1.1	5-region_29	2	NUDCD2	5	162873532	162887146
Epithelial.Epithelial.1.1.1.1	5-region_29	2	HMMR	5	162887209	162918947
Epithelial.Epithelial.1.1.1.1	5-region_29	2	MAT2B	5	162930120	162946342
Epithelial.Epithelial.1.1.1.1	5-region_29	2	WWC1	5	167718656	167899308
Epithelial.Epithelial.1.1.1.1	5-region_29	2	RARS	5	167913450	167946304
Epithelial.Epithelial.1.1.1.1	5-region_29	2	PANK3	5	167975500	168006605
Epithelial.Epithelial.1.1.1.1	5-region_29	2	SPDL1	5	169010638	169031782
Epithelial.Epithelial.1.1.1.1	5-region_29	2	LCP2	5	169673241	169725231
Epithelial.Epithelial.1.1.1.1	5-region_29	2	GABRP	5	170190354	170241051
Epithelial.Epithelial.1.1.1.1	5-region_29	2	NPM1	5	170814120	170838141
Epithelial.Epithelial.1.1.1.1	5-region_29	2	FBXW11	5	171288553	171433877
Epithelial.Epithelial.1.1.1.1	6-region_31	2	DUSP22	6	291630	351355
Epithelial.Epithelial.1.1.1.1	6-region_31	2	FOXQ1	6	1312675	1314992
Epithelial.Epithelial.1.1.1.1	6-region_31	2	FOXC1	6	1610681	1614127
Epithelial.Epithelial.1.1.1.1	6-region_31	2	GMDS	6	1624041	2245926
Epithelial.Epithelial.1.1.1.1	6-region_31	2	WRNIP1	6	2765648	2787186
Epithelial.Epithelial.1.1.1.1	6-region_31	2	SERPINB1	6	2832566	2842240
Epithelial.Epithelial.1.1.1.1	6-region_31	2	SERPINB9	6	2887500	2903514
Epithelial.Epithelial.1.1.1.1	6-region_31	2	SERPINB6	6	2948393	2972090
Epithelial.Epithelial.1.1.1.1	6-region_31	2	NQO2	6	2988221	3019996
Epithelial.Epithelial.1.1.1.1	6-region_31	2	RIPK1	6	3064225	3115421
Epithelial.Epithelial.1.1.1.1	6-region_31	2	BPHL	6	3118608	3153812
Epithelial.Epithelial.1.1.1.1	6-region_31	2	TUBB2A	6	3153903	3157760
Epithelial.Epithelial.1.1.1.1	6-region_31	2	TUBB2B	6	3224495	3231964
Epithelial.Epithelial.1.1.1.1	6-region_31	2	PSMG4	6	3231637	3303607
Epithelial.Epithelial.1.1.1.1	6-region_31	2	PXDC1	6	3722848	3752260
Epithelial.Epithelial.1.1.1.1	6-region_31	2	PRPF4B	6	4021501	4065217
Epithelial.Epithelial.1.1.1.1	6-region_31	2	ECI2	6	4115923	4135831
Epithelial.Epithelial.1.1.1.1	6-region_31	2	CDYL	6	4706393	4955785
Epithelial.Epithelial.1.1.1.1	6-region_31	2	LYRM4	6	5102827	5261172
Epithelial.Epithelial.1.1.1.1	6-region_31	2	RREB1	6	7107830	7252213
Epithelial.Epithelial.1.1.1.1	6-region_31	2	SSR1	6	7268539	7347679
Epithelial.Epithelial.1.1.1.1	6-region_31	2	RIOK1	6	7389729	7418270
Epithelial.Epithelial.1.1.1.1	6-region_31	2	DSP	6	7541808	7586950
Epithelial.Epithelial.1.1.1.1	6-region_31	2	SNRNP48	6	7590432	7612200
Epithelial.Epithelial.1.1.1.1	6-region_31	2	EEF1E1	6	8073593	8102811
Epithelial.Epithelial.1.1.1.1	6-region_31	2	SLC35B3	6	8413301	8435794
Epithelial.Epithelial.1.1.1.1	6-region_31	2	TFAP2A	6	10393419	10419892
Epithelial.Epithelial.1.1.1.1	6-region_31	2	GCNT2	6	10492456	10629601
Epithelial.Epithelial.1.1.1.1	6-region_31	2	PAK1IP1	6	10694928	10710015
Epithelial.Epithelial.1.1.1.1	6-region_31	2	TMEM14C	6	10723148	10731362
Epithelial.Epithelial.1.1.1.1	6-region_31	2	TMEM14B	6	10747992	10852986
Epithelial.Epithelial.1.1.1.1	6-region_31	2	NEDD9	6	11183531	11382581
Epithelial.Epithelial.1.1.1.1	6-region_31	2	EDN1	6	12290596	12297427
Epithelial.Epithelial.1.1.1.1	6-region_31	2	TBC1D7	6	13266774	13328815
Epithelial.Epithelial.1.1.1.1	6-region_31	2	NOL7	6	13615559	13632971
Epithelial.Epithelial.1.1.1.1	6-region_31	2	RANBP9	6	13621730	13711796
Epithelial.Epithelial.1.1.1.1	6-region_31	2	MCUR1	6	13786789	13814800
Epithelial.Epithelial.1.1.1.1	6-region_31	2	JARID2	6	15246527	15522252
Epithelial.Epithelial.1.1.1.1	6-region_31	2	DTNBP1	6	15523032	15663289
Epithelial.Epithelial.1.1.1.1	6-region_31	2	MYLIP	6	16129356	16148479
Epithelial.Epithelial.1.1.1.1	6-region_31	2	ATXN1	6	16299343	16761722
Epithelial.Epithelial.1.1.1.1	6-region_31	2	FAM8A1	6	17600586	17611950
Epithelial.Epithelial.1.1.1.1	6-region_31	2	NUP153	6	17615269	17706656
Epithelial.Epithelial.1.1.1.1	6-region_31	2	TPMT	6	18128542	18155305
Epithelial.Epithelial.1.1.1.1	6-region_31	2	DEK	6	18224099	18265054
Epithelial.Epithelial.1.1.1.1	6-region_31	2	MBOAT1	6	20100935	20212670
Epithelial.Epithelial.1.1.1.1	6-region_31	2	E2F3	6	20402398	20493941
Epithelial.Epithelial.1.1.1.1	6-region_31	2	SOX4	6	21593972	21598847
Epithelial.Epithelial.1.1.1.1	6-region_31	2	MRS2	6	24403153	24425810
Epithelial.Epithelial.1.1.1.1	6-region_31	2	TDP2	6	24650205	24667261
Epithelial.Epithelial.1.1.1.1	6-region_31	2	ACOT13	6	24667263	24705293
Epithelial.Epithelial.1.1.1.1	6-region_31	2	C6orf62	6	24705089	24721064
Epithelial.Epithelial.1.1.1.1	6-region_31	2	GMNN	6	24775159	24786327
Epithelial.Epithelial.1.1.1.1	6-region_33	2	GCLC	6	53362139	53481768
Epithelial.Epithelial.1.1.1.1	6-region_33	2	LRRC1	6	53659295	53788919
Epithelial.Epithelial.1.1.1.1	6-region_33	2	DST	6	56322785	56819426
Epithelial.Epithelial.1.1.1.1	6-region_33	2	ZNF451	6	56951642	57035105
Epithelial.Epithelial.1.1.1.1	6-region_33	2	BAG2	6	57037124	57054631
Epithelial.Epithelial.1.1.1.1	6-region_33	2	MTRNR2L9	6	62284008	62284534
Epithelial.Epithelial.1.1.1.1	6-region_33	2	PTP4A1	6	64231666	64293492
Epithelial.Epithelial.1.1.1.1	6-region_33	2	PHF3	6	64345725	64489229
Epithelial.Epithelial.1.1.1.1	6-region_33	2	LMBRD1	6	70385694	70507003
Epithelial.Epithelial.1.1.1.1	6-region_33	2	RP11-462G2.1	6	71104590	71109120
Epithelial.Epithelial.1.1.1.1	6-region_33	2	FAM135A	6	71122644	71270877
Epithelial.Epithelial.1.1.1.1	6-region_33	2	SMAP1	6	71377479	71571718
Epithelial.Epithelial.1.1.1.1	6-region_33	2	MB21D1	6	74123238	74161999
Epithelial.Epithelial.1.1.1.1	6-region_33	2	EEF1A1	6	74225473	74233520
Epithelial.Epithelial.1.1.1.1	6-region_33	2	SLC17A5	6	74303102	74363878
Epithelial.Epithelial.1.1.1.1	6-region_33	2	CD109	6	74405508	74538040
Epithelial.Epithelial.1.1.1.1	6-region_33	2	COX7A2	6	75947391	75960039
Epithelial.Epithelial.1.1.1.1	6-region_33	2	TMEM30A	6	75962640	75994684
Epithelial.Epithelial.1.1.1.1	6-region_33	2	SENP6	6	76311225	76427997
Epithelial.Epithelial.1.1.1.1	6-region_33	2	MYO6	6	76458909	76629254
Epithelial.Epithelial.1.1.1.1	6-region_33	2	PHIP	6	79645584	79787953
Epithelial.Epithelial.1.1.1.1	6-region_33	2	HMGN3	6	79910962	79944406
Epithelial.Epithelial.1.1.1.1	6-region_33	2	SH3BGRL2	6	80341000	80413372
Epithelial.Epithelial.1.1.1.1	6-region_33	2	FAM46A	6	82201156	82462491
Epithelial.Epithelial.1.1.1.1	6-region_33	2	IBTK	6	82879700	82957471
Epithelial.Epithelial.1.1.1.1	6-region_33	2	TPBG	6	83072923	83080545
Epithelial.Epithelial.1.1.1.1	6-region_33	2	PGM3	6	83870869	83903655
Epithelial.Epithelial.1.1.1.1	6-region_33	2	NT5E	6	86159809	86205500
Epithelial.Epithelial.1.1.1.1	6-region_33	2	SNX14	6	86215214	86303874
Epithelial.Epithelial.1.1.1.1	6-region_33	2	SYNCRIP	6	86318053	86353510
Epithelial.Epithelial.1.1.1.1	6-region_33	2	ZNF292	6	87862551	87973914
Epithelial.Epithelial.1.1.1.1	6-region_33	2	SLC35A1	6	88180341	88222054
Epithelial.Epithelial.1.1.1.1	6-region_33	2	RARS2	6	88224096	88299721
Epithelial.Epithelial.1.1.1.1	6-region_33	2	ORC3	6	88299839	88377169
Epithelial.Epithelial.1.1.1.1	6-region_33	2	AKIRIN2	6	88384790	88411927
Epithelial.Epithelial.1.1.1.1	6-region_33	2	PNRC1	6	89790470	89794879
Epithelial.Epithelial.1.1.1.1	6-region_33	2	PM20D2	6	89855769	89875284
Epithelial.Epithelial.1.1.1.1	6-region_33	2	UBE2J1	6	90036344	90062567
Epithelial.Epithelial.1.1.1.1	6-region_33	2	LYRM2	6	90277863	90348472
Epithelial.Epithelial.1.1.1.1	6-region_33	2	MDN1	6	90352218	90529442
Epithelial.Epithelial.1.1.1.1	6-region_33	2	MAP3K7	6	91223292	91296764
Epithelial.Epithelial.1.1.1.1	6-region_33	2	UFL1	6	96969471	97003152
Epithelial.Epithelial.1.1.1.1	6-region_33	2	NDUFAF4	6	97337189	97345757
Epithelial.Epithelial.1.1.1.1	6-region_33	2	PNISR	6	99845927	99873207
Epithelial.Epithelial.1.1.1.1	6-region_33	2	CCNC	6	99990256	100016849
Epithelial.Epithelial.1.1.1.1	6-region_33	2	ASCC3	6	100956070	101329248
Epithelial.Epithelial.1.1.1.1	6-region_33	2	PREP	6	105725440	105850959
Epithelial.Epithelial.1.1.1.1	6-region_33	2	ATG5	6	106632351	106773666
Epithelial.Epithelial.1.1.1.1	6-region_33	2	AIM1	6	106959730	107018326
Epithelial.Epithelial.1.1.1.1	6-region_33	2	C6orf203	6	107349407	107372546
Epithelial.Epithelial.1.1.1.1	6-region_33	2	SEC63	6	108188960	108279393
Epithelial.Epithelial.1.1.1.1	6-region_33	2	OSTM1	6	108362613	108487058
Epithelial.Epithelial.1.1.1.1	6-region_33	2	SNX3	6	108532426	108582464
Epithelial.Epithelial.1.1.1.1	6-region_33	2	FOXO3	6	108881038	109005977
Epithelial.Epithelial.1.1.1.1	6-region_33	2	CD164	6	109687717	109703762
Epithelial.Epithelial.1.1.1.1	6-region_33	2	CDC40	6	110501344	110575478
Epithelial.Epithelial.1.1.1.1	6-region_33	2	AMD1	6	111195973	111216916
Epithelial.Epithelial.1.1.1.1	6-region_33	2	GTF3C6	6	111279763	111289093
Epithelial.Epithelial.1.1.1.1	6-region_33	2	RPF2	6	111303218	111349466
Epithelial.Epithelial.1.1.1.1	6-region_33	2	REV3L	6	111620234	111804918
Epithelial.Epithelial.1.1.1.1	6-region_33	2	TRAF3IP2	6	111877657	111927481
Epithelial.Epithelial.1.1.1.1	6-region_33	2	FYN	6	111981535	112194655
Epithelial.Epithelial.1.1.1.1	6-region_33	2	FAM229B	6	112408802	112423993
Epithelial.Epithelial.1.1.1.1	6-region_33	2	MARCKS	6	114178541	114184648
Epithelial.Epithelial.1.1.1.1	6-region_33	2	HDAC2	6	114254192	114332472
Epithelial.Epithelial.1.1.1.1	6-region_33	2	FRK	6	116252312	116381921
Epithelial.Epithelial.1.1.1.1	6-region_33	2	NT5DC1	6	116422012	116570660
Epithelial.Epithelial.1.1.1.1	6-region_33	2	TSPYL1	6	116597741	116601066
Epithelial.Epithelial.1.1.1.1	6-region_33	2	RWDD1	6	116892530	116918838
Epithelial.Epithelial.1.1.1.1	6-region_33	2	GOPC	6	117639374	117923691
Epithelial.Epithelial.1.1.1.1	6-region_33	2	DCBLD1	6	117774980	117891021
Epithelial.Epithelial.1.1.1.1	6-region_33	2	NUS1	6	117996665	118031803
Epithelial.Epithelial.1.1.1.1	6-region_33	2	ASF1A	6	119215384	119230332
Epithelial.Epithelial.1.1.1.1	6-region_33	2	SERINC1	6	122764499	122792967
Epithelial.Epithelial.1.1.1.1	6-region_33	2	PKIB	6	122793076	123047518
Epithelial.Epithelial.1.1.1.1	6-region_33	2	SMPDL3A	6	123110315	123130865
Epithelial.Epithelial.1.1.1.1	6-region_33	2	TPD52L1	6	125440195	125585553
Epithelial.Epithelial.1.1.1.1	6-region_33	2	HDDC2	6	125541108	125623282
Epithelial.Epithelial.1.1.1.1	6-region_33	2	NCOA7	6	126102307	126252266
Epithelial.Epithelial.1.1.1.1	6-region_33	2	HINT3	6	126277927	126301387
Epithelial.Epithelial.1.1.1.1	6-region_33	2	TRMT11	6	126307576	126360422
Epithelial.Epithelial.1.1.1.1	6-region_33	2	CENPW	6	126661320	126670021
Epithelial.Epithelial.1.1.1.1	6-region_33	2	RNF146	6	127587755	127609712
Epithelial.Epithelial.1.1.1.1	6-region_33	2	ECHDC1	6	127609855	127664754
Epithelial.Epithelial.1.1.1.1	6-region_33	2	PTPRK	6	128289924	128841870
Epithelial.Epithelial.1.1.1.1	6-region_33	2	ARHGAP18	6	129897277	130031370
Epithelial.Epithelial.1.1.1.1	6-region_33	2	EPB41L2	6	131160487	131384462
Epithelial.Epithelial.1.1.1.1	6-region_33	2	CTGF	6	132269316	132272513
Epithelial.Epithelial.1.1.1.1	6-region_33	2	STX7	6	132767006	132834337
Epithelial.Epithelial.1.1.1.1	6-region_33	2	VNN1	6	133002729	133035188
Epithelial.Epithelial.1.1.1.1	6-region_33	2	SLC18B1	6	133090509	133119701
Epithelial.Epithelial.1.1.1.1	6-region_33	2	RPS12	6	133135580	133138703
Epithelial.Epithelial.1.1.1.1	6-region_33	2	TBPL1	6	134273308	134311570
Epithelial.Epithelial.1.1.1.1	6-region_33	2	SGK1	6	134490384	134639250
Epithelial.Epithelial.1.1.1.1	6-region_33	2	HBS1L	6	135281516	135424194
Epithelial.Epithelial.1.1.1.1	6-region_33	2	AHI1	6	135604670	135818914
Epithelial.Epithelial.1.1.1.1	6-region_33	2	BCLAF1	6	136578001	136610989
Epithelial.Epithelial.1.1.1.1	6-region_33	2	MAP7	6	136663875	136871957
Epithelial.Epithelial.1.1.1.1	6-region_33	2	MAP3K5	6	136878185	137113656
Epithelial.Epithelial.1.1.1.1	6-region_33	2	PEX7	6	137143717	137235075
Epithelial.Epithelial.1.1.1.1	6-region_33	2	IL20RA	6	137321108	137366298
Epithelial.Epithelial.1.1.1.1	6-region_33	2	IFNGR1	6	137518621	137540586
Epithelial.Epithelial.1.1.1.1	6-region_33	2	TNFAIP3	6	138188351	138204449
Epithelial.Epithelial.1.1.1.1	6-region_33	2	PERP	6	138409642	138428648
Epithelial.Epithelial.1.1.1.1	6-region_33	2	KIAA1244	6	138483058	138665800
Epithelial.Epithelial.1.1.1.1	6-region_33	2	HEBP2	6	138724668	138743334
Epithelial.Epithelial.1.1.1.1	6-region_33	2	CCDC28A	6	139094657	139114456
Epithelial.Epithelial.1.1.1.1	6-region_33	2	REPS1	6	139224630	139309398
Epithelial.Epithelial.1.1.1.1	6-region_33	2	ABRACL	6	139349819	139364439
Epithelial.Epithelial.1.1.1.1	6-region_33	2	HECA	6	139456249	139501939
Epithelial.Epithelial.1.1.1.1	6-region_33	2	CITED2	6	139693393	139695757
Epithelial.Epithelial.1.1.1.1	6-region_33	2	VTA1	6	142468367	142545826
Epithelial.Epithelial.1.1.1.1	6-region_33	2	GPR126	6	142622991	142767403
Epithelial.Epithelial.1.1.1.1	6-region_33	2	HIVEP2	6	143072604	143266338
Epithelial.Epithelial.1.1.1.1	6-region_33	2	AIG1	6	143381633	143661441
Epithelial.Epithelial.1.1.1.1	6-region_33	2	FUCA2	6	143815948	143832827
Epithelial.Epithelial.1.1.1.1	6-region_33	2	PHACTR2	6	143857982	144152322
Epithelial.Epithelial.1.1.1.1	6-region_33	2	LTV1	6	144164481	144184949
Epithelial.Epithelial.1.1.1.1	6-region_33	2	PLAGL1	6	144261437	144385735
Epithelial.Epithelial.1.1.1.1	6-region_33	2	SF3B5	6	144416018	144416754
Epithelial.Epithelial.1.1.1.1	6-region_33	2	UTRN	6	144606837	145174170
Epithelial.Epithelial.1.1.1.1	6-region_33	2	SHPRH	6	146185381	146285559
Epithelial.Epithelial.1.1.1.1	6-region_33	2	RAB32	6	146864829	146876101
Epithelial.Epithelial.1.1.1.1	6-region_33	2	TAB2	6	149539777	149732749
Epithelial.Epithelial.1.1.1.1	6-region_33	2	PPIL4	6	149825869	149867174
Epithelial.Epithelial.1.1.1.1	6-region_33	2	GINM1	6	149887430	149912884
Epithelial.Epithelial.1.1.1.1	6-region_33	2	KATNA1	6	149916009	149970108
Epithelial.Epithelial.1.1.1.1	6-region_33	2	LATS1	6	149979289	150039392
Epithelial.Epithelial.1.1.1.1	6-region_33	2	PCMT1	6	150070579	150132556
Epithelial.Epithelial.1.1.1.1	6-region_33	2	LRP11	6	150139934	150186199
Epithelial.Epithelial.1.1.1.1	6-region_33	2	RP11-350J20.12	6	150173598	150174328
Epithelial.Epithelial.1.1.1.1	6-region_33	2	PPP1R14C	6	150464212	150571493
Epithelial.Epithelial.1.1.1.1	6-region_33	2	MTHFD1L	6	151186685	151423023
Epithelial.Epithelial.1.1.1.1	6-region_33	2	AKAP12	6	151561134	151679692
Epithelial.Epithelial.1.1.1.1	6-region_33	2	C6orf211	6	151773422	151791236
Epithelial.Epithelial.1.1.1.1	6-region_33	2	SYNE1	6	152442819	152958936
Epithelial.Epithelial.1.1.1.1	6-region_33	2	MTRF1L	6	153308497	153323820
Epithelial.Epithelial.1.1.1.1	6-region_33	2	SCAF8	6	155054459	155155192
Epithelial.Epithelial.1.1.1.1	6-region_33	2	TFB1M	6	155578643	155635627
Epithelial.Epithelial.1.1.1.1	6-region_33	2	ARID1B	6	157099063	157531913
Epithelial.Epithelial.1.1.1.1	6-region_33	2	TMEM242	6	157710418	157744633
Epithelial.Epithelial.1.1.1.1	6-region_33	2	ZDHHC14	6	157802165	158099178
Epithelial.Epithelial.1.1.1.1	6-region_33	2	SNX9	6	158244296	158366109
Epithelial.Epithelial.1.1.1.1	6-region_33	2	SYNJ2	6	158402888	158520208
Epithelial.Epithelial.1.1.1.1	6-region_33	2	GTF2H5	6	158589384	158620376
Epithelial.Epithelial.1.1.1.1	6-region_33	2	TULP4	6	158733692	158932860
Epithelial.Epithelial.1.1.1.1	6-region_33	2	TMEM181	6	158957468	159056460
Epithelial.Epithelial.1.1.1.1	6-region_33	2	DYNLT1	6	159057506	159065771
Epithelial.Epithelial.1.1.1.1	6-region_33	2	EZR	6	159186773	159240444
Epithelial.Epithelial.1.1.1.1	6-region_33	2	RSPH3	6	159393903	159421219
Epithelial.Epithelial.1.1.1.1	6-region_33	2	SOD2	6	160090089	160183561
Epithelial.Epithelial.1.1.1.1	6-region_33	2	WTAP	6	160146617	160177351
Epithelial.Epithelial.1.1.1.1	6-region_33	2	ACAT2	6	160181360	160200144
Epithelial.Epithelial.1.1.1.1	6-region_33	2	TCP1	6	160199530	160210781
Epithelial.Epithelial.1.1.1.1	6-region_33	2	MRPL18	6	160210844	160219468
Epithelial.Epithelial.1.1.1.1	6-region_33	2	IGF2R	6	160390131	160534539
Epithelial.Epithelial.1.1.1.1	6-region_33	2	SLC22A3	6	160769300	160876014
Epithelial.Epithelial.1.1.1.1	6-region_33	2	MAP3K4	6	161412759	161538417
Epithelial.Epithelial.1.1.1.1	6-region_33	2	AGPAT4	6	161551011	161695093
Epithelial.Epithelial.1.1.1.1	6-region_33	2	QKI	6	163835032	163999628
Epithelial.Epithelial.1.1.1.1	6-region_33	2	SFT2D1	6	166733216	166756079
Epithelial.Epithelial.1.1.1.1	6-region_33	2	MPC1	6	166778407	166796486
Epithelial.Epithelial.1.1.1.1	6-region_33	2	RPS6KA2	6	166822852	167319939
Epithelial.Epithelial.1.1.1.1	6-region_33	2	RNASET2	6	167342992	167370679
Epithelial.Epithelial.1.1.1.1	6-region_33	2	FGFR1OP	6	167412670	167466201
Epithelial.Epithelial.1.1.1.1	6-region_33	2	MLLT4	6	168227602	168372703
Epithelial.Epithelial.1.1.1.1	6-region_33	2	SMOC2	6	168841831	169073984
Epithelial.Epithelial.1.1.1.1	6-region_33	2	C6orf120	6	170102233	170106401
Epithelial.Epithelial.1.1.1.1	6-region_33	2	PHF10	6	170104001	170124151
Epithelial.Epithelial.1.1.1.1	6-region_33	2	FAM120B	6	170599791	170716153
Epithelial.Epithelial.1.1.1.1	6-region_33	2	PSMB1	6	170844205	170862429
Epithelial.Epithelial.1.1.1.1	6-region_33	2	TBP	6	170863390	170881958
Epithelial.Epithelial.1.1.1.1	6-region_33	2	PDCD2	6	170884383	170893780
Epithelial.Epithelial.1.1.1.1	7-region_34	5	FAM20C	7	192969	300711
Epithelial.Epithelial.1.1.1.1	7-region_34	5	PDGFA	7	536895	559933
Epithelial.Epithelial.1.1.1.1	7-region_34	5	PRKAR1B	7	588834	767287
Epithelial.Epithelial.1.1.1.1	7-region_34	5	SUN1	7	855528	936072
Epithelial.Epithelial.1.1.1.1	7-region_34	5	GET4	7	916189	936073
Epithelial.Epithelial.1.1.1.1	7-region_34	5	ADAP1	7	937540	995043
Epithelial.Epithelial.1.1.1.1	7-region_34	5	COX19	7	938415	1015235
Epithelial.Epithelial.1.1.1.1	7-region_34	5	C7orf50	7	1036622	1177896
Epithelial.Epithelial.1.1.1.1	7-region_34	5	ZFAND2A	7	1191707	1200395
Epithelial.Epithelial.1.1.1.1	7-region_34	5	MICALL2	7	1468101	1499138
Epithelial.Epithelial.1.1.1.1	7-region_34	5	INTS1	7	1509913	1545489
Epithelial.Epithelial.1.1.1.1	7-region_34	5	MAFK	7	1570350	1582679
Epithelial.Epithelial.1.1.1.1	7-region_34	5	TMEM184A	7	1581871	1600457
Epithelial.Epithelial.1.1.1.1	7-region_34	5	PSMG3	7	1606966	1610641
Epithelial.Epithelial.1.1.1.1	7-region_34	5	MAD1L1	7	1855429	2272878
Epithelial.Epithelial.1.1.1.1	7-region_34	5	FTSJ2	7	2273866	2281840
Epithelial.Epithelial.1.1.1.1	7-region_34	5	NUDT1	7	2281857	2290781
Epithelial.Epithelial.1.1.1.1	7-region_34	5	SNX8	7	2291405	2393953
Epithelial.Epithelial.1.1.1.1	7-region_34	5	EIF3B	7	2393721	2420380
Epithelial.Epithelial.1.1.1.1	7-region_34	5	CHST12	7	2443223	2474242
Epithelial.Epithelial.1.1.1.1	7-region_34	5	LFNG	7	2552163	2568811
Epithelial.Epithelial.1.1.1.1	7-region_34	5	BRAT1	7	2577511	2595361
Epithelial.Epithelial.1.1.1.1	7-region_34	5	IQCE	7	2598632	2654368
Epithelial.Epithelial.1.1.1.1	7-region_34	5	TTYH3	7	2671585	2704436
Epithelial.Epithelial.1.1.1.1	7-region_34	5	GNA12	7	2767746	2883958
Epithelial.Epithelial.1.1.1.1	7-region_34	5	CARD11	7	2945775	3083579
Epithelial.Epithelial.1.1.1.1	7-region_34	5	FOXK1	7	4683388	4811074
Epithelial.Epithelial.1.1.1.1	7-region_34	5	AP5Z1	7	4815253	4833943
Epithelial.Epithelial.1.1.1.1	7-region_34	5	RBAK	7	5085452	5109119
Epithelial.Epithelial.1.1.1.1	7-region_34	5	WIPI2	7	5229819	5273457
Epithelial.Epithelial.1.1.1.1	7-region_34	5	TNRC18	7	5346421	5465045
Epithelial.Epithelial.1.1.1.1	7-region_34	5	ACTB	7	5566782	5603415
Epithelial.Epithelial.1.1.1.1	7-region_34	5	FSCN1	7	5632439	5646286
Epithelial.Epithelial.1.1.1.1	7-region_34	5	RNF216	7	5659678	5821370
Epithelial.Epithelial.1.1.1.1	7-region_34	5	CCZ1	7	5938356	5965605
Epithelial.Epithelial.1.1.1.1	7-region_34	5	PMS2	7	6012870	6048756
Epithelial.Epithelial.1.1.1.1	7-region_34	5	AIMP2	7	6048876	6063465
Epithelial.Epithelial.1.1.1.1	7-region_34	5	EIF2AK1	7	6061881	6098861
Epithelial.Epithelial.1.1.1.1	7-region_34	5	USP42	7	6144515	6201195
Epithelial.Epithelial.1.1.1.1	7-region_34	5	FAM220A	7	6369040	6388612
Epithelial.Epithelial.1.1.1.1	7-region_34	5	RAC1	7	6414154	6443608
Epithelial.Epithelial.1.1.1.1	7-region_34	5	DAGLB	7	6448757	6523821
Epithelial.Epithelial.1.1.1.1	7-region_34	5	KDELR2	7	6485584	6523873
Epithelial.Epithelial.1.1.1.1	7-region_34	5	ZDHHC4	7	6617065	6629005
Epithelial.Epithelial.1.1.1.1	7-region_34	5	C7orf26	7	6629648	6648357
Epithelial.Epithelial.1.1.1.1	7-region_34	5	ZNF12	7	6728064	6746554
Epithelial.Epithelial.1.1.1.1	7-region_34	5	CCZ1B	7	6833765	6866401
Epithelial.Epithelial.1.1.1.1	7-region_34	5	C1GALT1	7	7196565	7288282
Epithelial.Epithelial.1.1.1.1	7-region_34	5	RP5-1159O4.1	7	7592093	7606627
Epithelial.Epithelial.1.1.1.1	7-region_34	5	MIOS	7	7606503	7648560
Epithelial.Epithelial.1.1.1.1	7-region_34	5	RPA3	7	7676149	7758238
Epithelial.Epithelial.1.1.1.1	7-region_34	5	ICA1	7	8152814	8302317
Epithelial.Epithelial.1.1.1.1	7-region_34	5	NDUFA4	7	10971578	10979883
Epithelial.Epithelial.1.1.1.1	7-region_34	5	PHF14	7	11013499	11209250
Epithelial.Epithelial.1.1.1.1	7-region_34	5	THSD7A	7	11409984	11871824
Epithelial.Epithelial.1.1.1.1	7-region_34	5	TMEM106B	7	12250867	12282993
Epithelial.Epithelial.1.1.1.1	7-region_34	5	ARL4A	7	12726481	12730559
Epithelial.Epithelial.1.1.1.1	7-region_34	5	ETV1	7	13930853	14031050
Epithelial.Epithelial.1.1.1.1	7-region_34	5	AC005550.3	7	15707572	15721605
Epithelial.Epithelial.1.1.1.1	7-region_34	5	ANKMY2	7	16639401	16685442
Epithelial.Epithelial.1.1.1.1	7-region_34	5	BZW2	7	16685756	16746148
Epithelial.Epithelial.1.1.1.1	7-region_34	5	TSPAN13	7	16793160	16824161
Epithelial.Epithelial.1.1.1.1	7-region_34	5	AGR2	7	16831435	16873057
Epithelial.Epithelial.1.1.1.1	7-region_34	5	AGR3	7	16899029	16921611
Epithelial.Epithelial.1.1.1.1	7-region_34	5	AHR	7	17338246	17385776
Epithelial.Epithelial.1.1.1.1	7-region_34	5	SNX13	7	17830385	17980124
Epithelial.Epithelial.1.1.1.1	7-region_34	5	HDAC9	7	18126572	19042039
Epithelial.Epithelial.1.1.1.1	7-region_34	5	TWISTNB	7	19735085	19748710
Epithelial.Epithelial.1.1.1.1	7-region_34	5	MACC1	7	20174278	20257027
Epithelial.Epithelial.1.1.1.1	7-region_34	5	CTA-293F17.1	7	20367922	20371370
Epithelial.Epithelial.1.1.1.1	7-region_34	5	ITGB8	7	20370325	20455377
Epithelial.Epithelial.1.1.1.1	7-region_35	4	CDCA7L	7	21940518	21985702
Epithelial.Epithelial.1.1.1.1	7-region_35	4	TOMM7	7	22852251	22862470
Epithelial.Epithelial.1.1.1.1	7-region_35	4	KLHL7	7	23145353	23217533
Epithelial.Epithelial.1.1.1.1	7-region_35	4	NUPL2	7	23221446	23240630
Epithelial.Epithelial.1.1.1.1	7-region_35	4	MALSU1	7	23338358	23351348
Epithelial.Epithelial.1.1.1.1	7-region_35	4	IGF2BP3	7	23349828	23510086
Epithelial.Epithelial.1.1.1.1	7-region_35	4	TRA2A	7	23544399	23571660
Epithelial.Epithelial.1.1.1.1	7-region_35	4	FAM221A	7	23719749	23742868
Epithelial.Epithelial.1.1.1.1	7-region_35	4	MPP6	7	24612887	24733812
Epithelial.Epithelial.1.1.1.1	7-region_35	4	OSBPL3	7	24836158	25021253
Epithelial.Epithelial.1.1.1.1	7-region_35	4	CYCS	7	25159710	25164980
Epithelial.Epithelial.1.1.1.1	7-region_35	4	NFE2L3	7	26191860	26226745
Epithelial.Epithelial.1.1.1.1	7-region_35	4	HNRNPA2B1	7	26229547	26241149
Epithelial.Epithelial.1.1.1.1	7-region_35	4	CBX3	7	26240782	26252976
Epithelial.Epithelial.1.1.1.1	7-region_35	4	SNX10	7	26331541	26413949
Epithelial.Epithelial.1.1.1.1	7-region_35	4	SKAP2	7	26706681	27034858
Epithelial.Epithelial.1.1.1.1	7-region_37	4	PSPH	7	56078744	56119297
Epithelial.Epithelial.1.1.1.1	7-region_37	4	CCT6A	7	56119323	56131682
Epithelial.Epithelial.1.1.1.1	7-region_37	4	SUMF2	7	56131695	56148363
Epithelial.Epithelial.1.1.1.1	7-region_37	4	CHCHD2	7	56169262	56174269
Epithelial.Epithelial.1.1.1.1	7-region_37	4	ZNF680	7	63980262	64023484
Epithelial.Epithelial.1.1.1.1	7-region_37	4	ERV3-1	7	64451187	64467121
Epithelial.Epithelial.1.1.1.1	7-region_37	4	VKORC1L1	7	65338254	65424550
Epithelial.Epithelial.1.1.1.1	7-region_37	4	GUSB	7	65425671	65447301
Epithelial.Epithelial.1.1.1.1	7-region_37	4	ASL	7	65540785	65558545
Epithelial.Epithelial.1.1.1.1	7-region_37	4	CRCP	7	65579591	65619555
Epithelial.Epithelial.1.1.1.1	7-region_37	4	RP11-792A8.4	7	66204816	66205372
Epithelial.Epithelial.1.1.1.1	7-region_37	4	TMEM248	7	66386212	66423538
Epithelial.Epithelial.1.1.1.1	7-region_37	4	SBDS	7	66452664	66460588
Epithelial.Epithelial.1.1.1.1	7-region_37	4	TYW1	7	66460160	66704501
Epithelial.Epithelial.1.1.1.1	7-region_37	4	RP11-166O4.6	7	66798034	66799370
Epithelial.Epithelial.1.1.1.1	7-region_37	4	POM121	7	72349936	72421979
Epithelial.Epithelial.1.1.1.1	7-region_37	4	NSUN5	7	72716514	72722864
Epithelial.Epithelial.1.1.1.1	7-region_37	4	BAZ1B	7	72854728	72936608
Epithelial.Epithelial.1.1.1.1	7-region_37	4	BCL7B	7	72950686	72972332
Epithelial.Epithelial.1.1.1.1	7-region_37	4	TBL2	7	72983262	72993121
Epithelial.Epithelial.1.1.1.1	7-region_37	4	DNAJC30	7	73095299	73097783
Epithelial.Epithelial.1.1.1.1	7-region_37	4	WBSCR22	7	73097355	73119491
Epithelial.Epithelial.1.1.1.1	7-region_37	4	STX1A	7	73113536	73134002
Epithelial.Epithelial.1.1.1.1	7-region_37	4	LINC00035	7	73149368	73150384
Epithelial.Epithelial.1.1.1.1	7-region_37	4	ABHD11	7	73150424	73153197
Epithelial.Epithelial.1.1.1.1	7-region_37	4	CLDN3	7	73183328	73184600
Epithelial.Epithelial.1.1.1.1	7-region_37	4	CLDN4	7	73213872	73247014
Epithelial.Epithelial.1.1.1.1	7-region_37	4	LIMK1	7	73497263	73536855
Epithelial.Epithelial.1.1.1.1	7-region_37	4	EIF4H	7	73588575	73611431
Epithelial.Epithelial.1.1.1.1	7-region_37	4	LAT2	7	73613982	73644161
Epithelial.Epithelial.1.1.1.1	7-region_37	4	RFC2	7	73645829	73668774
Epithelial.Epithelial.1.1.1.1	7-region_37	4	CLIP2	7	73703805	73820273
Epithelial.Epithelial.1.1.1.1	7-region_37	4	GTF2IRD1	7	73868120	74016931
Epithelial.Epithelial.1.1.1.1	7-region_37	4	GTF2I	7	74071994	74175026
Epithelial.Epithelial.1.1.1.1	7-region_37	4	NCF1	7	74188309	74203659
Epithelial.Epithelial.1.1.1.1	7-region_37	4	WBSCR16	7	74441226	74490064
Epithelial.Epithelial.1.1.1.1	7-region_37	4	GTF2IRD2B	7	74508364	74565623
Epithelial.Epithelial.1.1.1.1	7-region_37	4	POM121C	7	75046066	75115548
Epithelial.Epithelial.1.1.1.1	7-region_37	4	RHBDD2	7	75471920	75518244
Epithelial.Epithelial.1.1.1.1	7-region_37	4	POR	7	75528518	75616173
Epithelial.Epithelial.1.1.1.1	7-region_37	4	TMEM120A	7	75616155	75623977
Epithelial.Epithelial.1.1.1.1	7-region_37	4	STYXL1	7	75625656	75677322
Epithelial.Epithelial.1.1.1.1	7-region_37	4	MDH2	7	75677369	75696826
Epithelial.Epithelial.1.1.1.1	7-region_37	4	HSPB1	7	75931861	75933612
Epithelial.Epithelial.1.1.1.1	7-region_37	4	YWHAG	7	75956116	75988348
Epithelial.Epithelial.1.1.1.1	7-region_37	4	ZP3	7	76026835	76071388
Epithelial.Epithelial.1.1.1.1	7-region_37	4	DTX2	7	76090993	76135312
Epithelial.Epithelial.1.1.1.1	7-region_37	4	UPK3B	7	76139745	76648340
Epithelial.Epithelial.1.1.1.1	7-region_37	4	GSAP	7	76940068	77045717
Epithelial.Epithelial.1.1.1.1	7-region_37	4	PTPN12	7	77166592	77269388
Epithelial.Epithelial.1.1.1.1	7-region_37	4	RSBN1L-AS1	7	77286977	77325582
Epithelial.Epithelial.1.1.1.1	7-region_37	4	RSBN1L	7	77325760	77412339
Epithelial.Epithelial.1.1.1.1	7-region_37	4	TMEM60	7	77423045	77427897
Epithelial.Epithelial.1.1.1.1	7-region_37	4	PHTF2	7	77428122	77586818
Epithelial.Epithelial.1.1.1.1	7-region_37	4	GNAI1	7	79763271	79848718
Epithelial.Epithelial.1.1.1.1	7-region_37	4	SEMA3C	7	80371854	80551675
Epithelial.Epithelial.1.1.1.1	7-region_37	4	DMTF1	7	86781677	86825653
Epithelial.Epithelial.1.1.1.1	7-region_37	4	TMEM243	7	86825478	86849903
Epithelial.Epithelial.1.1.1.1	7-region_37	4	TP53TG1	7	86954541	86974831
Epithelial.Epithelial.1.1.1.1	7-region_37	4	CROT	7	86974997	87029111
Epithelial.Epithelial.1.1.1.1	7-region_37	4	SLC25A40	7	87462883	87505672
Epithelial.Epithelial.1.1.1.1	7-region_37	4	DBF4	7	87505531	87538856
Epithelial.Epithelial.1.1.1.1	7-region_37	4	SRI	7	87834433	87856308
Epithelial.Epithelial.1.1.1.1	7-region_37	4	STEAP1	7	89783689	89794143
Epithelial.Epithelial.1.1.1.1	7-region_37	4	STEAP2	7	89796904	89867451
Epithelial.Epithelial.1.1.1.1	7-region_37	4	GTPBP10	7	89964537	90020769
Epithelial.Epithelial.1.1.1.1	7-region_37	4	CLDN12	7	90013035	90142716
Epithelial.Epithelial.1.1.1.1	7-region_37	4	AKAP9	7	91570181	91739987
Epithelial.Epithelial.1.1.1.1	7-region_37	4	CYP51A1	7	91741465	91772266
Epithelial.Epithelial.1.1.1.1	7-region_37	4	KRIT1	7	91828283	91875480
Epithelial.Epithelial.1.1.1.1	7-region_37	4	ANKIB1	7	91875548	92030698
Epithelial.Epithelial.1.1.1.1	7-region_37	4	GATAD1	7	92076767	92088150
Epithelial.Epithelial.1.1.1.1	7-region_37	4	PEX1	7	92116334	92157845
Epithelial.Epithelial.1.1.1.1	7-region_37	4	RBM48	7	92158087	92167319
Epithelial.Epithelial.1.1.1.1	7-region_37	4	FAM133B	7	92190107	92219708
Epithelial.Epithelial.1.1.1.1	7-region_37	4	CDK6	7	92234235	92465908
Epithelial.Epithelial.1.1.1.1	7-region_37	4	SAMD9	7	92728829	92747336
Epithelial.Epithelial.1.1.1.1	7-region_37	4	SAMD9L	7	92759368	92777682
Epithelial.Epithelial.1.1.1.1	7-region_37	4	TFPI2	7	93514709	93520303
Epithelial.Epithelial.1.1.1.1	7-region_37	4	GNG11	7	93551011	93557922
Epithelial.Epithelial.1.1.1.1	7-region_37	4	BET1	7	93592074	93633694
Epithelial.Epithelial.1.1.1.1	7-region_37	4	CASD1	7	94138531	94186331
Epithelial.Epithelial.1.1.1.1	7-region_37	4	PPP1R9A	7	94536514	94925727
Epithelial.Epithelial.1.1.1.1	7-region_37	4	PON3	7	94989256	95025680
Epithelial.Epithelial.1.1.1.1	7-region_37	4	PON2	7	95034175	95064510
Epithelial.Epithelial.1.1.1.1	7-region_37	4	PDK4	7	95212811	95225803
Epithelial.Epithelial.1.1.1.1	7-region_37	4	SLC25A13	7	95749532	95951459
Epithelial.Epithelial.1.1.1.1	7-region_37	4	SHFM1	7	96110938	96339203
Epithelial.Epithelial.1.1.1.1	7-region_37	4	ACN9	7	96745902	96811075
Epithelial.Epithelial.1.1.1.1	7-region_37	4	ASNS	7	97481430	97501854
Epithelial.Epithelial.1.1.1.1	7-region_37	4	LMTK2	7	97736197	97838945
Epithelial.Epithelial.1.1.1.1	7-region_37	4	TECPR1	7	97843936	97881563
Epithelial.Epithelial.1.1.1.1	7-region_37	4	BRI3	7	97881691	97937162
Epithelial.Epithelial.1.1.1.1	7-region_37	4	BAIAP2L1	7	97920963	98030380
Epithelial.Epithelial.1.1.1.1	7-region_37	4	TRRAP	7	98475556	98610866
Epithelial.Epithelial.1.1.1.1	7-region_37	4	SMURF1	7	98625061	98741723
Epithelial.Epithelial.1.1.1.1	7-region_37	4	ARPC1A	7	98923521	98985787
Epithelial.Epithelial.1.1.1.1	7-region_37	4	ARPC1B	7	98971872	98992424
Epithelial.Epithelial.1.1.1.1	7-region_37	4	PDAP1	7	98989671	99006452
Epithelial.Epithelial.1.1.1.1	7-region_37	4	BUD31	7	99006264	99017239
Epithelial.Epithelial.1.1.1.1	7-region_37	4	CPSF4	7	99036545	99054994
Epithelial.Epithelial.1.1.1.1	7-region_37	4	ATP5J2	7	99046098	99063954
Epithelial.Epithelial.1.1.1.1	7-region_37	4	ZNF394	7	99084142	99097947
Epithelial.Epithelial.1.1.1.1	7-region_37	4	ZNF655	7	99156029	99174076
Epithelial.Epithelial.1.1.1.1	7-region_37	4	CYP3A5	7	99245817	99277621
Epithelial.Epithelial.1.1.1.1	7-region_37	4	TRIM4	7	99474581	99517223
Epithelial.Epithelial.1.1.1.1	7-region_37	4	AZGP1	7	99564343	99573780
Epithelial.Epithelial.1.1.1.1	7-region_37	4	ZKSCAN1	7	99613204	99639312
Epithelial.Epithelial.1.1.1.1	7-region_37	4	ZNF3	7	99661656	99680171
Epithelial.Epithelial.1.1.1.1	7-region_37	4	COPS6	7	99686577	99689823
Epithelial.Epithelial.1.1.1.1	7-region_37	4	MCM7	7	99690351	99699563
Epithelial.Epithelial.1.1.1.1	7-region_37	4	AP4M1	7	99699172	99707968
Epithelial.Epithelial.1.1.1.1	7-region_37	4	TAF6	7	99704693	99717464
Epithelial.Epithelial.1.1.1.1	7-region_37	4	LAMTOR4	7	99746530	99753567
Epithelial.Epithelial.1.1.1.1	7-region_37	4	PILRB	7	99933737	99965356
Epithelial.Epithelial.1.1.1.1	7-region_37	4	MEPCE	7	100026413	100031741
Epithelial.Epithelial.1.1.1.1	7-region_37	4	PPP1R35	7	100032905	100034188
Epithelial.Epithelial.1.1.1.1	7-region_37	4	TSC22D4	7	100060982	100076902
Epithelial.Epithelial.1.1.1.1	7-region_37	4	AGFG2	7	100136834	100165842
Epithelial.Epithelial.1.1.1.1	7-region_37	4	LRCH4	7	100169855	100183776
Epithelial.Epithelial.1.1.1.1	7-region_37	4	MOSPD3	7	100209725	100213007
Epithelial.Epithelial.1.1.1.1	7-region_37	4	GNB2	7	100271154	100276797
Epithelial.Epithelial.1.1.1.1	7-region_37	4	GIGYF1	7	100277130	100287071
Epithelial.Epithelial.1.1.1.1	7-region_37	4	POP7	7	100303676	100305118
Epithelial.Epithelial.1.1.1.1	7-region_37	4	EPHB4	7	100400187	100425121
Epithelial.Epithelial.1.1.1.1	7-region_37	4	SLC12A9	7	100424442	100464631
Epithelial.Epithelial.1.1.1.1	7-region_37	4	TRIP6	7	100464760	100471076
Epithelial.Epithelial.1.1.1.1	7-region_37	4	SRRT	7	100472733	100486285
Epithelial.Epithelial.1.1.1.1	7-region_37	4	MUC3A	7	100547187	100611118
Epithelial.Epithelial.1.1.1.1	7-region_37	4	TRIM56	7	100728720	100735017
Epithelial.Epithelial.1.1.1.1	7-region_37	4	SERPINE1	7	100770370	100782547
Epithelial.Epithelial.1.1.1.1	7-region_37	4	AP1S1	7	100797678	100804877
Epithelial.Epithelial.1.1.1.1	7-region_37	4	PLOD3	7	100849258	100861701
Epithelial.Epithelial.1.1.1.1	8-region_40	2	TUSC3	8	15274724	15624158
Epithelial.Epithelial.1.1.1.1	8-region_40	2	ZDHHC2	8	17013538	17082308
Epithelial.Epithelial.1.1.1.1	8-region_40	2	CNOT7	8	17086737	17104387
Epithelial.Epithelial.1.1.1.1	8-region_40	2	VPS37A	8	17104080	17159936
Epithelial.Epithelial.1.1.1.1	8-region_40	2	MTUS1	8	17501304	17658426
Epithelial.Epithelial.1.1.1.1	8-region_40	2	FGL1	8	17721889	17767874
Epithelial.Epithelial.1.1.1.1	8-region_40	2	PCM1	8	17780349	17885478
Epithelial.Epithelial.1.1.1.1	8-region_40	2	ASAH1	8	17913934	17942494
Epithelial.Epithelial.1.1.1.1	8-region_40	2	PSD3	8	18384811	18942240
Epithelial.Epithelial.1.1.1.1	8-region_40	2	SH2D4A	8	19171128	19253729
Epithelial.Epithelial.1.1.1.1	8-region_40	2	INTS10	8	19674651	19709594
Epithelial.Epithelial.1.1.1.1	8-region_40	2	ATP6V1B2	8	20054878	20084330
Epithelial.Epithelial.1.1.1.1	8-region_40	2	XPO7	8	21777180	21864096
Epithelial.Epithelial.1.1.1.1	8-region_40	2	FAM160B2	8	21946670	21962409
Epithelial.Epithelial.1.1.1.1	8-region_40	2	REEP4	8	21995533	21999464
Epithelial.Epithelial.1.1.1.1	8-region_40	2	BMP1	8	22022249	22069839
Epithelial.Epithelial.1.1.1.1	8-region_40	2	POLR3D	8	22102617	22112113
Epithelial.Epithelial.1.1.1.1	8-region_40	2	SLC39A14	8	22224762	22291642
Epithelial.Epithelial.1.1.1.1	8-region_40	2	SORBS3	8	22402499	22433301
Epithelial.Epithelial.1.1.1.1	8-region_40	2	PDLIM2	8	22435792	22455538
Epithelial.Epithelial.1.1.1.1	8-region_40	2	CCAR2	8	22462145	22479027
Epithelial.Epithelial.1.1.1.1	8-region_40	2	BIN3	8	22477931	22526661
Epithelial.Epithelial.1.1.1.1	8-region_40	2	TNFRSF10B	8	22877646	22926692
Epithelial.Epithelial.1.1.1.1	8-region_40	2	TNFRSF10D	8	22993101	23021543
Epithelial.Epithelial.1.1.1.1	8-region_40	2	TNFRSF10A	8	23047965	23082639
Epithelial.Epithelial.1.1.1.1	8-region_40	2	CHMP7	8	23101150	23119512
Epithelial.Epithelial.1.1.1.1	8-region_40	2	R3HCC1	8	23127633	23153792
Epithelial.Epithelial.1.1.1.1	8-region_40	2	ENTPD4	8	23243296	23315208
Epithelial.Epithelial.1.1.1.1	8-region_40	2	SLC25A37	8	23386318	23432976
Epithelial.Epithelial.1.1.1.1	8-region_40	2	ADAM28	8	24151553	24216531
Epithelial.Epithelial.1.1.1.1	8-region_40	2	DOCK5	8	25042238	25275598
Epithelial.Epithelial.1.1.1.1	8-region_40	2	KCTD9	8	25285366	25315992
Epithelial.Epithelial.1.1.1.1	8-region_40	2	PPP2R2A	8	26149007	26230196
Epithelial.Epithelial.1.1.1.1	8-region_40	2	BNIP3L	8	26240414	26363152
Epithelial.Epithelial.1.1.1.1	8-region_40	2	DPYSL2	8	26371791	26515694
Epithelial.Epithelial.1.1.1.1	8-region_40	2	PTK2B	8	27168999	27316903
Epithelial.Epithelial.1.1.1.1	8-region_40	2	CLU	8	27454434	27472548
Epithelial.Epithelial.1.1.1.1	8-region_40	2	CCDC25	8	27590835	27630170
Epithelial.Epithelial.1.1.1.1	8-region_40	2	PBK	8	27667137	27695612
Epithelial.Epithelial.1.1.1.1	8-region_40	2	ELP3	8	27947190	28048673
Epithelial.Epithelial.1.1.1.1	8-region_40	2	ZNF395	8	28203102	28260218
Epithelial.Epithelial.1.1.1.1	8-region_40	2	EXTL3	8	28457986	28613116
Epithelial.Epithelial.1.1.1.1	8-region_40	2	KIF13B	8	28924796	29120641
Epithelial.Epithelial.1.1.1.1	8-region_40	2	DUSP4	8	29190581	29208185
Epithelial.Epithelial.1.1.1.1	8-region_40	2	TMEM66	8	29920528	29940723
Epithelial.Epithelial.1.1.1.1	8-region_40	2	LEPROTL1	8	29952914	30034724
Epithelial.Epithelial.1.1.1.1	8-region_40	2	DCTN6	8	30013813	30041156
Epithelial.Epithelial.1.1.1.1	8-region_40	2	RBPMS	8	30241944	30429778
Epithelial.Epithelial.1.1.1.1	8-region_40	2	GTF2E2	8	30435835	30515768
Epithelial.Epithelial.1.1.1.1	8-region_40	2	GSR	8	30535583	30585443
Epithelial.Epithelial.1.1.1.1	8-region_40	2	PPP2CB	8	30631973	30671830
Epithelial.Epithelial.1.1.1.1	8-region_40	2	ZNF703	8	37553269	37557537
Epithelial.Epithelial.1.1.1.1	8-region_40	2	ERLIN2	8	37594117	37616619
Epithelial.Epithelial.1.1.1.1	8-region_40	2	PROSC	8	37620111	37637283
Epithelial.Epithelial.1.1.1.1	8-region_40	2	BRF2	8	37700786	37707422
Epithelial.Epithelial.1.1.1.1	8-region_40	2	RAB11FIP1	8	37716136	37756985
Epithelial.Epithelial.1.1.1.1	8-region_42	2	ZBTB10	8	81397854	81438500
Epithelial.Epithelial.1.1.1.1	8-region_42	2	ZNF704	8	81540686	81787016
Epithelial.Epithelial.1.1.1.1	8-region_42	2	PAG1	8	81880045	82024303
Epithelial.Epithelial.1.1.1.1	8-region_42	2	FABP5	8	82192598	82197012
Epithelial.Epithelial.1.1.1.1	8-region_42	2	IMPA1	8	82570196	82598928
Epithelial.Epithelial.1.1.1.1	8-region_42	2	ZFAND1	8	82613569	82645138
Epithelial.Epithelial.1.1.1.1	8-region_42	2	CHMP4C	8	82644669	82671750
Epithelial.Epithelial.1.1.1.1	8-region_42	2	LRRCC1	8	86019382	86058311
Epithelial.Epithelial.1.1.1.1	8-region_42	2	C8orf59	8	86126311	86132650
Epithelial.Epithelial.1.1.1.1	8-region_42	2	CA2	8	86376081	86393722
Epithelial.Epithelial.1.1.1.1	8-region_42	2	WWP1	8	87354967	87490649
Epithelial.Epithelial.1.1.1.1	8-region_42	2	RMDN1	8	87480486	87526586
Epithelial.Epithelial.1.1.1.1	8-region_42	2	CPNE3	8	87497059	87573726
Epithelial.Epithelial.1.1.1.1	8-region_42	2	RIPK2	8	90769975	90803291
Epithelial.Epithelial.1.1.1.1	8-region_42	2	OSGIN2	8	90914087	90940116
Epithelial.Epithelial.1.1.1.1	8-region_42	2	NBN	8	90945564	91015456
Epithelial.Epithelial.1.1.1.1	8-region_42	2	DECR1	8	91013633	91064320
Epithelial.Epithelial.1.1.1.1	8-region_42	2	TMEM55A	8	92006024	92053292
Epithelial.Epithelial.1.1.1.1	8-region_42	2	GS1-251I9.4	8	92072137	92082417
Epithelial.Epithelial.1.1.1.1	8-region_42	2	OTUD6B	8	92082424	92099323
Epithelial.Epithelial.1.1.1.1	8-region_42	2	TRIQK	8	93895758	94029901
Epithelial.Epithelial.1.1.1.1	8-region_42	2	FAM92A1	8	94710789	94743755
Epithelial.Epithelial.1.1.1.1	8-region_42	2	RBM12B	8	94741584	94753245
Epithelial.Epithelial.1.1.1.1	8-region_42	2	TMEM67	8	94767072	94831462
Epithelial.Epithelial.1.1.1.1	8-region_42	2	PDP1	8	94870035	94938294
Epithelial.Epithelial.1.1.1.1	8-region_42	2	CDH17	8	95139399	95229531
Epithelial.Epithelial.1.1.1.1	8-region_42	2	GEM	8	95261481	95274578
Epithelial.Epithelial.1.1.1.1	8-region_42	2	KIAA1429	8	95499921	95565757
Epithelial.Epithelial.1.1.1.1	8-region_42	2	ESRP1	8	95653302	95719694
Epithelial.Epithelial.1.1.1.1	8-region_42	2	DPY19L4	8	95731931	95806064
Epithelial.Epithelial.1.1.1.1	8-region_42	2	INTS8	8	95825539	95893974
Epithelial.Epithelial.1.1.1.1	8-region_42	2	NDUFAF6	8	95907995	96128683
Epithelial.Epithelial.1.1.1.1	8-region_42	2	TP53INP1	8	95938200	95961639
Epithelial.Epithelial.1.1.1.1	8-region_42	2	PLEKHF2	8	96146032	96168912
Epithelial.Epithelial.1.1.1.1	8-region_42	2	UQCRB	8	97238148	97247862
Epithelial.Epithelial.1.1.1.1	8-region_42	2	PTDSS1	8	97273943	97349223
Epithelial.Epithelial.1.1.1.1	8-region_42	2	MTDH	8	98656407	98740998
Epithelial.Epithelial.1.1.1.1	8-region_42	2	LAPTM4B	8	98787285	98865241
Epithelial.Epithelial.1.1.1.1	8-region_42	2	RPL30	8	99037079	99058697
Epithelial.Epithelial.1.1.1.1	8-region_42	2	HRSP12	8	99114572	99129469
Epithelial.Epithelial.1.1.1.1	8-region_42	2	POP1	8	99129525	99172062
Epithelial.Epithelial.1.1.1.1	8-region_42	2	NIPAL2	8	99202061	99306621
Epithelial.Epithelial.1.1.1.1	8-region_42	2	STK3	8	99413631	99955055
Epithelial.Epithelial.1.1.1.1	8-region_42	2	OSR2	8	99956631	99964332
Epithelial.Epithelial.1.1.1.1	8-region_42	2	VPS13B	8	100025494	100889808
Epithelial.Epithelial.1.1.1.1	8-region_42	2	COX6C	8	100885428	100906290
Epithelial.Epithelial.1.1.1.1	8-region_42	2	POLR2K	8	101162812	101166230
Epithelial.Epithelial.1.1.1.1	8-region_42	2	SPAG1	8	101170134	101271506
Epithelial.Epithelial.1.1.1.1	8-region_42	2	RNF19A	8	101269288	101348446
Epithelial.Epithelial.1.1.1.1	8-region_42	2	ANKRD46	8	101521980	101572012
Epithelial.Epithelial.1.1.1.1	8-region_42	2	PABPC1	8	101698044	101735037
Epithelial.Epithelial.1.1.1.1	8-region_42	2	YWHAZ	8	101928753	101965616
Epithelial.Epithelial.1.1.1.1	8-region_44	4	TRAPPC9	8	140742586	141468678
Epithelial.Epithelial.1.1.1.1	8-region_44	4	CHRAC1	8	141521397	141527236
Epithelial.Epithelial.1.1.1.1	8-region_44	4	CASC7	8	141530255	141539600
Epithelial.Epithelial.1.1.1.1	8-region_44	4	AGO2	8	141541264	141645718
Epithelial.Epithelial.1.1.1.1	8-region_44	4	PTK2	8	141667999	142012315
Epithelial.Epithelial.1.1.1.1	8-region_44	4	DENND3	8	142127377	142205907
Epithelial.Epithelial.1.1.1.1	8-region_44	4	SLC45A4	8	142217265	142318404
Epithelial.Epithelial.1.1.1.1	8-region_44	4	PTP4A3	8	142402093	142441620
Epithelial.Epithelial.1.1.1.1	8-region_44	4	PSCA	8	143751726	143764142
Epithelial.Epithelial.1.1.1.1	8-region_44	4	LY6K	8	143781529	143786545
Epithelial.Epithelial.1.1.1.1	8-region_44	4	THEM6	8	143808621	143818345
Epithelial.Epithelial.1.1.1.1	8-region_44	4	LYNX1	8	143845752	143859640
Epithelial.Epithelial.1.1.1.1	8-region_44	4	LY6D	8	143866296	143868008
Epithelial.Epithelial.1.1.1.1	8-region_44	4	LY6E	8	144099399	144105249
Epithelial.Epithelial.1.1.1.1	8-region_44	4	GLI4	8	144349603	144359101
Epithelial.Epithelial.1.1.1.1	8-region_44	4	TOP1MT	8	144386554	144442149
Epithelial.Epithelial.1.1.1.1	8-region_44	4	RHPN1	8	144451057	144466390
Epithelial.Epithelial.1.1.1.1	8-region_44	4	ZC3H3	8	144519825	144623623
Epithelial.Epithelial.1.1.1.1	8-region_44	4	GSDMD	8	144635377	144645232
Epithelial.Epithelial.1.1.1.1	8-region_44	4	MROH6	8	144648357	144655141
Epithelial.Epithelial.1.1.1.1	8-region_44	4	NAPRT1	8	144656955	144660819
Epithelial.Epithelial.1.1.1.1	8-region_44	4	EEF1D	8	144661867	144681711
Epithelial.Epithelial.1.1.1.1	8-region_44	4	PYCRL	8	144686083	144691943
Epithelial.Epithelial.1.1.1.1	8-region_44	4	TSTA3	8	144694788	144700218
Epithelial.Epithelial.1.1.1.1	8-region_44	4	FAM83H	8	144806103	144815971
Epithelial.Epithelial.1.1.1.1	8-region_44	4	FAM83H-AS1	8	144816310	144828507
Epithelial.Epithelial.1.1.1.1	8-region_44	4	SCRIB	8	144873090	144897549
Epithelial.Epithelial.1.1.1.1	8-region_44	4	PUF60	8	144898514	144912029
Epithelial.Epithelial.1.1.1.1	8-region_44	4	EPPK1	8	144939497	144952632
Epithelial.Epithelial.1.1.1.1	8-region_44	4	PLEC	8	144989321	145050902
Epithelial.Epithelial.1.1.1.1	8-region_44	4	PARP10	8	145051321	145086940
Epithelial.Epithelial.1.1.1.1	8-region_44	4	GRINA	8	145064226	145067583
Epithelial.Epithelial.1.1.1.1	8-region_44	4	EXOSC4	8	145133529	145135550
Epithelial.Epithelial.1.1.1.1	8-region_44	4	GPAA1	8	145137493	145141119
Epithelial.Epithelial.1.1.1.1	8-region_44	4	CYC1	8	145149930	145152428
Epithelial.Epithelial.1.1.1.1	8-region_44	4	SHARPIN	8	145153536	145163027
Epithelial.Epithelial.1.1.1.1	8-region_44	4	MAF1	8	145159402	145162514
Epithelial.Epithelial.1.1.1.1	8-region_44	4	MROH1	8	145202919	145316843
Epithelial.Epithelial.1.1.1.1	8-region_44	4	BOP1	8	145486055	145515082
Epithelial.Epithelial.1.1.1.1	8-region_44	4	HSF1	8	145515280	145538385
Epithelial.Epithelial.1.1.1.1	8-region_44	4	DGAT1	8	145539954	145550573
Epithelial.Epithelial.1.1.1.1	8-region_44	4	SLC52A2	8	145577795	145584932
Epithelial.Epithelial.1.1.1.1	8-region_44	4	FBXL6	8	145579091	145583036
Epithelial.Epithelial.1.1.1.1	8-region_44	4	ADCK5	8	145596790	145618457
Epithelial.Epithelial.1.1.1.1	8-region_44	4	CPSF1	8	145618444	145634753
Epithelial.Epithelial.1.1.1.1	8-region_44	4	SLC39A4	8	145635126	145642279
Epithelial.Epithelial.1.1.1.1	8-region_44	4	VPS28	8	145649000	145653931
Epithelial.Epithelial.1.1.1.1	8-region_44	4	TONSL	8	145654165	145669827
Epithelial.Epithelial.1.1.1.1	8-region_44	4	CYHR1	8	145674965	145691060
Epithelial.Epithelial.1.1.1.1	8-region_44	4	KIFC2	8	145691426	145699585
Epithelial.Epithelial.1.1.1.1	8-region_44	4	PPP1R16A	8	145703352	145727504
Epithelial.Epithelial.1.1.1.1	8-region_44	4	MFSD3	8	145734457	145736596
Epithelial.Epithelial.1.1.1.1	8-region_44	4	LRRC14	8	145743376	145750557
Epithelial.Epithelial.1.1.1.1	8-region_44	4	C8orf82	8	145751117	145754516
Epithelial.Epithelial.1.1.1.1	8-region_44	4	RPL8	8	146015150	146017972
Epithelial.Epithelial.1.1.1.1	8-region_44	4	ZNF7	8	146052849	146072894
Epithelial.Epithelial.1.1.1.1	8-region_44	4	COMMD5	8	146066427	146079121
Epithelial.Epithelial.1.1.1.1	8-region_44	4	C8orf33	8	146277764	146281416
Epithelial.Epithelial.1.1.1.1	9-region_45	1	CBWD1	9	121041	188979
Epithelial.Epithelial.1.1.1.1	9-region_45	1	SMARCA2	9	2015342	2193624
Epithelial.Epithelial.1.1.1.1	9-region_45	1	KIAA0020	9	2720469	2844241
Epithelial.Epithelial.1.1.1.1	9-region_45	1	GLIS3	9	3824127	4348392
Epithelial.Epithelial.1.1.1.1	9-region_45	1	CDC37L1	9	4679559	4708398
Epithelial.Epithelial.1.1.1.1	9-region_45	1	AK3	9	4711155	4742043
Epithelial.Epithelial.1.1.1.1	9-region_45	1	PLGRKT	9	5357973	5437878
Epithelial.Epithelial.1.1.1.1	9-region_45	1	KIAA2026	9	5881596	6007901
Epithelial.Epithelial.1.1.1.1	9-region_45	1	UHRF2	9	6413151	6507054
Epithelial.Epithelial.1.1.1.1	9-region_45	1	RP11-390F4.3	9	6716548	6727438
Epithelial.Epithelial.1.1.1.1	9-region_45	1	KDM4C	9	6720863	7175648
Epithelial.Epithelial.1.1.1.1	9-region_45	1	TMEM261	9	7796490	7888380
Epithelial.Epithelial.1.1.1.1	9-region_45	1	LURAP1L	9	12775020	12822130
Epithelial.Epithelial.1.1.1.1	9-region_45	1	NFIB	9	14081842	14398982
Epithelial.Epithelial.1.1.1.1	9-region_45	1	SNAPC3	9	15422702	15465951
Epithelial.Epithelial.1.1.1.1	9-region_45	1	PSIP1	9	15464064	15511017
Epithelial.Epithelial.1.1.1.1	9-region_45	1	RRAGA	9	19049372	19051019
Epithelial.Epithelial.1.1.1.1	9-region_45	1	PLIN2	9	19108373	19149288
Epithelial.Epithelial.1.1.1.1	9-region_45	1	DENND4C	9	19230433	19374139
Epithelial.Epithelial.1.1.1.1	9-region_45	1	RPS6	9	19375713	19380252
Epithelial.Epithelial.1.1.1.1	9-region_45	1	MLLT3	9	20341663	20622542
Epithelial.Epithelial.1.1.1.1	9-region_45	1	KLHL9	9	21329670	21335379
Epithelial.Epithelial.1.1.1.1	9-region_45	1	MTAP	9	21802542	21931646
Epithelial.Epithelial.1.1.1.1	9-region_45	1	CDKN2A	9	21967751	21995300
Epithelial.Epithelial.1.1.1.1	9-region_46	2	CAAP1	9	26840683	26892802
Epithelial.Epithelial.1.1.1.1	9-region_46	2	PLAA	9	26904081	26947461
Epithelial.Epithelial.1.1.1.1	9-region_46	2	IFT74	9	26947037	27062928
Epithelial.Epithelial.1.1.1.1	9-region_46	2	ACO1	9	32384618	32454767
Epithelial.Epithelial.1.1.1.1	9-region_46	2	DDX58	9	32455300	32526322
Epithelial.Epithelial.1.1.1.1	9-region_46	2	TOPORS	9	32540542	32552551
Epithelial.Epithelial.1.1.1.1	9-region_46	2	NDUFB6	9	32552997	32573160
Epithelial.Epithelial.1.1.1.1	9-region_46	2	APTX	9	32972604	33025166
Epithelial.Epithelial.1.1.1.1	9-region_46	2	DNAJA1	9	33025209	33039905
Epithelial.Epithelial.1.1.1.1	9-region_46	2	SMU1	9	33041762	33076665
Epithelial.Epithelial.1.1.1.1	9-region_46	2	B4GALT1	9	33104080	33167354
Epithelial.Epithelial.1.1.1.1	9-region_46	2	BAG1	9	33247818	33264761
Epithelial.Epithelial.1.1.1.1	9-region_46	2	CHMP5	9	33264940	33281977
Epithelial.Epithelial.1.1.1.1	9-region_46	2	NFX1	9	33290509	33371155
Epithelial.Epithelial.1.1.1.1	9-region_46	2	AQP3	9	33441152	33447609
Epithelial.Epithelial.1.1.1.1	9-region_46	2	PRSS3	9	33750515	33799230
Epithelial.Epithelial.1.1.1.1	9-region_46	2	UBE2R2	9	33817565	33920402
Epithelial.Epithelial.1.1.1.1	9-region_46	2	UBAP2	9	33921691	34048947
Epithelial.Epithelial.1.1.1.1	9-region_46	2	DCAF12	9	34086385	34127397
Epithelial.Epithelial.1.1.1.1	9-region_46	2	UBAP1	9	34179003	34252521
Epithelial.Epithelial.1.1.1.1	9-region_46	2	NUDT2	9	34329504	34343709
Epithelial.Epithelial.1.1.1.1	9-region_46	2	RPP25L	9	34610483	34612101
Epithelial.Epithelial.1.1.1.1	9-region_46	2	DCTN3	9	34613548	34620515
Epithelial.Epithelial.1.1.1.1	9-region_46	2	SIGMAR1	9	34634719	34637806
Epithelial.Epithelial.1.1.1.1	9-region_46	2	GALT	9	34638130	34657110
Epithelial.Epithelial.1.1.1.1	9-region_46	2	VCP	9	35056061	35073246
Epithelial.Epithelial.1.1.1.1	9-region_46	2	STOML2	9	35099888	35103154
Epithelial.Epithelial.1.1.1.1	9-region_46	2	FAM214B	9	35104109	35116338
Epithelial.Epithelial.1.1.1.1	9-region_46	2	TESK1	9	35605367	35610038
Epithelial.Epithelial.1.1.1.1	9-region_46	2	CCDC107	9	35658301	35661508
Epithelial.Epithelial.1.1.1.1	9-region_46	2	CA9	9	35673853	35681156
Epithelial.Epithelial.1.1.1.1	9-region_46	2	TPM2	9	35681989	35691017
Epithelial.Epithelial.1.1.1.1	9-region_46	2	TLN1	9	35696945	35732392
Epithelial.Epithelial.1.1.1.1	9-region_46	2	CREB3	9	35732332	35737001
Epithelial.Epithelial.1.1.1.1	9-region_46	2	GBA2	9	35736863	35749983
Epithelial.Epithelial.1.1.1.1	9-region_46	2	RGP1	9	35749203	35758572
Epithelial.Epithelial.1.1.1.1	9-region_46	2	HINT2	9	35812957	35815351
Epithelial.Epithelial.1.1.1.1	9-region_46	2	TMEM8B	9	35814448	35854844
Epithelial.Epithelial.1.1.1.1	9-region_46	2	CLTA	9	36190853	36304778
Epithelial.Epithelial.1.1.1.1	9-region_46	2	GNE	9	36214438	36277053
Epithelial.Epithelial.1.1.1.1	9-region_46	2	RNF38	9	36336393	36487545
Epithelial.Epithelial.1.1.1.1	9-region_46	2	RP11-220I1.1	9	37079893	37090398
Epithelial.Epithelial.1.1.1.1	9-region_46	2	ZCCHC7	9	37120536	37358146
Epithelial.Epithelial.1.1.1.1	9-region_46	2	GRHPR	9	37422663	37436987
Epithelial.Epithelial.1.1.1.1	9-region_48	4	MRRF	9	125026882	125085743
Epithelial.Epithelial.1.1.1.1	9-region_48	4	PDCL	9	125560668	125590910
Epithelial.Epithelial.1.1.1.1	9-region_48	4	RC3H2	9	125606835	125667620
Epithelial.Epithelial.1.1.1.1	9-region_48	4	RABGAP1	9	125703112	125867145
Epithelial.Epithelial.1.1.1.1	9-region_48	4	STRBP	9	125871779	126030855
Epithelial.Epithelial.1.1.1.1	9-region_48	4	NEK6	9	127019885	127115586
Epithelial.Epithelial.1.1.1.1	9-region_48	4	PSMB7	9	127115745	127177723
Epithelial.Epithelial.1.1.1.1	9-region_48	4	RPL35	9	127620159	127624260
Epithelial.Epithelial.1.1.1.1	9-region_48	4	ARPC5L	9	127624409	127640003
Epithelial.Epithelial.1.1.1.1	9-region_48	4	GOLGA1	9	127640646	127710771
Epithelial.Epithelial.1.1.1.1	9-region_48	4	PPP6C	9	127908852	127952218
Epithelial.Epithelial.1.1.1.1	9-region_48	4	RABEPK	9	127962821	127996437
Epithelial.Epithelial.1.1.1.1	9-region_48	4	HSPA5	9	127997132	128003609
Epithelial.Epithelial.1.1.1.1	9-region_48	4	GAPVD1	9	128024073	128129486
Epithelial.Epithelial.1.1.1.1	9-region_48	4	MAPKAP1	9	128199672	128469513
Epithelial.Epithelial.1.1.1.1	9-region_48	4	ZBTB43	9	129567285	129600489
Epithelial.Epithelial.1.1.1.1	9-region_48	4	SLC2A8	9	130159421	130170703
Epithelial.Epithelial.1.1.1.1	9-region_48	4	RPL12	9	130209953	130213684
Epithelial.Epithelial.1.1.1.1	9-region_48	4	FAM129B	9	130267618	130341268
Epithelial.Epithelial.1.1.1.1	9-region_48	4	STXBP1	9	130374544	130457460
Epithelial.Epithelial.1.1.1.1	9-region_48	4	PTRH1	9	130455257	130487152
Epithelial.Epithelial.1.1.1.1	9-region_48	4	TOR2A	9	130493803	130497604
Epithelial.Epithelial.1.1.1.1	9-region_48	4	CDK9	9	130547958	130553066
Epithelial.Epithelial.1.1.1.1	9-region_48	4	FPGS	9	130556876	130576606
Epithelial.Epithelial.1.1.1.1	9-region_48	4	AK1	9	130628759	130640022
Epithelial.Epithelial.1.1.1.1	9-region_48	4	ST6GALNAC6	9	130647600	130667687
Epithelial.Epithelial.1.1.1.1	9-region_48	4	ST6GALNAC4	9	130670165	130679317
Epithelial.Epithelial.1.1.1.1	9-region_48	4	DPM2	9	130697378	130700763
Epithelial.Epithelial.1.1.1.1	9-region_48	4	FAM102A	9	130702858	130742792
Epithelial.Epithelial.1.1.1.1	9-region_48	4	SLC25A25	9	130830480	130871524
Epithelial.Epithelial.1.1.1.1	9-region_48	4	PTGES2	9	130882972	130890741
Epithelial.Epithelial.1.1.1.1	9-region_48	4	LCN2	9	130911350	130915734
Epithelial.Epithelial.1.1.1.1	9-region_48	4	C9orf16	9	130922539	130926207
Epithelial.Epithelial.1.1.1.1	9-region_48	4	CIZ1	9	130928343	130966662
Epithelial.Epithelial.1.1.1.1	9-region_48	4	DNM1	9	130965658	131017527
Epithelial.Epithelial.1.1.1.1	9-region_48	4	GOLGA2	9	131018108	131038274
Epithelial.Epithelial.1.1.1.1	9-region_48	4	SWI5	9	131037658	131051269
Epithelial.Epithelial.1.1.1.1	9-region_48	4	TRUB2	9	131071382	131085021
Epithelial.Epithelial.1.1.1.1	9-region_48	4	COQ4	9	131084815	131096351
Epithelial.Epithelial.1.1.1.1	9-region_48	4	SLC27A4	9	131102925	131123749
Epithelial.Epithelial.1.1.1.1	9-region_48	4	URM1	9	131133598	131153015
Epithelial.Epithelial.1.1.1.1	9-region_48	4	CERCAM	9	131174030	131199626
Epithelial.Epithelial.1.1.1.1	9-region_48	4	ODF2	9	131217465	131263571
Epithelial.Epithelial.1.1.1.1	9-region_48	4	GLE1	9	131266979	131304567
Epithelial.Epithelial.1.1.1.1	9-region_48	4	SPTAN1	9	131314866	131395941
Epithelial.Epithelial.1.1.1.1	9-region_48	4	WDR34	9	131395940	131419066
Epithelial.Epithelial.1.1.1.1	9-region_48	4	SET	9	131445703	131458679
Epithelial.Epithelial.1.1.1.1	9-region_48	4	ZDHHC12	9	131483148	131486406
Epithelial.Epithelial.1.1.1.1	9-region_48	4	RP11-545E17.3	9	131486724	131495473
Epithelial.Epithelial.1.1.1.1	9-region_48	4	ZER1	9	131492065	131534693
Epithelial.Epithelial.1.1.1.1	9-region_48	4	ENDOG	9	131580753	131584956
Epithelial.Epithelial.1.1.1.1	9-region_48	4	C9orf114	9	131581930	131592100
Epithelial.Epithelial.1.1.1.1	9-region_48	4	LRRC8A	9	131644391	131680318
Epithelial.Epithelial.1.1.1.1	9-region_48	4	DOLK	9	131707809	131709898
Epithelial.Epithelial.1.1.1.1	9-region_48	4	NUP188	9	131709978	131769375
Epithelial.Epithelial.1.1.1.1	9-region_48	4	SH3GLB2	9	131769315	131790582
Epithelial.Epithelial.1.1.1.1	9-region_48	4	DOLPP1	9	131843379	131852717
Epithelial.Epithelial.1.1.1.1	9-region_48	4	CRAT	9	131857089	131873468
Epithelial.Epithelial.1.1.1.1	9-region_48	4	PPP2R4	9	131873229	131911225
Epithelial.Epithelial.1.1.1.1	9-region_48	4	IER5L	9	131937835	131940540
Epithelial.Epithelial.1.1.1.1	9-region_48	4	NTMT1	9	132371163	132398209
Epithelial.Epithelial.1.1.1.1	9-region_48	4	ASB6	9	132399171	132404444
Epithelial.Epithelial.1.1.1.1	9-region_48	4	PRRX2	9	132427920	132484875
Epithelial.Epithelial.1.1.1.1	9-region_50	4	TMEM141	9	139685807	139687709
Epithelial.Epithelial.1.1.1.1	9-region_50	4	RABL6	9	139702374	139735639
Epithelial.Epithelial.1.1.1.1	9-region_50	4	PHPT1	9	139743176	139745488
Epithelial.Epithelial.1.1.1.1	9-region_50	4	MAMDC4	9	139745395	139755249
Epithelial.Epithelial.1.1.1.1	9-region_50	4	EDF1	9	139756571	139760738
Epithelial.Epithelial.1.1.1.1	9-region_50	4	TRAF2	9	139776364	139821059
Epithelial.Epithelial.1.1.1.1	9-region_50	4	FBXW5	9	139834887	139839148
Epithelial.Epithelial.1.1.1.1	9-region_50	4	C8G	9	139839698	139841426
Epithelial.Epithelial.1.1.1.1	9-region_50	4	PTGDS	9	139871956	139879887
Epithelial.Epithelial.1.1.1.1	9-region_50	4	C9orf142	9	139886870	139888436
Epithelial.Epithelial.1.1.1.1	9-region_50	4	CLIC3	9	139889087	139891255
Epithelial.Epithelial.1.1.1.1	9-region_50	4	ABCA2	9	139901686	139923367
Epithelial.Epithelial.1.1.1.1	9-region_50	4	NPDC1	9	139933922	139940655
Epithelial.Epithelial.1.1.1.1	9-region_50	4	ENTPD2	9	139942550	139948497
Epithelial.Epithelial.1.1.1.1	9-region_50	4	SAPCD2	9	139956581	139965040
Epithelial.Epithelial.1.1.1.1	9-region_50	4	MAN1B1	9	139981379	140003635
Epithelial.Epithelial.1.1.1.1	9-region_50	4	DPP7	9	140004994	140009629
Epithelial.Epithelial.1.1.1.1	9-region_50	4	ANAPC2	9	140069236	140082989
Epithelial.Epithelial.1.1.1.1	9-region_50	4	SSNA1	9	140083099	140084822
Epithelial.Epithelial.1.1.1.1	9-region_50	4	TPRN	9	140086069	140098645
Epithelial.Epithelial.1.1.1.1	9-region_50	4	TMEM203	9	140098534	140100090
Epithelial.Epithelial.1.1.1.1	9-region_50	4	TUBB4B	9	140135665	140138159
Epithelial.Epithelial.1.1.1.1	9-region_50	4	NELFB	9	140149625	140167998
Epithelial.Epithelial.1.1.1.1	9-region_50	4	TOR4A	9	140172201	140177093
Epithelial.Epithelial.1.1.1.1	9-region_50	4	NRARP	9	140194083	140196703
Epithelial.Epithelial.1.1.1.1	9-region_50	4	EXD3	9	140201348	140317714
Epithelial.Epithelial.1.1.1.1	9-region_50	4	NOXA1	9	140317802	140328858
Epithelial.Epithelial.1.1.1.1	9-region_50	4	ENTPD8	9	140328816	140336268
Epithelial.Epithelial.1.1.1.1	9-region_50	4	NSMF	9	140342022	140353786
Epithelial.Epithelial.1.1.1.1	9-region_50	4	MRPL41	9	140445651	140447007
Epithelial.Epithelial.1.1.1.1	9-region_50	4	DPH7	9	140449356	140473387
Epithelial.Epithelial.1.1.1.1	9-region_50	4	ZMYND19	9	140476531	140484942
Epithelial.Epithelial.1.1.1.1	9-region_50	4	ARRDC1	9	140500106	140509812
Epithelial.Epithelial.1.1.1.1	9-region_50	4	EHMT1	9	140513444	140764468
Epithelial.Epithelial.1.1.1.1	10-region_51	2	ZMYND11	10	180405	300577
Epithelial.Epithelial.1.1.1.1	10-region_51	2	DIP2C	10	320130	735683
Epithelial.Epithelial.1.1.1.1	10-region_51	2	LARP4B	10	855484	977564
Epithelial.Epithelial.1.1.1.1	10-region_51	2	GTPBP4	10	1034338	1065876
Epithelial.Epithelial.1.1.1.1	10-region_51	2	IDI1	10	1085848	1095110
Epithelial.Epithelial.1.1.1.1	10-region_51	2	PFKP	10	3108525	3179904
Epithelial.Epithelial.1.1.1.1	10-region_51	2	PITRM1	10	3179920	3215003
Epithelial.Epithelial.1.1.1.1	10-region_51	2	KLF6	10	3818188	3827473
Epithelial.Epithelial.1.1.1.1	10-region_51	2	AKR1C1	10	4934796	5025475
Epithelial.Epithelial.1.1.1.1	10-region_51	2	AKR1C2	10	5029967	5060223
Epithelial.Epithelial.1.1.1.1	10-region_51	2	AKR1C3	10	5077546	5149878
Epithelial.Epithelial.1.1.1.1	10-region_51	2	NET1	10	5454514	5500426
Epithelial.Epithelial.1.1.1.1	10-region_51	2	FAM208B	10	5726801	5805703
Epithelial.Epithelial.1.1.1.1	10-region_51	2	GDI2	10	5807186	5884095
[truncated: 34,314 more rows]

## Sheet: Table S8
Table S8 Interaction strength between non-malignant epithelial cells and other cells in PT samples
source	target	ligand	receptor	prob	pval	interaction_name	interaction_name_2	pathway_name	annotation	evidence
Monocyte	Macrophage	TGFB1	TGFbR1_R2	0.00354865	0	TGFB1_TGFBR1_TGFBR2	TGFB1 - (TGFBR1+TGFBR2)	TGFb	Secreted Signaling	KEGG: hsa04350
T_cell	Macrophage	TGFB1	TGFbR1_R2	0.0012757	0	TGFB1_TGFBR1_TGFBR2	TGFB1 - (TGFBR1+TGFBR2)	TGFb	Secreted Signaling	KEGG: hsa04350
NK	Macrophage	TGFB1	TGFbR1_R2	0.00502448	0	TGFB1_TGFBR1_TGFBR2	TGFB1 - (TGFBR1+TGFBR2)	TGFb	Secreted Signaling	KEGG: hsa04350
[truncated: 465 more rows]

## Sheet: Table S9
Table S9 Interaction strength between malignant epithelial cells and other cells in PT samples
[truncated: 481 more rows]

[truncated: 1 more sheets: Table S10]
