# Supplementary material for: Single-cell and spatial transcriptomic analyses reveal the cellular origins and drivers of liver metastasis from pancreatic cancer
Source: Research Square preprint supplement (doi:10.21203/rs.3.rs-4128922/v1), 2024-04-18
Supplement: Supplementary file 2 [file aa59f0c600eee219861f4bea.docx]

**List of Supporting Information**

Figure S1. Construction of metastatic risk model in pancreatic cancer. (A) GO enrichment results of differentially expressed genes (DEGs) between malignant and non-malignant epithelial cells in PT samples. (B) KEGG enrichment results of DEGs between malignant and non-malignant epithelial cells in PT samples. (C) The survival rate of pancreatic cancer patients with high- and low-index. (D) results of transcription factor analysis of malignant epithelial cells and non-malignant epithelial cells in PT samples.

Table S1 The information of primary tumor and liver metastatic pancreatic cancer samples in the GEO databas.

Table S2 The information of pancreatic cancer samples in the TCGA cohort.

Table S3 The information of pancreatic cancer tissue microarray samples.

Table S4 The primer sequences of qRT-PCR.

Table S5 The sequence of ITGAV siRNA.

Table S6 The CNV changed genes were shared by all subclonal cell populations of PT samples.

Table S7 The CNV changed genes were shared by all subclonal cell populations of LM samples.

Table S8 Interaction strength between non-malignant epithelial cells and other cells in PT samples.

Table S9 Interaction strength between malignant epithelial cells and other cells in PT samples.

Table S10 Genes significantly enriched in the PI3K signaling pathway.
