# Supplementary figures and images for: Single-cell and spatial transcriptomic analyses reveal the cellular origins and drivers of liver metastasis from pancreatic cancer
Source: Research Square preprint supplement (doi:10.21203/rs.3.rs-4128922/v1), 2024-04-18

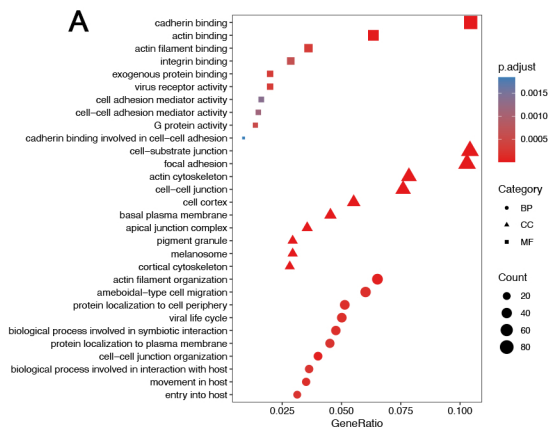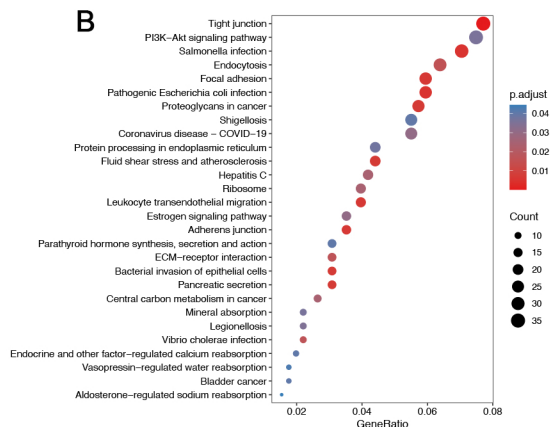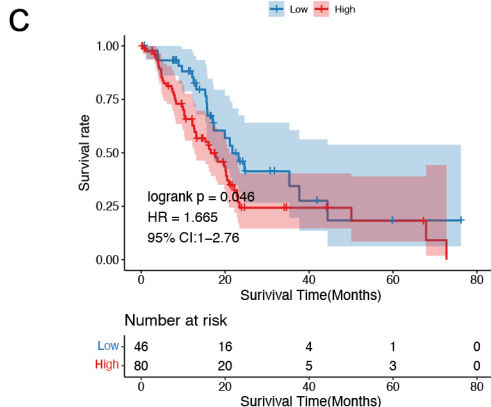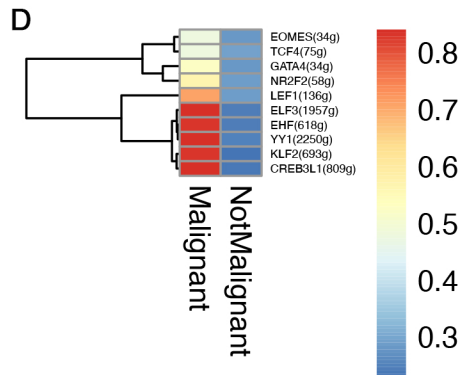

Supplement: Supplementary file 1 [file 78f61a20c7da5249f254a65a.pdf]
